# Supplementary material
Source: PubMed Central journal article supplement (PMC10290755)

**Supplementary Data 3. Forest plot for index variants in IBD-associated loci.** The title of each page shows the disease subtype, the index variant of the locus, and the nearest gene to the index variant. Pval: original P-value from the fixed-effect meta-analysis (two-tailed). HetPval: original P-value from the heterogeneous test (Cochrane's Q test, two-sided). logBF: log<sub>10</sub> Bayes Factor from Bayesian transethnic meta-analysis (MANTRA). OR: Odds ratio. 95% CI: 95% confidence interval. Data are presented as mean value  $\pm$  95% confidence interval (Error bar).

CD

chr1:24968082:G:A rs7525903 RUNX3

Reference allele: G Effect allele: A

Reported: NEW

Source: EUR+EAS

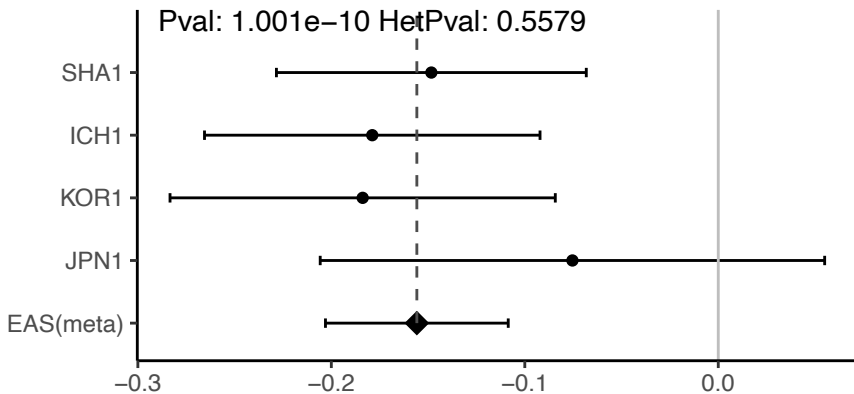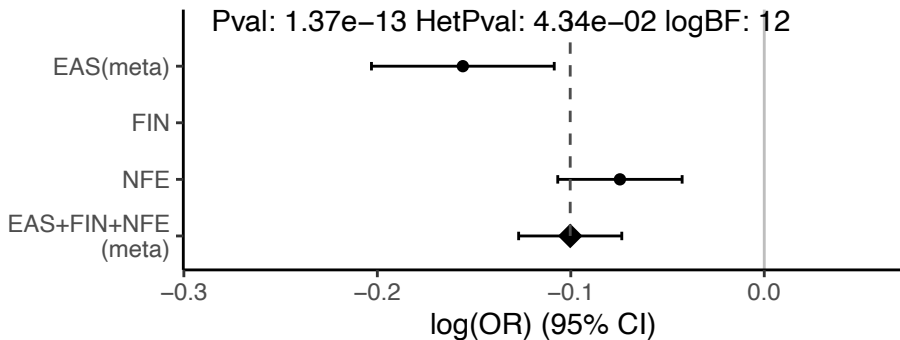

CD

chr1:28131939:C:T rs140466198 PTAFR

Reference allele: C Effect allele: T

Reported: NEW

Source: EUR+EAS

Pval: 1.052e-08 HetPval: 0.6482

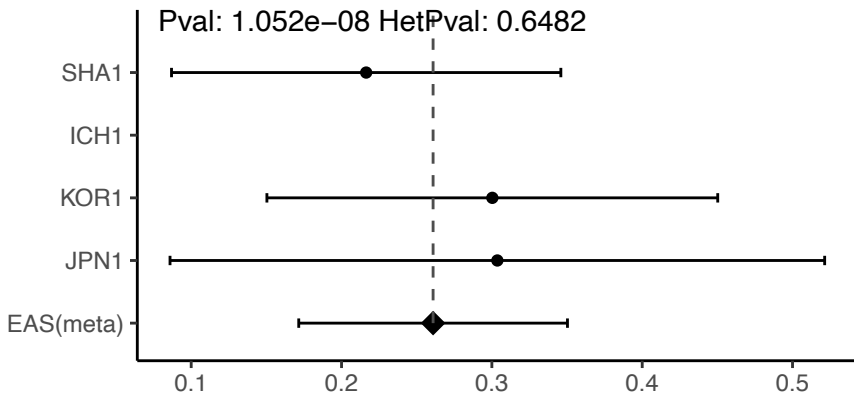

Pval: 1.05e-08 HetPval: 6.48e-01 logBF: 6.4

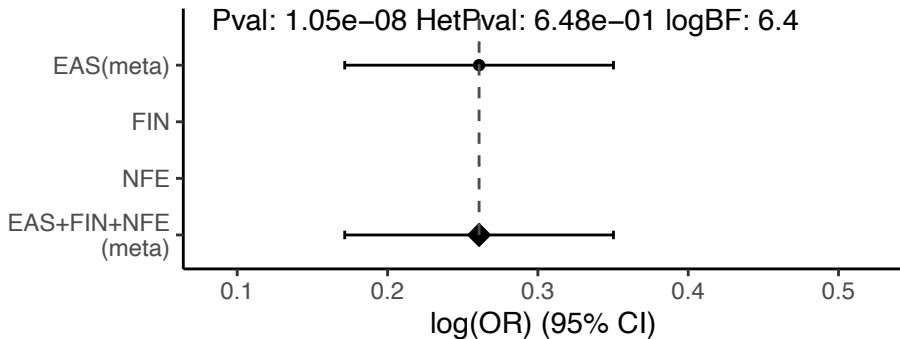

CD

chr1:62768997:T:A rs7543380 ATG4C

Reference allele: T Effect allele: A

Reported: NFE

Source: EUR+EAS

Pval: 7.114e-05 HetPval: 0.938

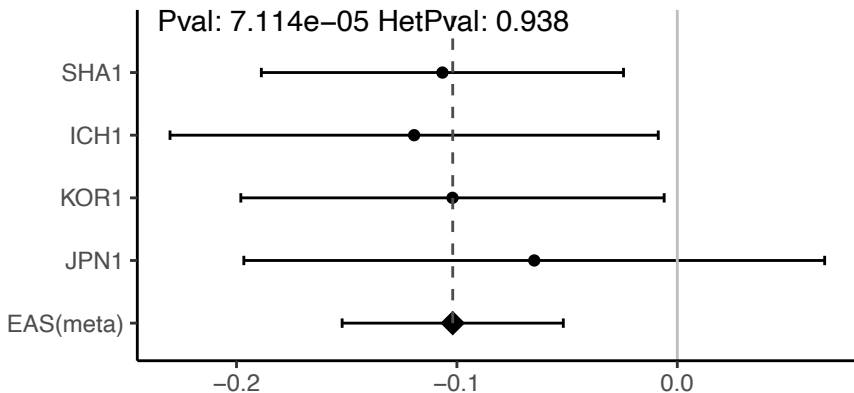

Pval: 8.59e-09 HetPval: 8.11e-01 logBF: 6.8

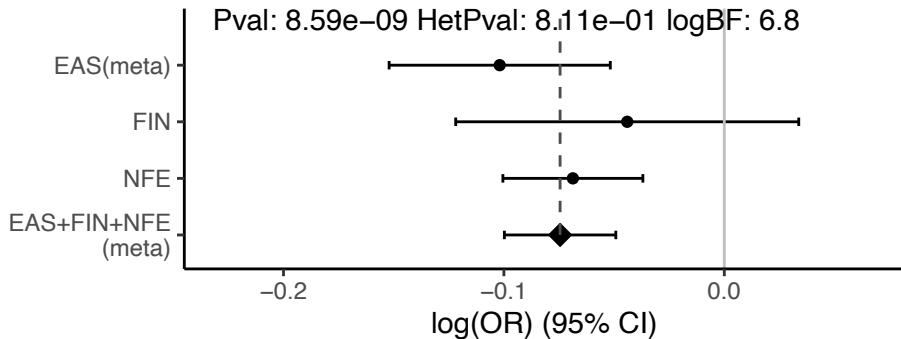

CD

chr1:93349933:T:C rs3767964 DR1

Reference allele: T Effect allele: C

Reported: NEW

Source: EUR+EAS

Pval: 5.815e-06 HetPval: 0.6291

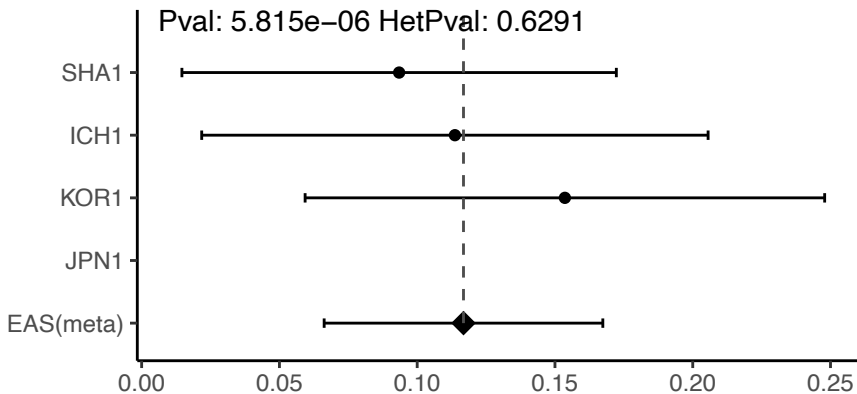

Pval: 2.19e-10 HetPval: 4.95e-01 logBF: 8.4

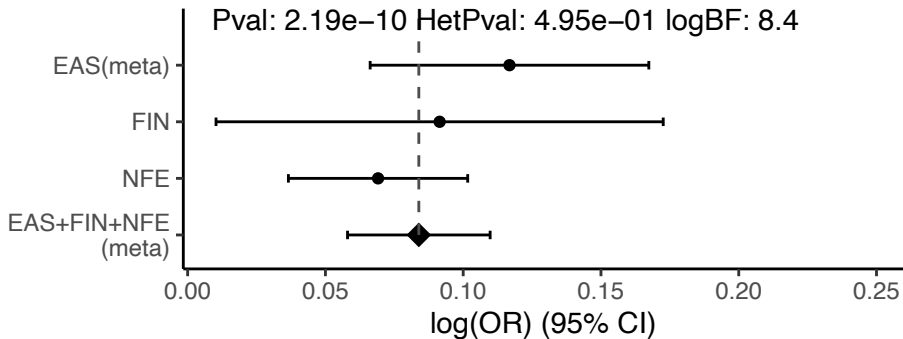

CD

chr1:113834946:A:G rs2476601 PTPN22

Reference allele: A Effect allele: G

Reported: NFE

Source: EUR+EAS

Pval: - HetPval: -

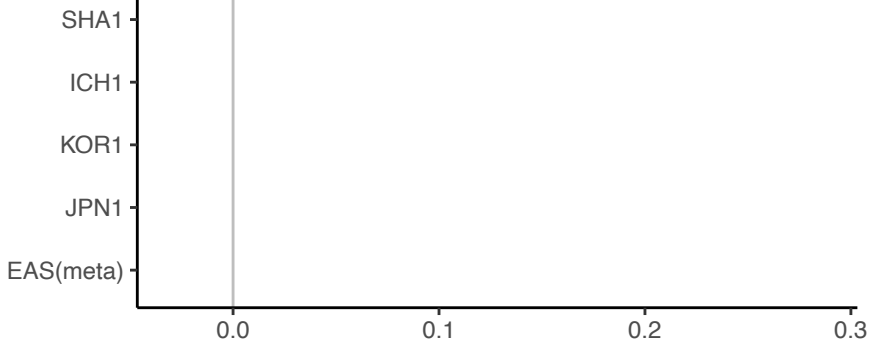

Pval:  $5.58e-15$  HetPval:  $1.23e-02$  logBF: 13

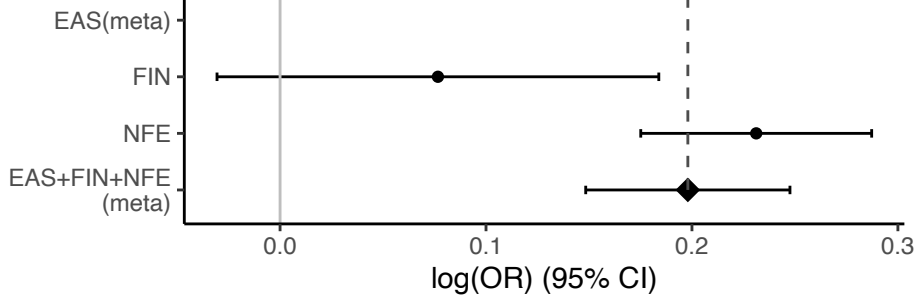

CD

chr1:172877652:A:G rs10912488 AIMP1P2

Reference allele: A Effect allele: G

Reported: NFE

Source: EUR+EAS

Pval: 0.0006457 HetPval: 0.8842

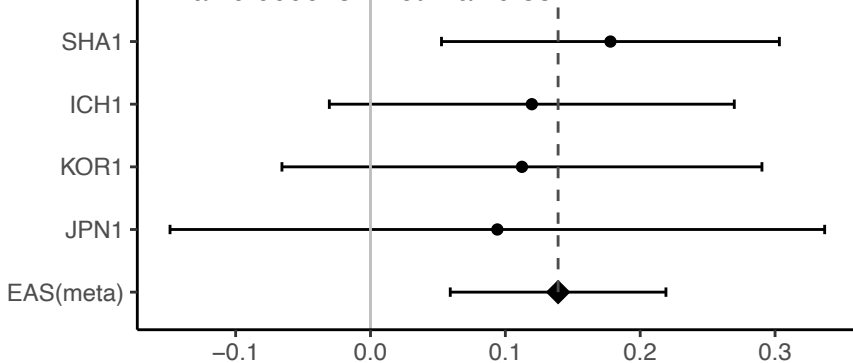

Pval: 5.53e-24 HetPval: 8.75e-01 logBF: 22

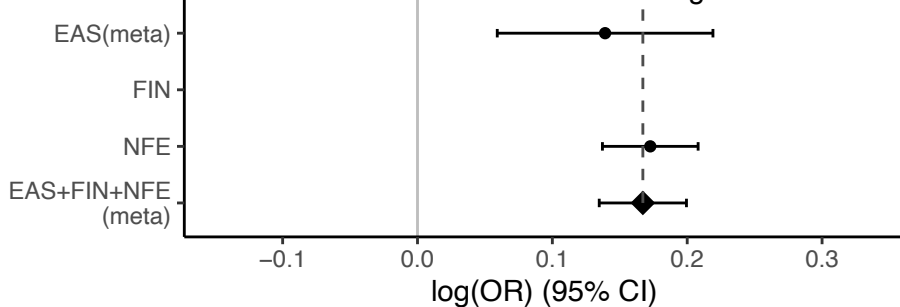

CD

chr1:179134699:T:C rs72709461 ABL2

Reference allele: T Effect allele: C

Reported: NEW

Source: EUR+EAS

Pval: 3.253e-07 HetPval: 0.09055

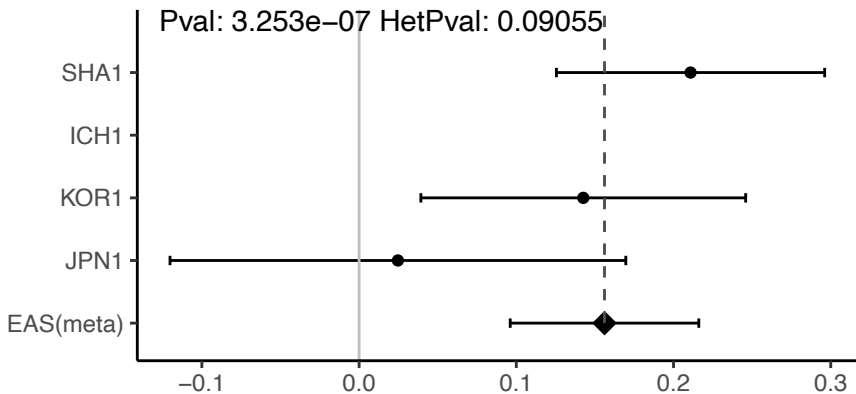

Pval: 2.14e-10 HetPval: 4.51e-02 logBF: 8.4

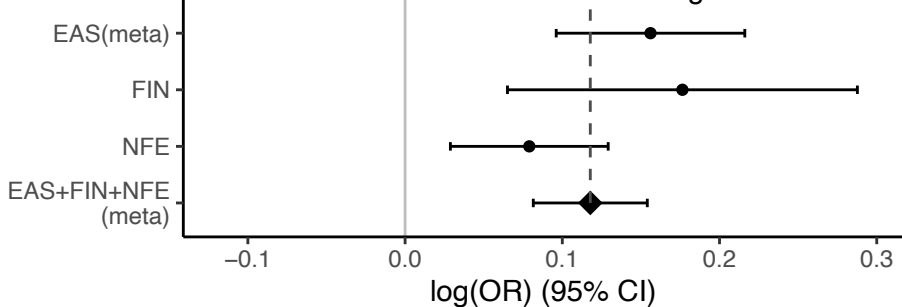



# CD

chr2:27508073:T:C rs1260326 GCKR

Reference allele: T Effect allele: C

Reported: NFE

Source: EUR+EAS

Pval: 0.0001216 HetPval: 0.1701

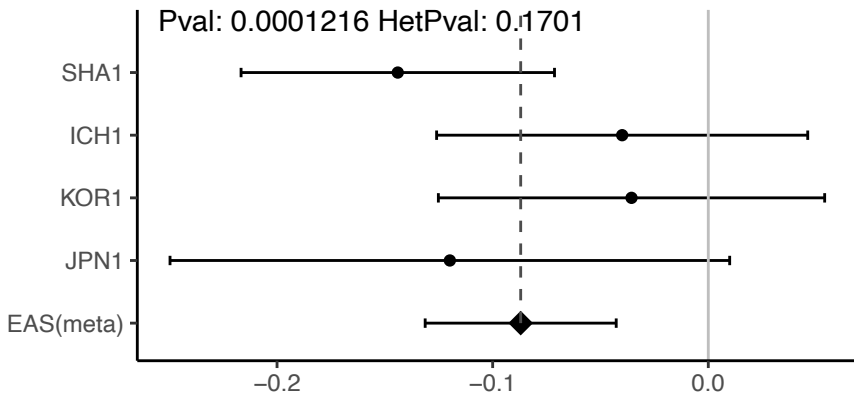

Pval: 2.28e-16 HetPval: 2.97e-01 logBF: 14

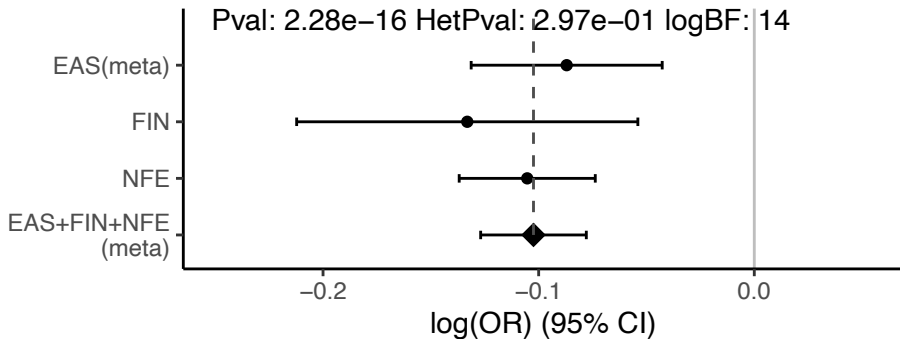

CD

chr2:28423081:C:T rs12478126 FOSL2

Reference allele: C Effect allele: T

Reported: NFE

Source: EUR+EAS

Pval: 0.0008501 HetPval: 0.4977

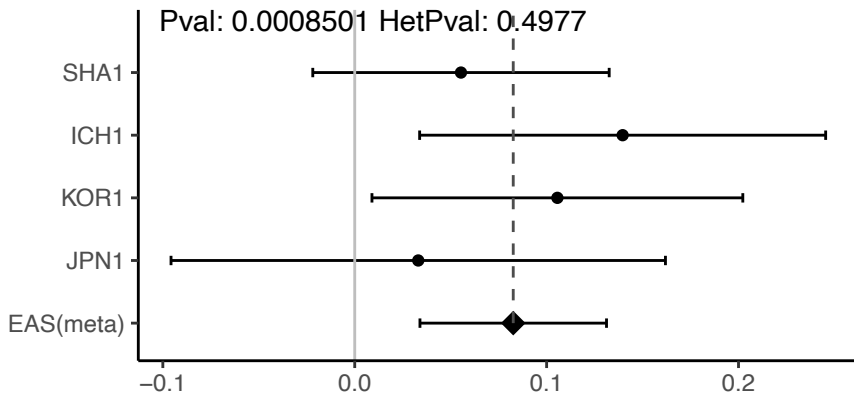

Pval: 2.96e-16 HetPval: 3.79e-01 logBF: 14

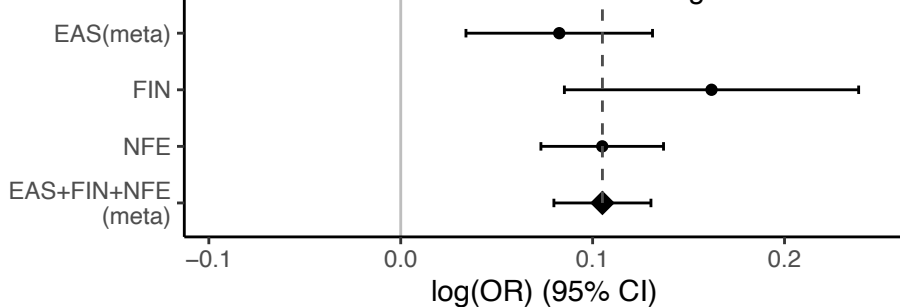

# CD

chr2:43582208:G:C rs78487399 THADA

Reference allele: G Effect allele: C

Reported: NFE

Source: EUR+EAS

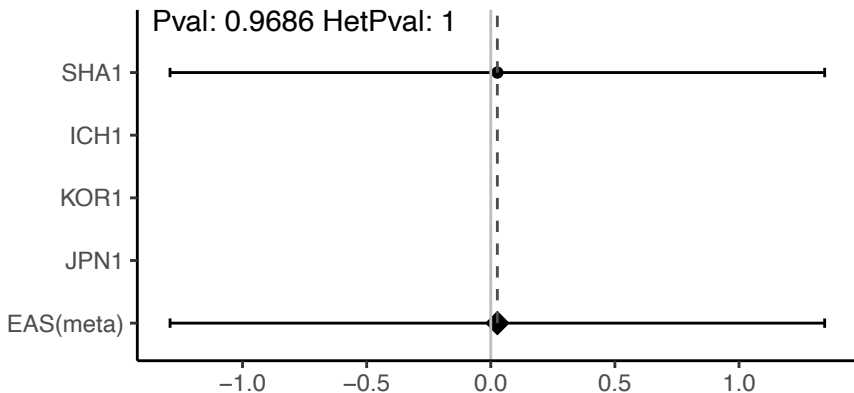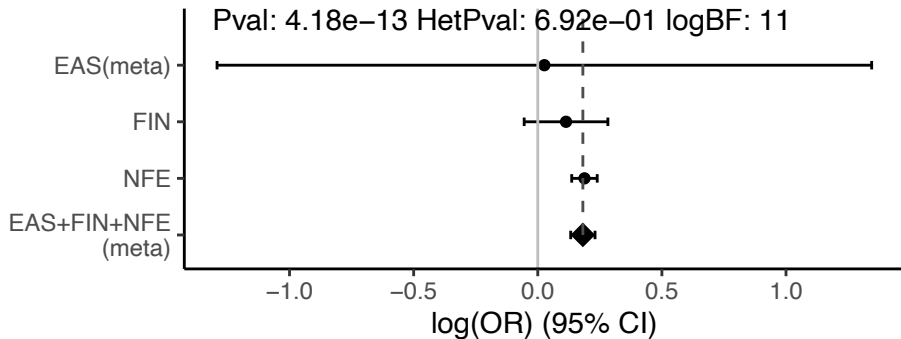

CD

chr2:62332070:T:C rs6759003 RN7SL51P

Reference allele: T Effect allele: C

Reported: NFE

Source: EUR+EAS

Pval: 0.00517 HetPval: 0.3992

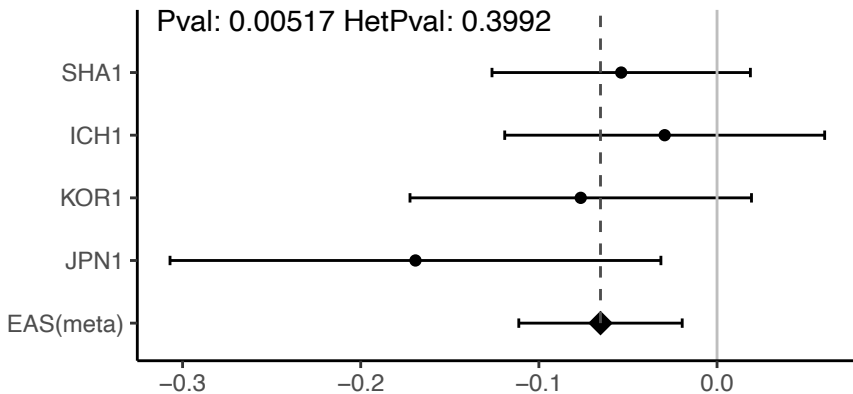

Pval: 4.76e-09 HetPval: 3.49e-01 logBF: 6.9

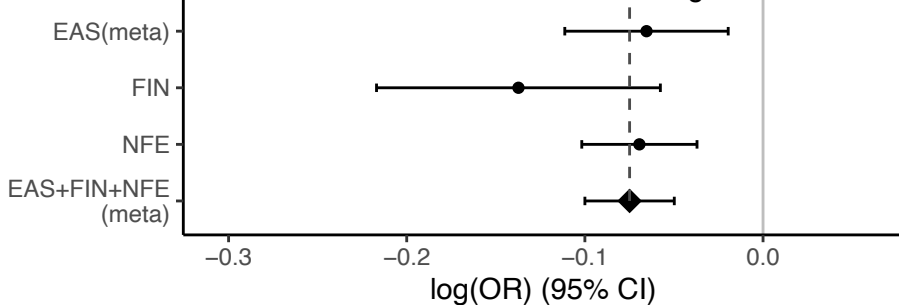

CD

chr2:105777237:G:A rs12475901 NCK2

Reference allele: G Effect allele: A

Reported: NEW

Source: EUR+EAS

Pval: 0.06567 HetPval: 0.5725

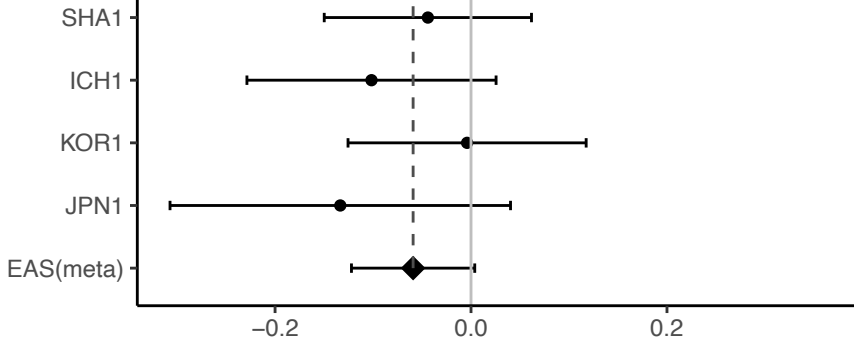

Pval:  $7.98 \times 10^{-2}$  HetPval:  $1.47 \times 10^{-6}$  logBF: 6.2

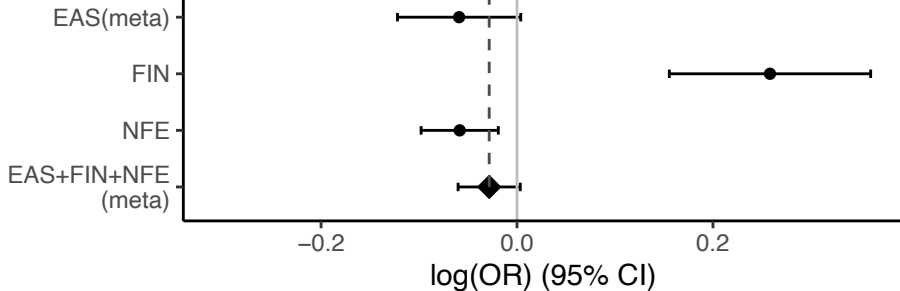

CD

chr2:172559679:C:G rs151175749 PDK1

Reference allele: C Effect allele: G

Reported: NEW

Source: EUR+EAS

Pval: 0.09378 HetPval: 0.4532

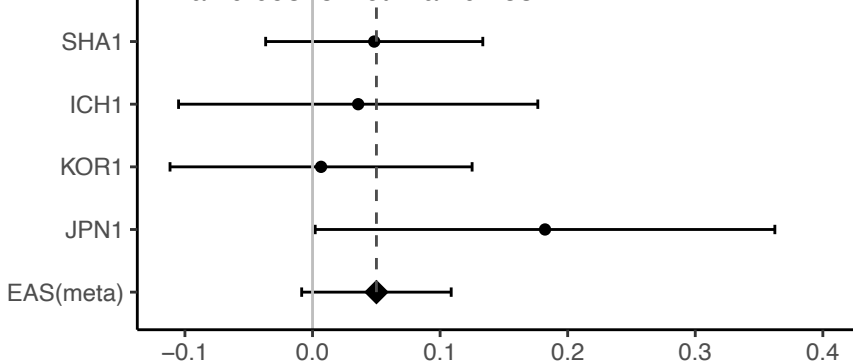

Pval: 9.57e-07 HetPval: 4.05e-03 logBF: 6.3

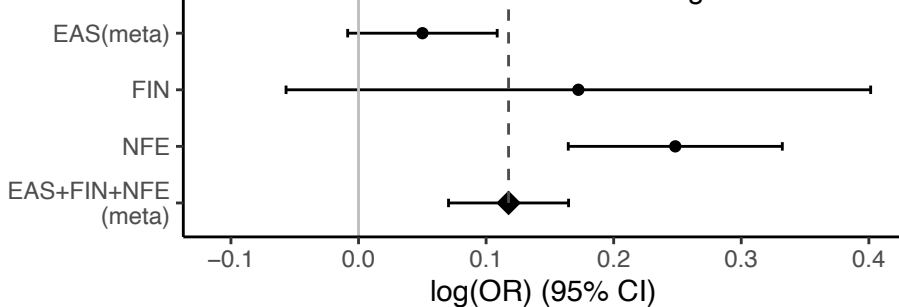

# CD

chr2:190704810:C:T rs142152795 NAB1

Reference allele: C Effect allele: T

Reported: NFE

Source: EUR+EAS

Pval: 2.107e-09 HetPval: 0.5876

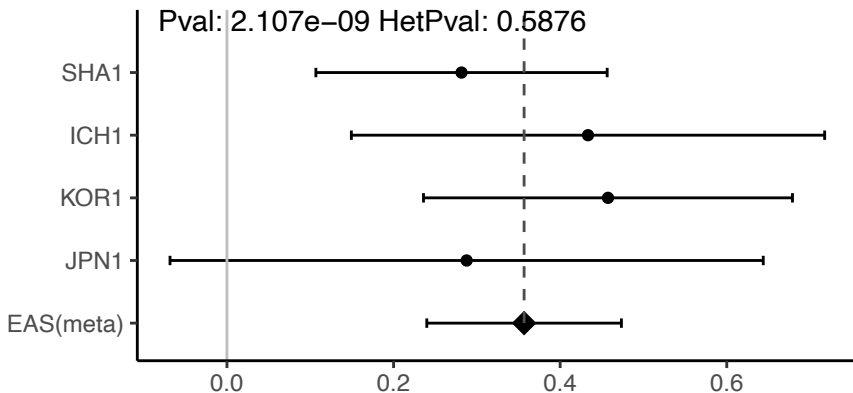

Pval: 2.11e-09 HetPval: 5.88e-01 logBF: 6.9

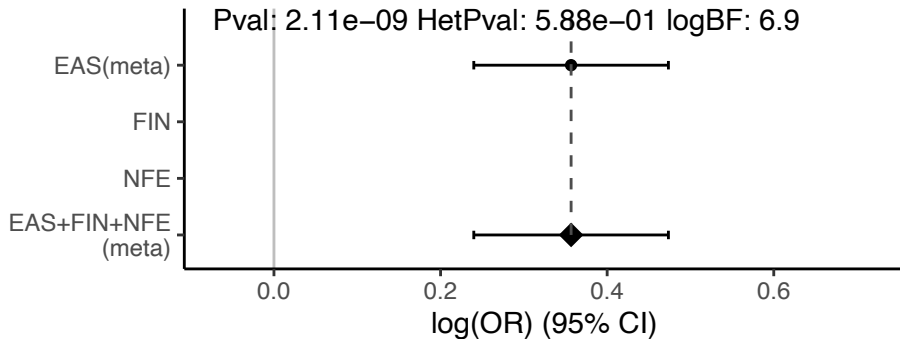

CD

chr2:198032171:A:G rs6738825 PLCL1

Reference allele: A Effect allele: G

Reported: NFE

Source: EUR+EAS

Pval: 9.404e-05 HetPval: 0.3585

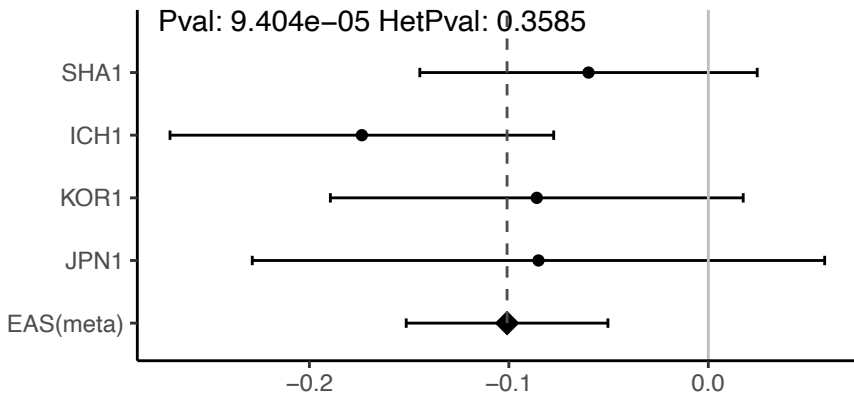

Pval: 3.21e-11 HetPval: 4.84e-01 logBF: 9.1

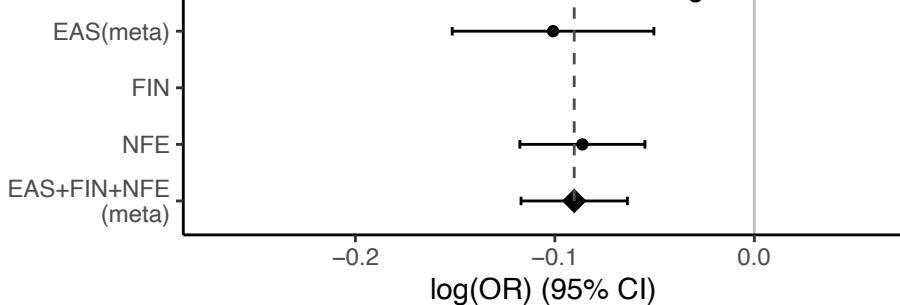



CD

chr2:230251261:C:T rs13385151 SP140

Reference allele: C Effect allele: T

Reported: NFE

Source: EUR+EAS

Pval: 0.1014 HetPval: 1

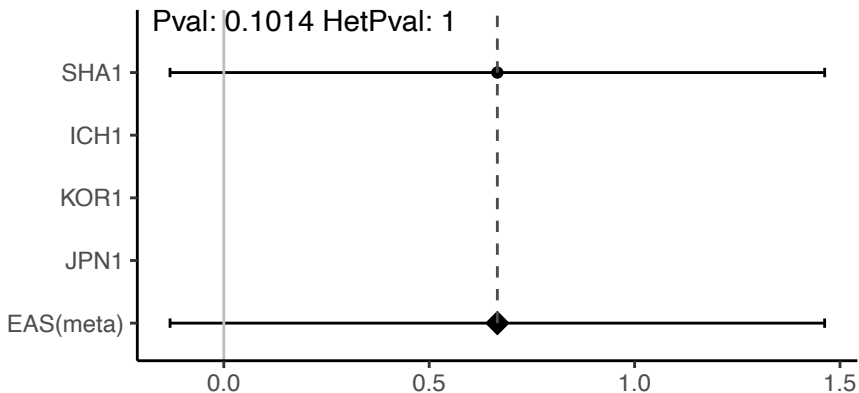

Pval: 2.19e-16 HetPval: 4.48e-01 logBF: 14

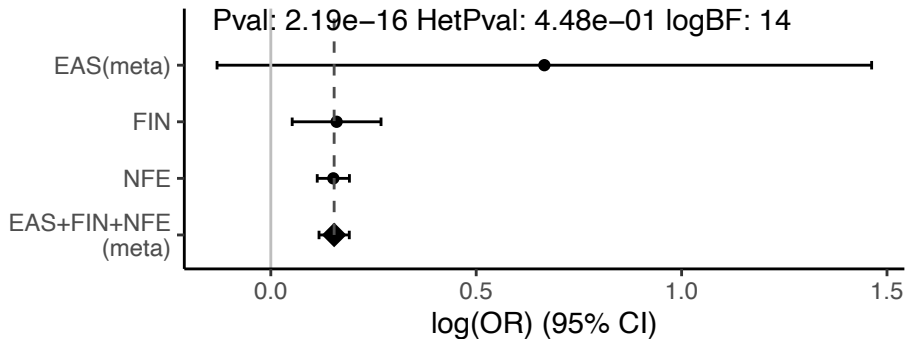

CD

chr2:233252565:A:T rs12692254 ATG16L1

Reference allele: A Effect allele: T

Reported: NFE

Source: EUR+EAS

Pval: 3.281e-09 HetPval: 0.01266

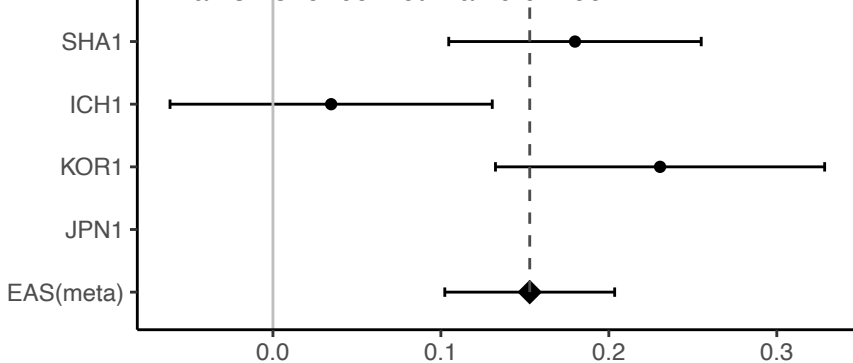

Pval: 2.19e-63 HetPval: 3.86e-08 logBF: 67

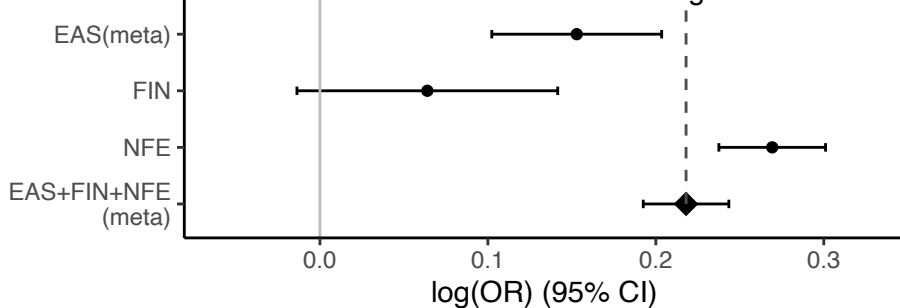

# CD

chr3:18770480:A:C rs73180609 SATB1-AS1

Reference allele: A Effect allele: C

Reported: NFE

Source: EUR+EAS

Pval:  $4.891e-06$  HetPval: 0.5736

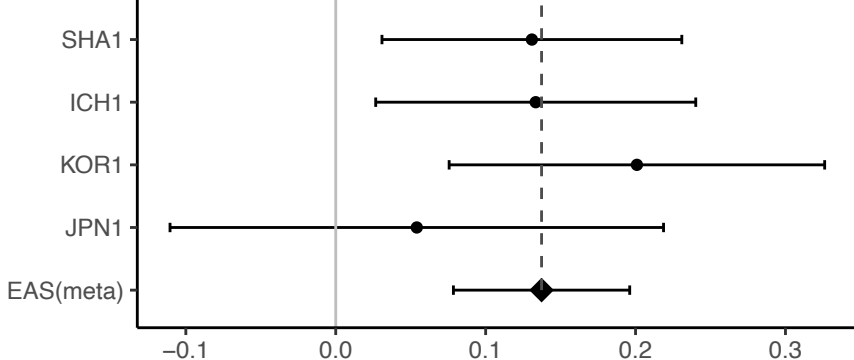

Pval:  $9.12e-11$  HetPval:  $6.71e-01$  logBF: 8.5

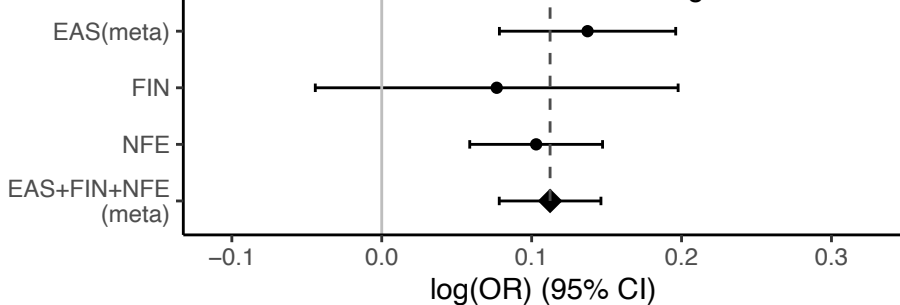

CD

chr3:53100847:T:C rs35783750 RFT1

Reference allele: T Effect allele: C

Reported: NFE

Source: EUR+EAS

Pval: 0.0002668 HetPval: 0.1174

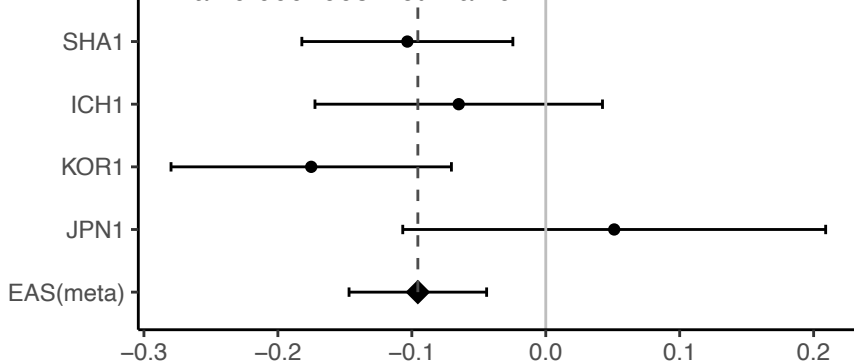

Pval: 1.22e-13 HetPval: 2.9e-01 logBF: 11

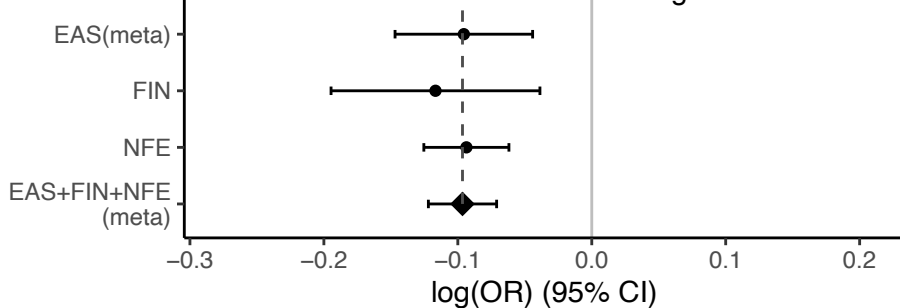

# CD

chr3:112334718:G:A rs1317244 CD200

Reference allele: G Effect allele: A

Reported: NEW

Source: EAS

Pval:  $2.648 \times 10^{-8}$  HetPval: 0.3848

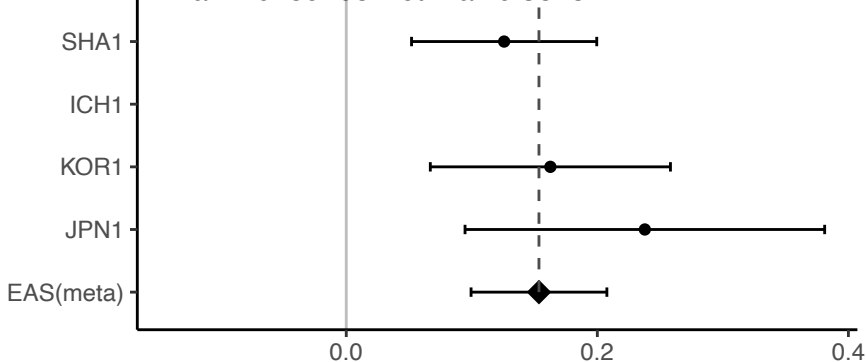

Pval:  $1.38 \times 10^{-4}$  HetPval:  $1.37 \times 10^{-4}$  logBF: 5.1

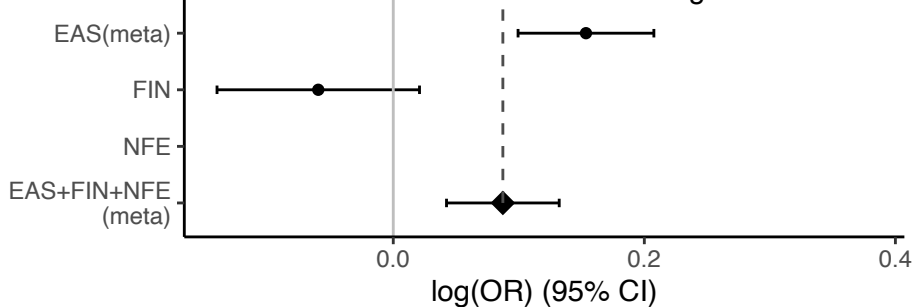

CD

chr3:141383991:G:A rs6763931 ZBTB38

Reference allele: G Effect allele: A

Reported: NFE

Source: EUR+EAS

Pval:  $2.487e-12$  HetPval: 0.4651

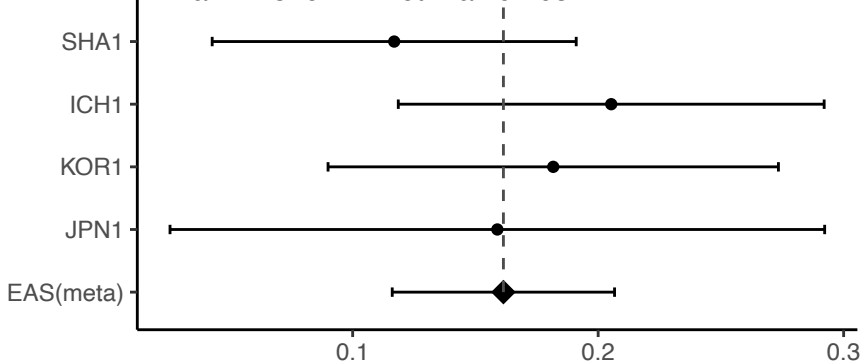

Pval:  $4.42e-19$  HetPval:  $9.29e-02$  logBF: 17

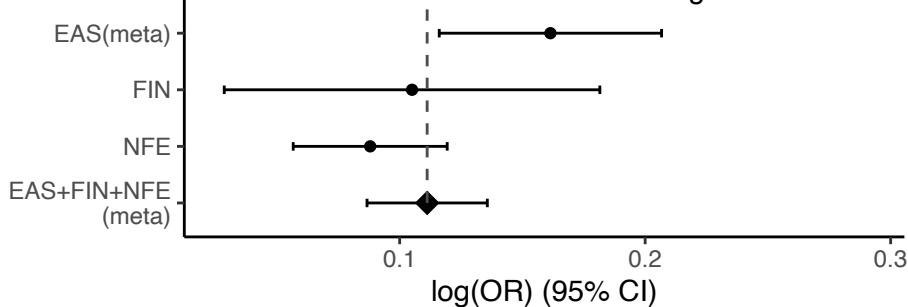

CD

chr4:102267552:C:T rs13107325 SLC39A8

Reference allele: C Effect allele: T

Reported: NFE

Source: EUR+EAS

Pval: - HetPval: -

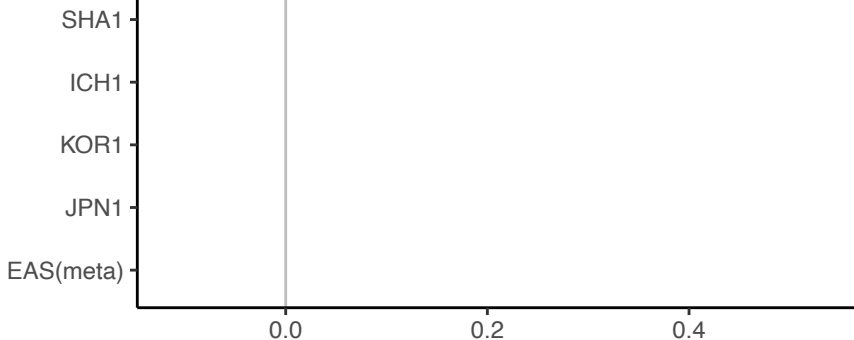

Pval:  $7.18e-13$  HetPval:  $9.56e-01$  logBF: 11

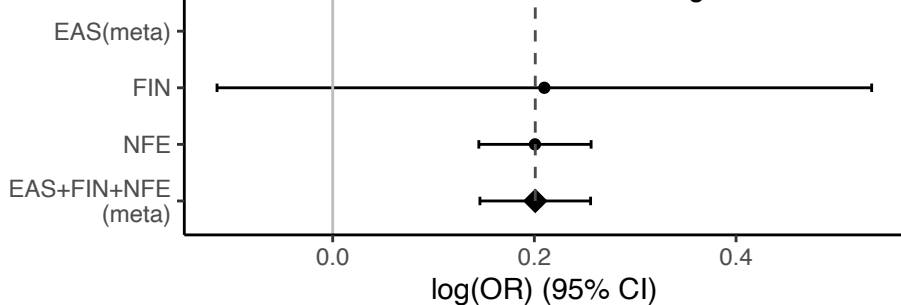

CD

chr5:73248171:C:T rs6870798 TMEM174

Reference allele: C Effect allele: T

Reported: NFE

Source: EUR+EAS

Pval: 0.0001239 HetPval: 0.04805

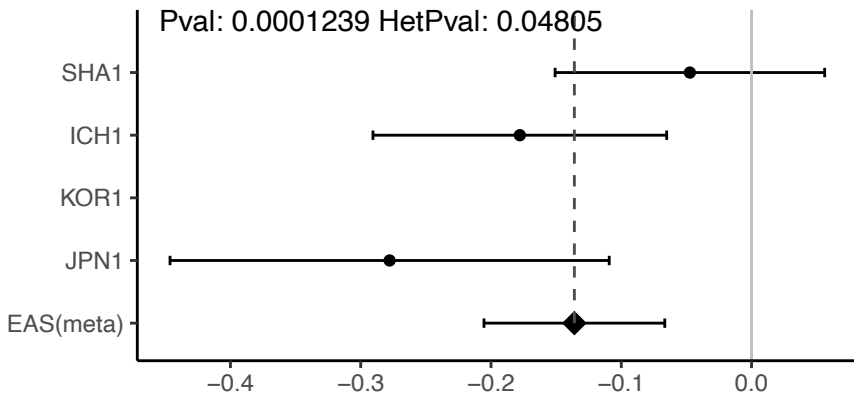

Pval: 1.12e-09 HetPval: 7.25e-02 logBF: 7.6

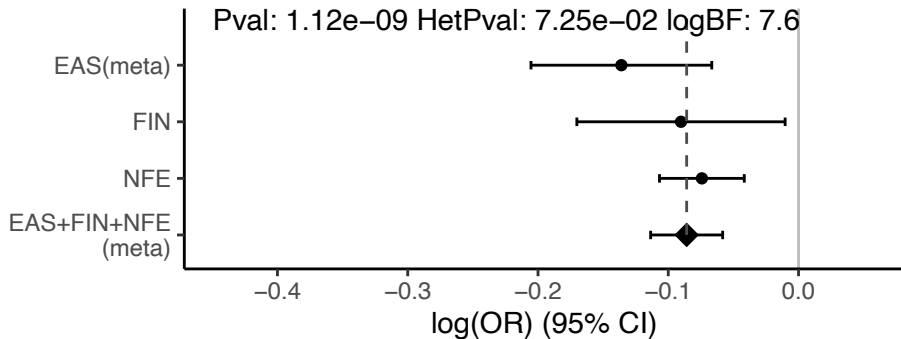



CD

chr5:96912106:T:C rs6873866 ERAP2

Reference allele: T Effect allele: C

Reported: NFE

Source: EUR+EAS

Pval: 0.006818 HetPval: 0.8033

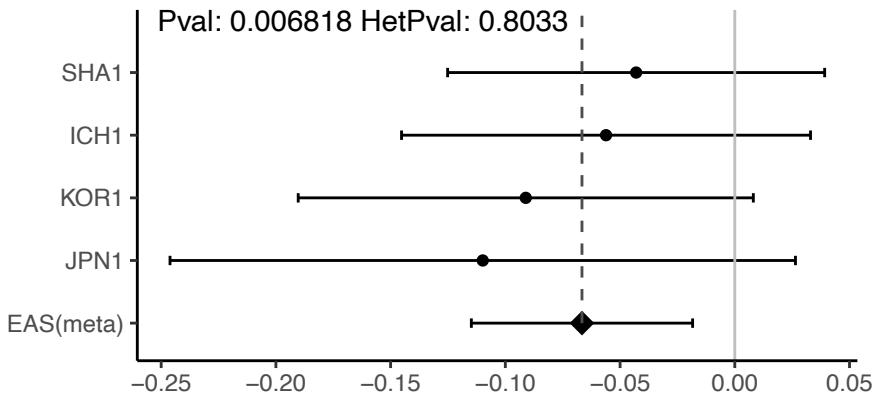

Pval: 3.13e-16 HetPval: 2.15e-01 logBF: 14

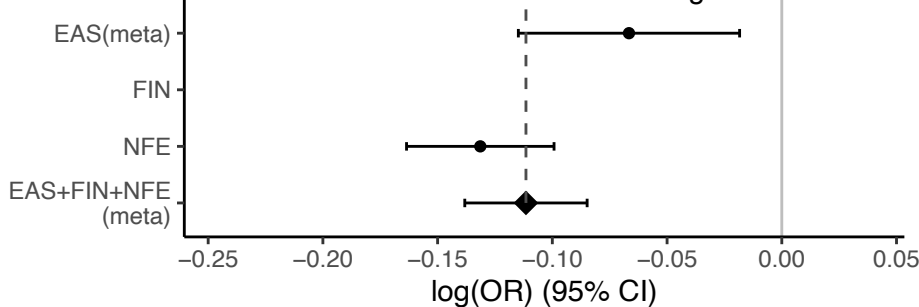

CD

chr6:44277504:G:C rs1044690 TMEM151B

Reference allele: G Effect allele: C

Reported: NFE

Source: EUR+EAS

Pval: 0.02159 HetPval: 0.1862

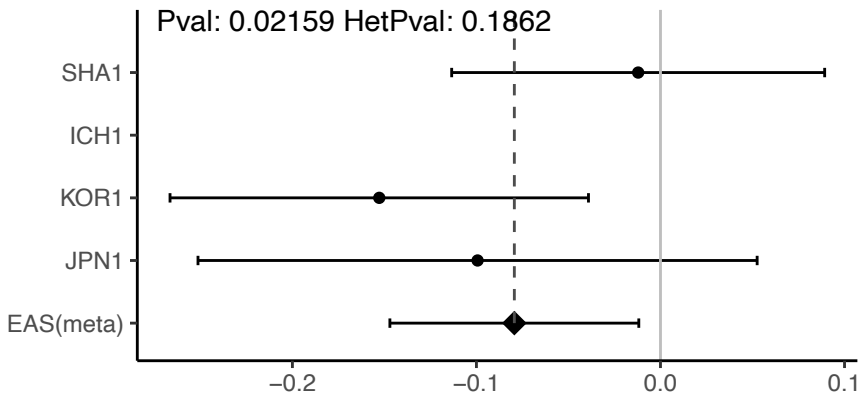

Pval: 4.31e-08 HetPval: 3.72e-01 logBF: 5.9

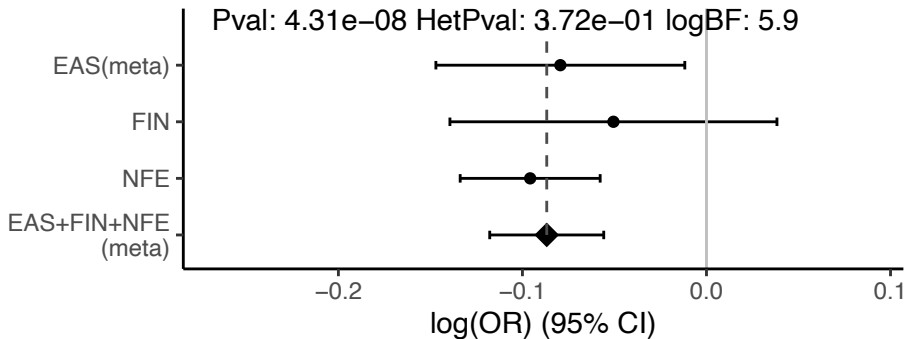

CD

chr6:90274316:C:T rs943689 BACH2

Reference allele: C Effect allele: T

Reported: NFE

Source: EUR+EAS

Pval: 0.1012 HetPval: 0.3999

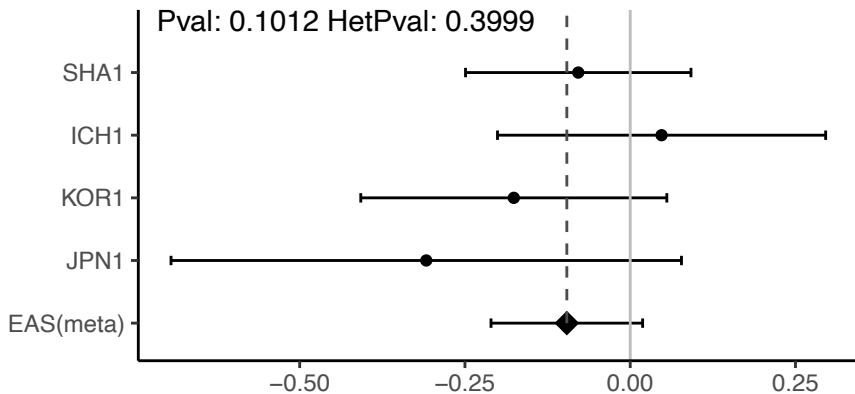

Pval: 1.57e-09 HetPval: 5.67e-01 logBF: 7.3

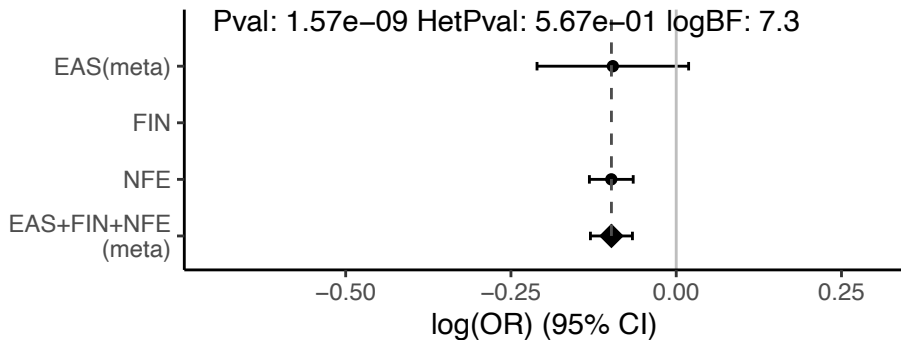

CD

chr6:127121947:T:C rs9482770 RSPO3

Reference allele: T Effect allele: C

Reported: NFE

Source: EUR+EAS

Pval: 0.01461 HetPval: 0.9599

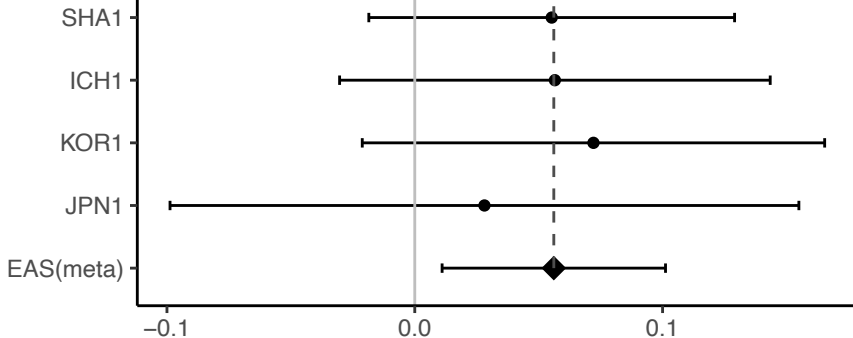

Pval: 6.19e-11 HetPval: 7.1e-01 logBF: 8.7

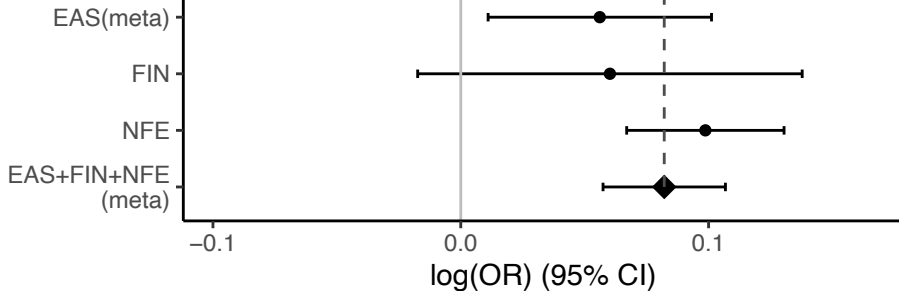

# CD

chr6:149255943:A:G rs7758080 TAB2

Reference allele: A Effect allele: G

Reported: NFE

Source: EUR+EAS

Pval:  $1.406 \times 10^{-6}$  HetPval: 0.9887

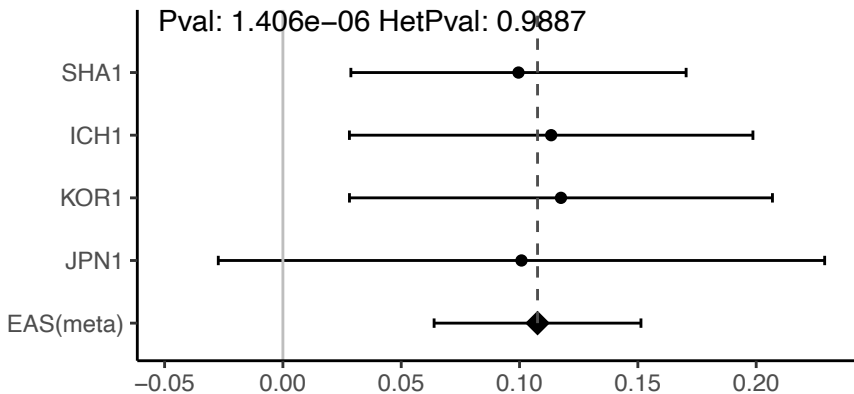

Pval:  $7.65 \times 10^{-10}$  HetPval:  $7.83 \times 10^{-1}$  logBF: 7.7

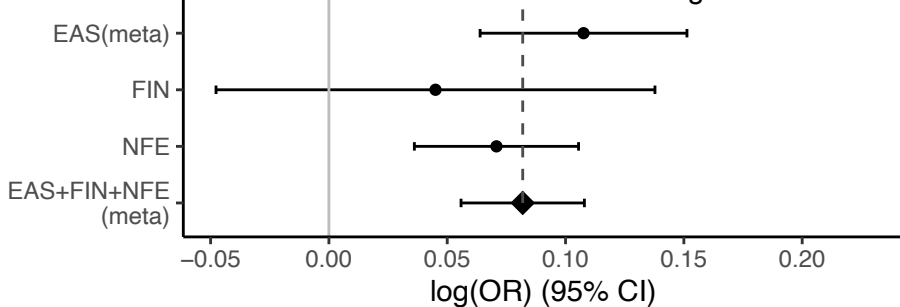

CD

chr6:159049210:G:T rs212408 TAGAP

Reference allele: G Effect allele: T

Reported: NFE

Source: EUR+EAS

Pval: 0.3744 HetPval: 0.5825

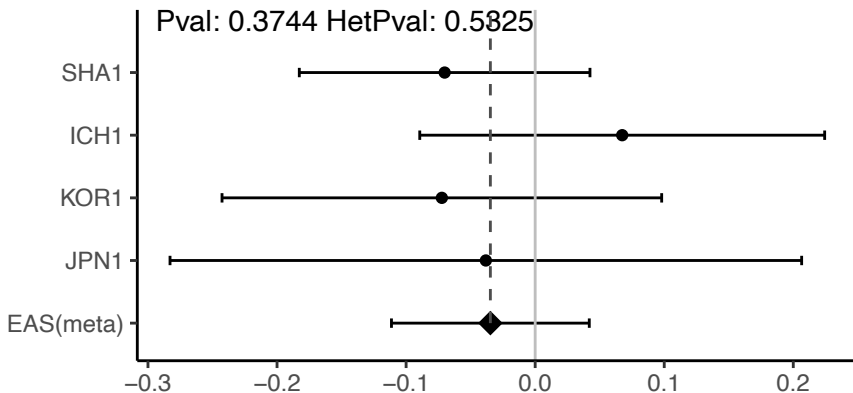

Pval: 1.33e-12 HetPval: 3.39e-01 logBF: 9.5

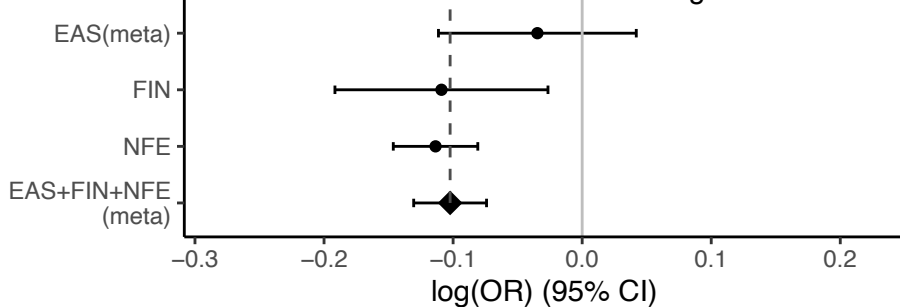

# CD

chr7:944282:T:A rs74572369 ADAP1

Reference allele: T Effect allele: A

Reported: NEW

Source: EUR+EAS

Pval:  $6.695e-14$  HetPval: 0.3144

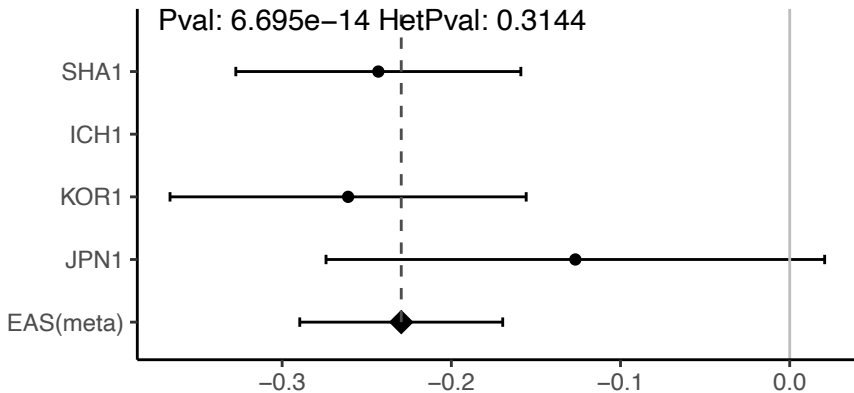

Pval:  $6.69e-14$  HetPval:  $3.14e-01$  logBF: 12

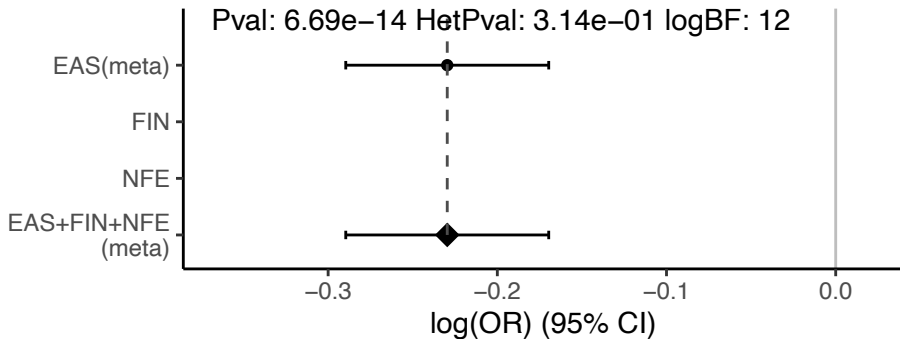

# CD

chr7:28137682:C:T rs11495981 JAZF1

Reference allele: C Effect allele: T

Reported: NFE

Source: EUR+EAS

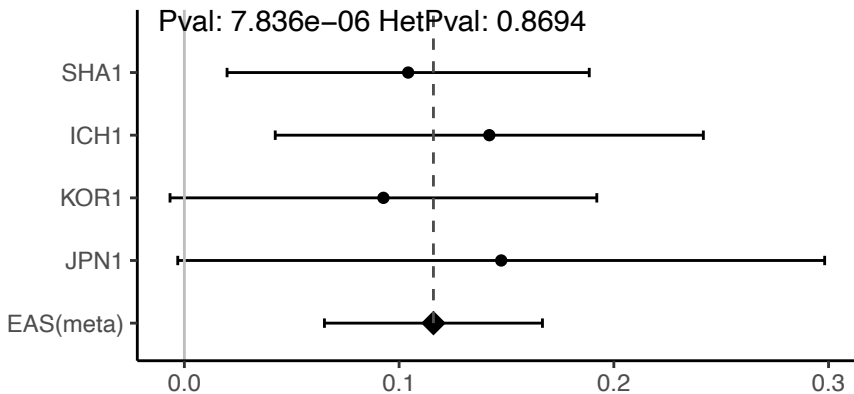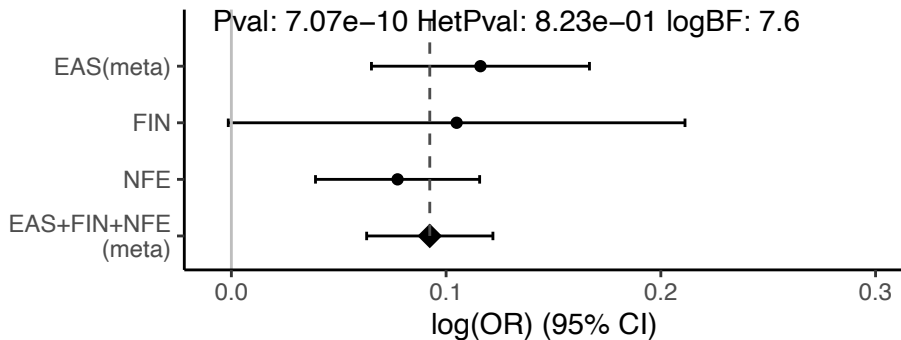



CD

chr7:37417880:A:G rs73120731 ELMO1

Reference allele: A Effect allele: G

Reported: NEW

Source: EUR+EAS

Pval: 7.816e-09 HetPval: 0.8547

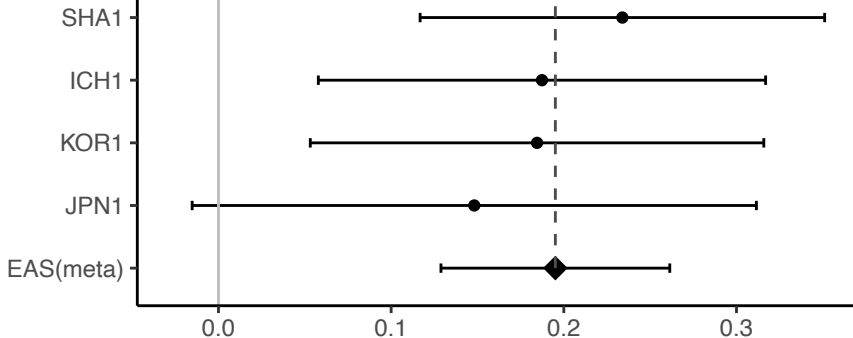

Pval: 5.29e-13 HetPval: 3.45e-01 logBF: 11

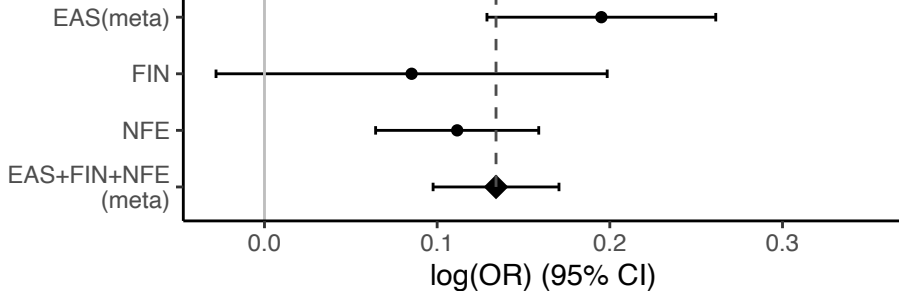

# CD

chr8:89784739:T:G rs389848 RIPK2

Reference allele: T Effect allele: G

Reported: NFE

Source: EUR+EAS

Pval: 0.003563 HetPval: 5.329e-05

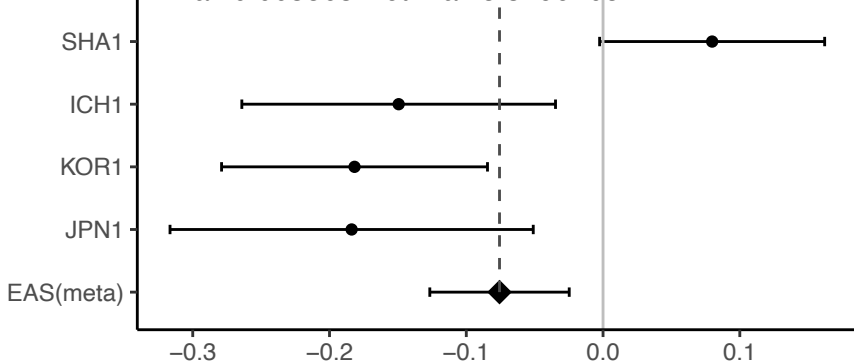

Pval: 8.45e-02 HetPval: 5.53e-06 logBF: 6

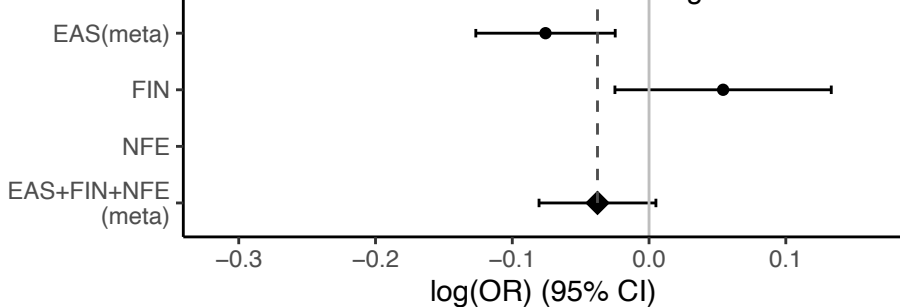

# CD

chr8:128540288:G:T rs938649 LINC00824

Reference allele: G Effect allele: T

Reported: NFE

Source: EUR+EAS

Pval: 0.2294 HetPval: 0.5622

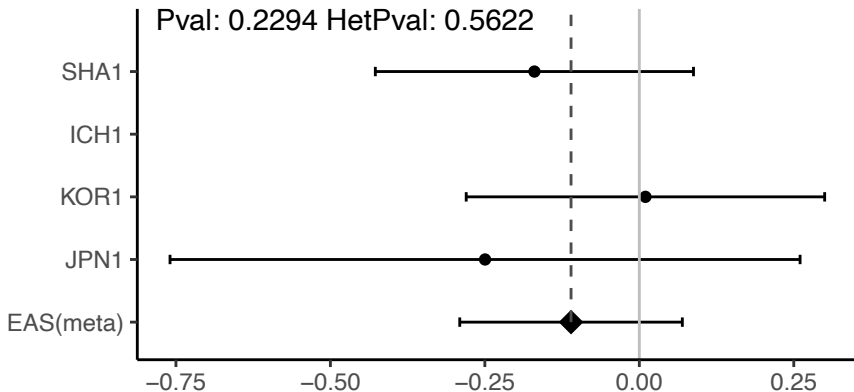

Pval: 1.55e-14 HetPval: 7.8e-01 logBF: 12

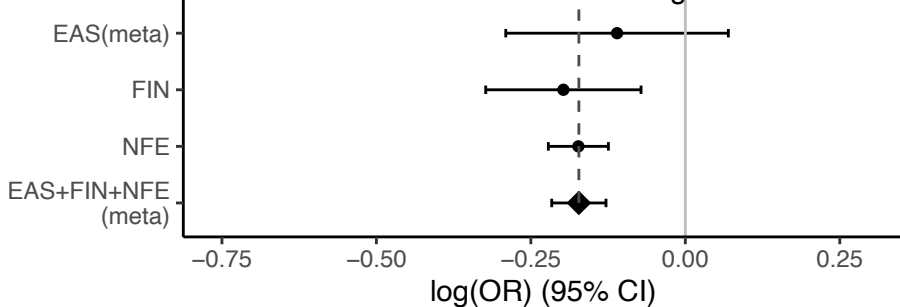

# CD

chr8:144042819:T:C rs79832570 SPATC1

Reference allele: T Effect allele: C

Reported: NEW

Source: EUR+EAS

Pval: - HetPval: -

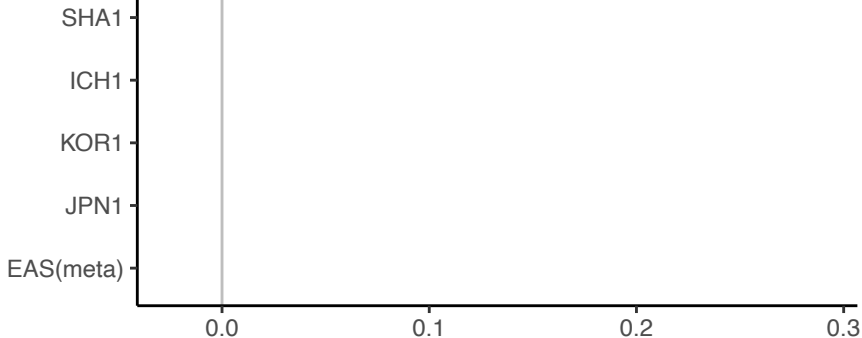

Pval: 5.71e-11 HetPval: 1.74e-01 logBF: 8.6

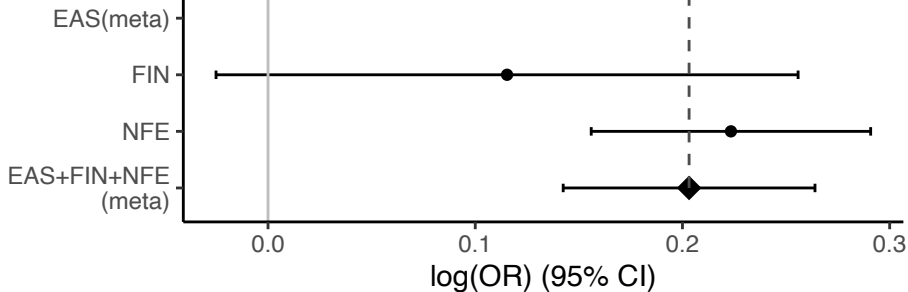

CD

chr9:271455:T:C rs682251 DOCK8

Reference allele: T Effect allele: C

Reported: NEW

Source: EUR+EAS

Pval: 0.01835 HetPval: 0.9271

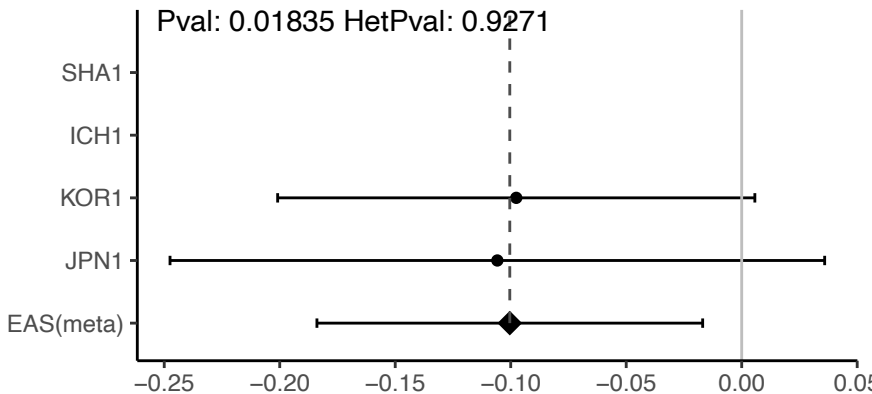

Pval: 1.56e-08 HetPval: 8.99e-01 logBF: 6.4

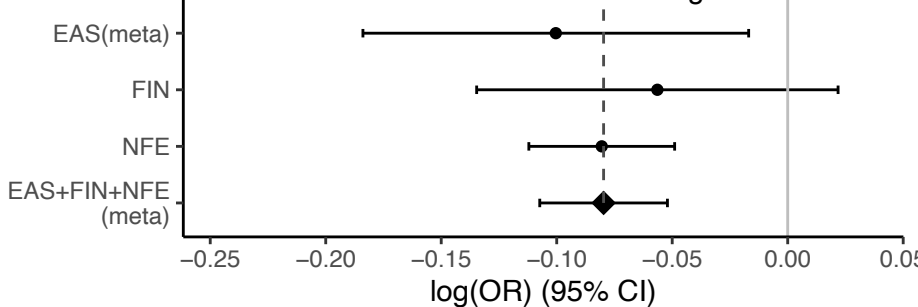

CD

chr9:133257521:T:TC rs8176719 ABO

Reference allele: T Effect allele: TC

Reported: NEW

Source: EUR+EAS

Pval: 3.241e-06 HetPval: 0.04081

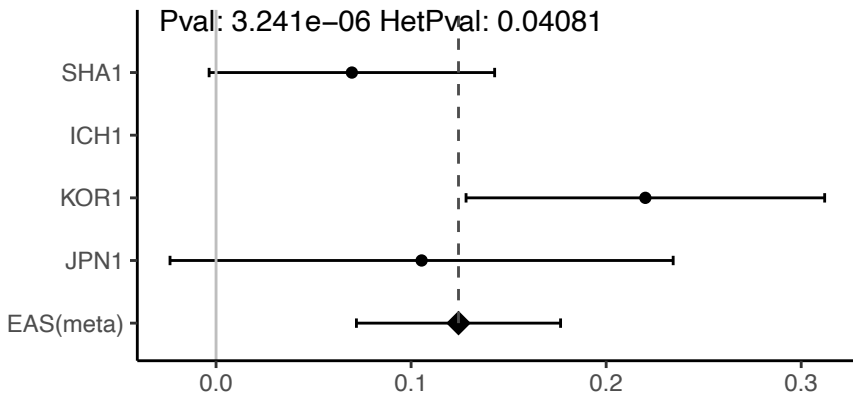

Pval: 1.3e-09 HetPval: 4.05e-02 logBF: 7.7

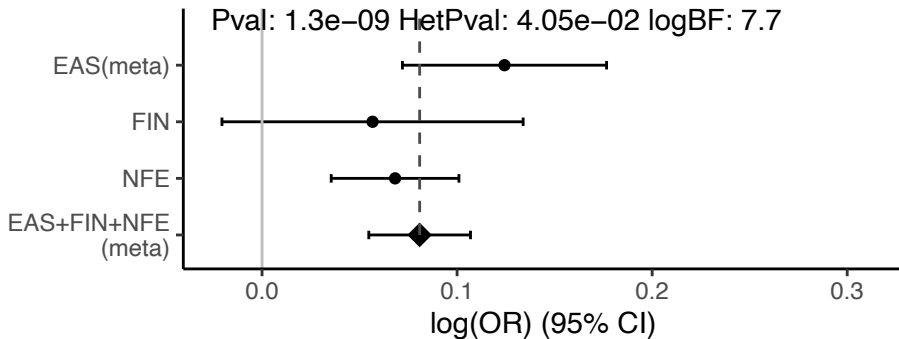

# CD

chr10:48182406:G:T rs769009 FRMPD2

Reference allele: G Effect allele: T

Reported: NEW

Source: EUR+EAS

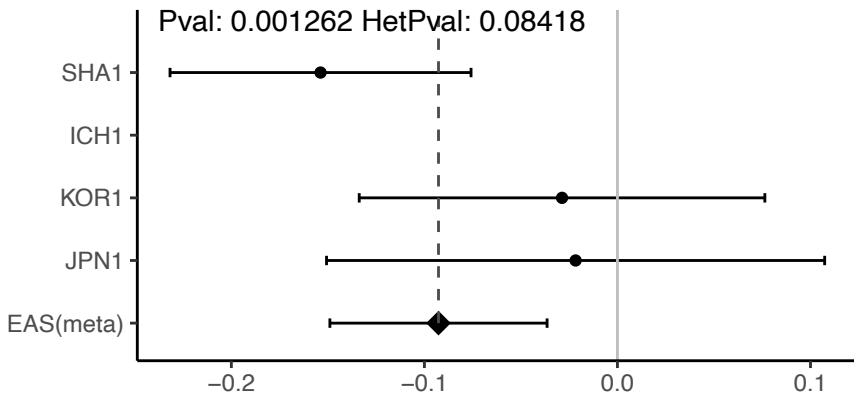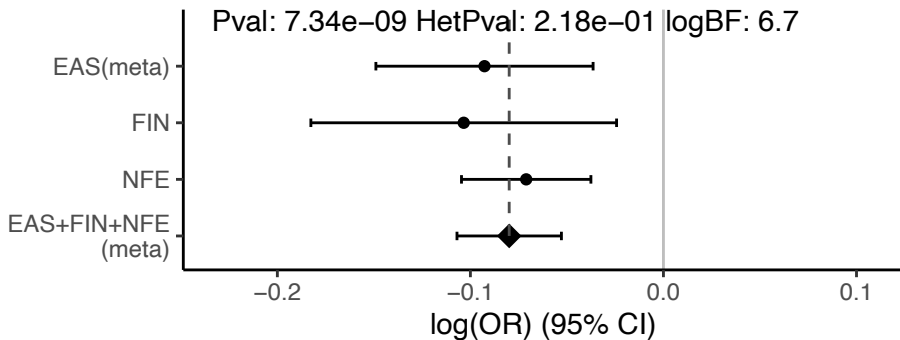

CD

chr10:73903978:A:G rs2688607 PLAU

Reference allele: A Effect allele: G

Reported: NFE

Source: EUR+EAS

Pval: 1.004e-05 HetPval: 0.4945

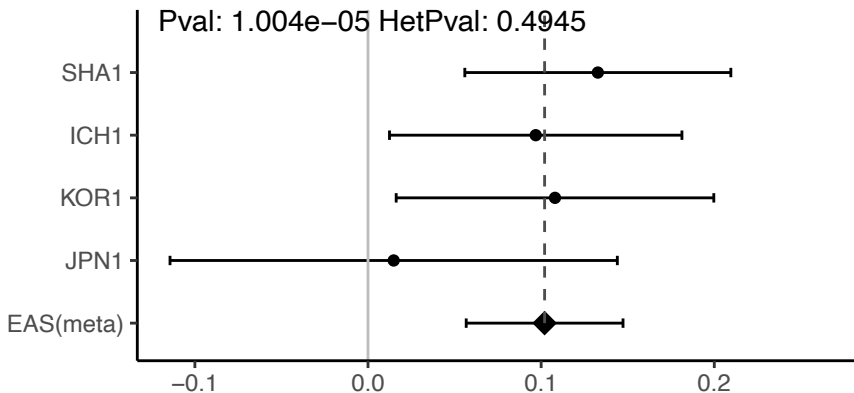

Pval: 5.96e-17 HetPval: 4.03e+01 logBF: 15

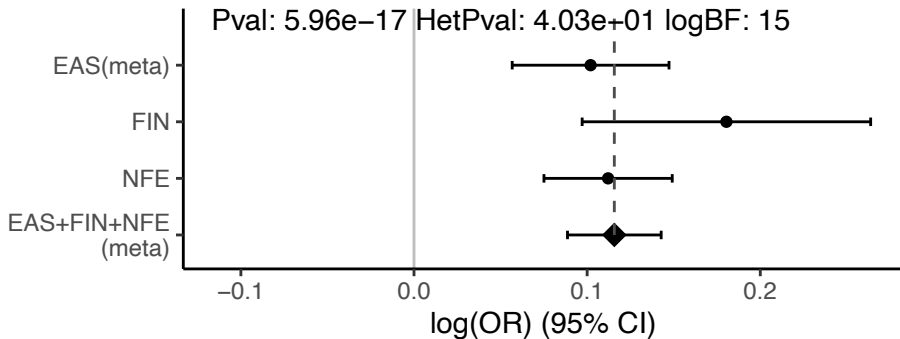



CD

chr10:80511585:G:A rs1870148 TSPAN14

Reference allele: G Effect allele: A

Reported: NFE

Source: EUR+EAS

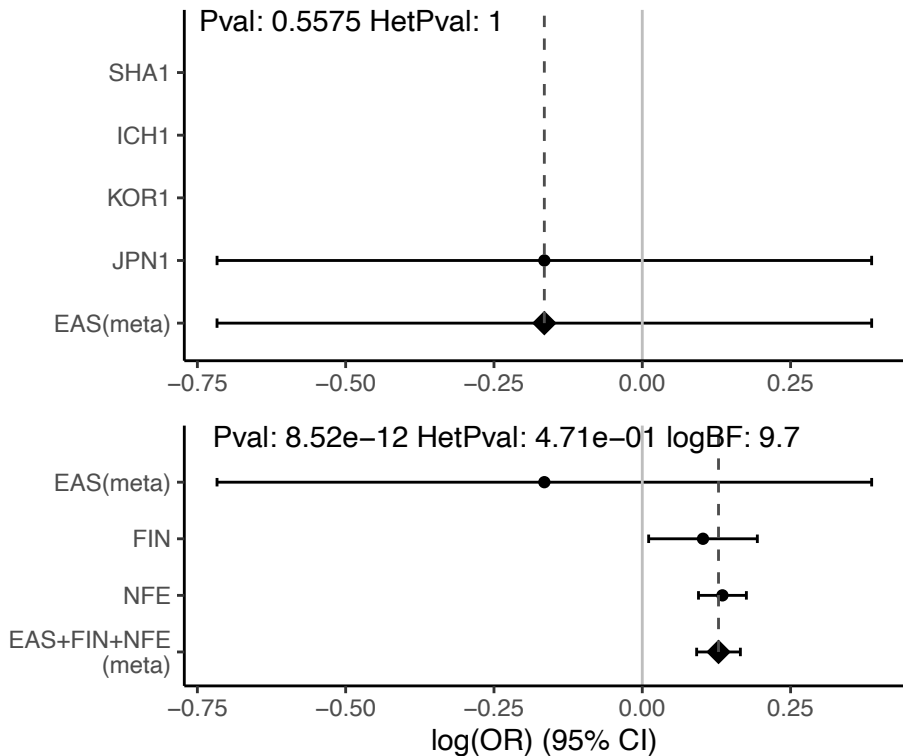

CD

chr10:110425838:G:A rs10884966 DUSP5

Reference allele: G Effect allele: A

Reported: NFE,EAS

Source: EUR+EAS

Pval:  $3.265e-14$  HetPval: 0.1008

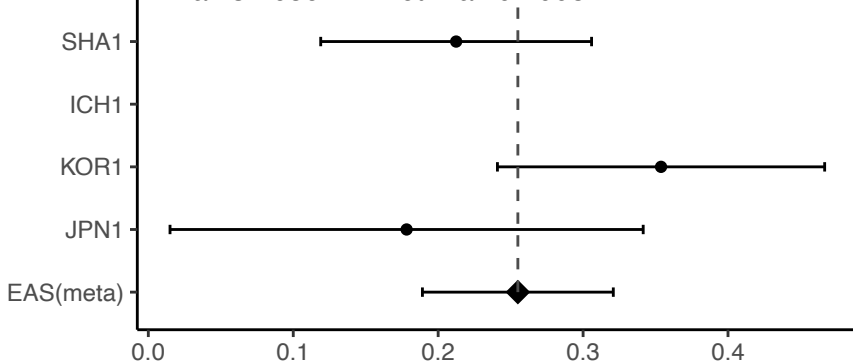

Pval:  $4.65e-22$  HetPval:  $6.26e-04$  logBF: 21

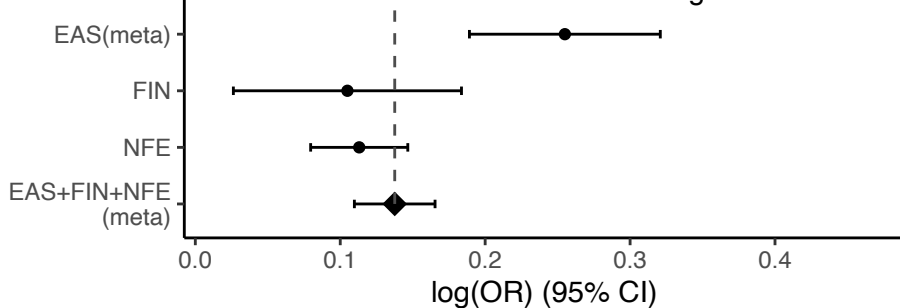

CD

chr11:64338819:T:C rs1783521 CCDC88B

Reference allele: T Effect allele: C

Reported: NFE

Source: EUR+EAS

Pval: 2.626e-05 HetPval: 0.5952

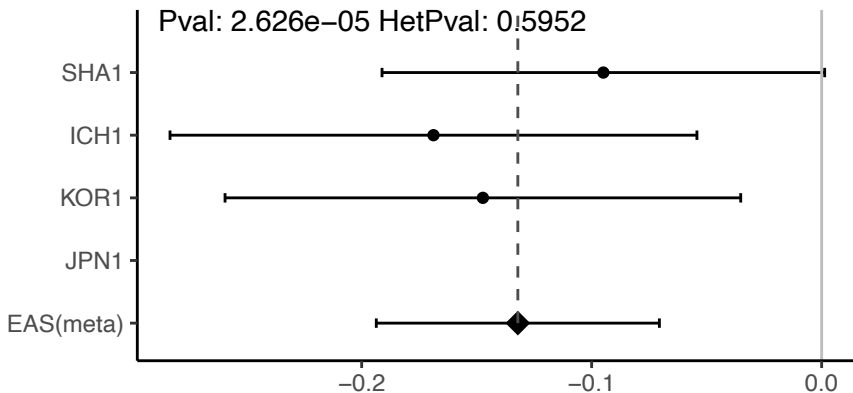

Pval: 1.15e-10 HetPval: 4.21e-01 logBF: 8.6

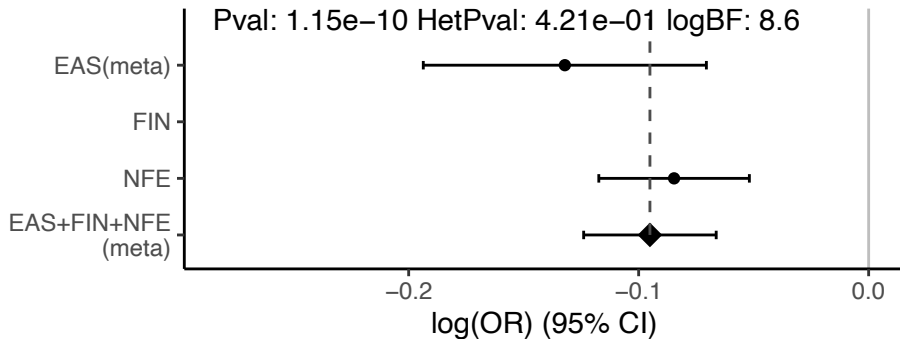

CD

chr11:65873091:G:A rs2303385 EFEMP2

Reference allele: G Effect allele: A

Reported: NFE

Source: EUR+EAS

Pval: 0.00606 HetPval: 0.6963

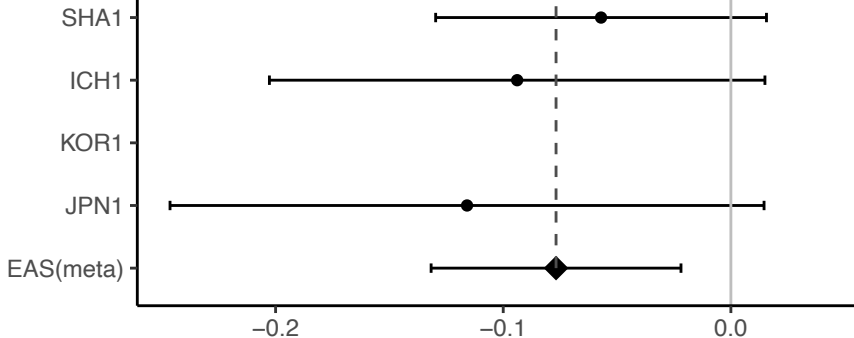

Pval: 3.35e-08 HetPval: 8.46e-01 logBF: 6.2

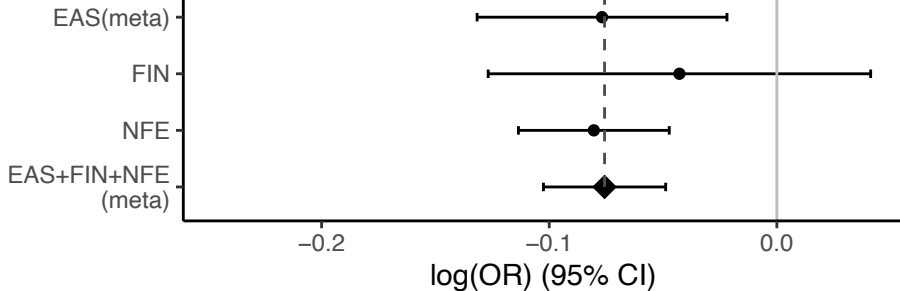

CD

chr11:118273990:A:G rs141340254 MPZL2

Reference allele: A Effect allele: G

Reported: NEW

Source: EUR+EAS

Pval: 4.658e-08 HetPval: 0.325

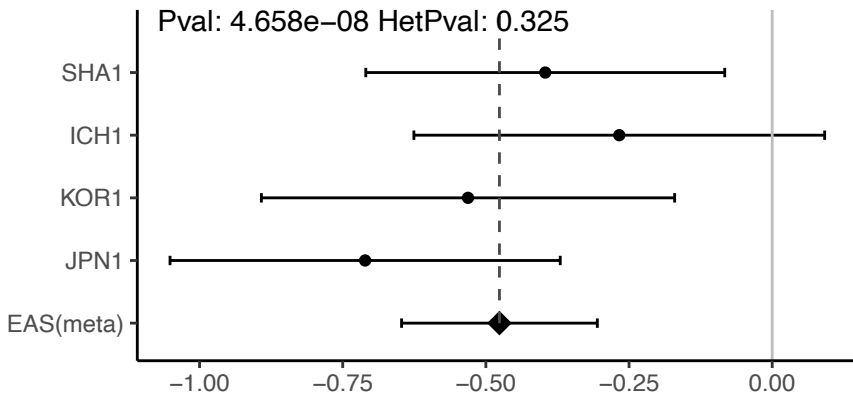

Pval: 4.66e-08 HetPval: 3.25e-01 logBF: 5.9

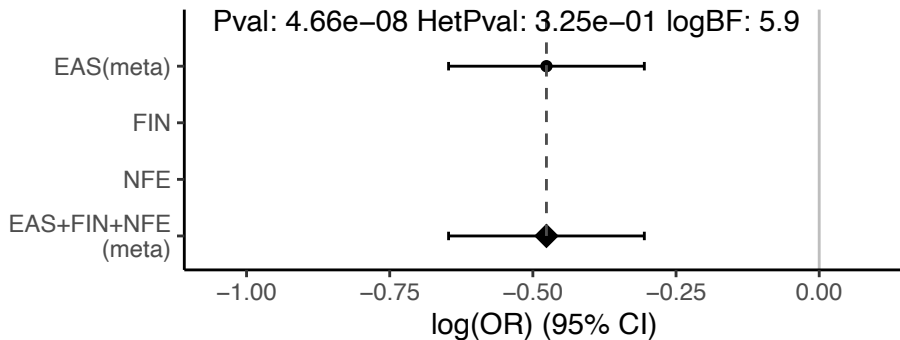

CD

chr12:6402491:G:A rs4020660 LTBR

Reference allele: G Effect allele: A

Reported: NFE

Source: EUR+EAS

Pval: 0.0001833 HetPval: 0.7096

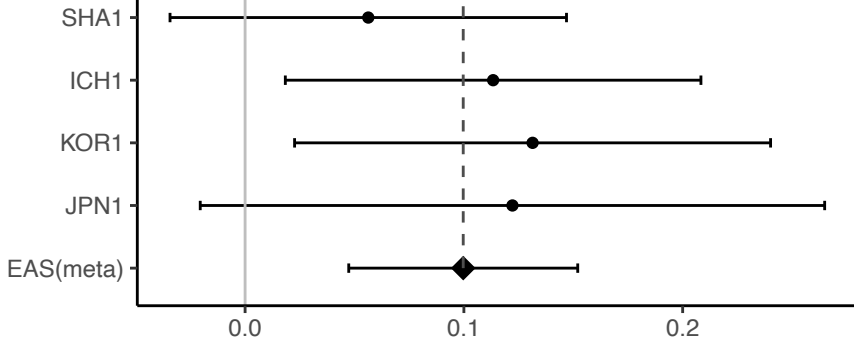

Pval: 4.09e-11 HetPval: 8.5e-01 logBF: 9

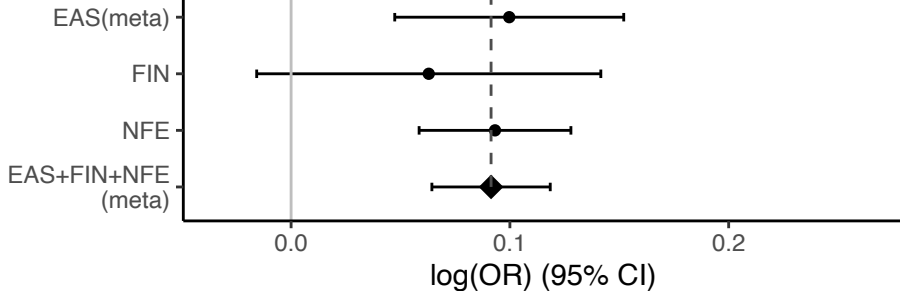

CD

chr12:40562563:T:C rs75913487 RNU6-713P

Reference allele: T Effect allele: C

Reported: NFE

Source: EUR+EAS

Pval: - HetPval: -

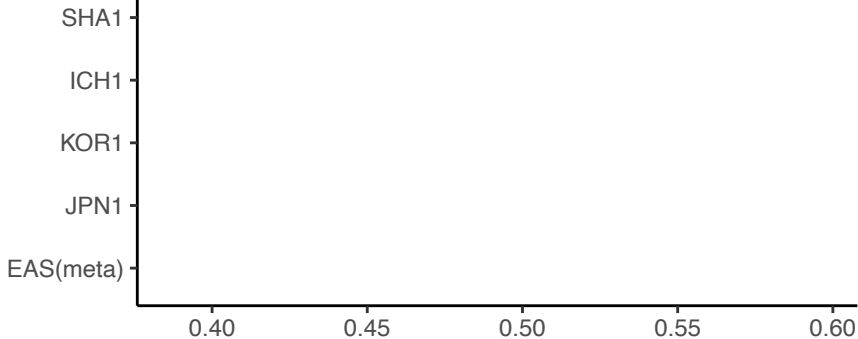

Pval:  $6.07e-20$  HetPval:  $1e+00$  logBF: 18

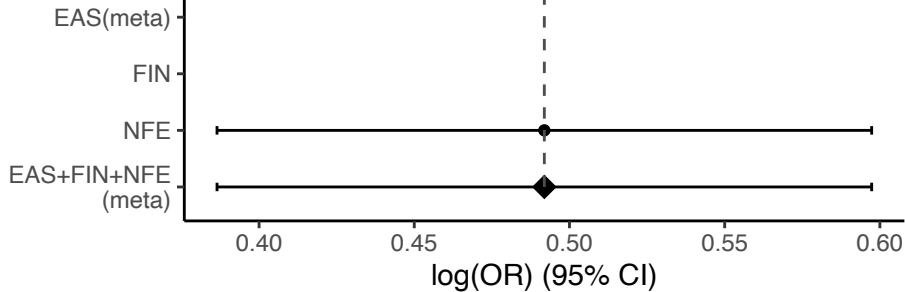

# CD

chr12:96137691:A:G rs4762271 ELK3

Reference allele: A Effect allele: G

Reported: NEW

Source: EUR+EAS

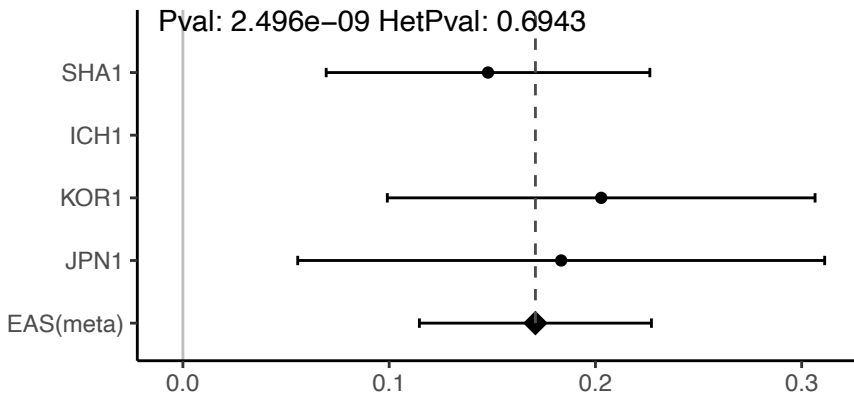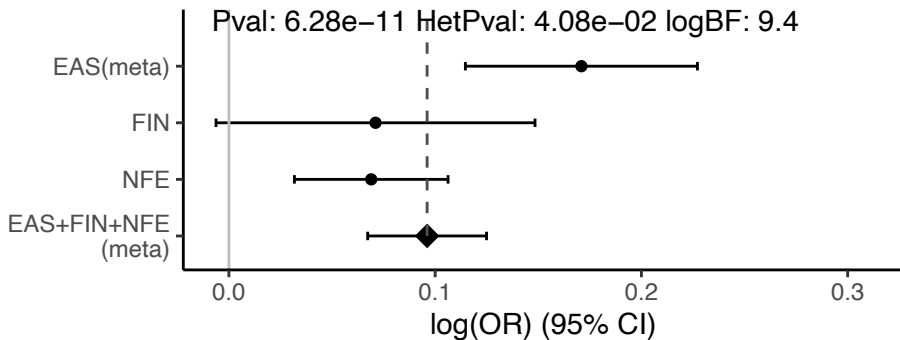



# CD

chr12:110259525:G:A rs117121174 ATP2A2

Reference allele: G Effect allele: A

Reported: NEW

Source: EUR+EAS

Pval:  $1.346e-10$  HetPval: 0.7832

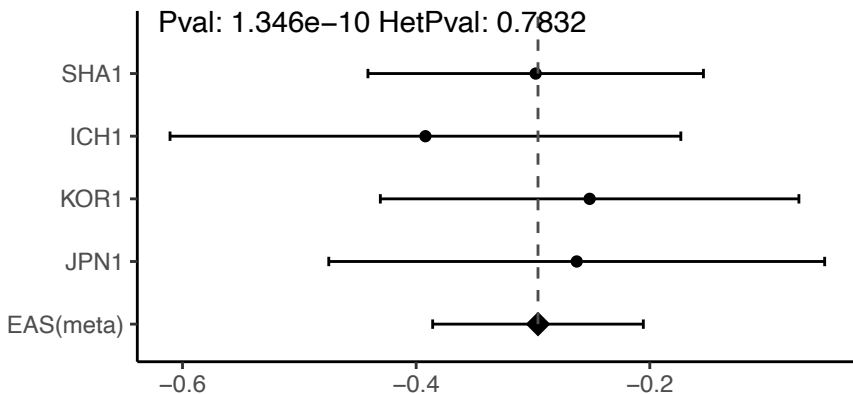

Pval:  $1.35e-10$  HetPval:  $7.83e-01$  logBF: 8.6

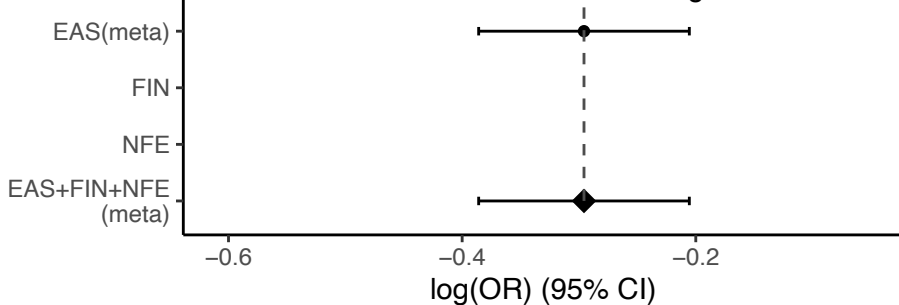

CD

chr13:42037531:C:A rs9525562 DGKH

Reference allele: C Effect allele: A

Reported: NFE

Source: EUR+EAS

Pval: 3.232e-07 HetPval: 0.5501

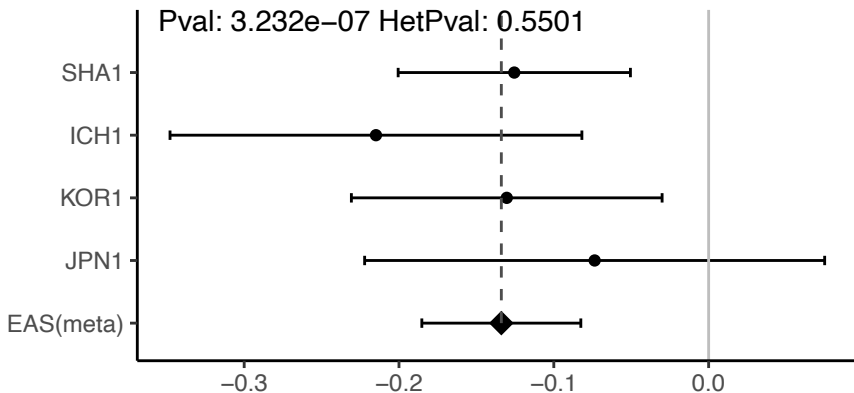

Pval: 1.39e-11 HetPval: 3.16e+01 logBF: 9.5

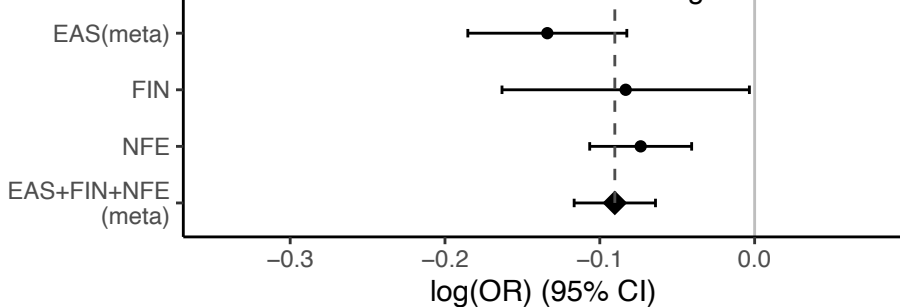

CD

chr13:43901262:A:G rs1373904 LACC1

Reference allele: A Effect allele: G

Reported: NFE

Source: EUR+EAS

Pval: 6.958e-18 HetPval: 0.4011

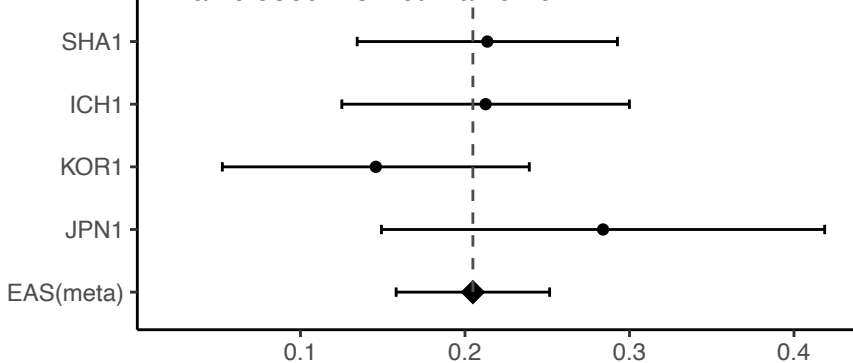

Pval: 3.63e-30 HetPval: 1.43e-01 logBF: 28

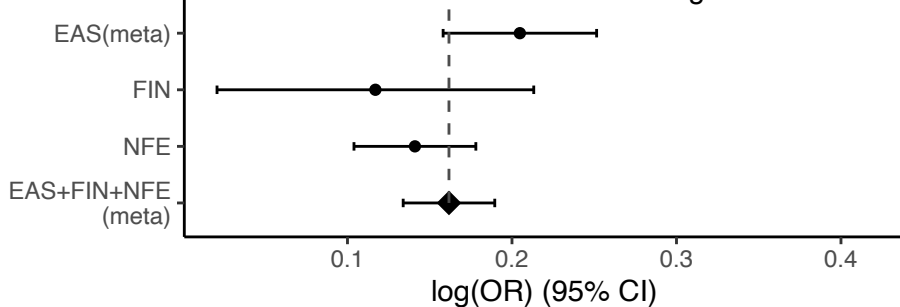

CD

chr14:35390868:C:T rs743228 NFKBIA

Reference allele: C Effect allele: T

Reported: EAS

Source: EUR+EAS

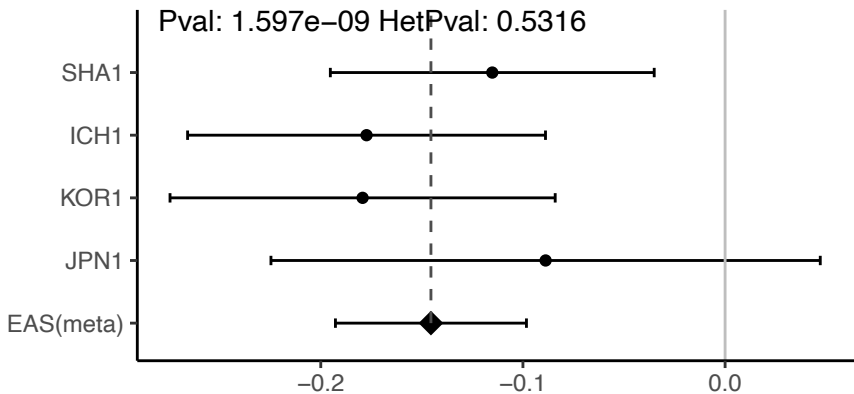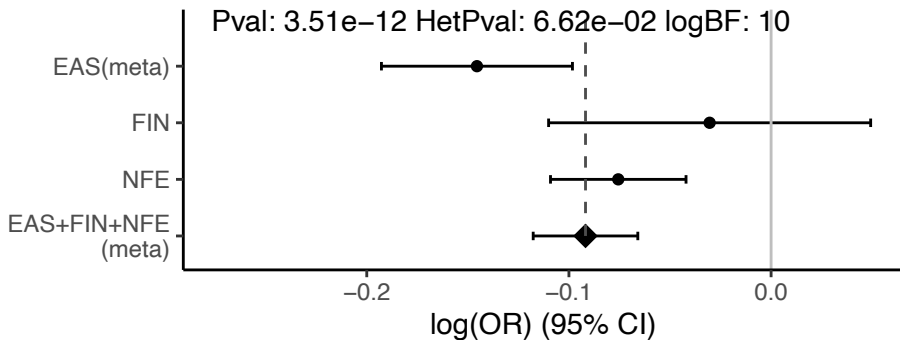

CD

chr15:38617263:A:C rs147034755 RASGRP1

Reference allele: A Effect allele: C

Reported: NFE

Source: EUR+EAS

Pval: 0.002305 HetPval: 0.5804

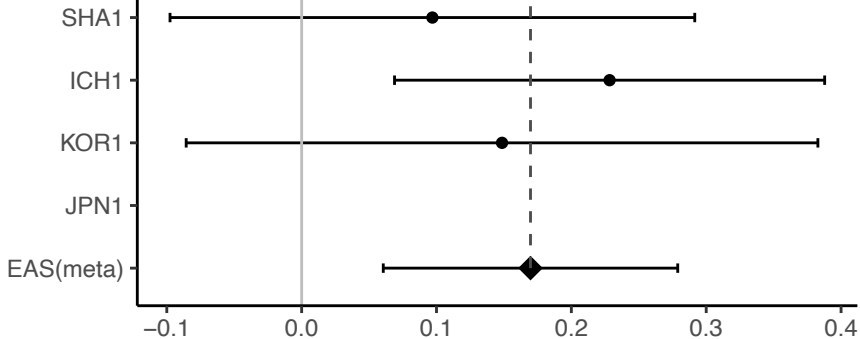

Pval: 2.63e-09 HetPval: 5.78e-01 logBF: 7.3

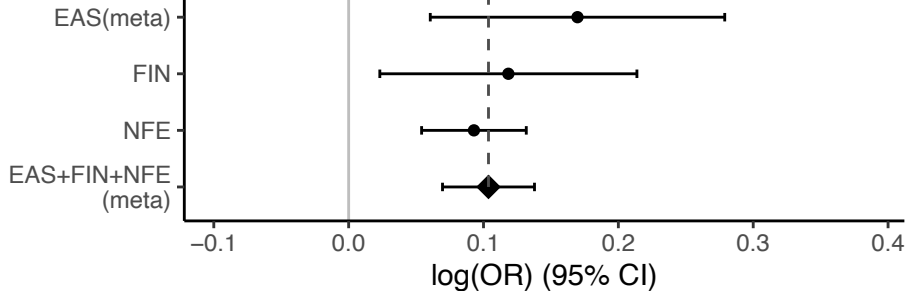

CD

chr15:100948377:T:C rs7170683 LRRK1

Reference allele: T Effect allele: C

Reported: EAS

Source: EUR+EAS

Pval: 0.0008019 HetPval: 0.8695

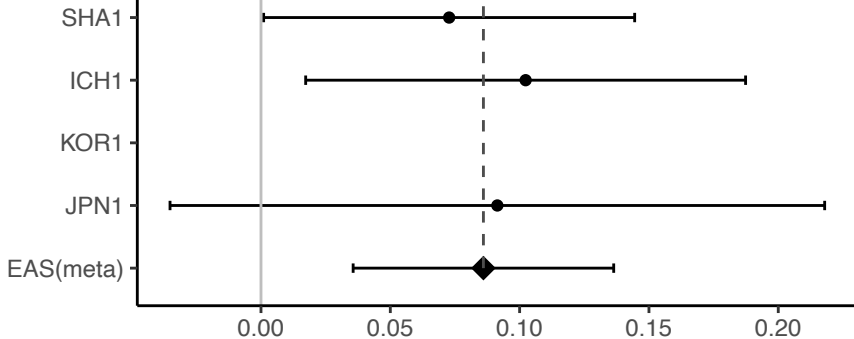

Pval: 4.8e-08 HetPval: 9.34e-01 logBF: 5.5

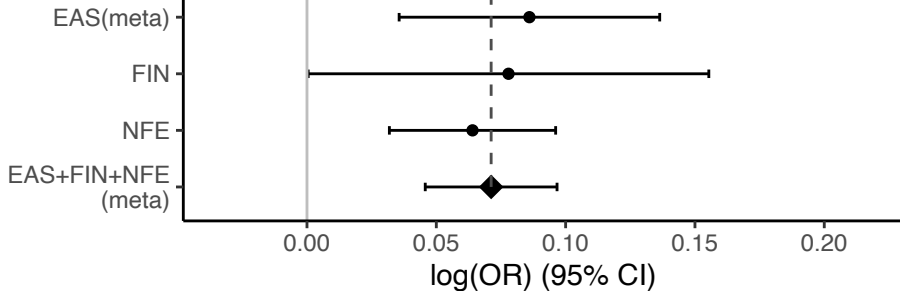

CD

chr16:50722863:C:T rs5743289 NOD2

Reference allele: C Effect allele: T

Reported: NFE

Source: EUR+EAS

Pval: - HetPval: -

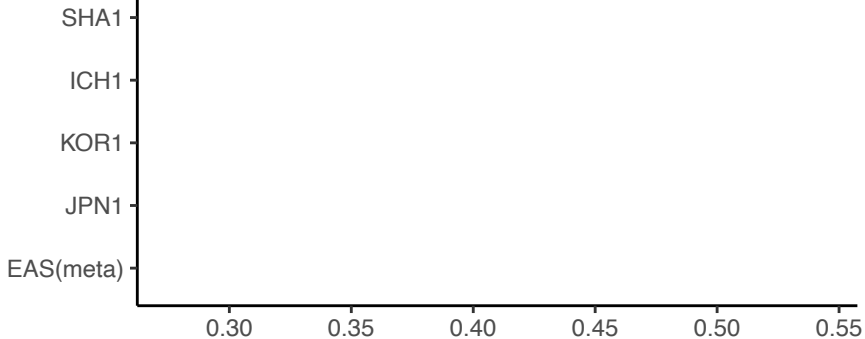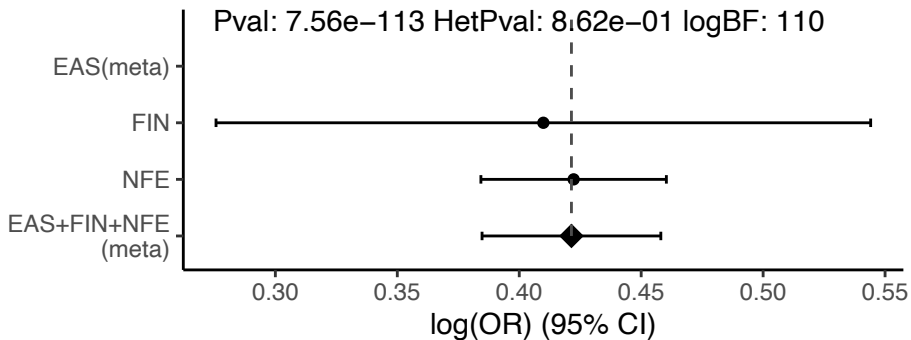

# CD

chr16:82844608:GA:G rs76640285 CDH13

Reference allele: GA Effect allele: G

Reported: NFE

Source: EUR+EAS

Pval: - HetPval: -

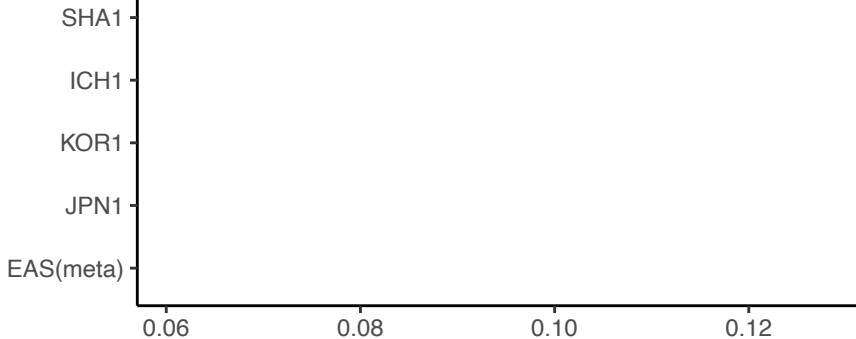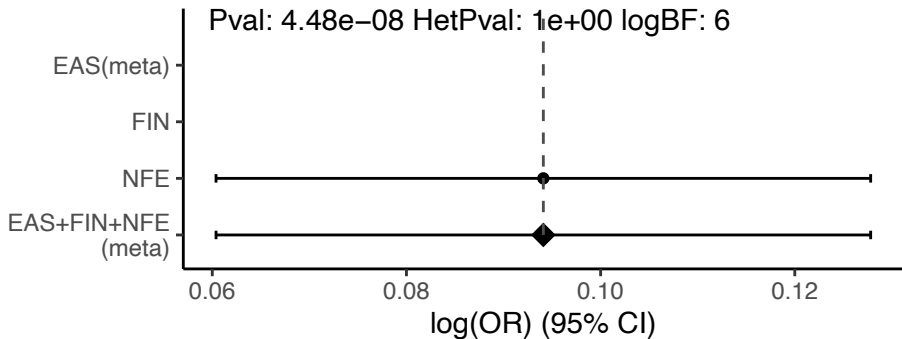



# CD

chr17:1453285:C:A rs16946807 CRK

Reference allele: C Effect allele: A

Reported: NEW

Source: EUR+EAS

Pval:  $6.958 \times 10^{-6}$  HetPval: 0.739

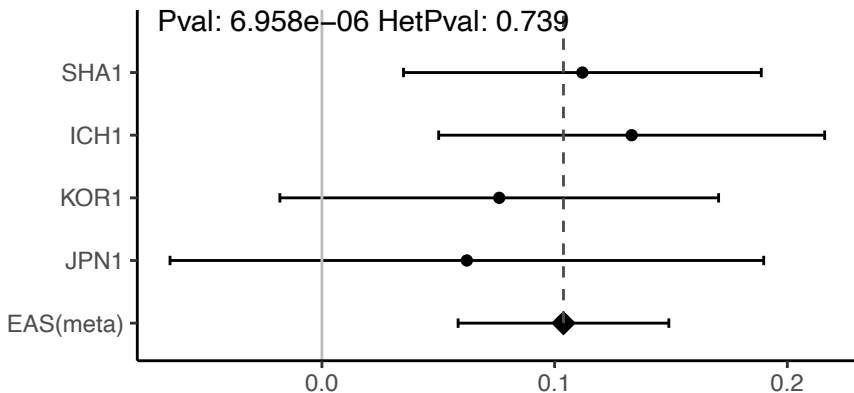

Pval:  $2.45 \times 10^{-8}$  HetPval:  $5.34 \times 10^{-1}$  logBF: 6.3

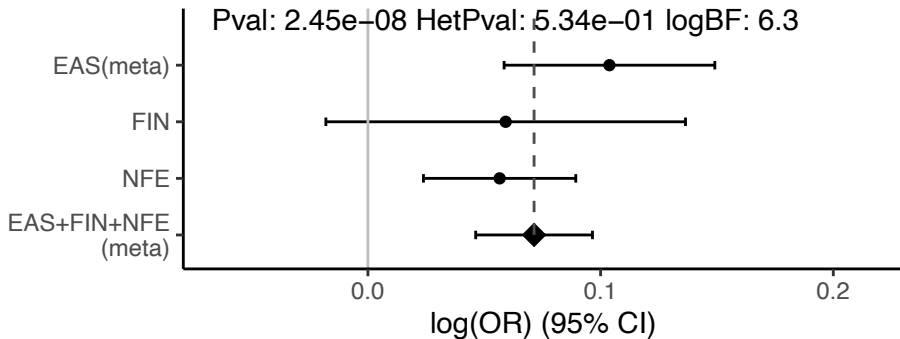

CD

chr17:27529460:A:G rs2948542 KSR1

Reference allele: A Effect allele: G

Reported: NFE

Source: EUR+EAS

Pval: 6.222e-07 HetPval: 0.5597

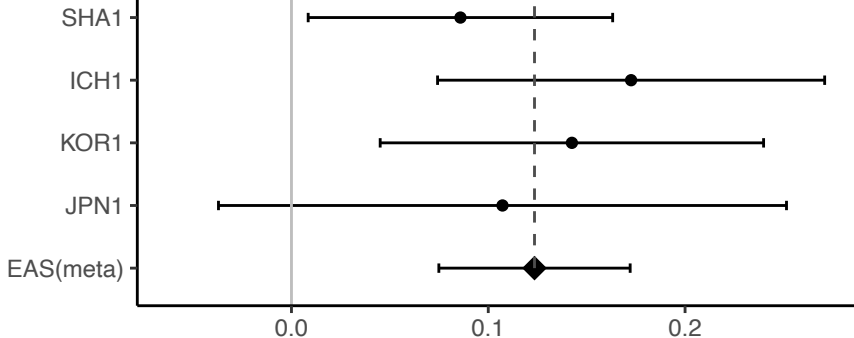

Pval: 1.63e-14 HetPval: 2.19e-01 logBF: 12

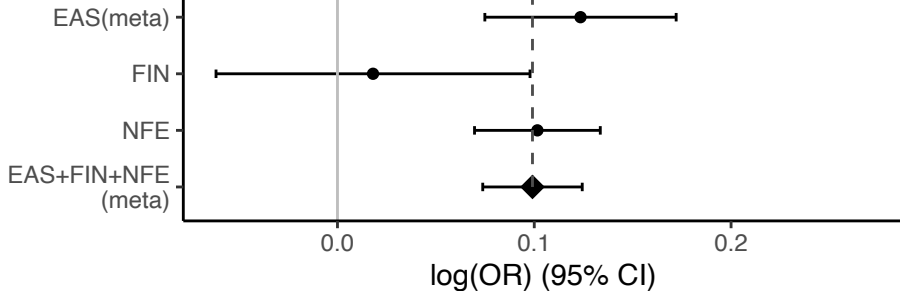

CD

chr17:47259971:T:G rs4598971 ITGB3

Reference allele: T Effect allele: G

Reported: NEW

Source: EUR+EAS

Pval: 2.859e-08 HetPval: 0.05203

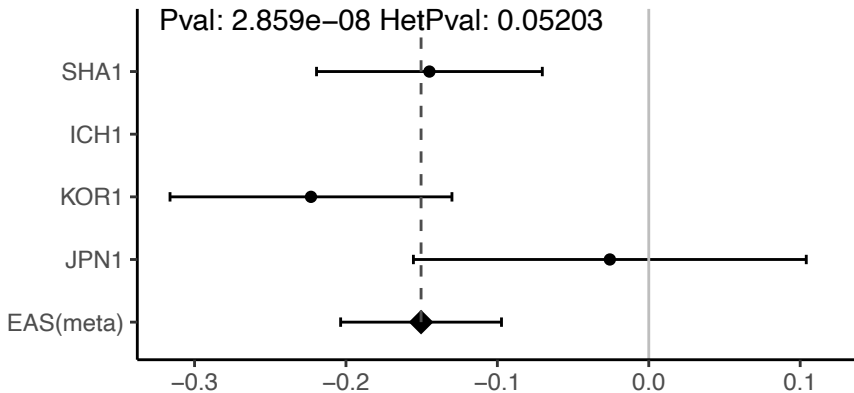

Pval: 3.13e-01 HetPval: 4.17e-08 logBF: 7

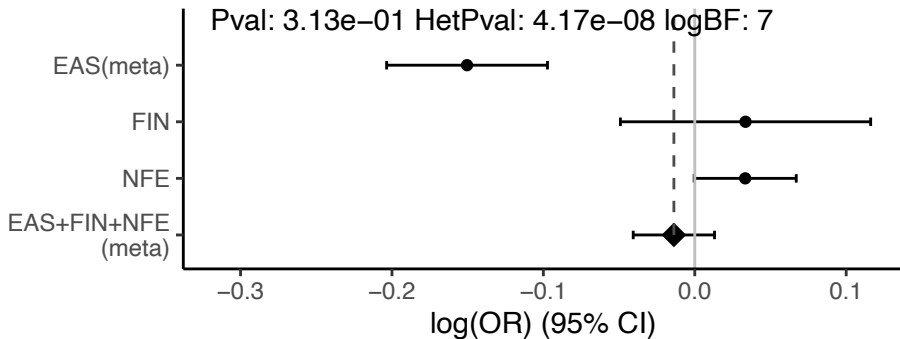

# CD

chr18:44806588:T:C rs16978179 SETBP1

Reference allele: T Effect allele: C

Reported: NEW

Source: EUR+EAS

Pval:  $8.717e-09$  HetPval: 0.6108

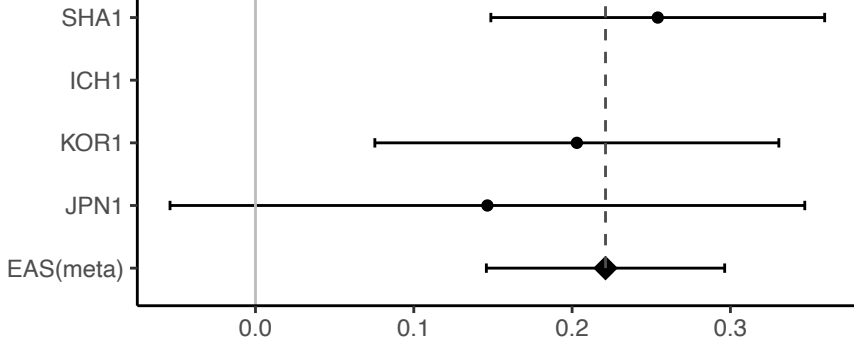

Pval:  $1.25e-13$  HetPval:  $2.25e-01$  logBF: 12

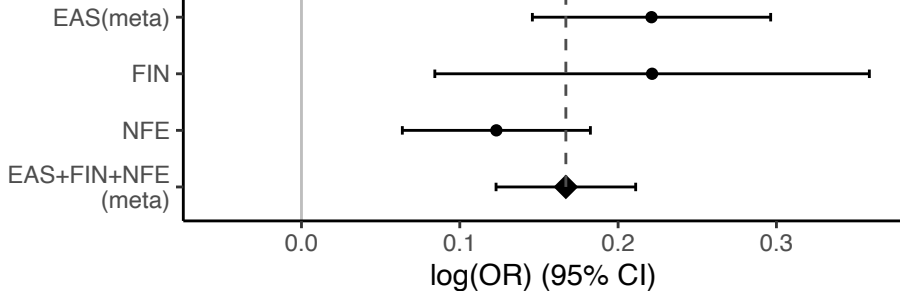

# CD

chr19:3548233:A:G rs2240751 MFSD12

Reference allele: A Effect allele: G

Reported: EAS

Source: EUR+EAS

Pval: 5.039e-09 HetPval: 0.08328

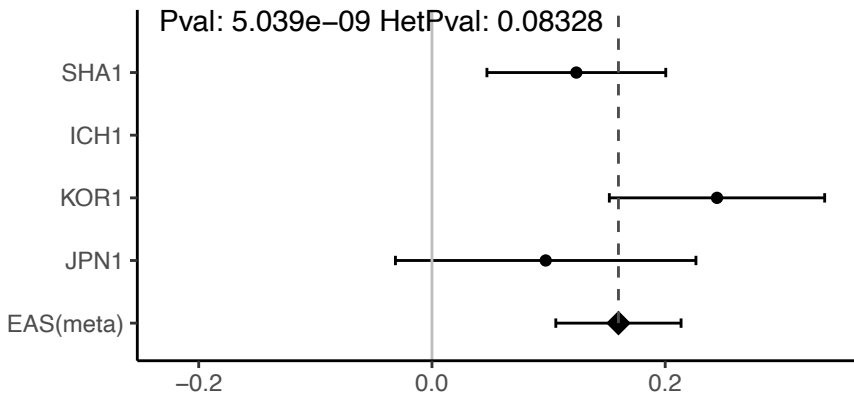

Pval: 5.96e-08 HetPval: 3.09e-02 logBF: 6

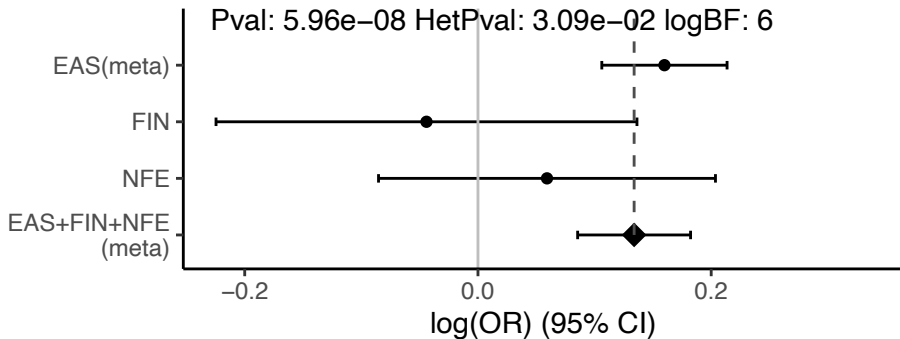

CD

chr19:18522945:T:C rs172032 ELL

Reference allele: T Effect allele: C

Reported: NEW

Source: EUR+EAS

Pval: 0.001483 HetPval: 0.7474

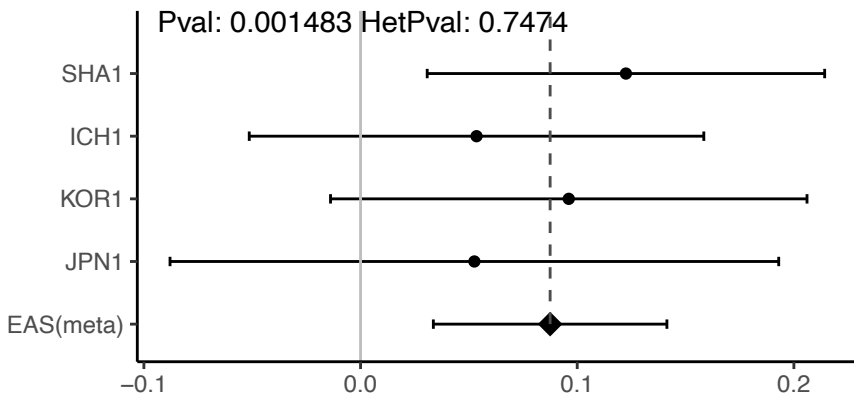

Pval: 7.33e-09 HetPval: 9.07e-01 logBF: 6.6

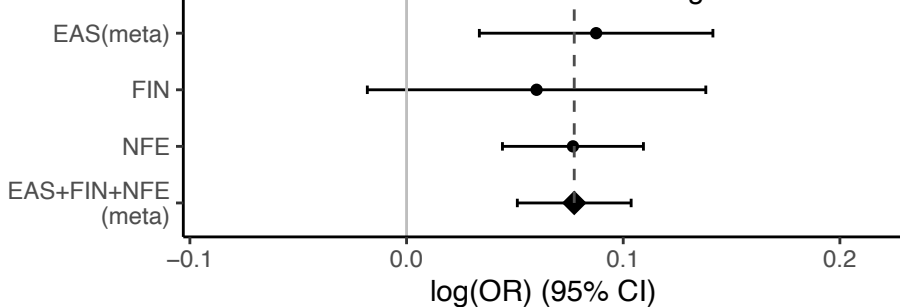

CD

chr19:36991870:G:A rs1644682 ZNF568

Reference allele: G Effect allele: A

Reported: NEW

Source: EUR+EAS

Pval: 0.00761 HetPval: 0.1767

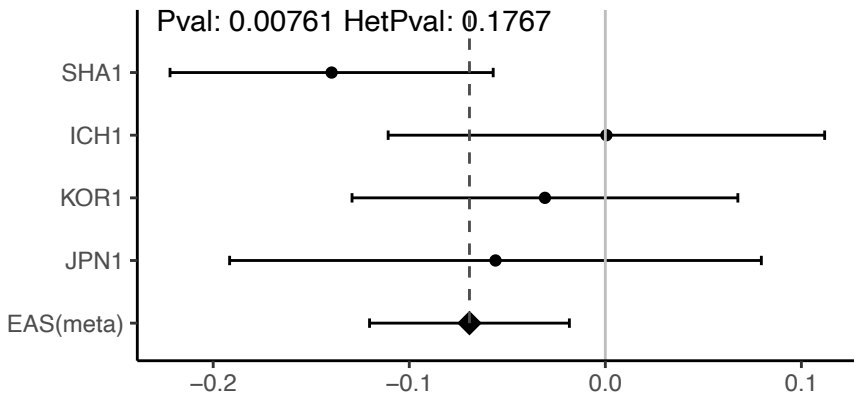

Pval: 5.58e-09 HetPval: 4.16e-01 logBF: 6.9

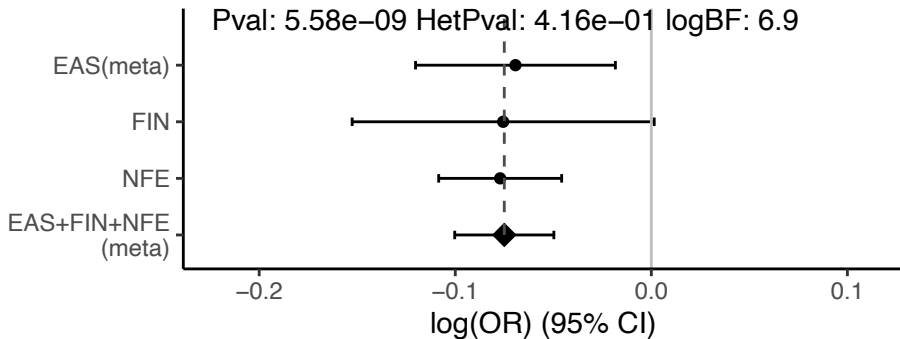

CD

chr19:46346189:A:G rs55665939 PPP5C

Reference allele: A Effect allele: G

Reported: NFE

Source: EUR+EAS

Pval: 0.0001346 HetPval: 0.1107

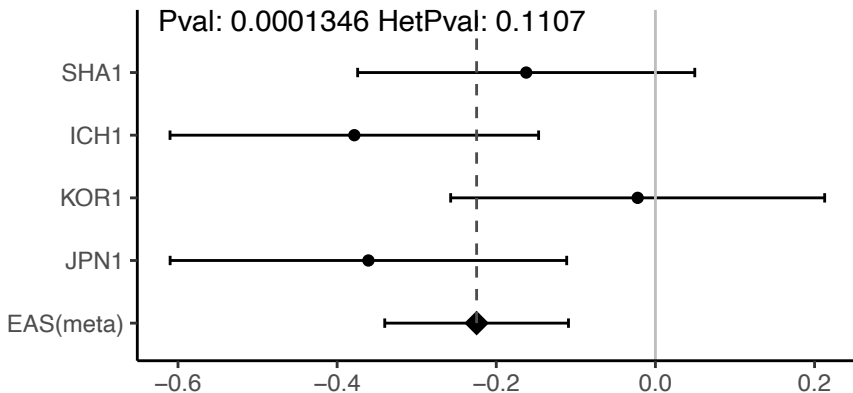

Pval: 2.55e-09 HetPval: 2.85e-02 logBF: 7.6

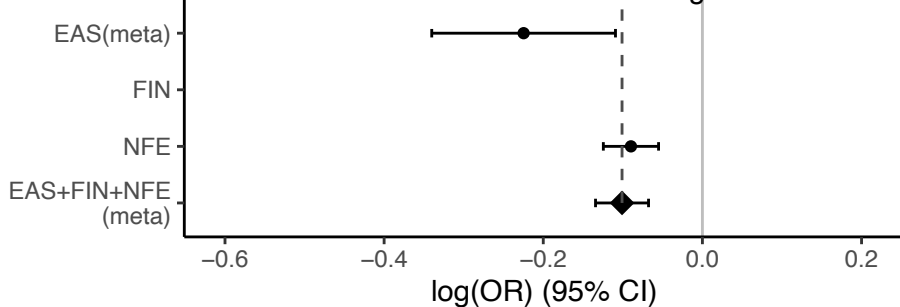



# CD

chr19:48706594:A:G rs646327 FUT2

Reference allele: A Effect allele: G

Reported: NFE

Source: EUR+EAS

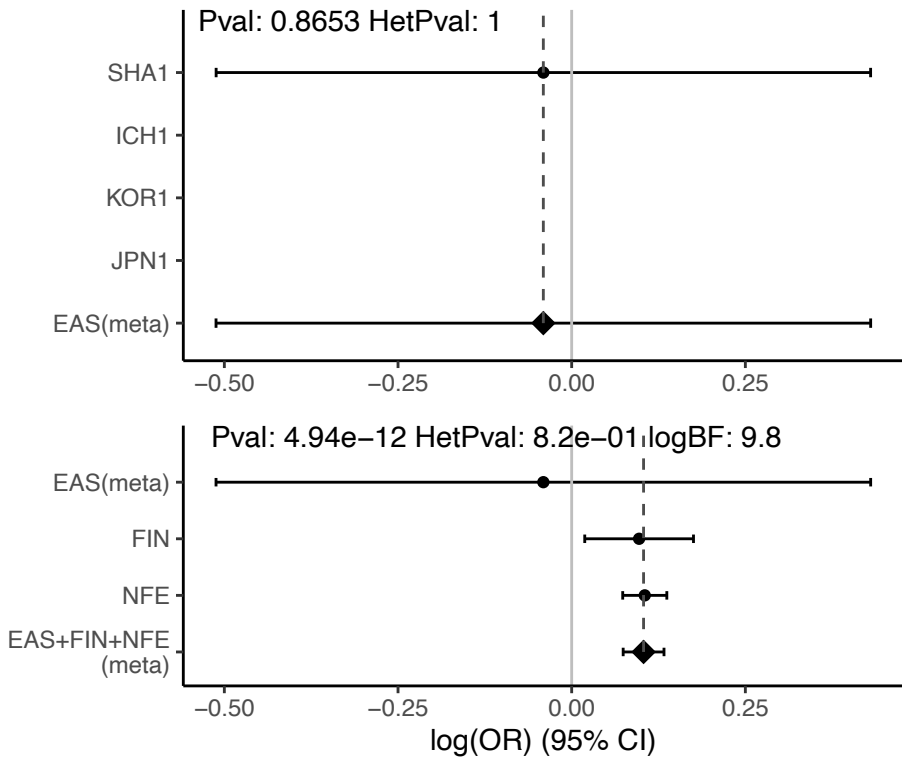

CD

chr19:54203491:G:A rs34587409 RPS9

Reference allele: G Effect allele: A

Reported: NEW

Source: EUR+EAS

Pval: 2.562e-08 HetPval: 0.9768

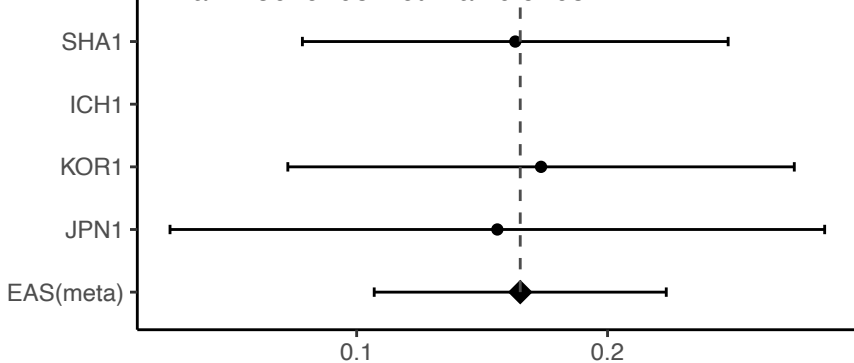

Pval: 7.13e-11 HetPval: 4.28e-02 logBF: 9.2

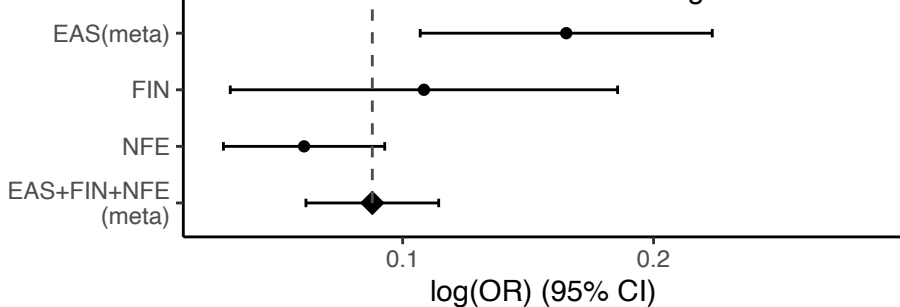

# CD

chr20:14618543:C:A rs6042824 MACROD2

Reference allele: C Effect allele: A

Reported: NEW

Source: EUR+EAS

Pval: 0.03114 HetPval: 0.6291

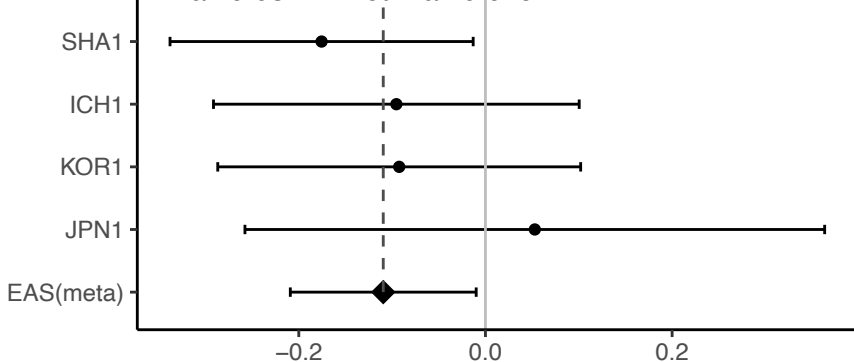

Pval: 1.1e-08 HetPval: 6.96e-01 logBF: 6.6

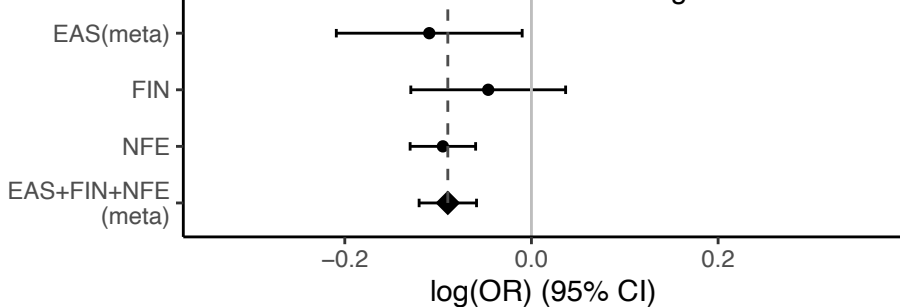

# CD

chr20:46118343:T:C rs1883832 CD40

Reference allele: T Effect allele: C

Reported: NFE

Source: EUR+EAS

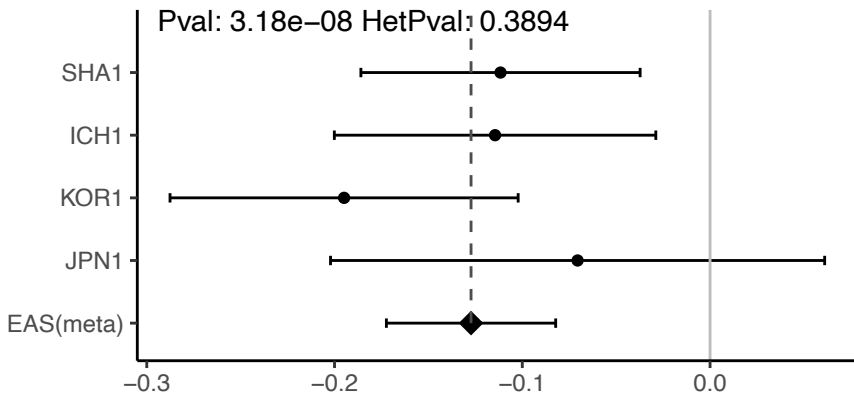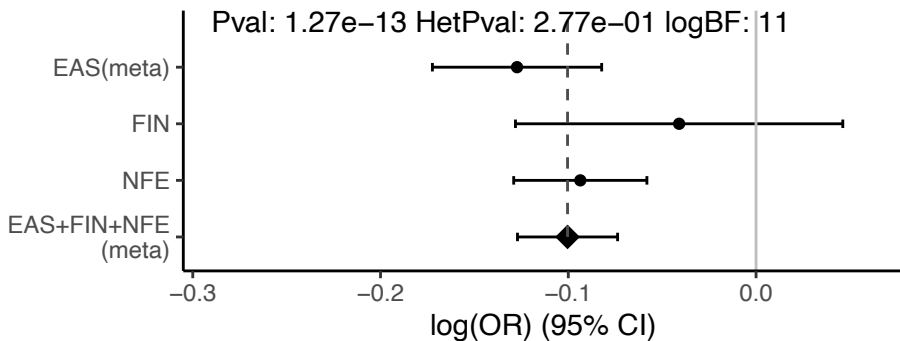

CD

chr21:33404389:A:G rs2284553 IFNGR2

Reference allele: A Effect allele: G

Reported: NFE

Source: EUR+EAS

Pval: 0.0008399 HetPval: 0.2594

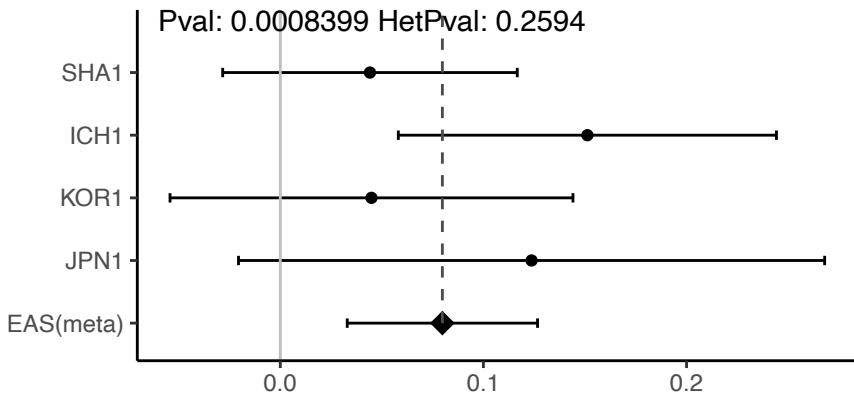

Pval: 1.84e-17 HetPval: 2.11e-01 logBF: 15

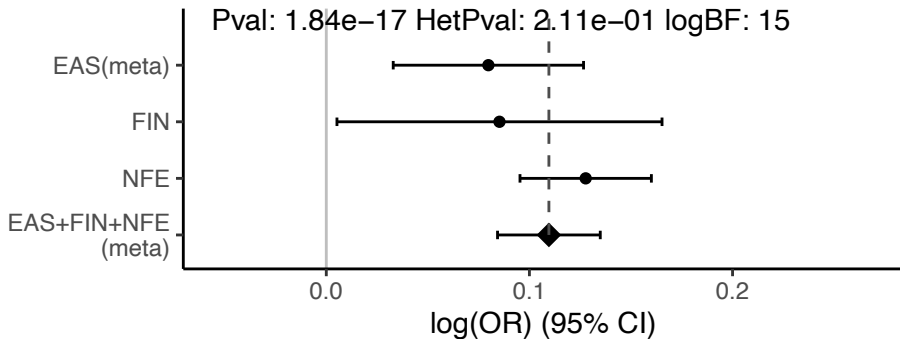

# CD

chr22:36908468:A:T rs2413430 CSF2RB

Reference allele: A Effect allele: T

Reported: NFE,EAS

Source: EUR+EAS

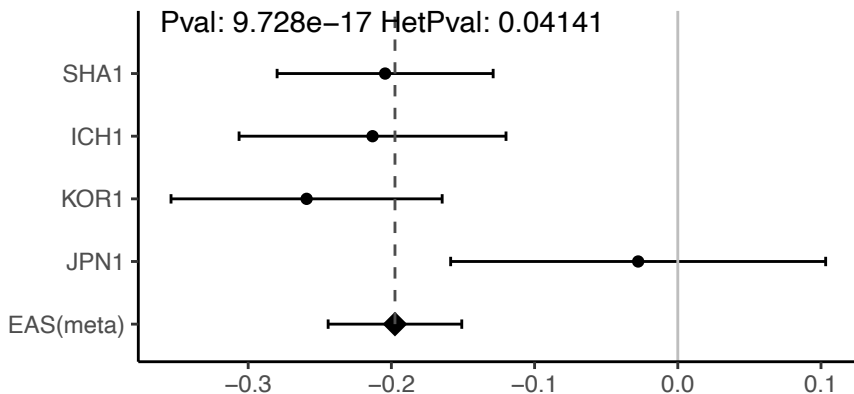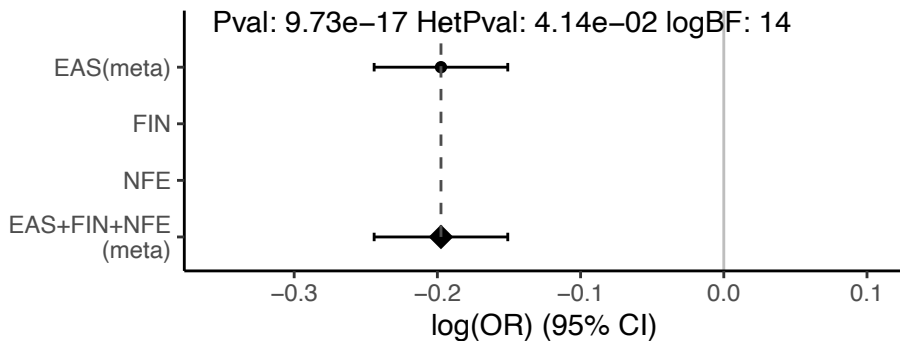

# UC

chr1:2557169:T:C rs1886730 TNFRSF14

Reference allele: T Effect allele: C

Reported: NFE

Source: EUR+EAS

Pval: 5.893e-07 HetPval: 0.3866

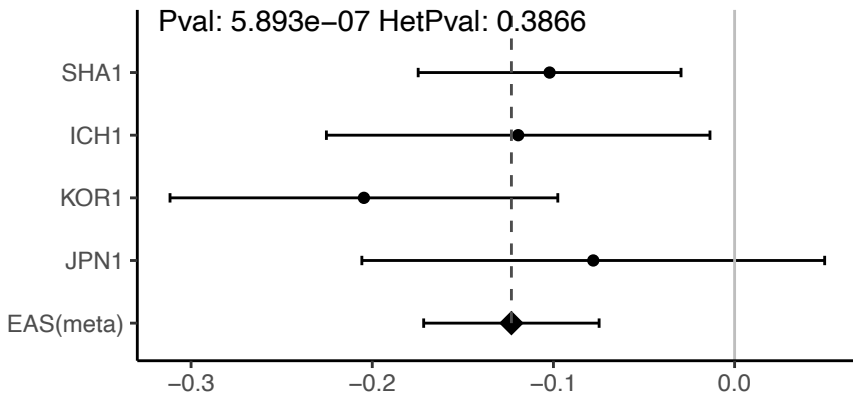

Pval: 6e-16 HetPval: 5.38e-02 logBF: 13

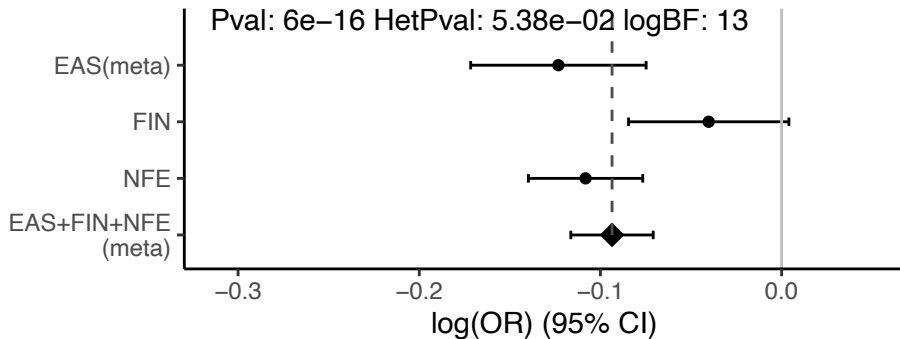

# UC

chr1:19845367:G:A rs6426833 RNF186

Reference allele: G Effect allele: A

Reported: NFE,EAS

Source: EUR+EAS

Pval:  $6.297e-22$  HetPval: 0.01097

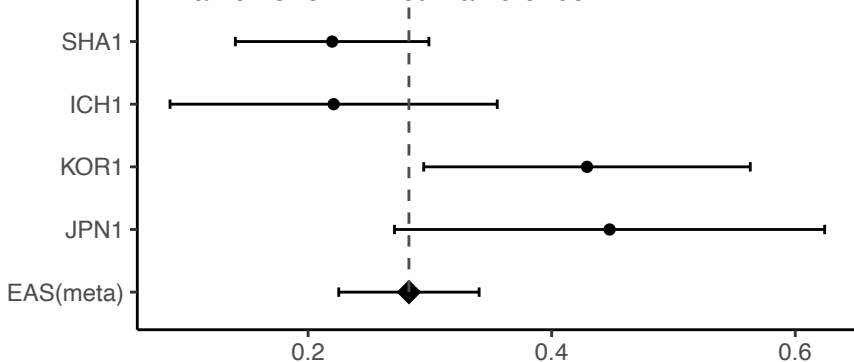

Pval:  $1.48e-74$  HetPval:  $1.71e-03$  logBF: 72

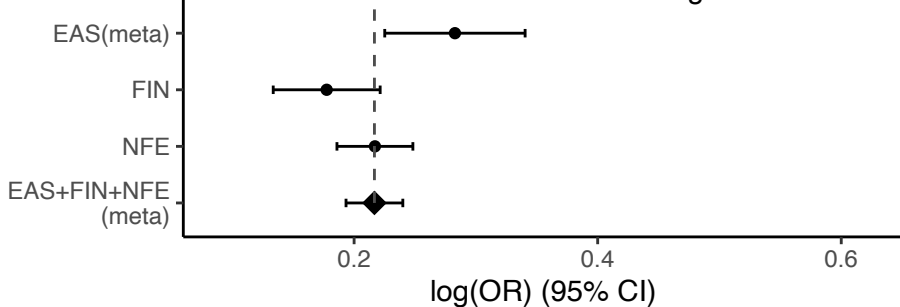



# UC

chr1:33337547:C:T rs12138864 PHC2

Reference allele: C Effect allele: T

Reported: NEW

Source: EUR+EAS

Pval: 0.0001453 HetPval: 0.5951

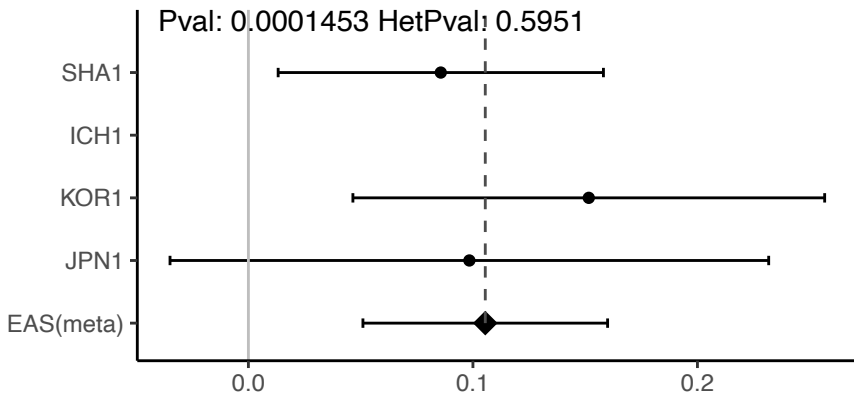

Pval: 3.98e-08 HetPval: 3.92e-01 logBF: 6

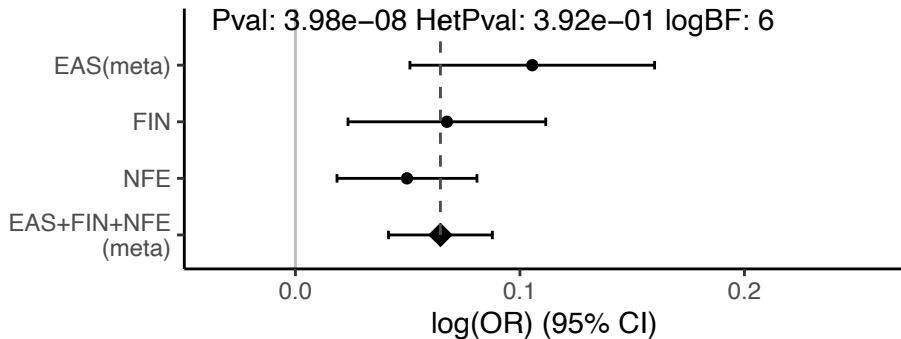

# UC

chr1:56454342:C:T rs6687307 PLPP3

Reference allele: C Effect allele: T

Reported: NEW

Source: EUR+EAS

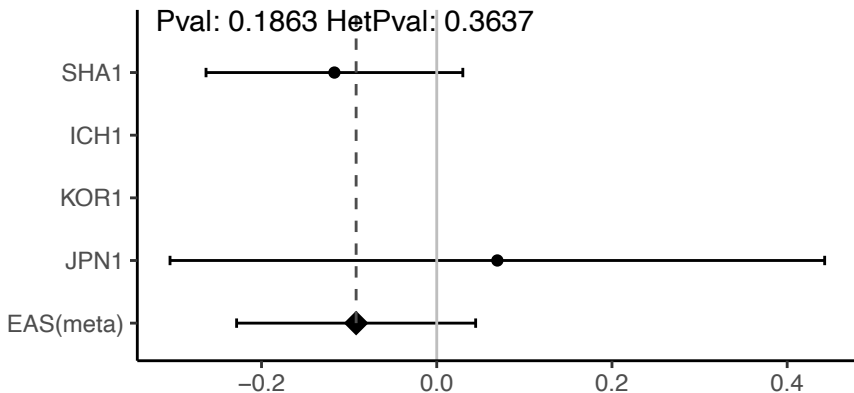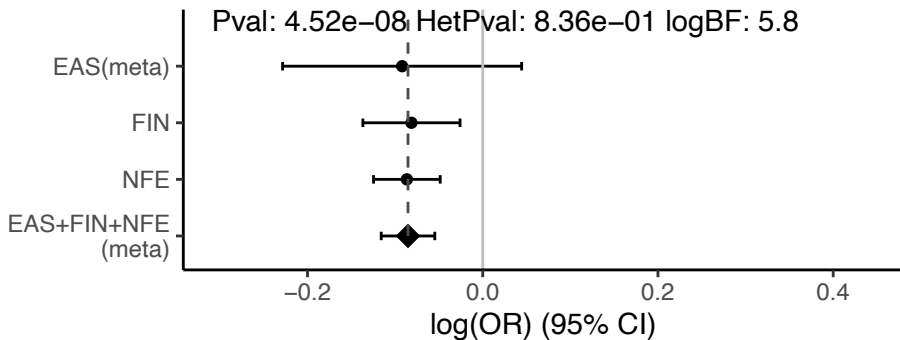

# UC

chr1:70567336:A:C rs7552319 CHORDC1P5

Reference allele: A Effect allele: C

Reported: NFE

Source: EUR+EAS

Pval: 0.1762 HetPval: 0.01208

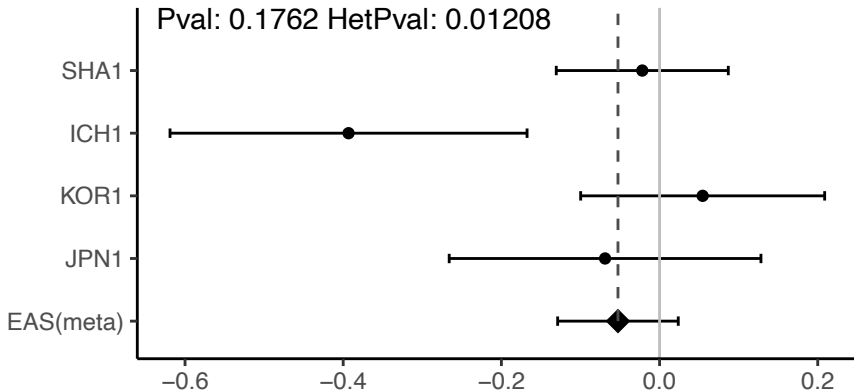

Pval: 6.66e-09 HetPval: 3.47e-02 logBF: 6.9

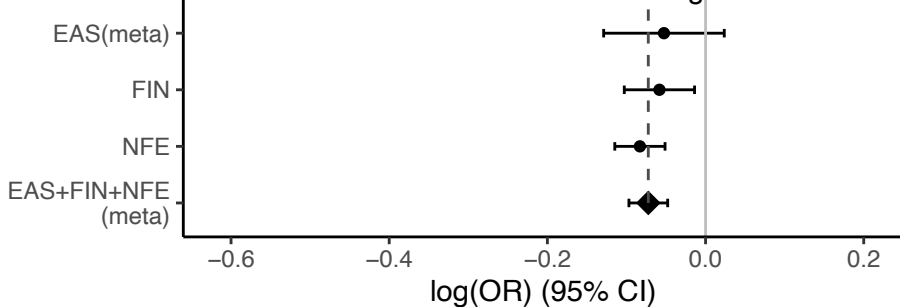

# UC

chr1:161499264:G:C rs6658353 FCGR2A

Reference allele: G Effect allele: C

Reported: NFE,EAS

Source: EUR+EAS

Pval:  $1.32e-06$  HetPval: 0.02432

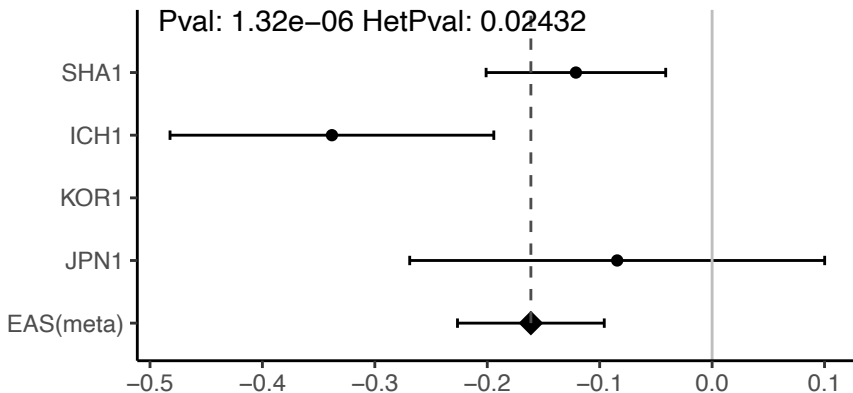

Pval:  $3.29e-39$  HetPval:  $1.13e-01$  logBF: 37

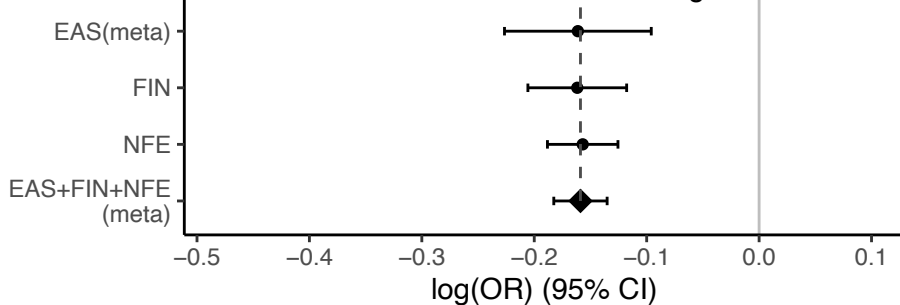

UC

chr1:200108907:G:T rs2816980 NR5A2

Reference allele: G Effect allele: T

Reported: NFE

Source: EUR+EAS

Pval: 0.7778 HetPval: 1

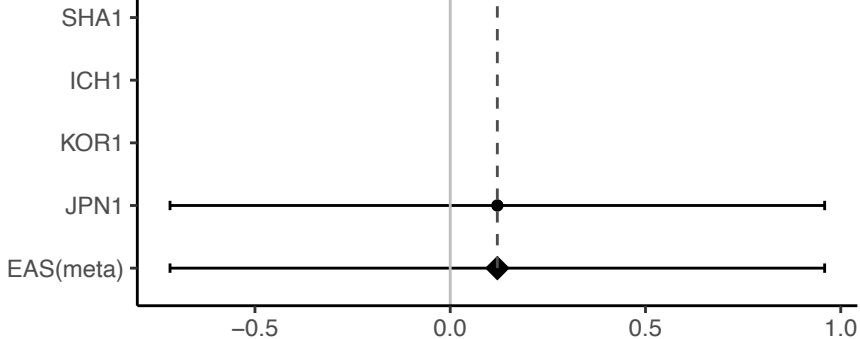

Pval:  $3.25e-12$  HetPval:  $8.53e-03$  logBF: 11

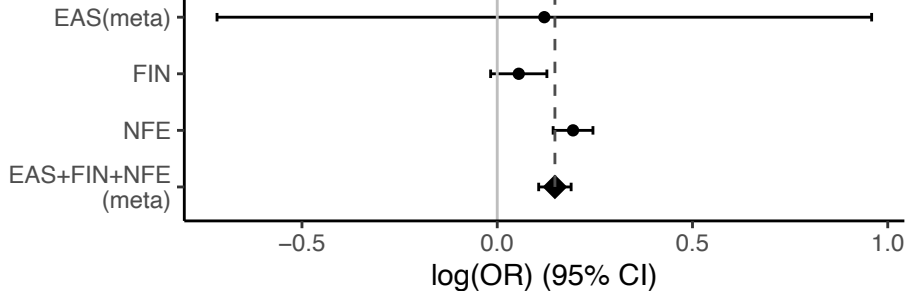

# UC

chr1:205516162:T:A rs11240504 CDK18

Reference allele: T Effect allele: A

Reported: NEW

Source: EUR+EAS

Pval: 0.1153 HetPval: 0.1698

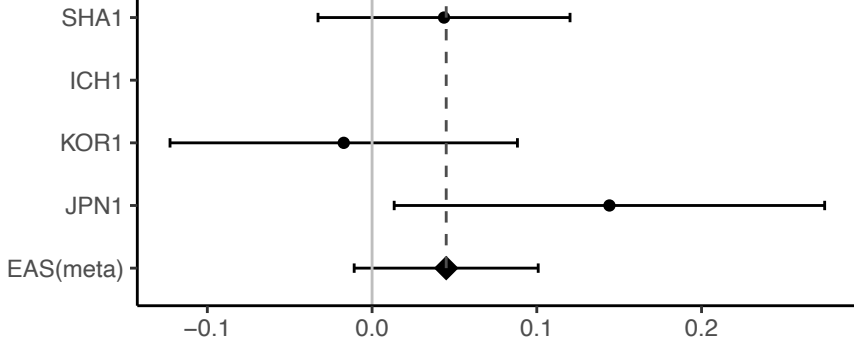

Pval: 2.37e-08 HetPval: 3.02e-01 logBF: 6.2

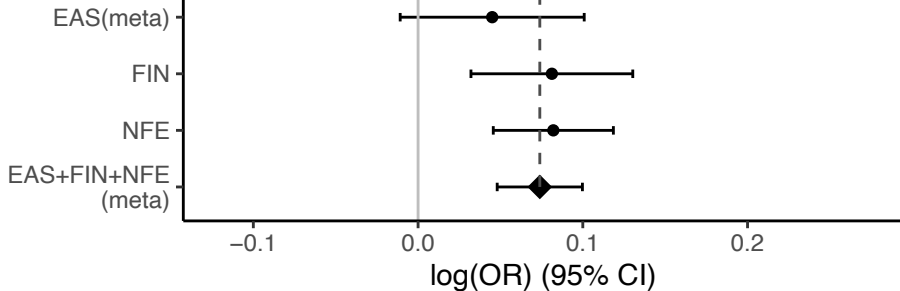

UC

chr1:226819948:C:T rs11582528 PSEN2

Reference allele: C Effect allele: T

Reported: NEW

Source: EUR+EAS

Pval: 0.943 HetPval: 0.6075

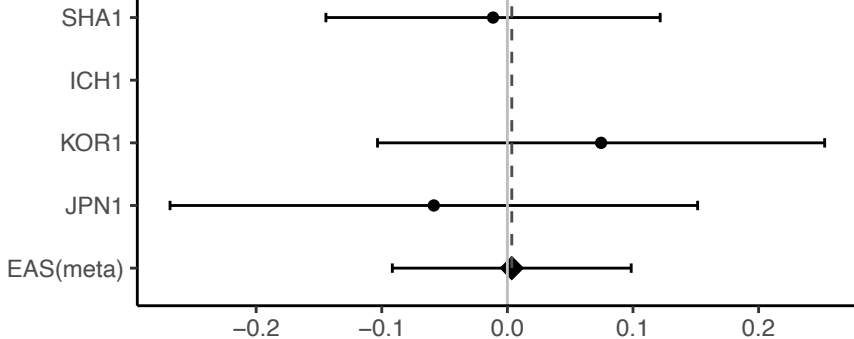

Pval: 1.55e-08 HetPval: 3.12e-01 logBF: 6.4

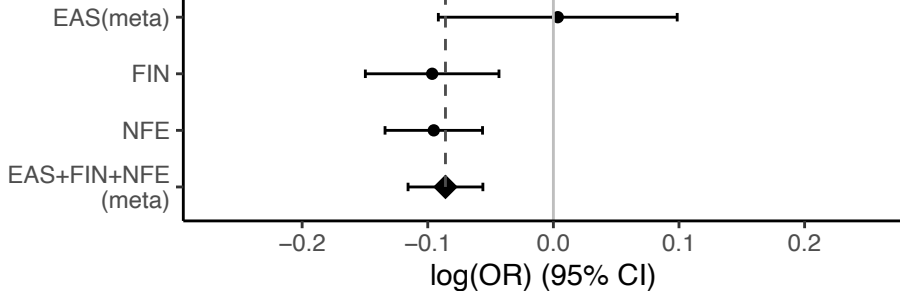

# UC

chr2:111175424:G:T rs72837826 BCL2L11

Reference allele: G Effect allele: T

Reported: NEW

Source: EUR+EAS

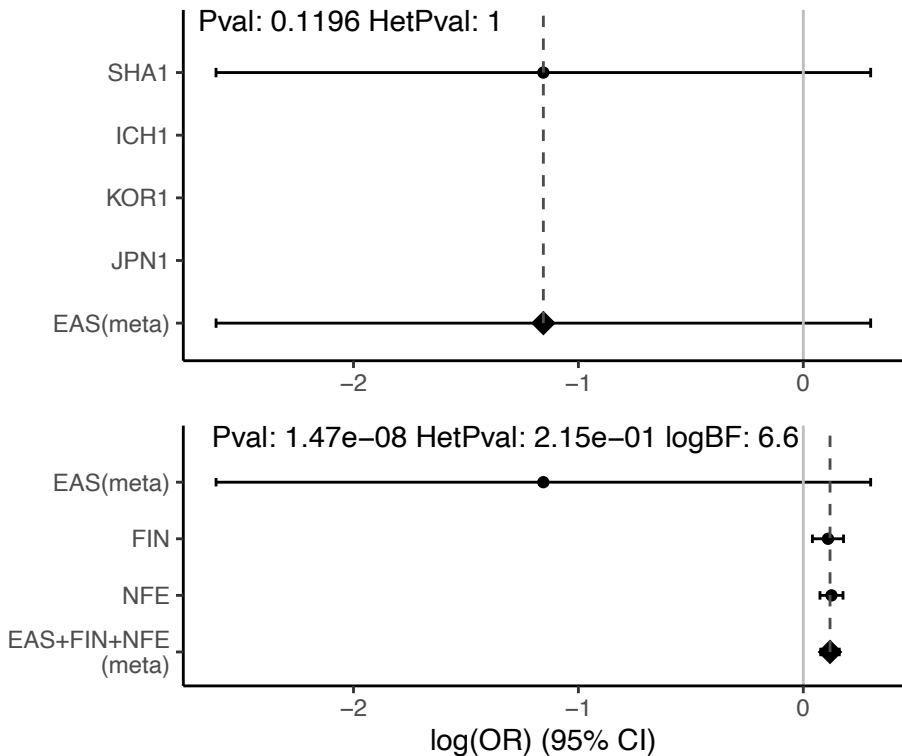



# UC

chr2:198719455:A:G rs34119476 AC019330.1

Reference allele: A Effect allele: G

Reported: NFE

Source: EUR+EAS

Pval:  $7.455e-05$  HetPval: 0.8408

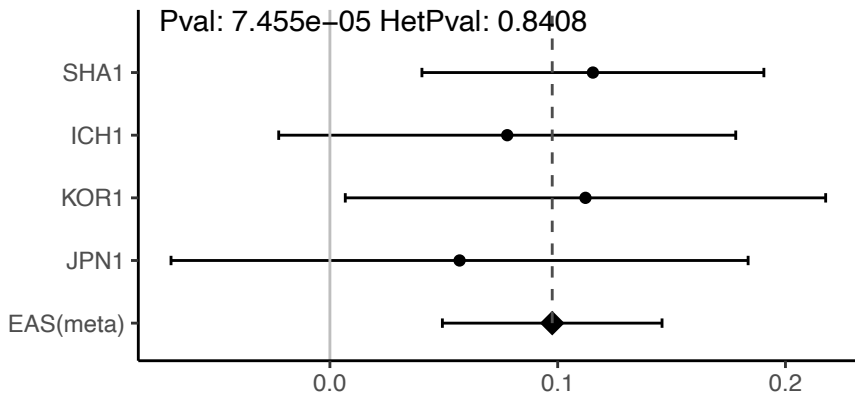

Pval:  $1.9e-19$  HetPval:  $9.31e-01$  logBF: 17

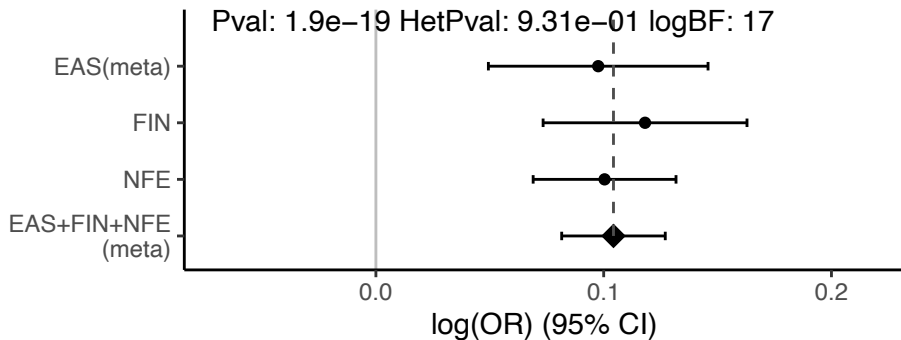

# UC

chr3:46415921:T:C rs113010081 CCRL2

Reference allele: T Effect allele: C

Reported: NFE

Source: EUR+EAS

Pval: 0.1706 HetPval: 1

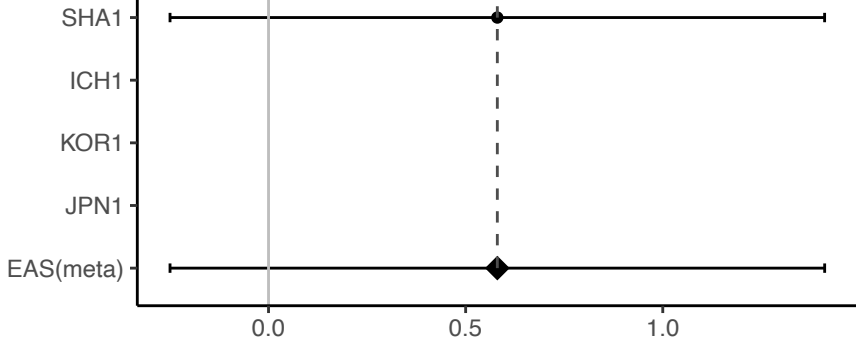

Pval: 2.47e+11 HetPval: 4.66e-01 logBF: 9.2

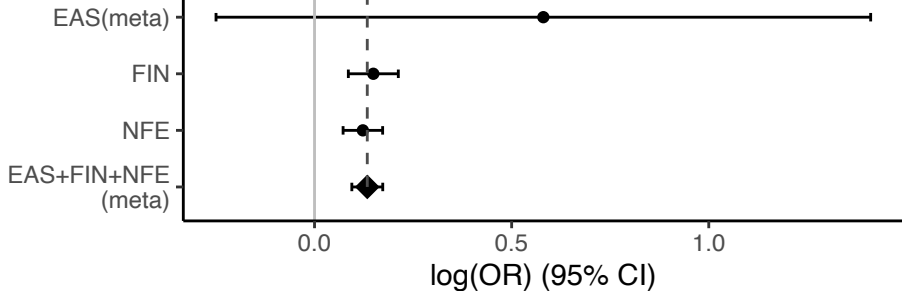

# UC

chr3:52013158:TGGA:T rs138317798 RPL29

Reference allele: TGGA Effect allele: T

Reported: NEW

Source: EUR+EAS

Pval: 0.1168 HetPval: 0.668

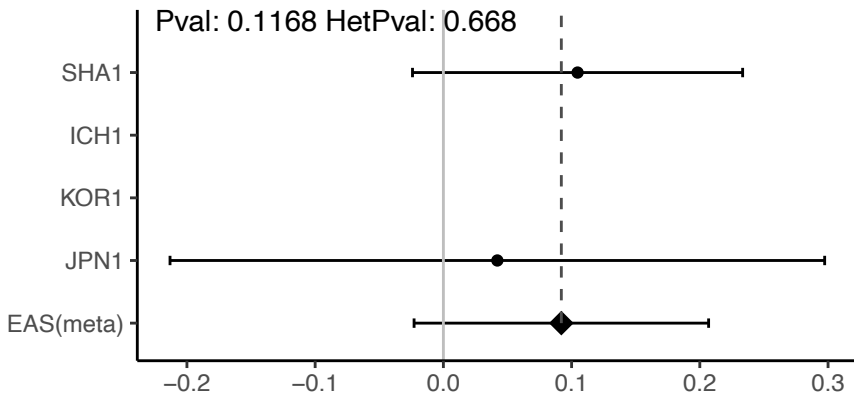

Pval: 1.43e-08 HetPval: 7.62e-01 |logBF: 6.3

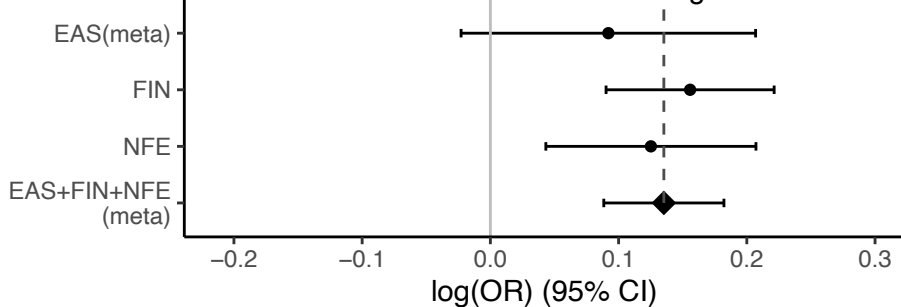

# UC

chr5:573904:G:A rs4081846 CEP72

Reference allele: G Effect allele: A

Reported: NFE

Source: EUR+EAS

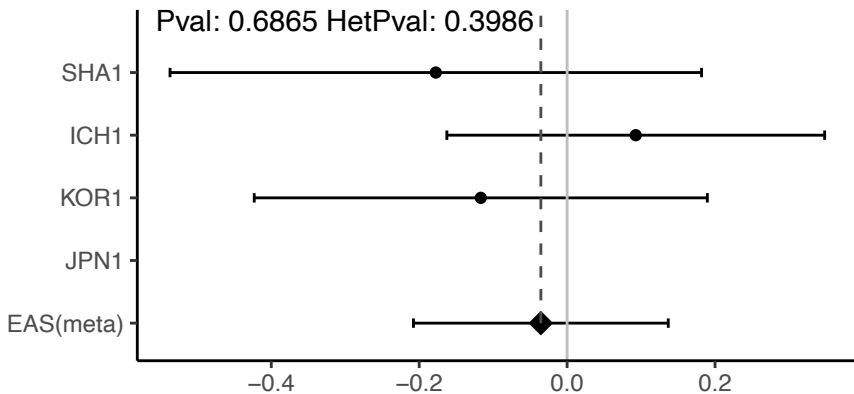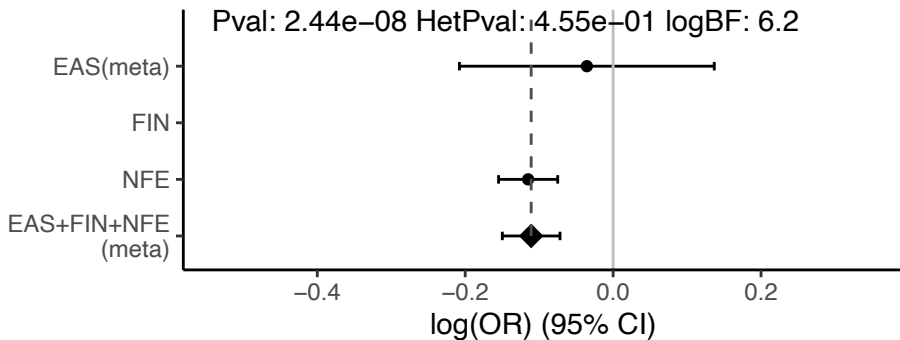

# UC

chr5:135107916:G:A rs254560 PITX1

Reference allele: G Effect allele: A

Reported: NFE

Source: EUR+EAS

Pval: 2.654e-06 HetPval: 0.4953

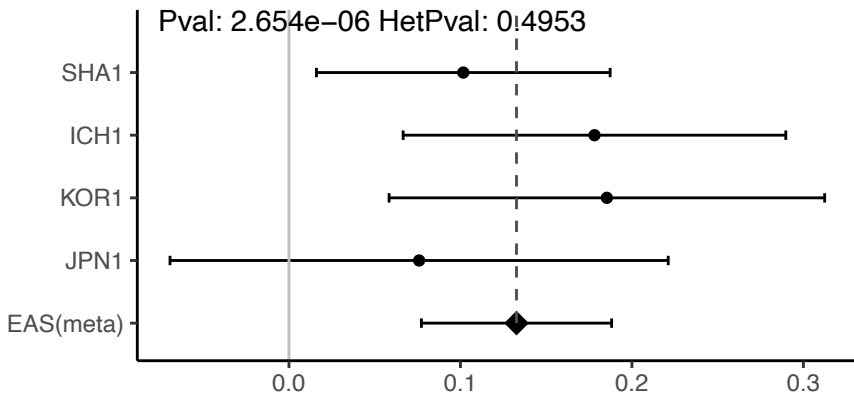

Pval: 1.73e-13 HetPval: 2.28e-01 logBF: 11

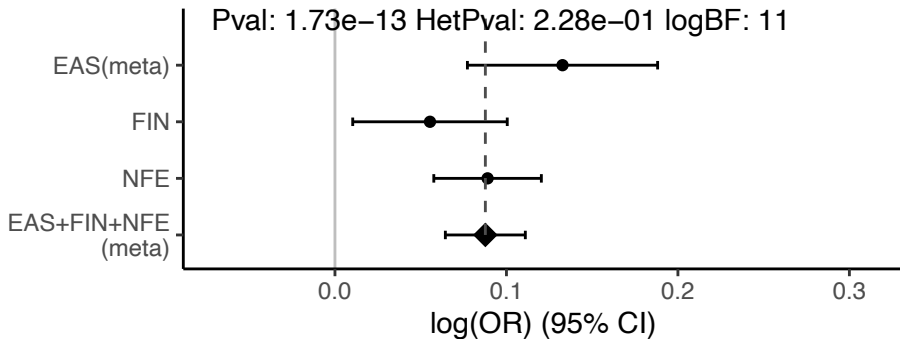

# UC

chr5:178217126:CAG:C rs55982276 PHYKPL

Reference allele: CAG Effect allele: C

Reported: NEW

Source: EUR+EAS

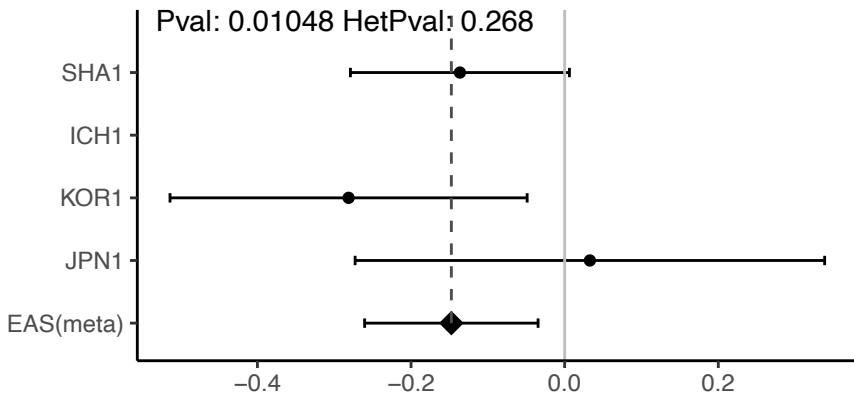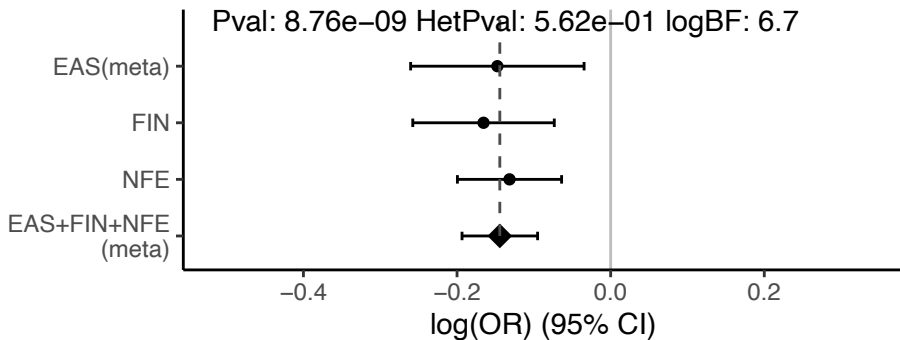

# UC

chr6:19787512:G:A rs181635615 ID4

Reference allele: G Effect allele: A

Reported: NFE

Source: EUR+EAS

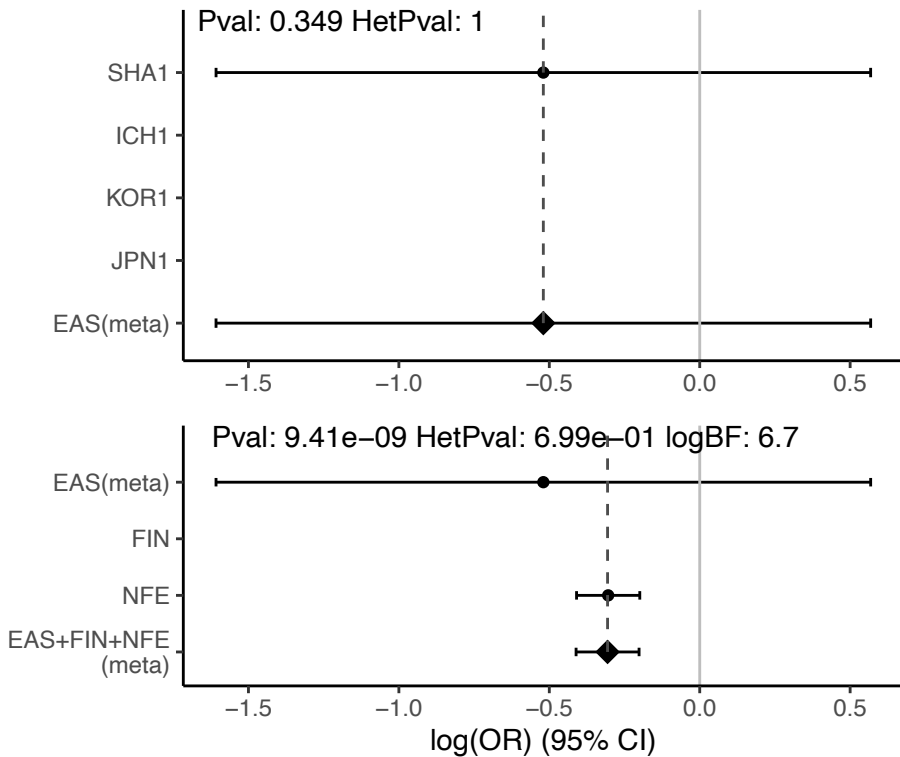

# UC

chr6:32621706:G:A rs9271511 HLA-DQA1

Reference allele: G Effect allele: A

Reported: NFE,EAS

Source: EUR+EAS

Pval:  $1.407e-56$  HetPval:  $3.388e-07$

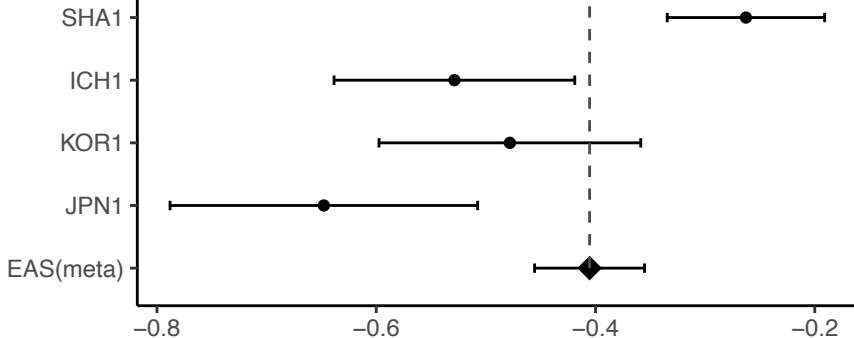

Pval:  $1.38e-158$  HetPval:  $1.77e-09$  logBF: 163

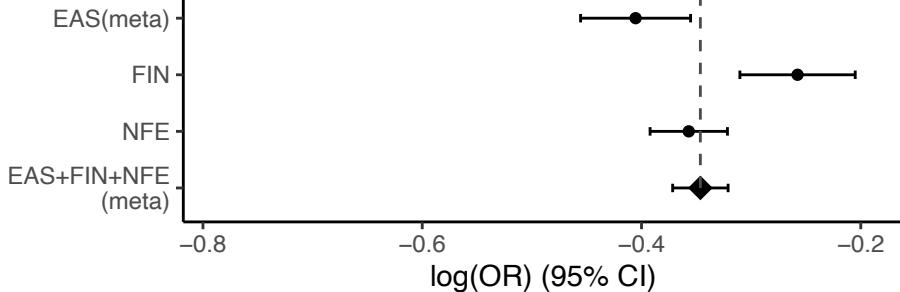



UC

chr6:111594960:G:A rs73534586 TRAF3IP2

Reference allele: G Effect allele: A

Reported: NFE

Source: EUR+EAS

Pval: 0.2039 HetPval: 1

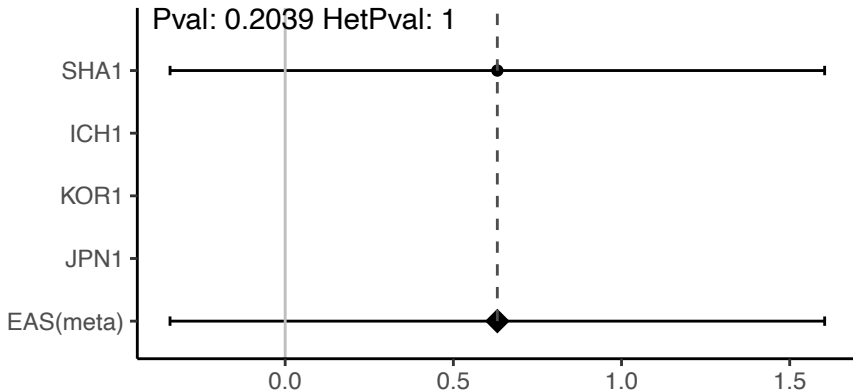

Pval:  $1.26 \times 10^{-13}$  HetPval:  $3.51 \times 10^{-1}$  logBF: 11

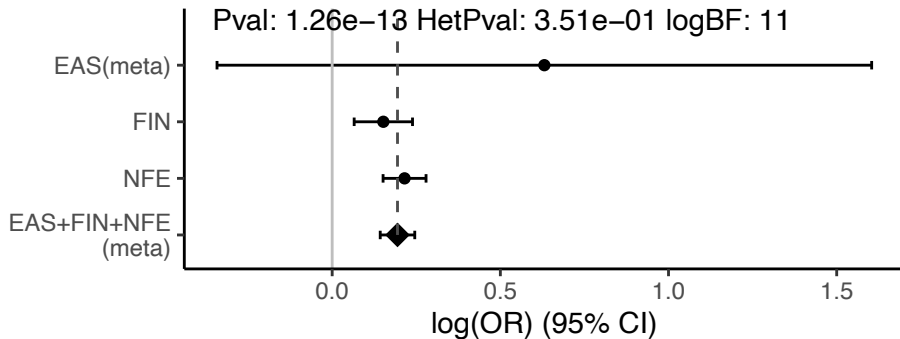

# UC

chr6:116447754:A:G rs2858829 DSE

Reference allele: A Effect allele: G

Reported: NFE,EAS

Source: EUR+EAS

Pval: 0.007196 HetPval: 0.2625

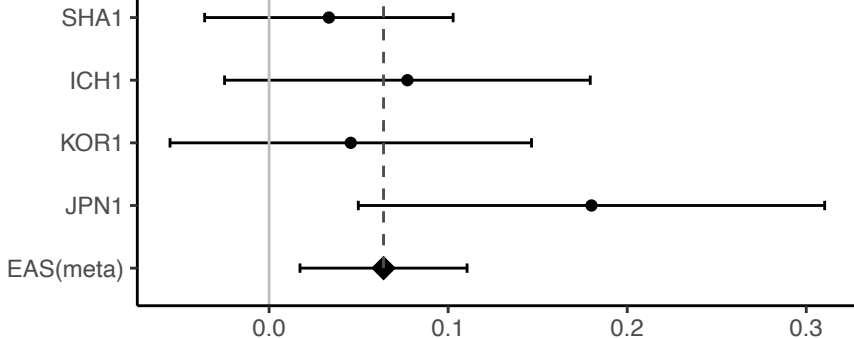

Pval: 9.12e-09 HetPval: 5.13e-01 logBF: 6.7

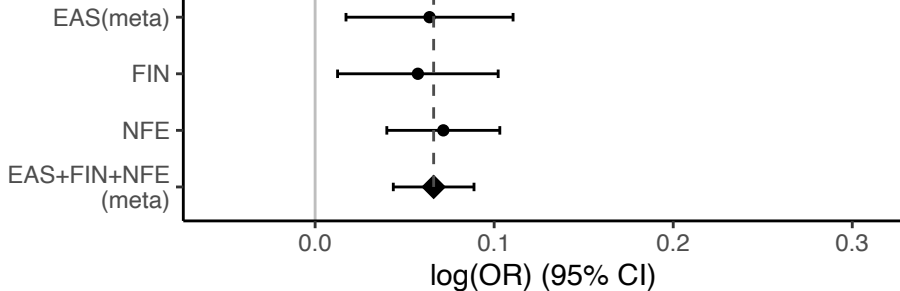

# UC

chr6:137638098:T:C rs6933404 LINC02539

Reference allele: T Effect allele: C

Reported: NFE

Source: EUR+EAS

Pval: 0.1525 HetPval: 1

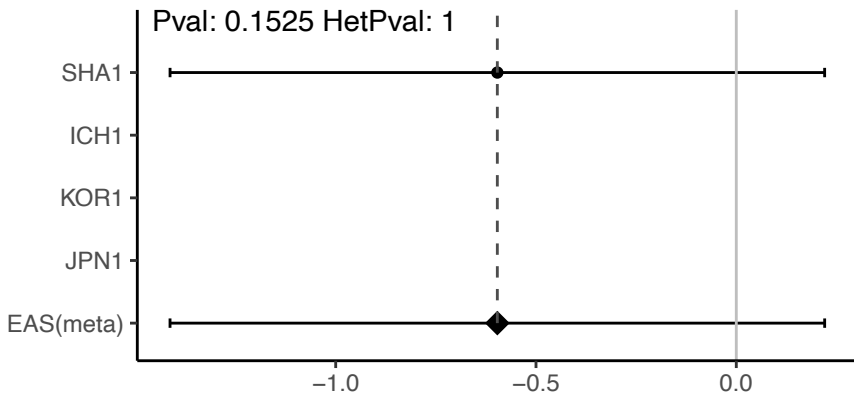

Pval:  $7.59 \times 10^{-19}$  HetPval:  $1.41 \times 10^{-1}$  logBF: 17

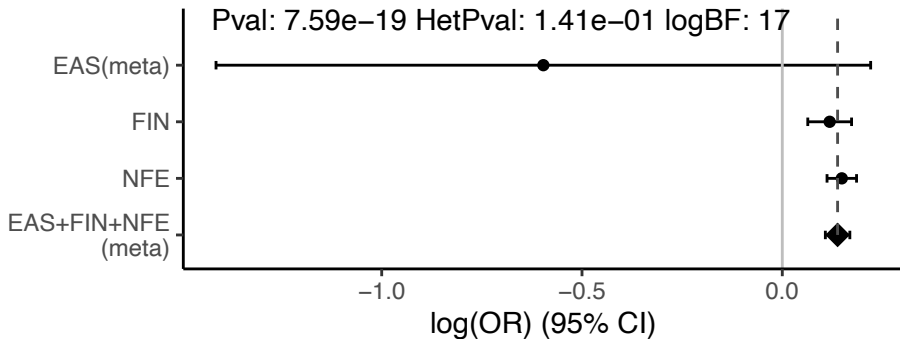

UC

chr7:2783352:T:A rs2260230 GNA12

Reference allele: T Effect allele: A

Reported: NFE

Source: EUR+EAS

Pval: 0.0006145 HetPval: 0.1228

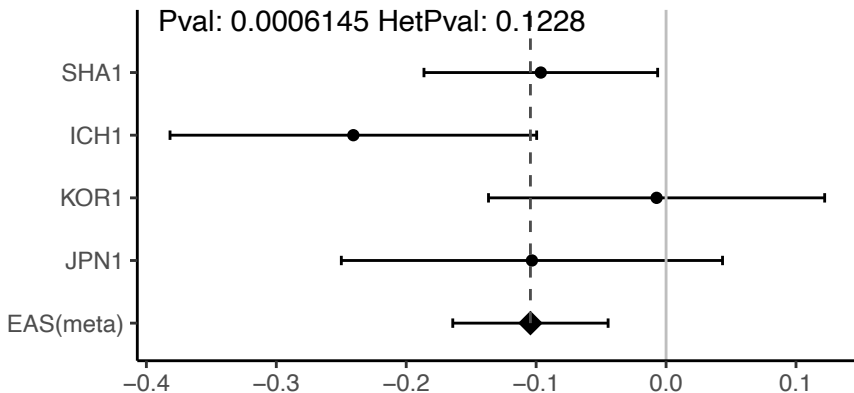

Pval: 9.81e-17 HetPval: 2.97e-01 logBF: 14

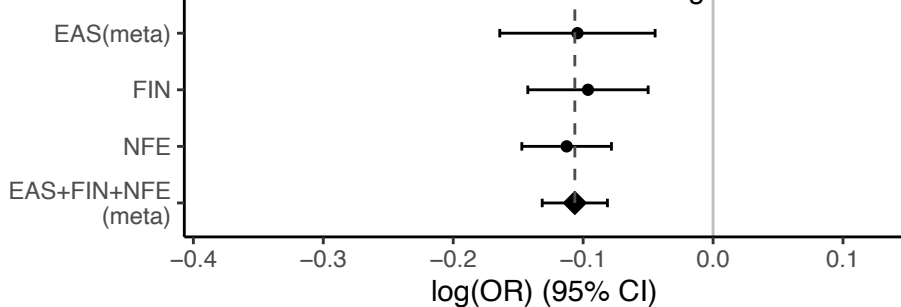

# UC

chr7:17559004:T:G rs2034400 LINC02889

Reference allele: T Effect allele: G

Reported: NFE

Source: EUR+EAS

Pval: 0.002071 HetPval: 0.7159

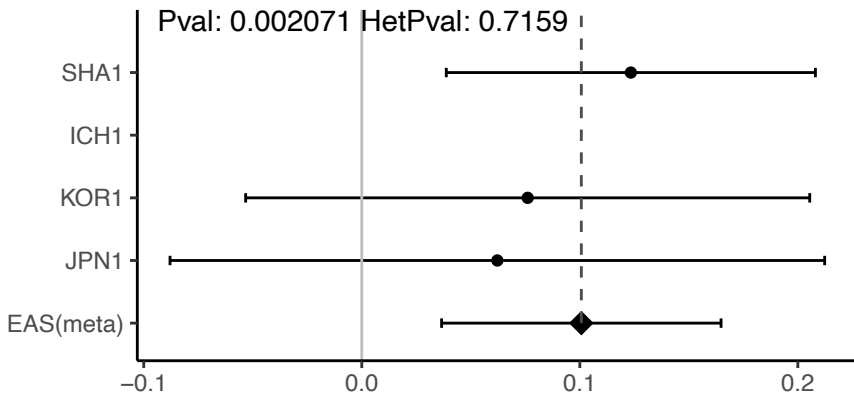

Pval: 5.82e-09 HetPval: 5.76e-01 logBF: 6.8

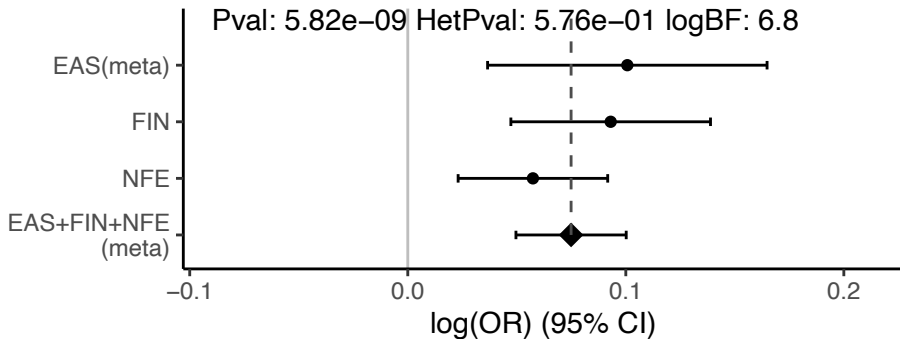

# UC

chr7:41935319:C:T rs1990134 GLI3

Reference allele: C Effect allele: T

Reported: NEW

Source: EUR+EAS

Pval: 0.001919 HetPval: 0.2361

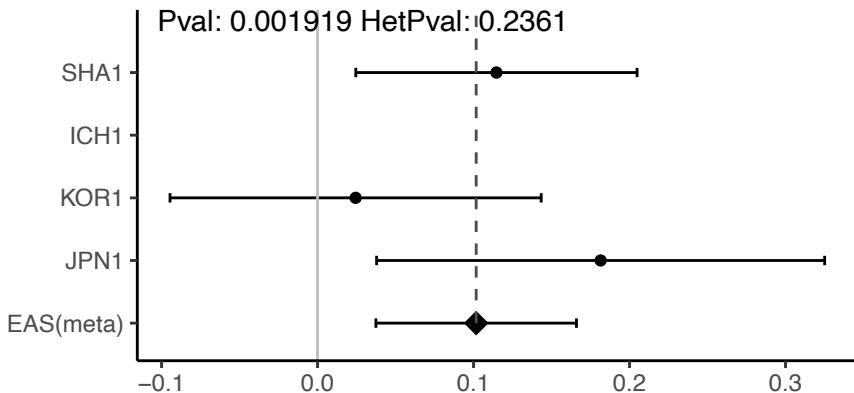

Pval: 1.13e-09 HetPval: 3.23e-01 logBF: 7.6

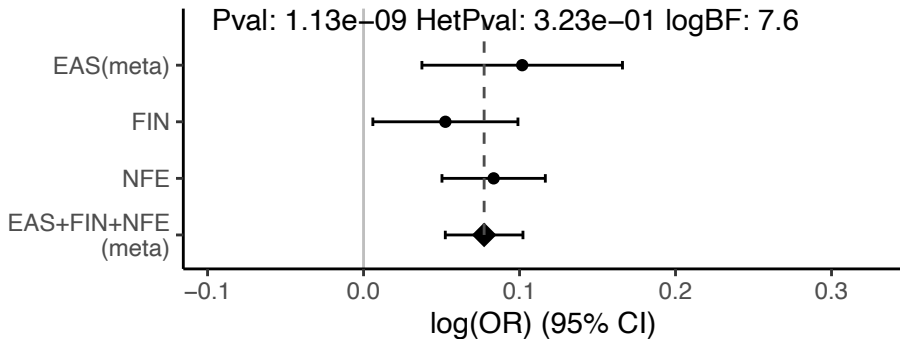

UC

chr7:46834111:A:T rs6976037 EPS15P1

Reference allele: A Effect allele: T

Reported: NEW

Source: EUR+EAS

Pval: 0.03584 HetPval: 0.6928

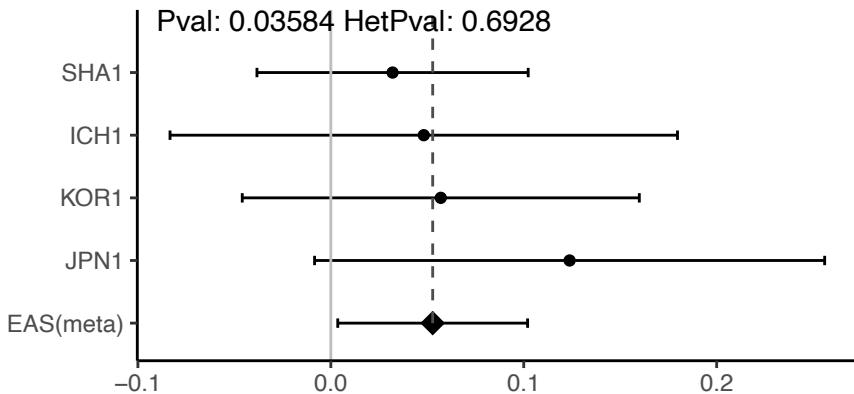

Pval: 5.22e-09 HetPval: 8.41e-01 logBF: 7

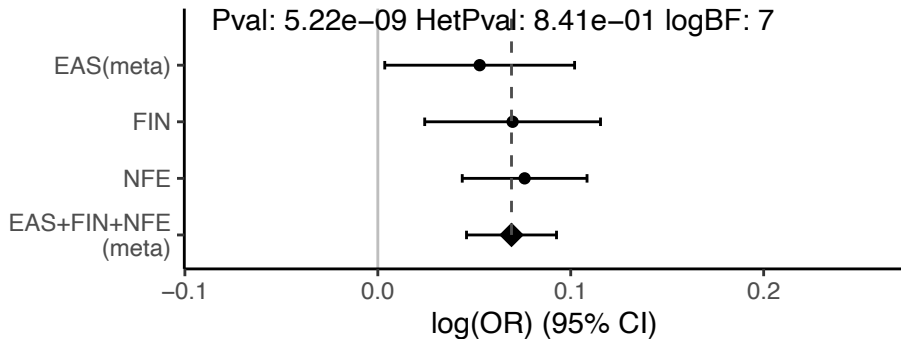

# UC

chr7:107839870:T:C rs4380874 SLC26A3

Reference allele: T Effect allele: C

Reported: NFE

Source: EUR+EAS

Pval: 0.03545 HetPval: 0.3777

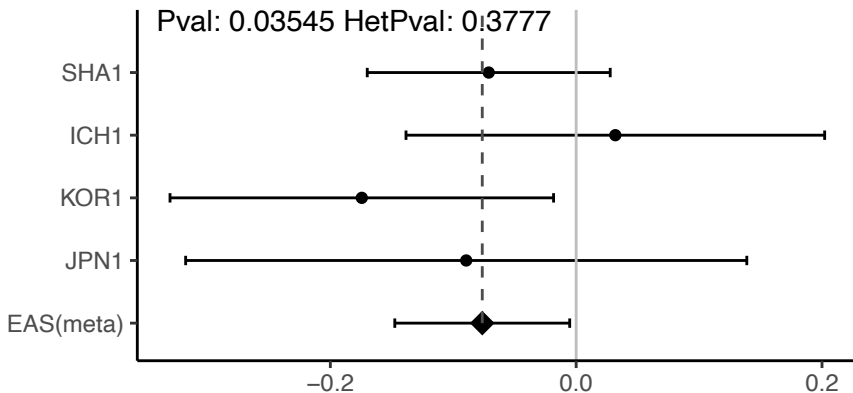

Pval: 1.64e-28 HetPval: 2.49e-01 logBF: 26

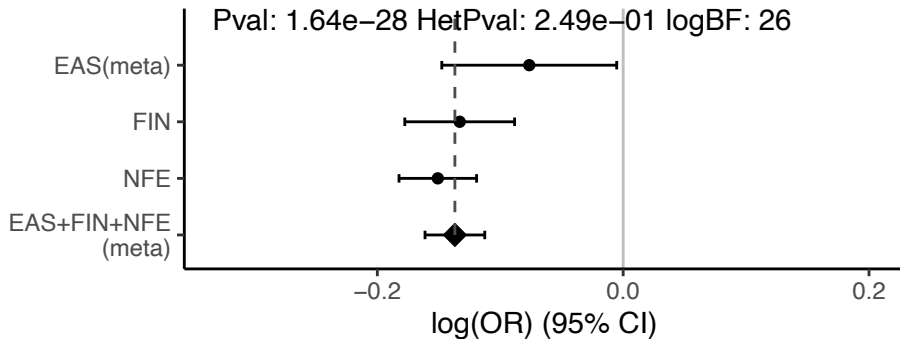



# UC

chr7:117249664:G:A rs38902 ST7

Reference allele: G Effect allele: A

Reported: NFE

Source: EUR+EAS

Pval: 0.1003 HetPval: 0.0003436

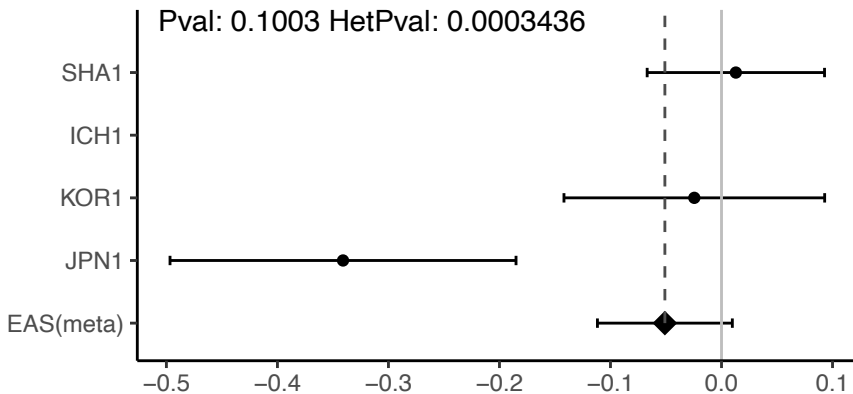

Pval: 1.78e-07 HetPval: 2.87e-03 logBF: 6.4

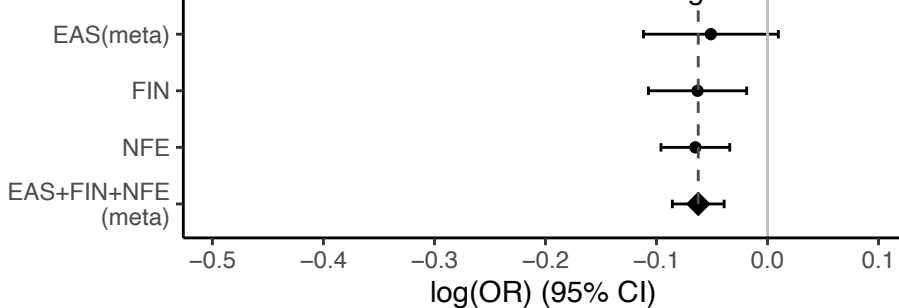

# UC

chr7:128936032:T:C rs3757387 IRF5

Reference allele: T Effect allele: C

Reported: NFE,EAS

Source: EUR+EAS

Pval:  $3.186 \times 10^{-5}$  HetPval: 0.04472

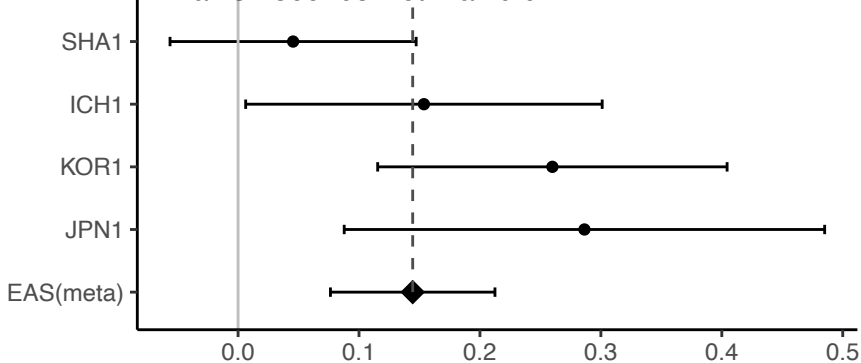

Pval:  $1.5 \times 10^{-17}$  HetPval:  $8.24 \times 10^{-2}$  logBF: 15

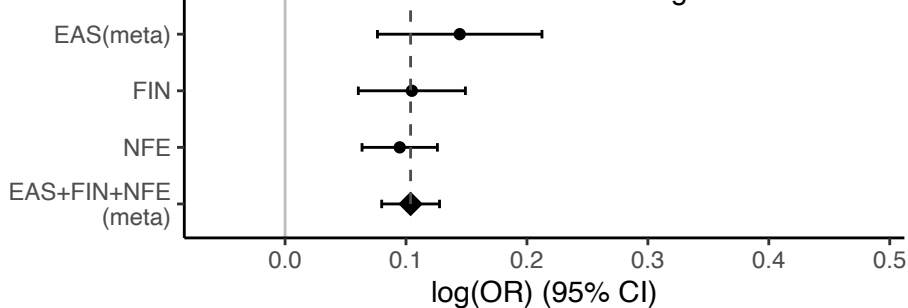

# UC

chr8:48207903:G:T rs77535993 IDI1P2

Reference allele: G Effect allele: T

Reported: NFE

Source: EUR+EAS

Pval: 0.001037 HetPval: 0.09466

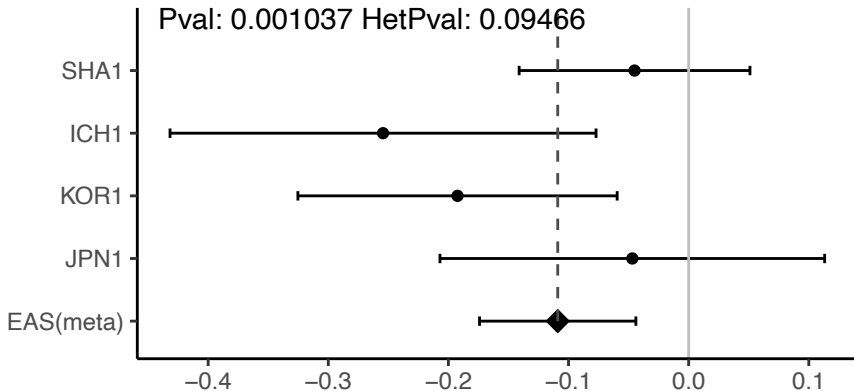

Pval: 5.5e-09 HetPval: 2.05e-01 logBF: 6.9

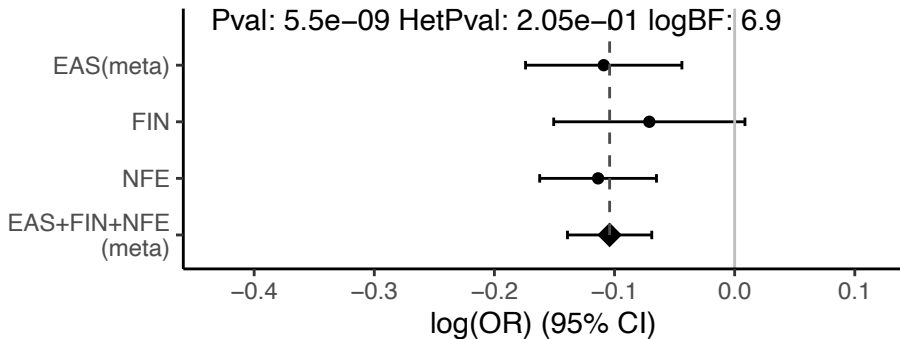

# UC

chr8:115614948:T:C rs2721933 TRPS1

Reference allele: T Effect allele: C

Reported: NEW

Source: EUR+EAS

Pval: 0.00352 HetPval: 0.8664

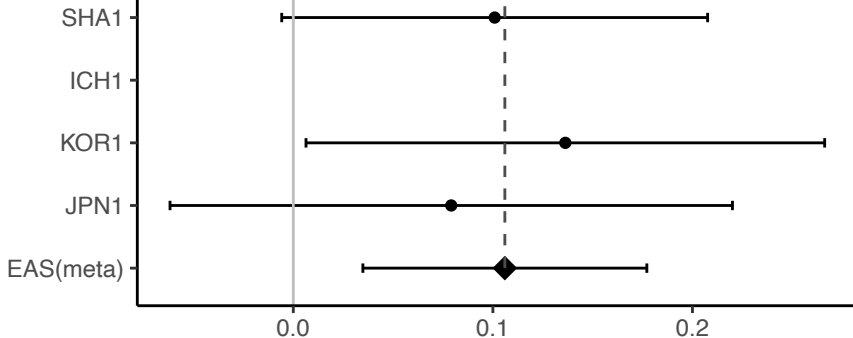

Pval:  $2e-08$  HetPval:  $8.07e-01$  logBF: 6.4

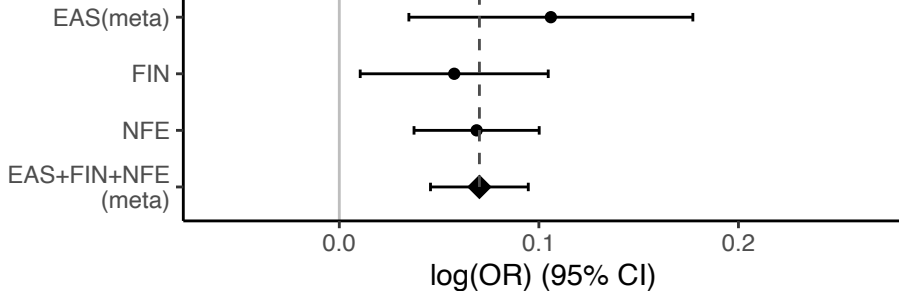

UC

chr10:89146767:C:G rs11203002 CH25H

Reference allele: C Effect allele: G

Reported: NEW

Source: EUR+EAS

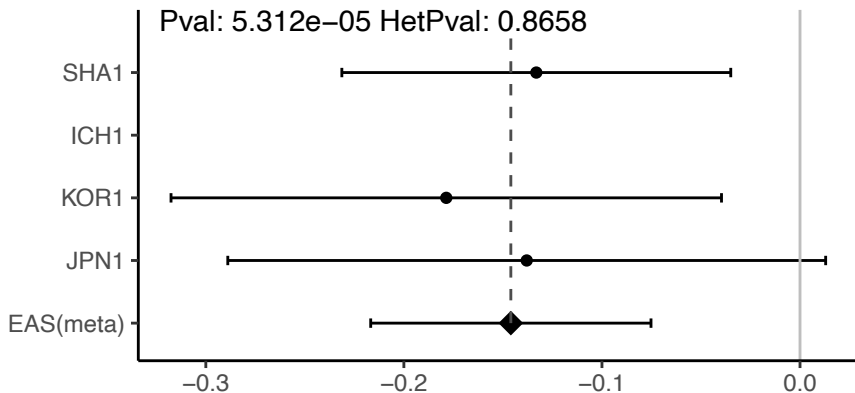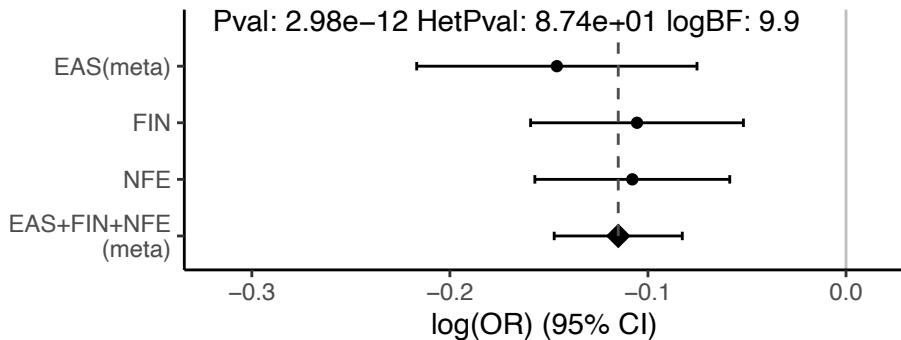

UC

chr10:96860106:T:G rs11188950 LCOR

Reference allele: T Effect allele: G

Reported: EAS

Source: EUR+EAS

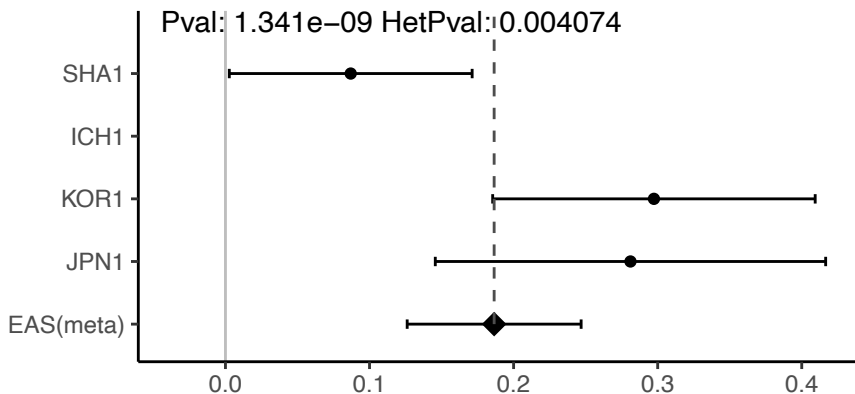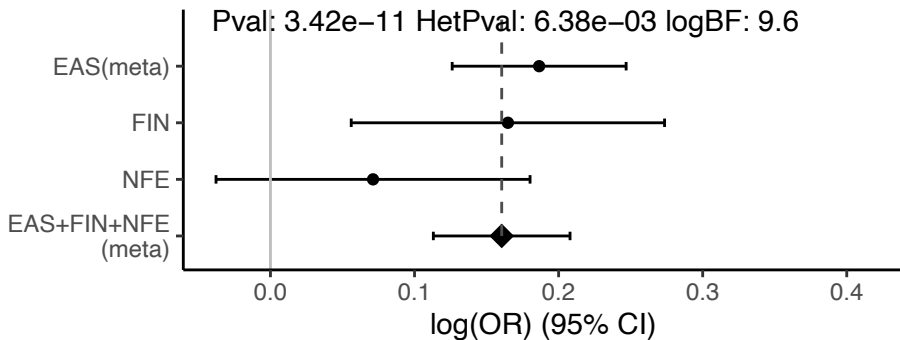

# UC

chr10:101436625:AATAGATAGATAGATAG:AATAGATAGATAG

Reference allele: AATAGATAGATAGATAG Effect allele: A

Reported: NEW

Source: EUR+EAS

Pval: - HetPval: -

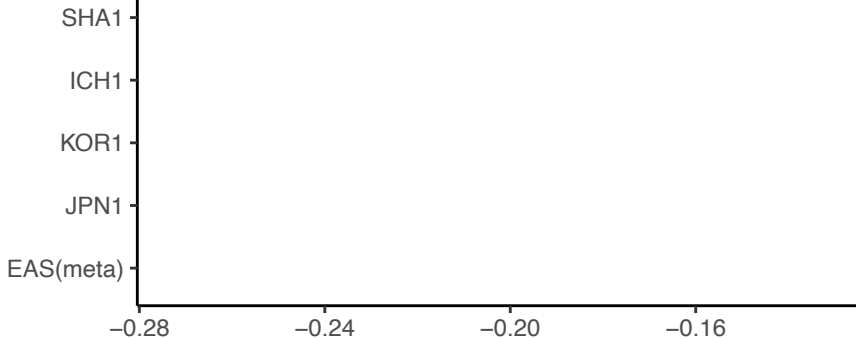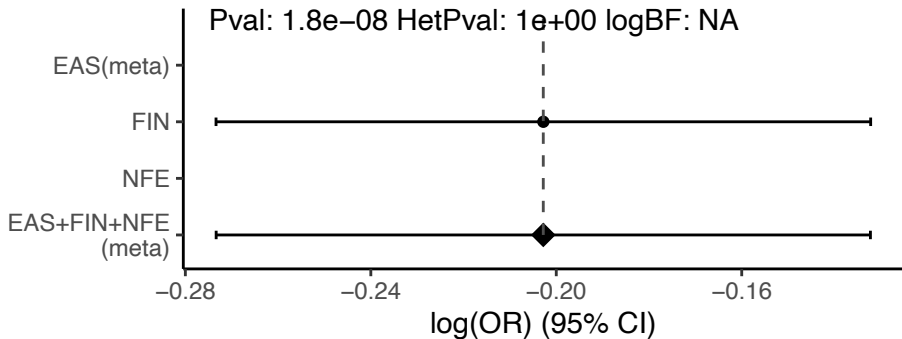

UC

chr10:102465559:C:G rs11591780 MFSD13A

Reference allele: C Effect allele: G

Reported: NFE

Source: EUR+EAS

Pval: 0.03896 HetPval: 0.4736

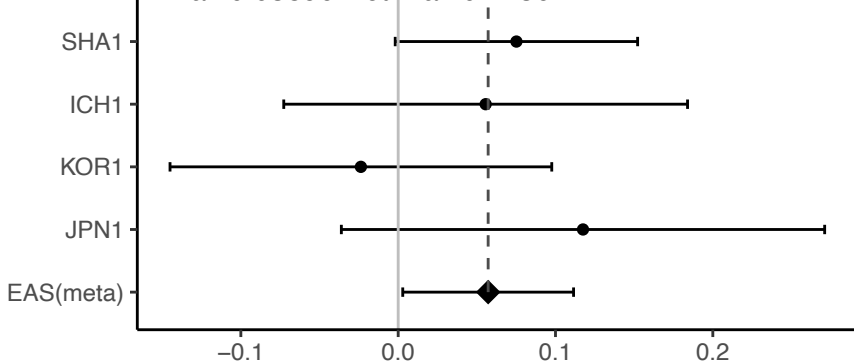

Pval: 5.07e-09 HetPval: 6.83e-01 logBF: 7.1

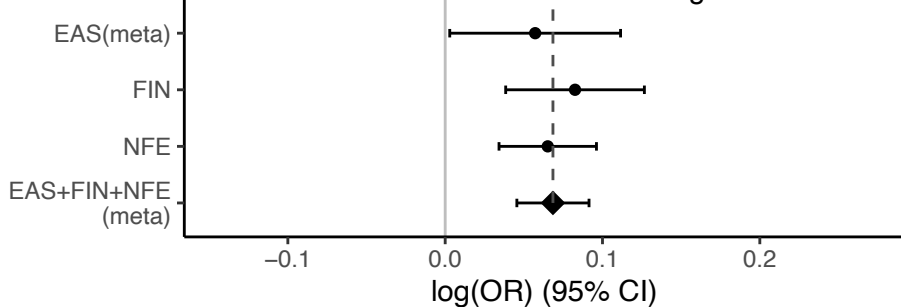



UC

chr11:58571651:T:C rs10896794 LPXN

Reference allele: T Effect allele: C

Reported: NFE

Source: EUR+EAS

Pval: 0.00159 HetPval: 0.2751

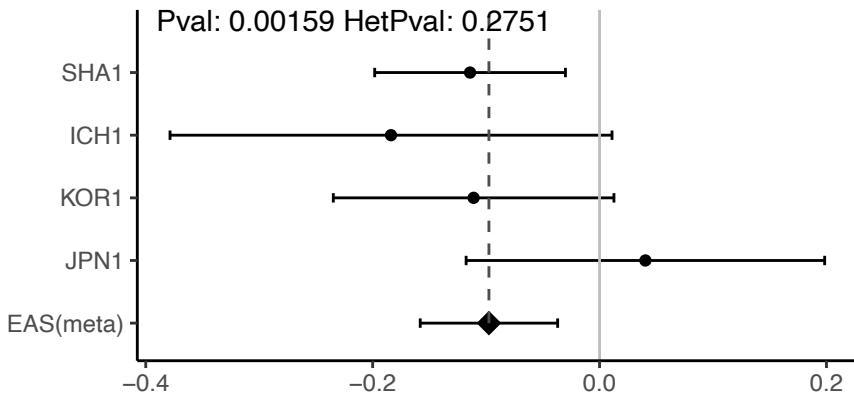

Pval: 2.39e-08 HetPval: 4.11e-01 logBF: 6.1

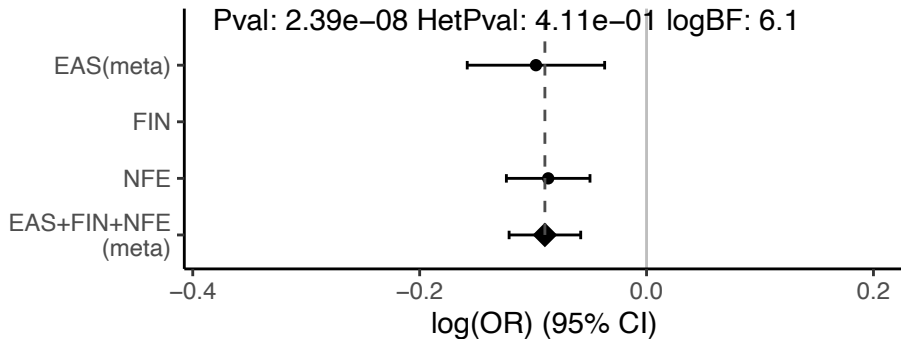

UC

chr11:114516108:C:T rs561722 NXPE1

Reference allele: C Effect allele: T

Reported: NFE

Source: EUR+EAS

Pval: 0.0001268 HetPval: 0.4979

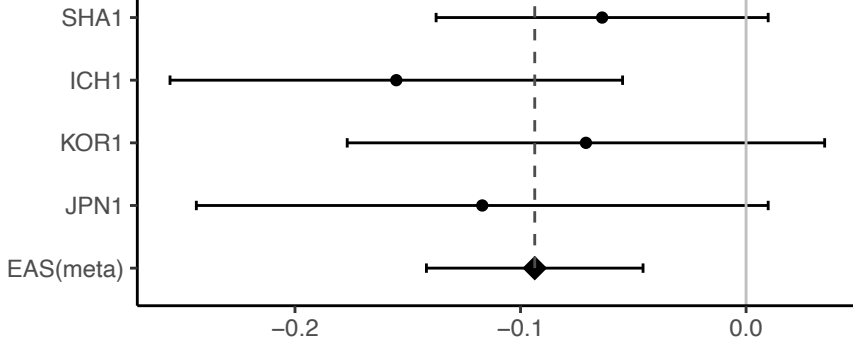

Pval: 9.26e-15 HetPval: 4.88e-01 logBF: 13

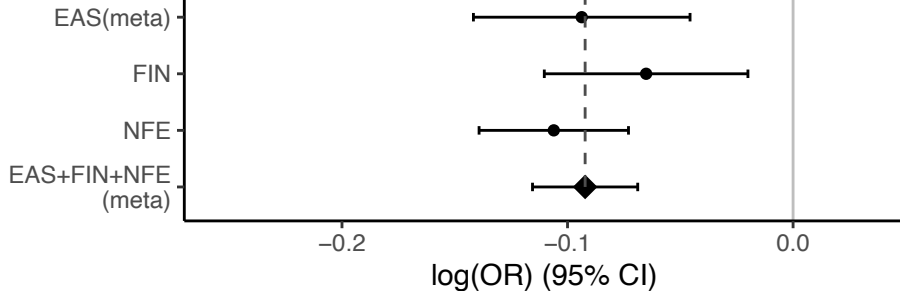

# UC

chr13:26957130:T:C rs17085007 RPS21P8

Reference allele: T Effect allele: C

Reported: NFE,EAS

Source: EUR+EAS

Pval:  $3.943e-25$  HetPval: 0.02891

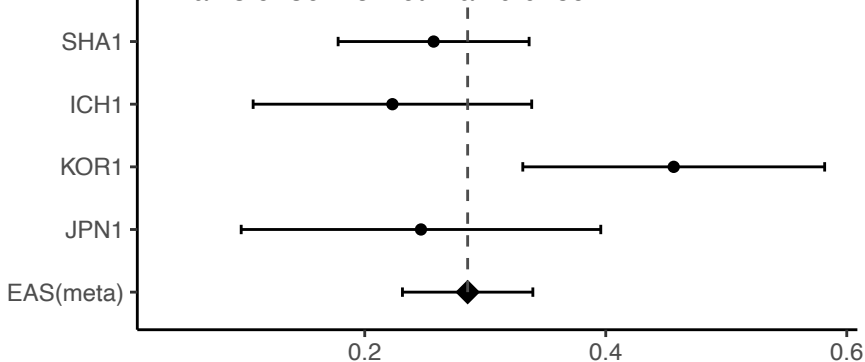

Pval:  $3.79e-35$  HetPval:  $2.51e-06$  logBF: 35

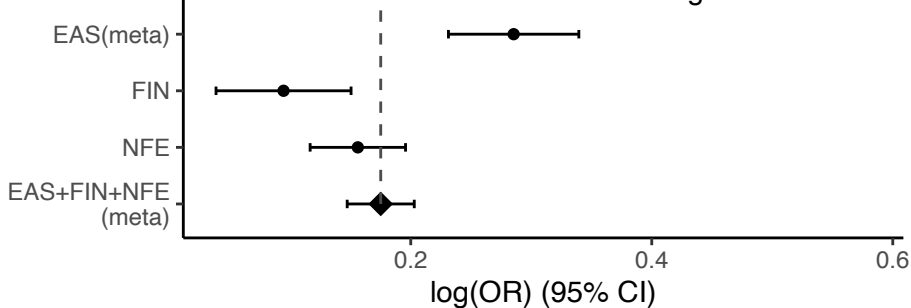

UC

chr13:42797254:C:T rs1535903 FAM216B

Reference allele: C Effect allele: T

Reported: NFE

Source: EUR+EAS

Pval: 0.0007291 HetPval: 0.8013

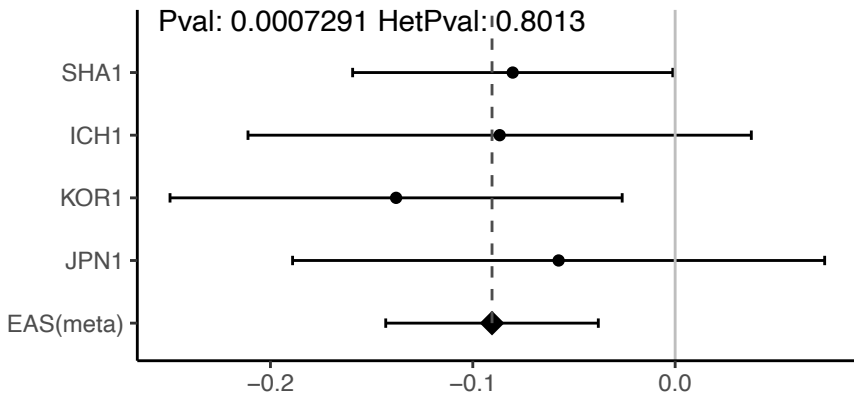

Pval: 1.04e-08 HetPval: 8.84e-01 logBF: 6.6

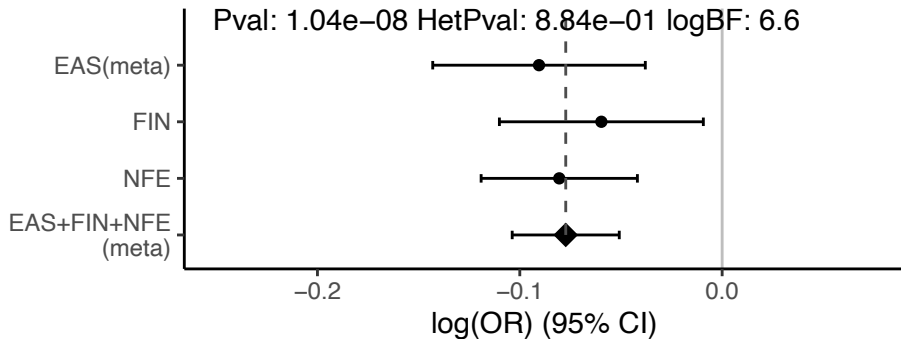

# UC

chr14:65142694:C:G rs4902367 MAX

Reference allele: C Effect allele: G

Reported: NEW

Source: EUR+EAS

Pval: 0.03053 HetPval: 0.01635

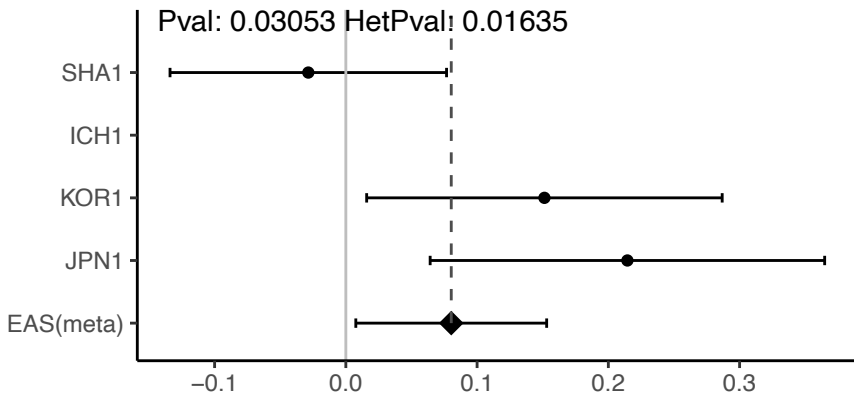

Pval: 2.79e-09 HetPval: 4.08e-02 logBF: 7.3

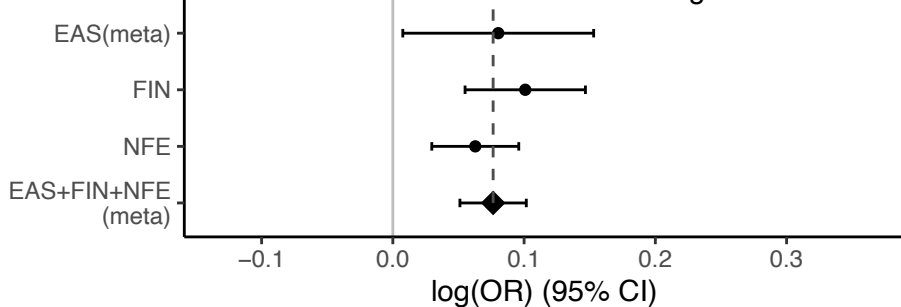

# UC

chr16:23857964:G:A rs59790099 PRKCB

Reference allele: G Effect allele: A

Reported: NFE

Source: EUR+EAS

Pval: 0.006033 HetPval: 0.001579

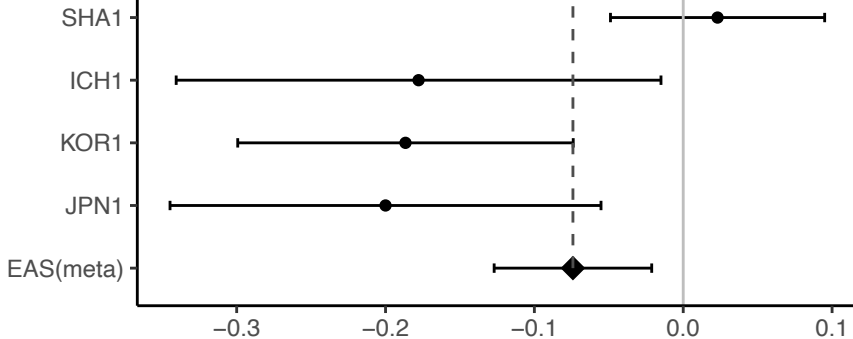

Pval: 2.09e-11 HetPval: 3.77e-03 logBF: 9

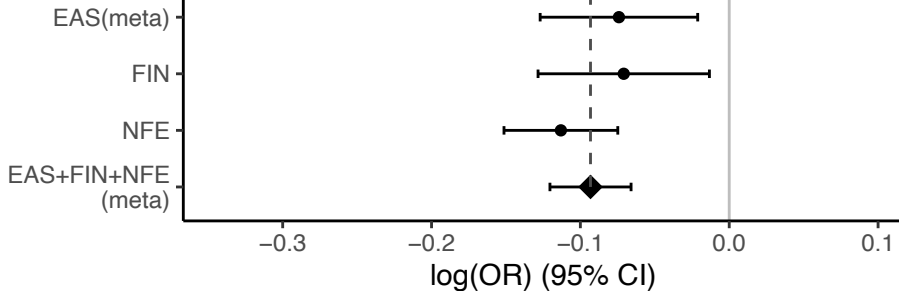

UC

chr16:27384341:C:CT rs201121732 IL21R

Reference allele: C Effect allele: CT

Reported: NEW

Source: EUR+EAS

Pval: 1.751e-08 HetPval: 0.6261

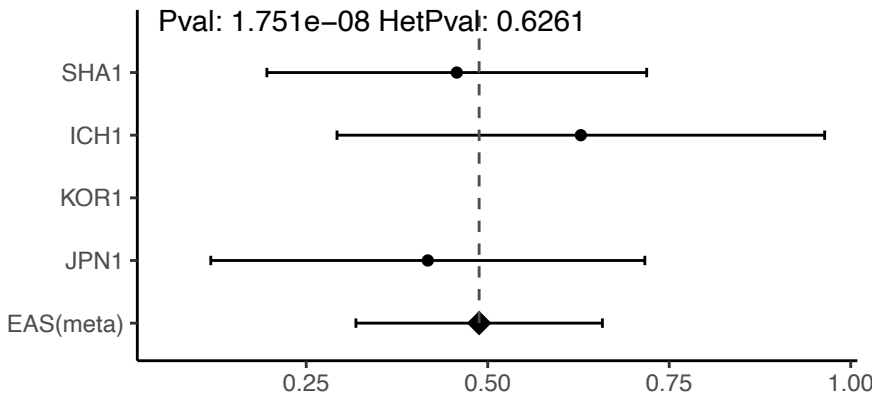

Pval: 2.53e-08 HetPval: 5.26e-03 logBF: 7.3

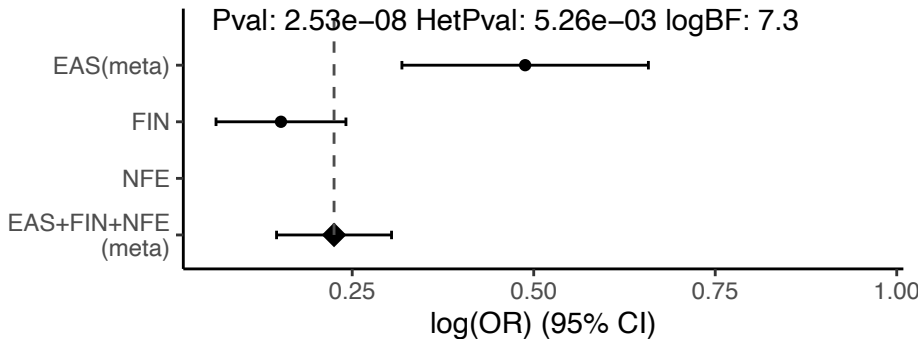

UC

chr16:30328432:G:A rs77948921 CD2BP2

Reference allele: G Effect allele: A

Reported: NFE

Source: EUR+EAS

Pval: 0.04288 HetPval: 0.6844

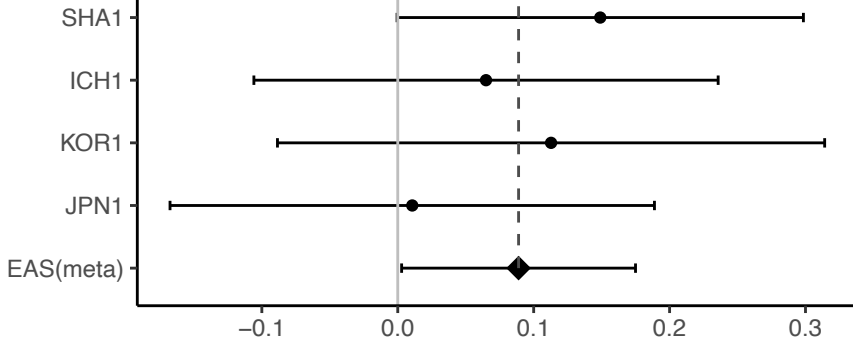

Pval: 9.43e-12 HetPval: 7.59e-01 logBF: 9.4

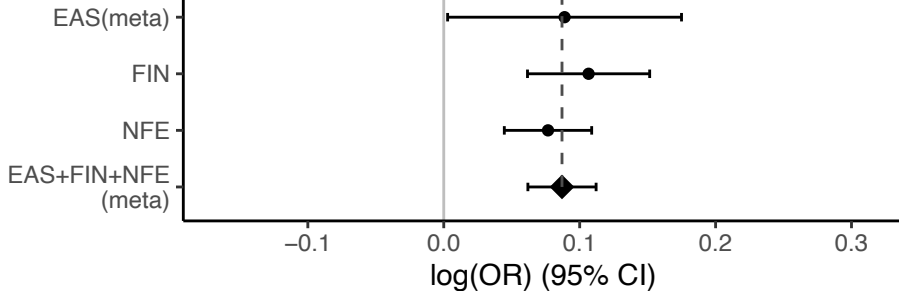



# UC

chr16:68626662:C:T rs6499186 CDH3

Reference allele: C Effect allele: T

Reported: NFE

Source: EUR+EAS

Pval: 0.009187 HetPval: 0.8558

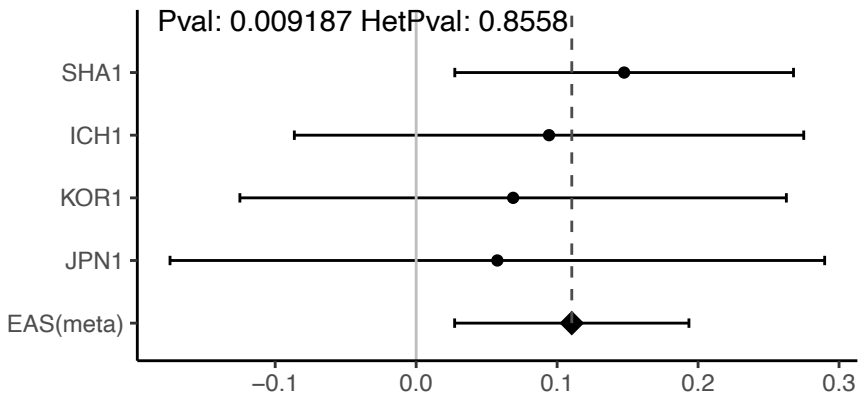

Pval: 3.36e-09 HetPval: 7.39e-01 logBF: 7.1

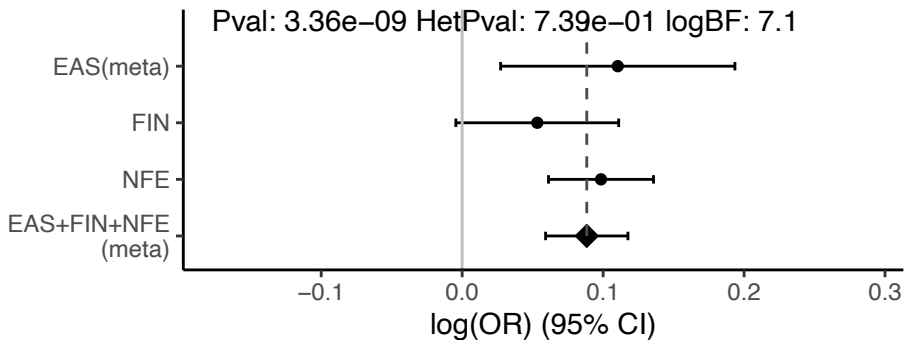

# UC

chr17:40619224:C:T rs9911533 SMARCE1

Reference allele: C Effect allele: T

Reported: NEW

Source: EUR+EAS

Pval: 0.003097 HetPval: 0.9723

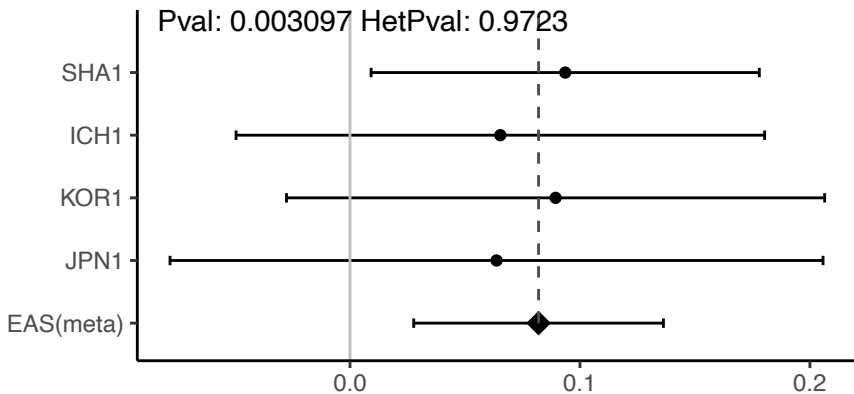

Pval:  $1.94e-14$  HetPval:  $9.77e-01$  logBF: 12

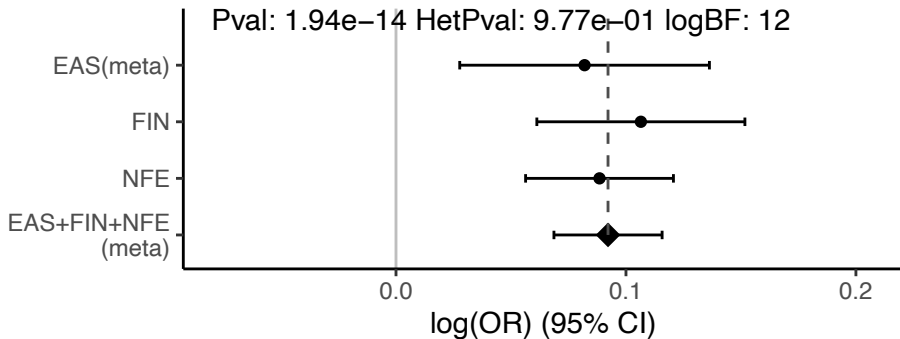

UC

chr17:81183249:G:T rs116885423 PVALEF

Reference allele: G Effect allele: T

Reported: NEW

Source: EUR+EAS

Pval: - HetPval: -

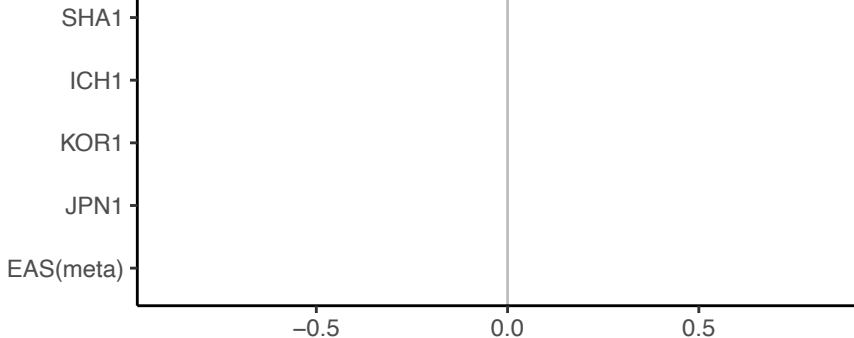

Pval: 1.88e-08 HetPval: 2.66e-01 logBF: 6.4

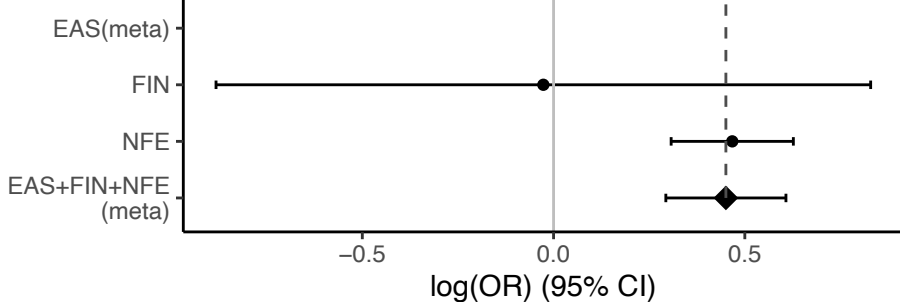

# UC

chr19:54871595:G:A rs11672983 FCAR

Reference allele: G Effect allele: A

Reported: NFE

Source: EUR+EAS

Pval: 0.001872 HetPval: 0.3377

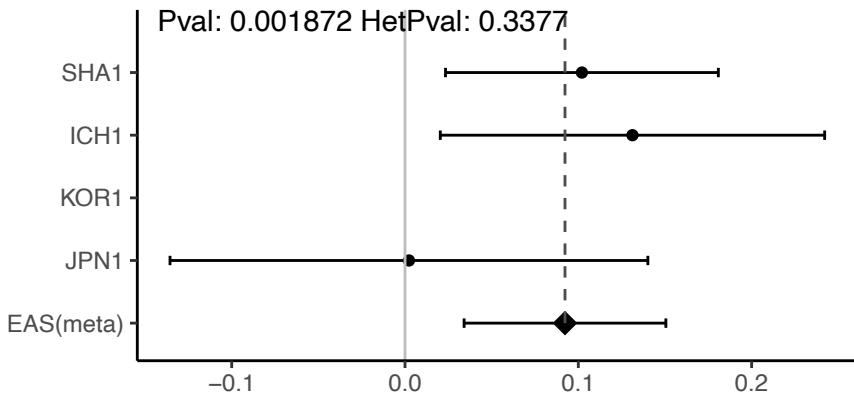

Pval: 1.82e-09 HetPval: 2e+01 logBF: 7.4

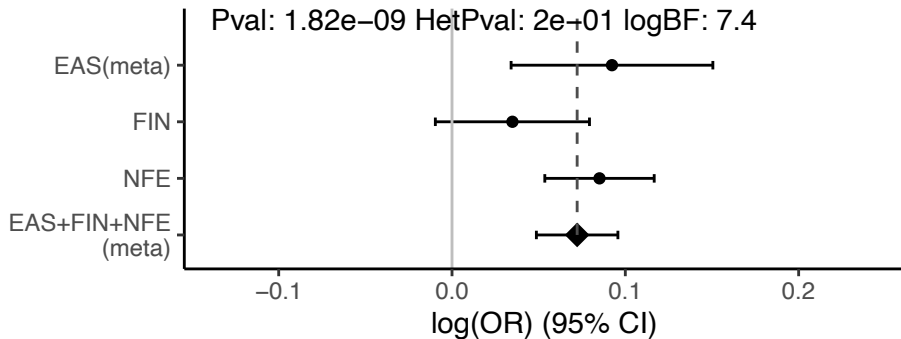

# UC

chr20:44436388:A:C rs6017342 HNF4A

Reference allele: A Effect allele: C

Reported: NFE

Source: EUR+EAS

Pval:  $8.965e-08$  HetPval: 0.8429

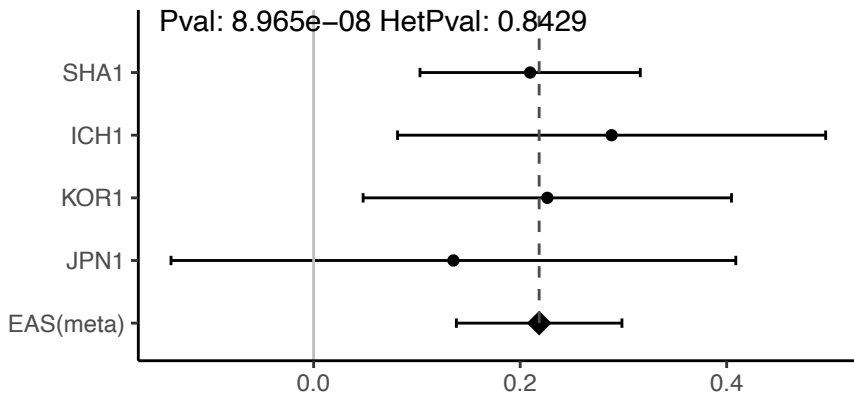

Pval:  $5.3e-46$  HetPval:  $6.13e-01$  logBF: 44

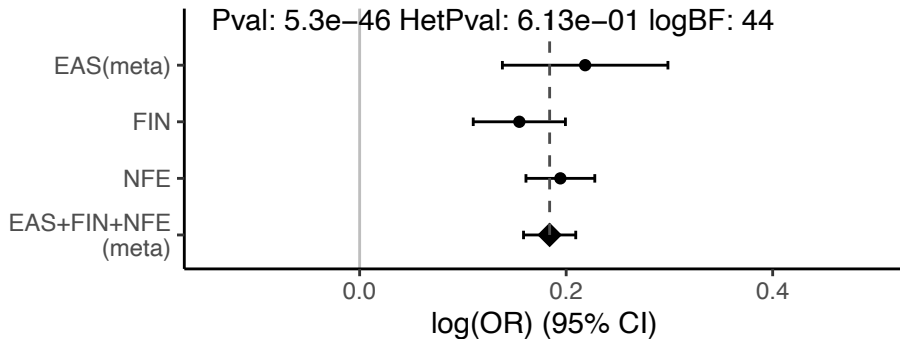

UC

chr22:35242122:G:C rs4821382 HMGXB4

Reference allele: G Effect allele: C

Reported: NFE

Source: EUR+EAS

Pval: 0.0009128 HetPval: 0.616

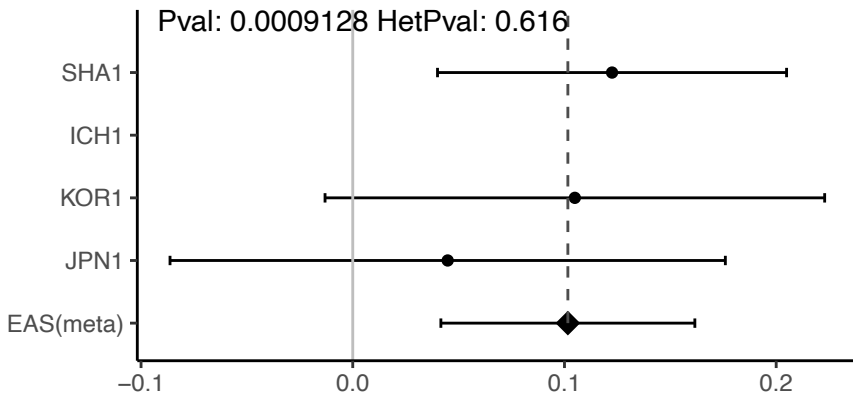

Pval: 3.1e-10 HetPval: 7.03e-01 logBF: 8.2

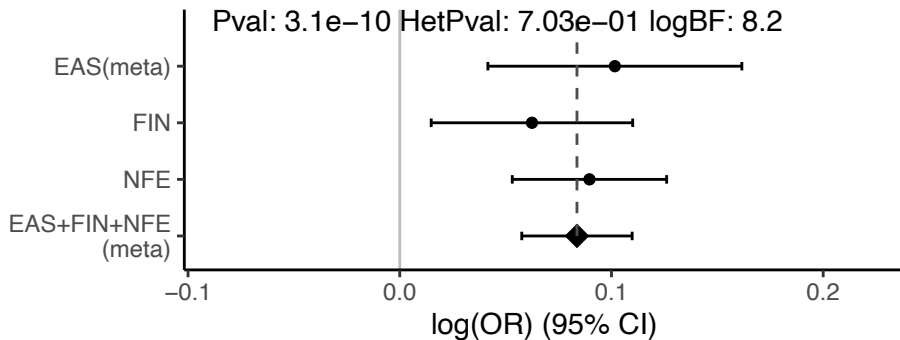

# UC

chr22:50003556:A:C rs5771192 IL17REL

Reference allele: A Effect allele: C

Reported: NFE

Source: EUR+EAS

Pval: 0.05376 HetPval: 0.9172

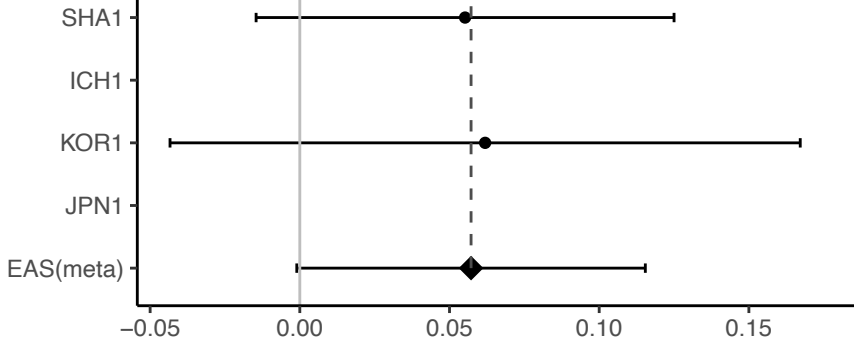

Pval: 1.12e-17 HetPval: 2.7e-01 logBF: 8.5

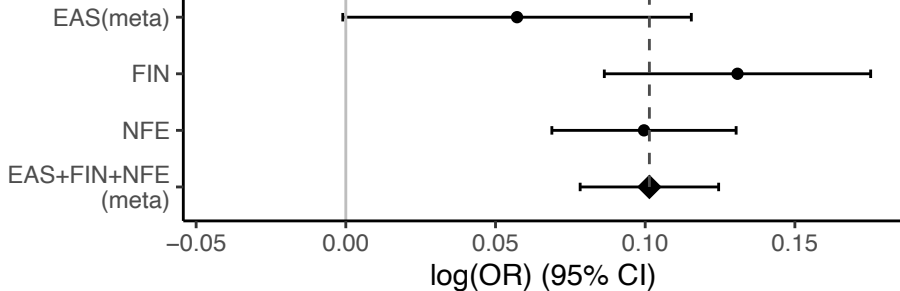

# IBD

chr1:1388944:G:A rs9726836 CCNL2

Reference allele: G Effect allele: A

Reported: NFE

Source: EUR+EAS

Pval: 0.3887 HetPval: 0.06115

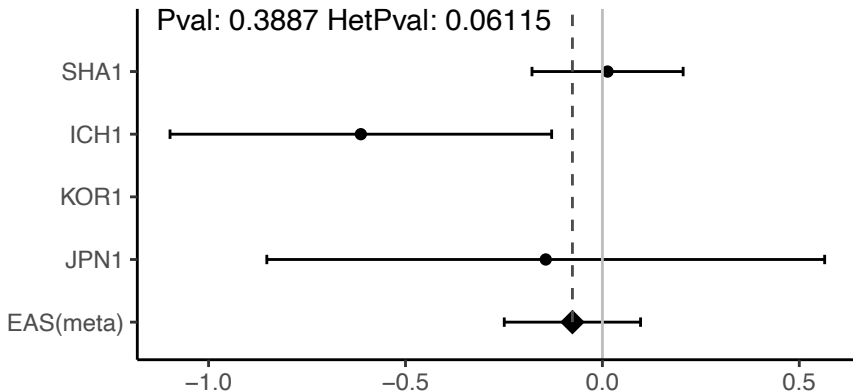

Pval: 3.08e-13 HetPval: 1.94e+01 logBF: 11

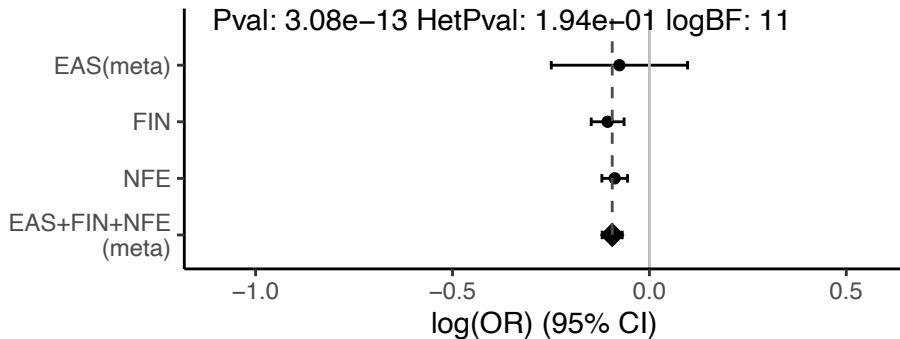



# IBD

chr1:8035426:T:C rs225131 ERRFI1

Reference allele: T Effect allele: C

Reported: NFE

Source: EUR+EAS

Pval: 0.0001666 HetPval: 0.4571

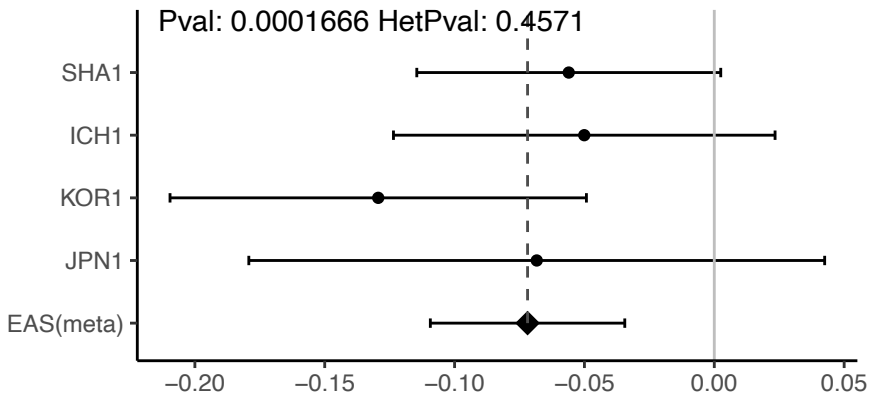

Pval: 1.03e-23 HetPval: 1.4e-01 logBF: 21

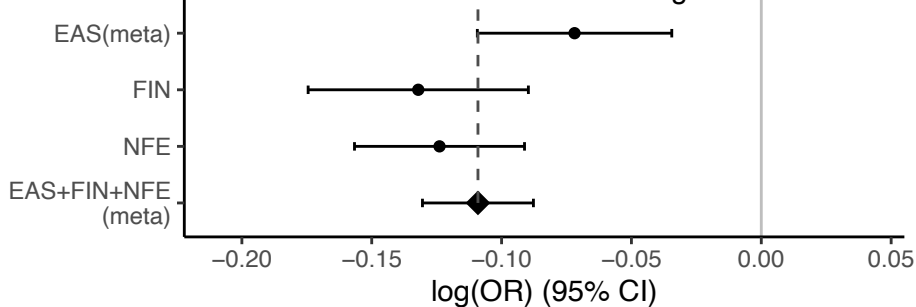

# IBD

chr1:22384384:G:C rs34963268 ZBTB40

Reference allele: G Effect allele: C

Reported: NFE

Source: EUR+EAS

Pval:  $3.149 \times 10^{-6}$  HetPval: 0.9555

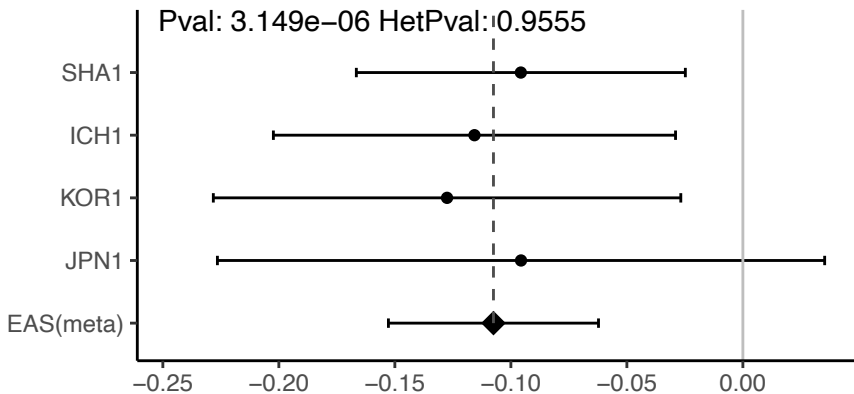

Pval:  $2.92 \times 10^{-25}$  HetPval:  $6.66 \times 10^{-1}$  logBF: 23

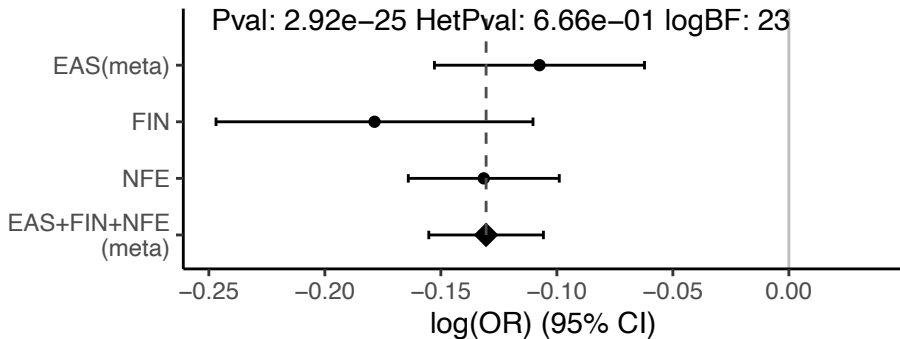

# IBD

chr1:67242007:G:A rs11581607 IL23R

Reference allele: G Effect allele: A

Reported: NFE,EAS

Source: EUR+EAS

Pval: - HetPval: -

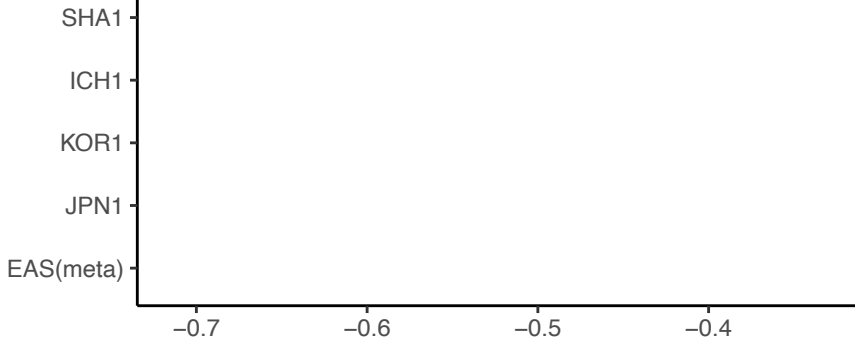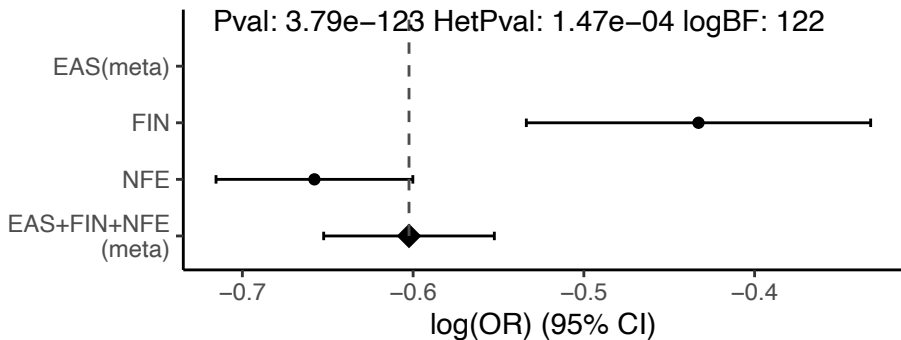

# IBD

chr1:91758790:G:A rs11165441 TGFB3

Reference allele: G Effect allele: A

Reported: NFE

Source: EUR+EAS

Pval: 4.429e-06 HetPval: 0.7559

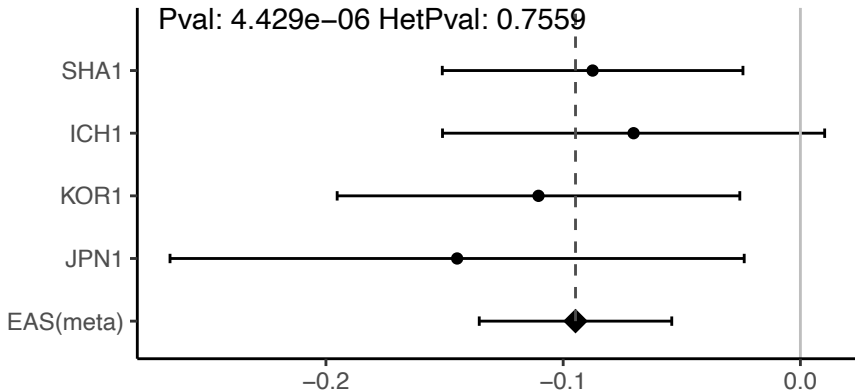

Pval: 4.45e-08 HetPval: 5.58e-01 logBF: 5.4

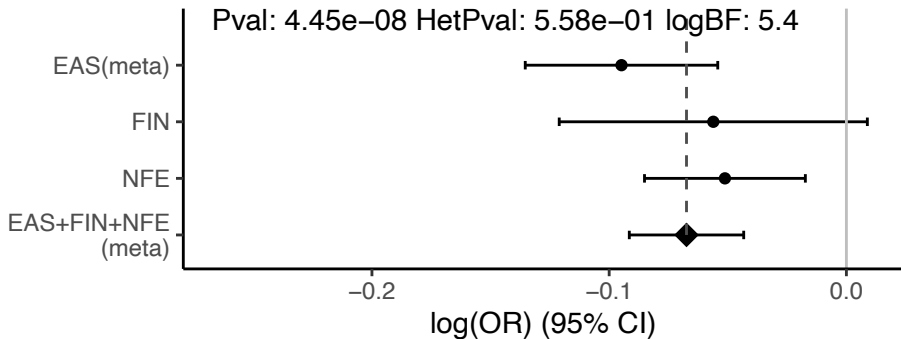

# IBD

chr1:108112400:A:C rs17572009 SLC25A24

Reference allele: A Effect allele: C

Reported: NEW

Source: EUR+EAS

Pval: 0.0004373 HetPval: 0.4699

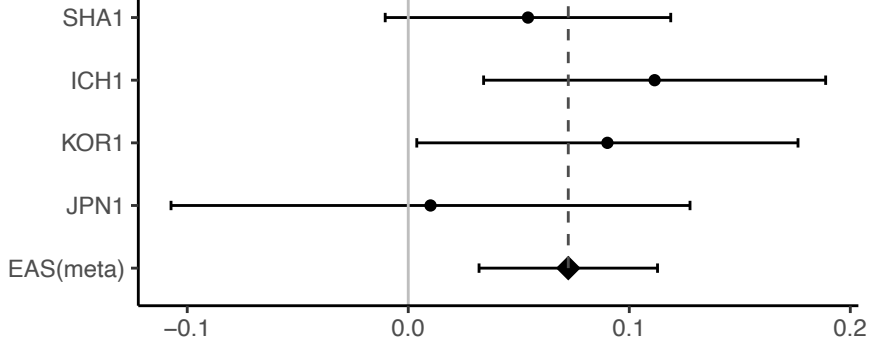

Pval: 6.49e-10 HetPval: 2.6e-01 logBF: 7.8

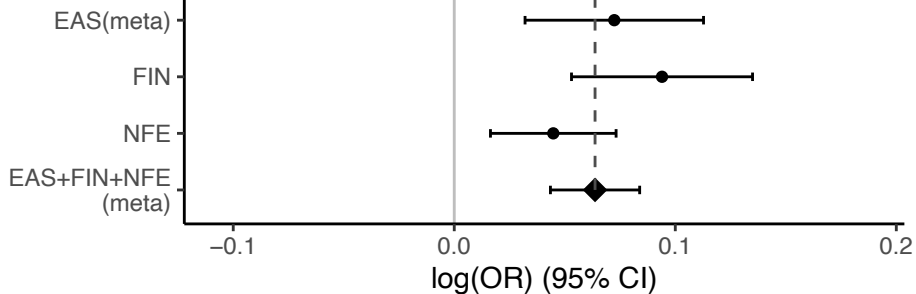

# IBD

chr1:119982857:G:T rs116062645 NOTCH2

Reference allele: G Effect allele: T

Reported: NFE

Source: EUR+EAS

Pval: - HetPval: -

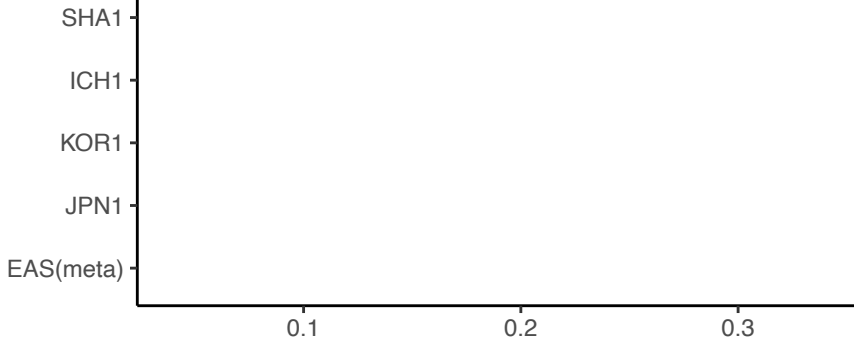

Pval: 2.63e-09 HetPval: 1.21e-01 logBF: 7.2

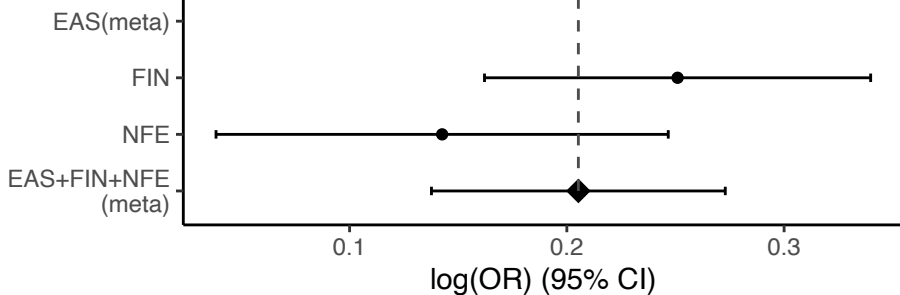

# IBD

chr1:150706557:G:A rs1336900 *HORMAD1*

Reference allele: G Effect allele: A

Reported: NEW

Source: EUR+EAS

Pval: 0.005996 HetPval: 0.1161

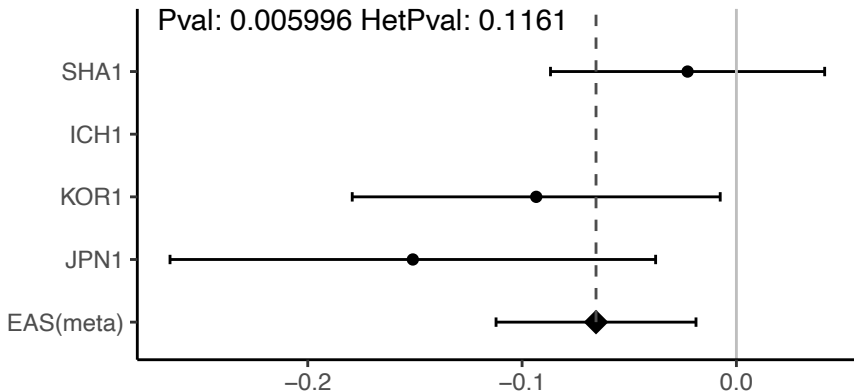

Pval: 4.11e-15 HetPval: 2.59e+01 logBF: 13

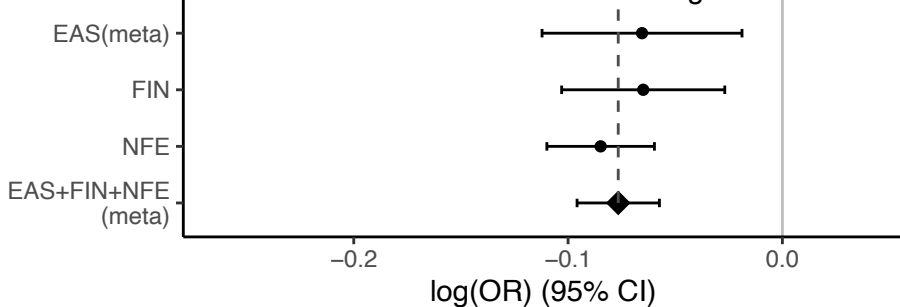

# IBD

chr1:151820698:G:T rs11204894 RORC

Reference allele: G Effect allele: T

Reported: NFE

Source: EUR+EAS

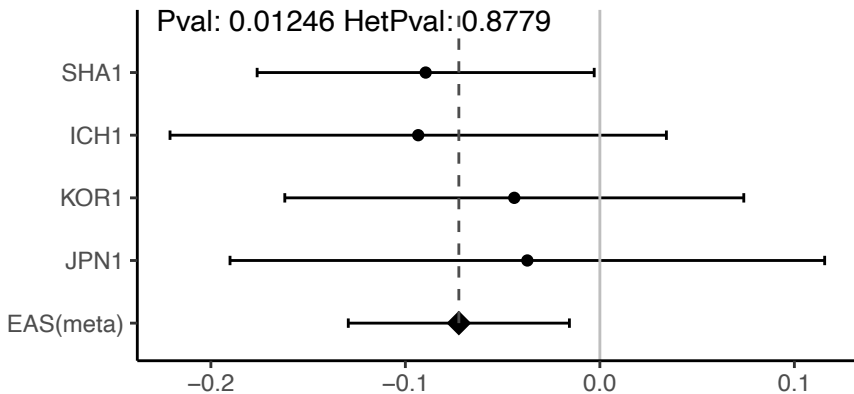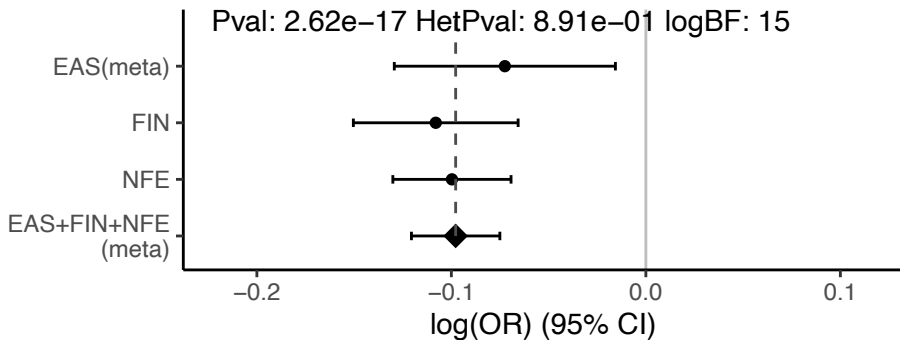



# IBD

chr1:154962487:G:A rs3766920 SHC1

Reference allele: G Effect allele: A

Reported: NFE,EAS

Source: EUR+EAS

Pval:  $1.146e-13$  HetPval: 0.1869

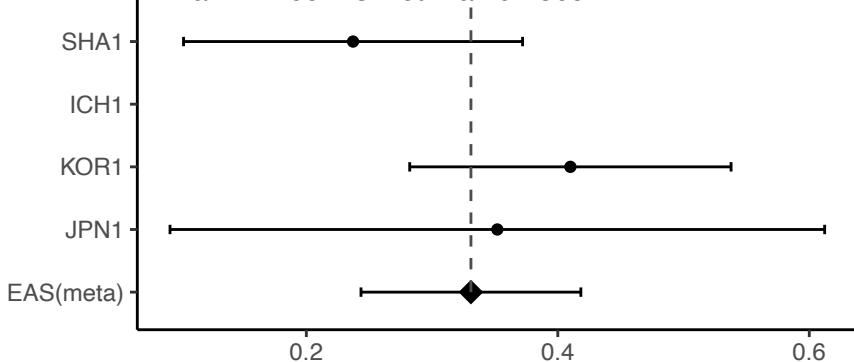

Pval:  $1.15e-13$  HetPval:  $1.87e-01$  logBF: 11

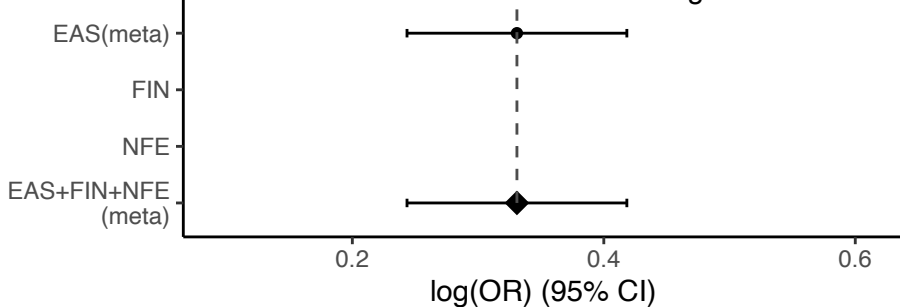

# IBD

chr1:197676319:T:A rs2224873 DENND1B

Reference allele: T Effect allele: A

Reported: NFE

Source: EUR+EAS

Pval: 0.0004765 HetPval: 0.6697

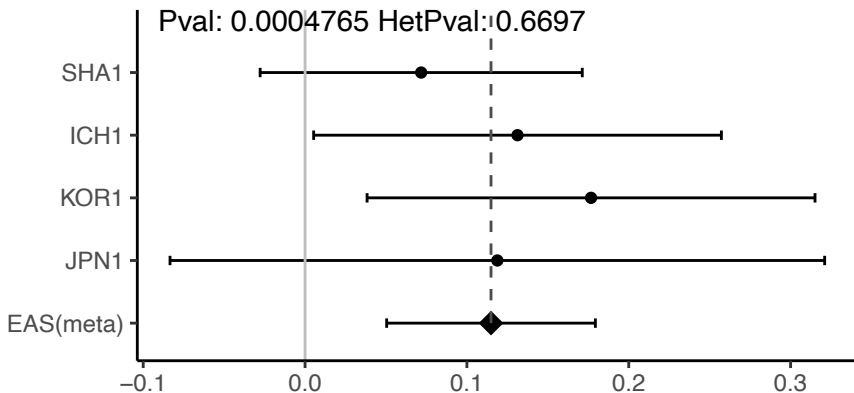

Pval: 1.42e-15 HetPval: 7.04e-01 logBF: 13

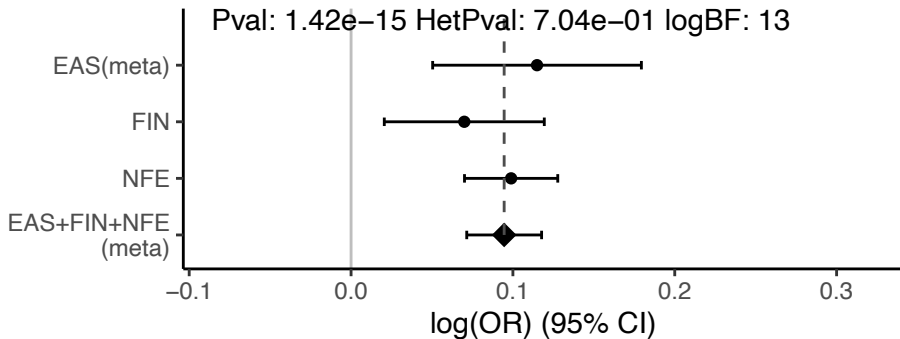

# IBD

chr1:198689168:TA:T rs74359027 PTPRC

Reference allele: TA Effect allele: T

Reported: NFE

Source: EUR+EAS

Pval: 1.202e-05 HetPval: 0.8031

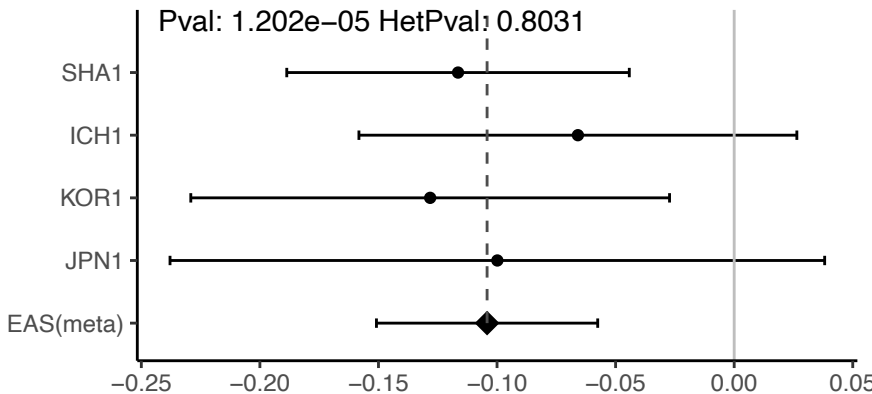

Pval: 1.3e-12 HetPval: 8.15e-01 logBF: 11

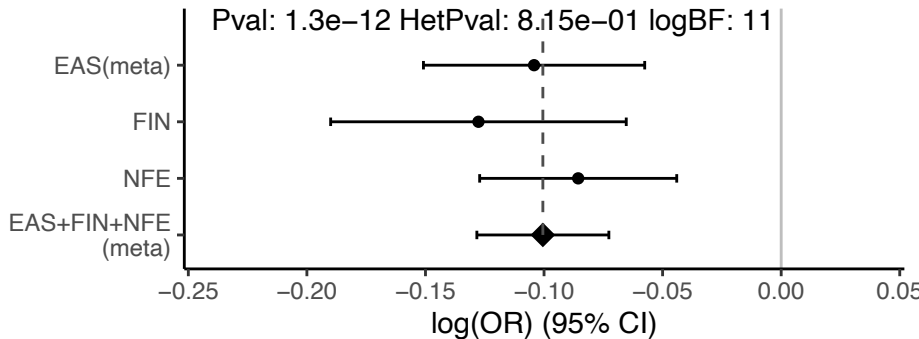

# IBD

chr1:200905101:G:C rs35730213 INAVA

Reference allele: G Effect allele: C

Reported: NFE

Source: EUR+EAS

Pval: 0.002506 HetPval: 0.6093

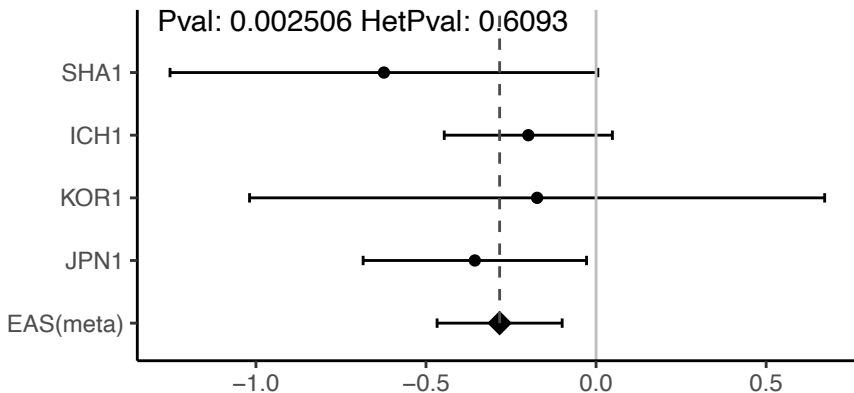

Pval: 5.84e-34 HetPval: 3.52e-01 logBF: 31

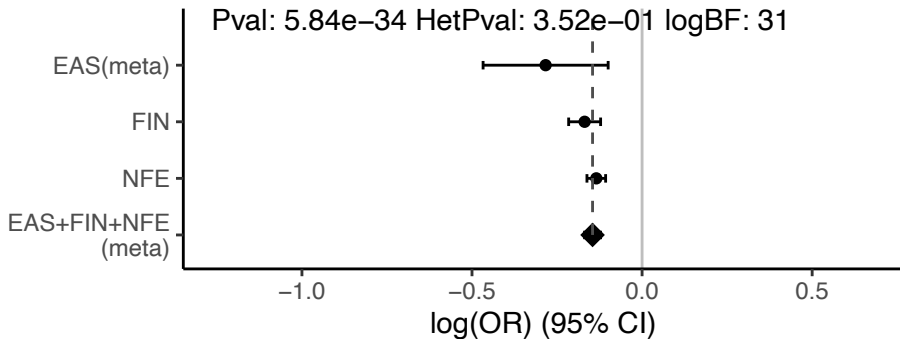

# IBD

chr1:206769068:C:T rs3024495 IL10

Reference allele: C Effect allele: T

Reported: NFE

Source: EUR+EAS

Pval: 5.007e-06 HetPval: 0.6299

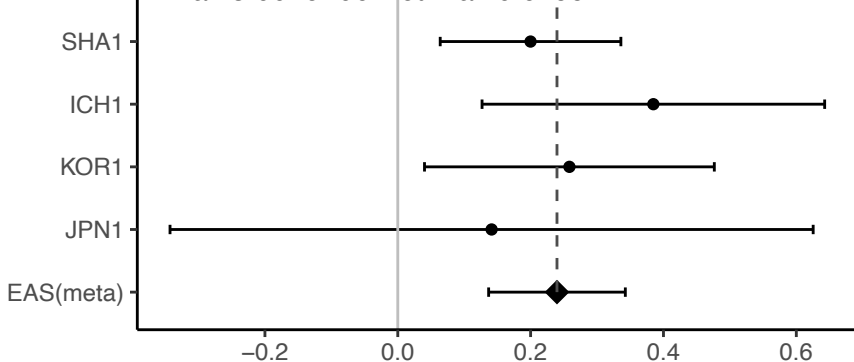

Pval: 5.17e-55 HetPval: 4.82e-01 logBF: 52

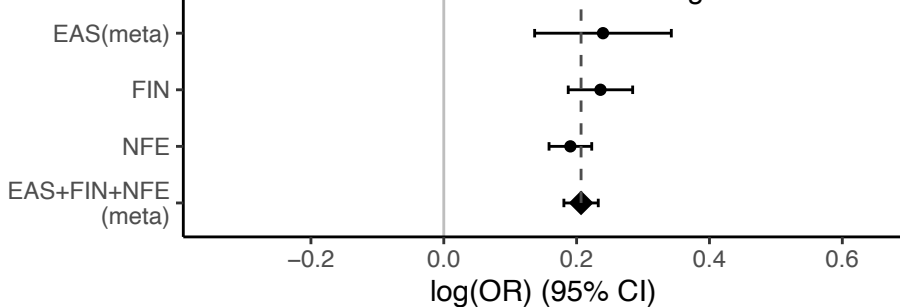

# IBD

chr1:209802870:G:A rs2073486 IRF6

Reference allele: G Effect allele: A

Reported: NFE

Source: EUR+EAS

Pval: 0.9643 HetPval: 0.6682

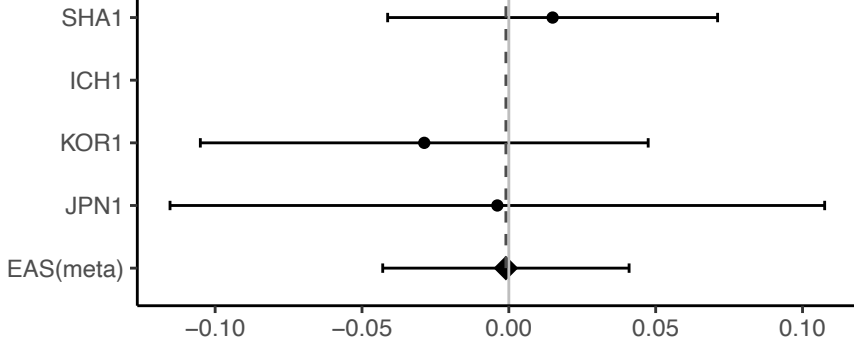

Pval: 1.66e-08 HetPval: 4.66e-02 logBF: 6.8

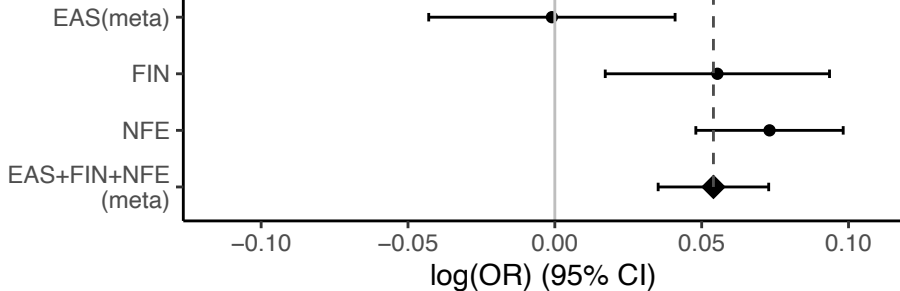

# IBD

chr1:234599210:C:T rs10910476 IRF2BP2

Reference allele: C Effect allele: T

Reported: NEW

Source: EUR+EAS

Pval: 0.08542 HetPval: 0.2374

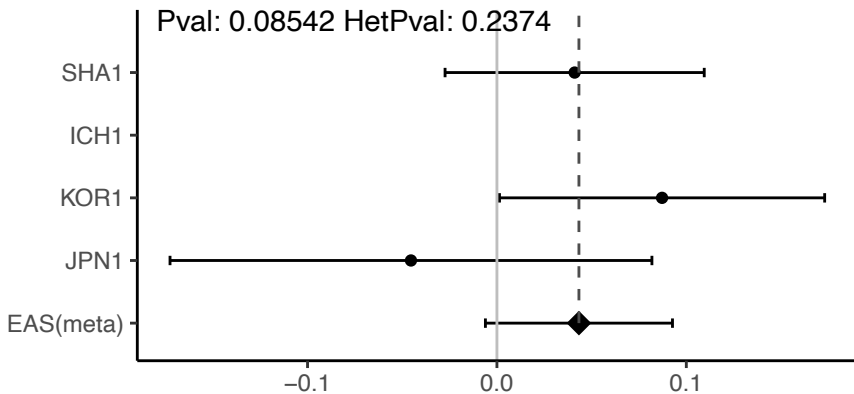

Pval: 7.06e-11 HetPval: 4.44e-01 |logBF: 8.7

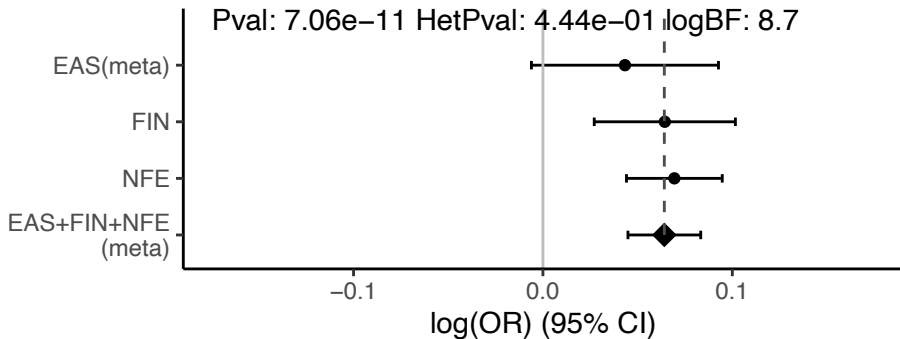

# IBD

chr2:25265950:T:A rs7578575 DNMT3A

Reference allele: T Effect allele: A

Reported: NFE

Source: EUR+EAS

Pval: 0.01006 HetPval: 0.389

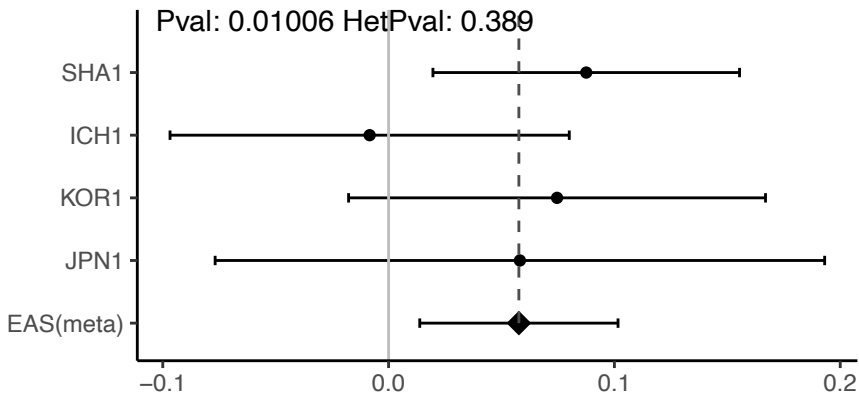

Pval: 1.54e-15 HetPval: 4.97e+01 logBF: 13

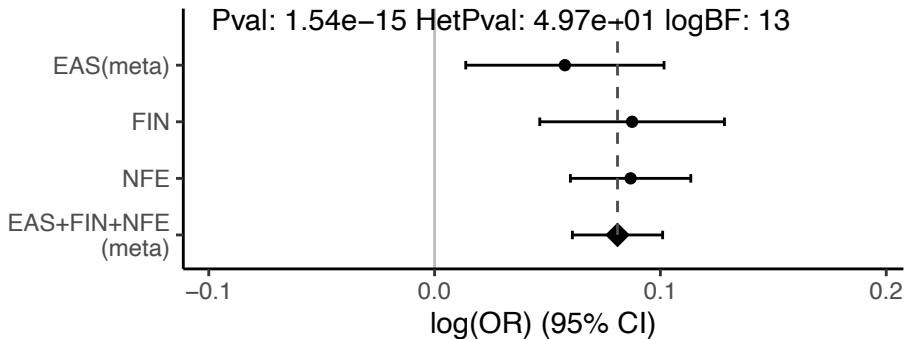



# IBD

chr2:60960280:G:C rs67927699 PUS10

Reference allele: G Effect allele: C

Reported: NFE

Source: EUR+EAS

Pval:  $2.837e-07$  HetPval: 0.7728

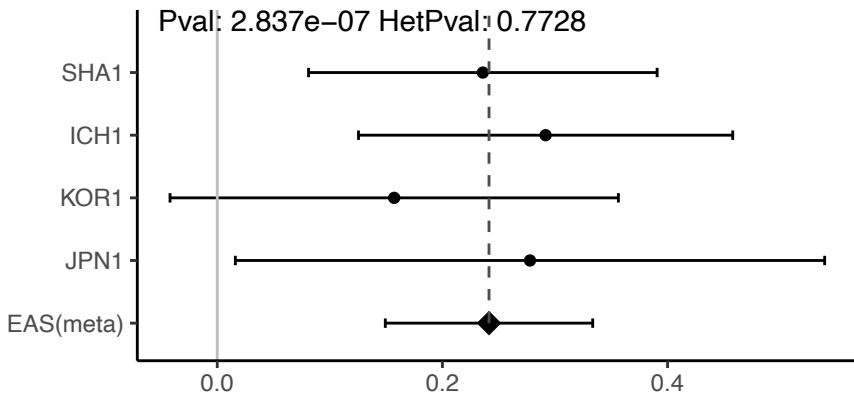

Pval:  $4.07e-37$  HetPval:  $5.68e-02$  logBF: 35

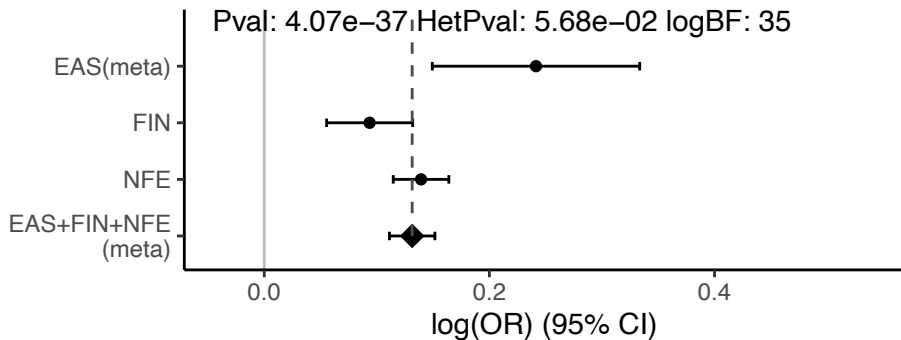

# IBD

chr2:65453176:T:G rs1370394 SPRED2

Reference allele: T Effect allele: G

Reported: NFE

Source: EUR+EAS

Pval:  $8.676e-09$  HetPval: 0.06693

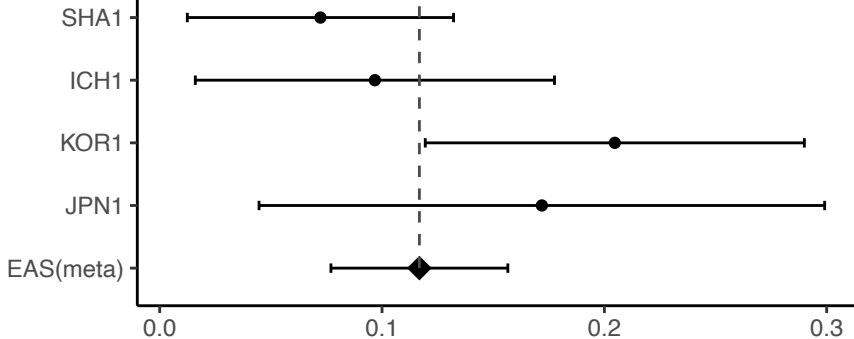

Pval:  $8.55e-11$  HetPval:  $6.49e-03$  logBF: 9.4

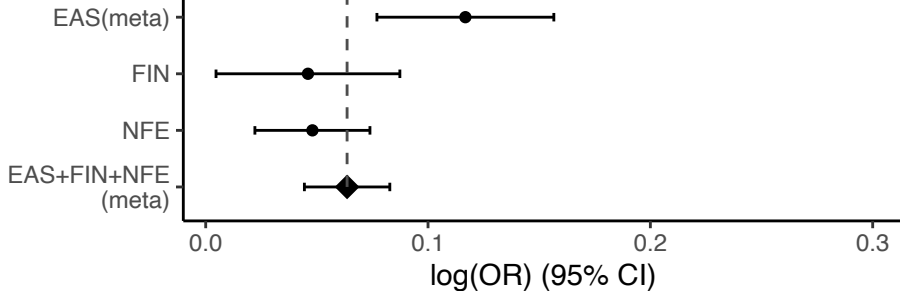

# IBD

chr2:102368211:T:A rs1882348 IL18R1

Reference allele: T Effect allele: A

Reported: NFE

Source: EUR+EAS

Pval:  $5.764e-14$  HetPval: 0.3626

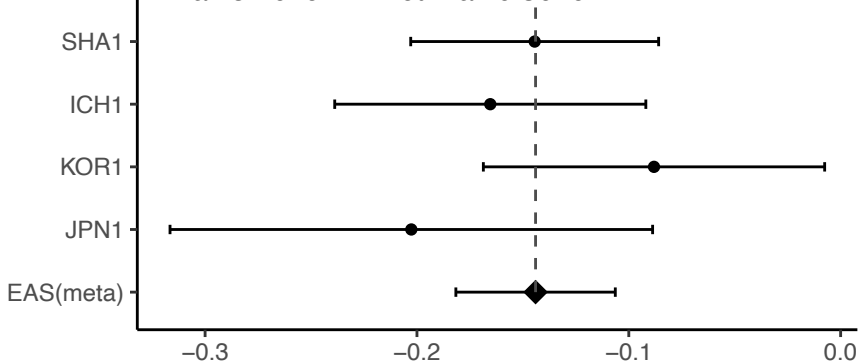

Pval:  $1.6e-26$  HetPval:  $6.32e-02$  logBF: 24

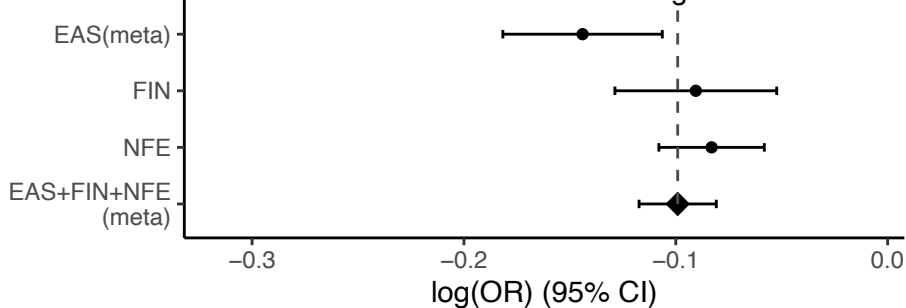

# IBD

chr2:127092119:T:C rs55678466 BIN1

Reference allele: T Effect allele: C

Reported: NEW

Source: EUR+EAS

Pval: 0.1063 HetPval: 0.7172

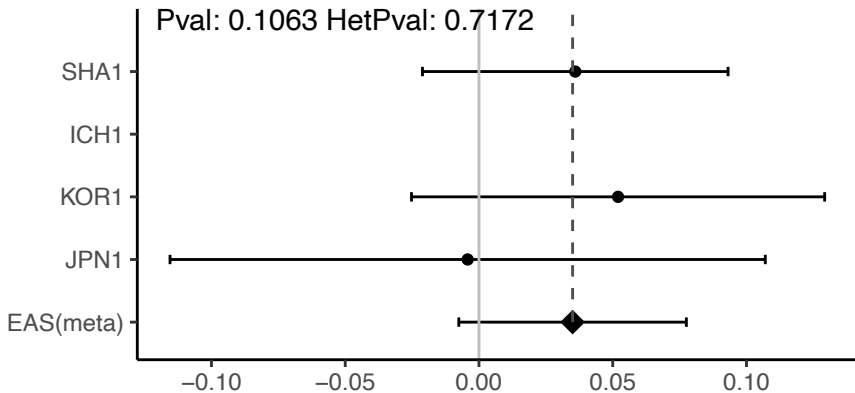

Pval: 2.49e-08 HetPval: 2.25e-01 logBF: 6.2

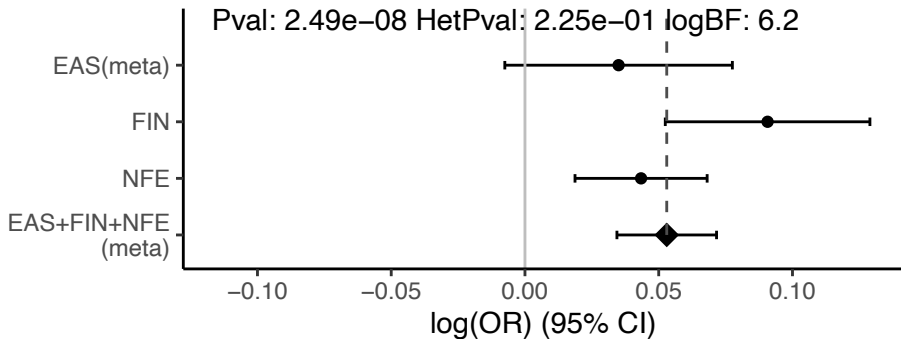

# IBD

chr2:144784617:T:C rs56862595 TEX41

Reference allele: T Effect allele: C

Reported: NFE

Source: EUR+EAS

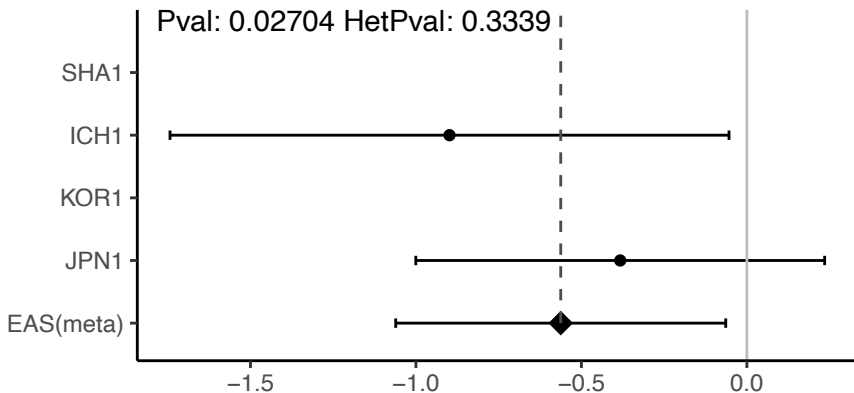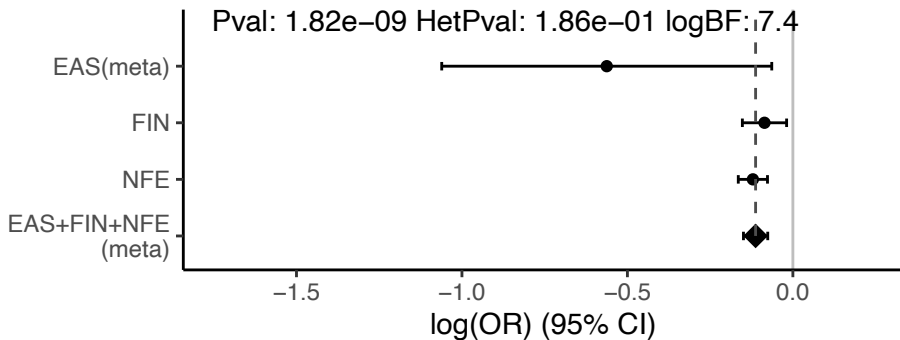

# IBD

chr2:162254026:A:G rs2111485 FAP

Reference allele: A Effect allele: G

Reported: NFE

Source: EUR+EAS

Pval: 0.01936 HetPval: 0.9355

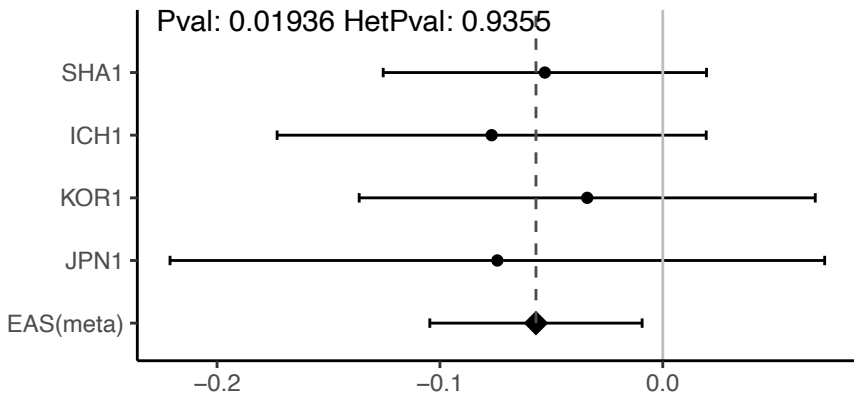

Pval: 3.39e-11 HetPval: 7.78e-01 logBF: 9.1

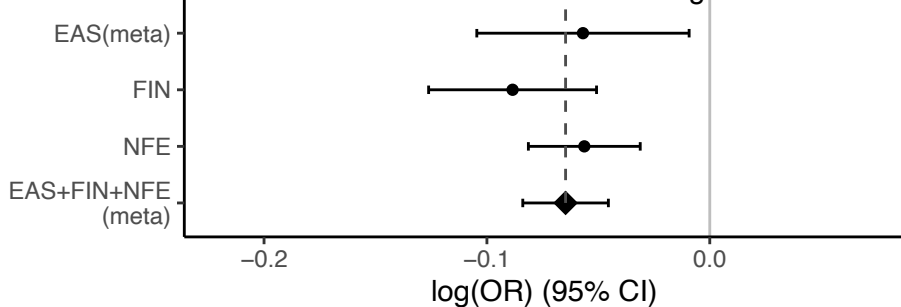

# IBD

chr2:181463487:G:A rs2124440 ITGA4

Reference allele: G Effect allele: A

Reported: NFE

Source: EUR+EAS

Pval: 0.03786 HetPval: 0.1007

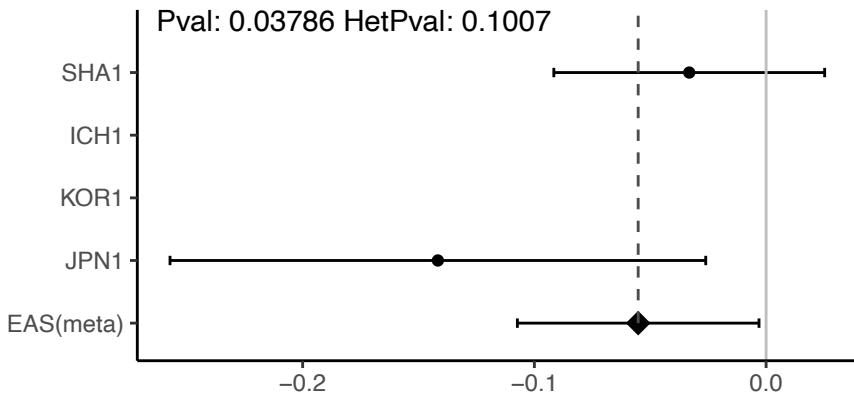

Pval: 3.98e-17 HetPval: 2.75e-01 logBF: 15

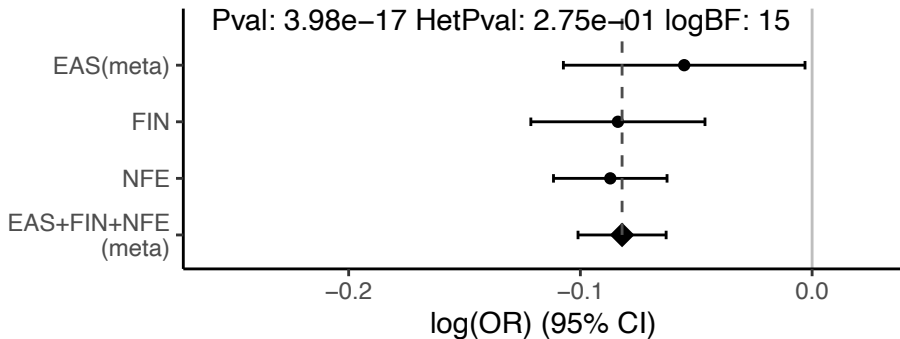

# IBD

chr2:186665389:C:G rs2595392 ITGAV

Reference allele: C Effect allele: G

Reported: NFE

Source: EUR+EAS

Pval: - HetPval: -

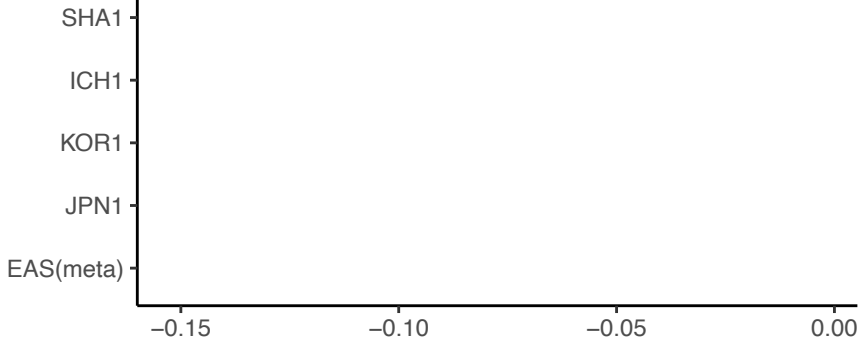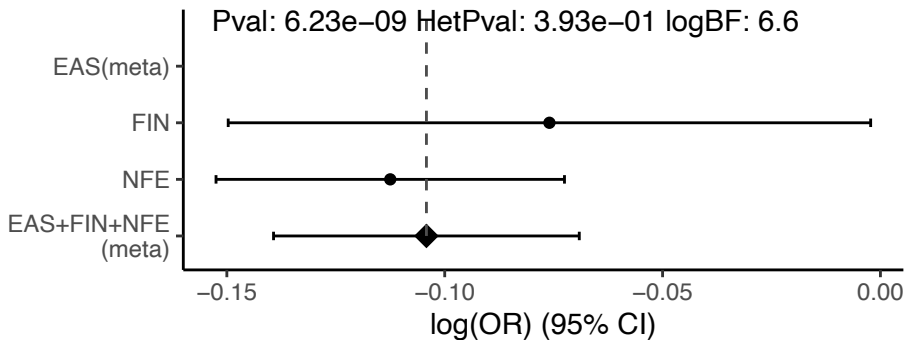



# IBD

chr2:203720036:T:C rs3769684 CD28

Reference allele: T Effect allele: C

Reported: NFE

Source: EUR+EAS

Pval: 1.922e-09 HetPval: 0.2924

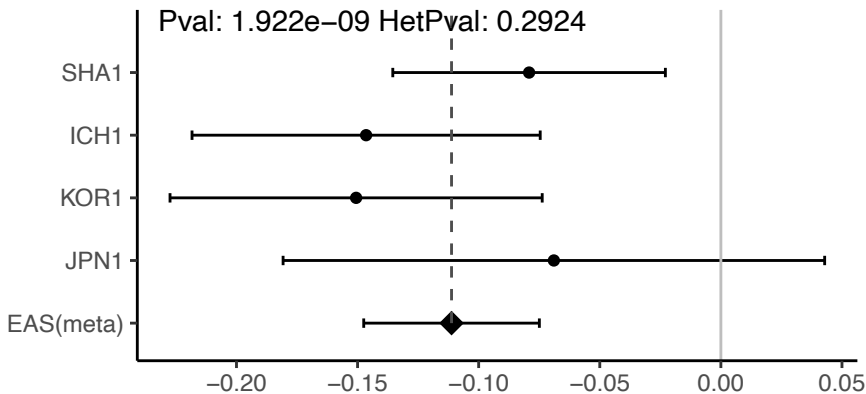

Pval: 1.55e-12 HetPval: 2.81e-01 logBF: 10

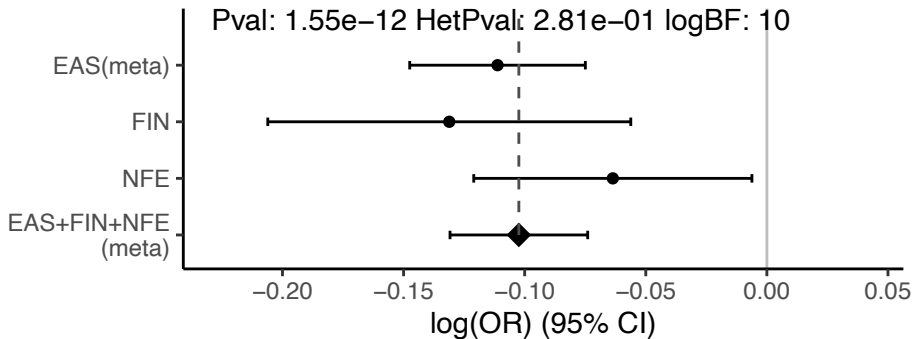

# IBD

chr2:218152739:A:G rs11690316 CXCR1

Reference allele: A Effect allele: G

Reported: NFE

Source: EUR+EAS

Pval:  $1.442e-06$  HetPval: 0.3866

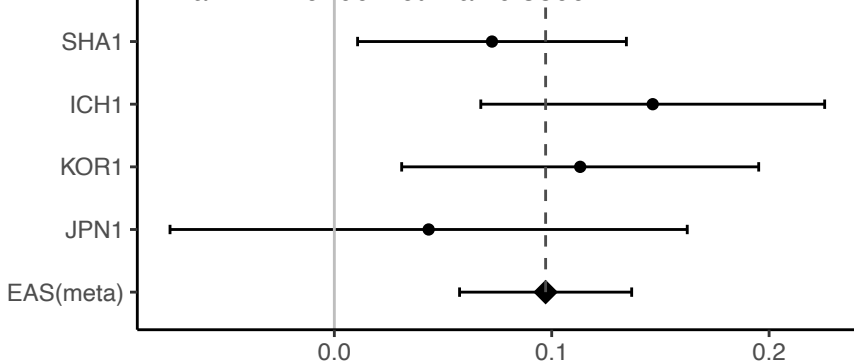

Pval:  $4.56e-18$  HetPval:  $5.58e-01$  logBF: 15

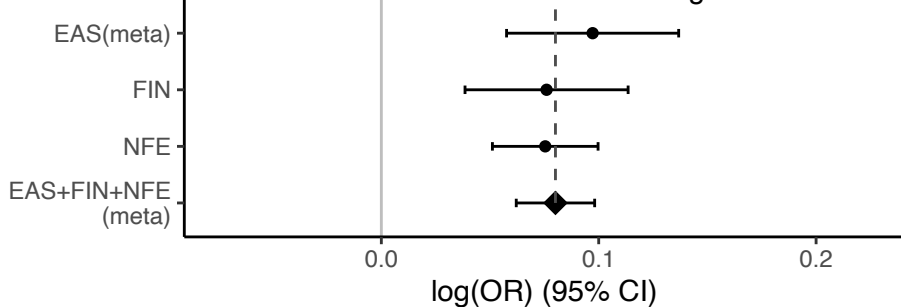

# IBD

chr2:227795646:C:T rs4973341 CCL20

Reference allele: C Effect allele: T

Reported: NFE

Source: EUR+EAS

Pval:  $2.377e-10$  HetPval: 0.2861

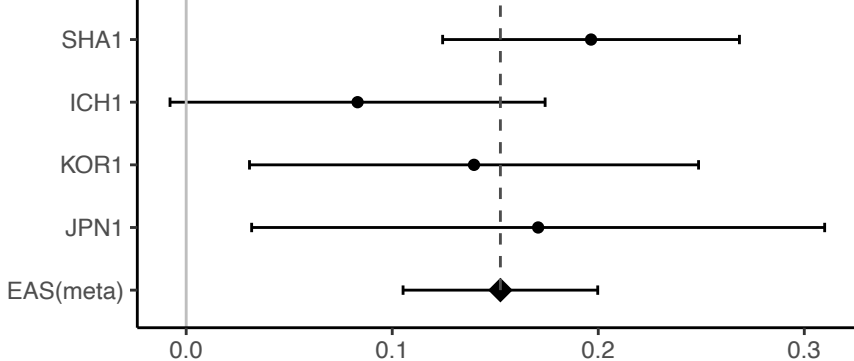

Pval:  $1.8e-13$  HetPval:  $4.49e-03$  logBF: 13

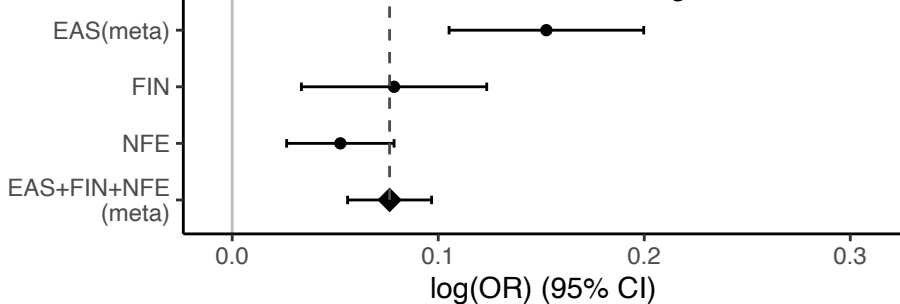

# IBD

chr2:240628909:C:T rs34236350 GPR35

Reference allele: C Effect allele: T

Reported: NFE,EAS

Source: EUR+EAS

Pval:  $5.517e-28$  HetPval: 0.6481

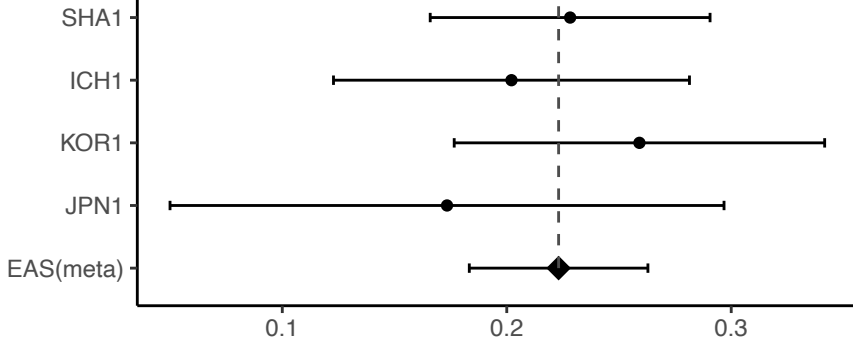

Pval:  $7.71e-54$  HetPval:  $1.62e-02$  logBF: 51

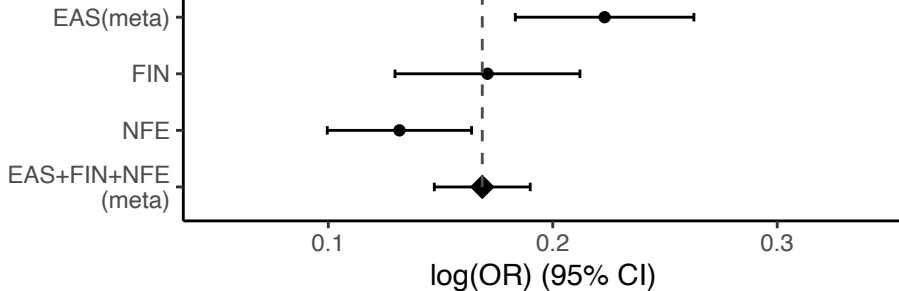

# IBD

chr2:241546197:C:T rs115622046 BOK

Reference allele: C Effect allele: T

Reported: NFE

Source: EUR+EAS

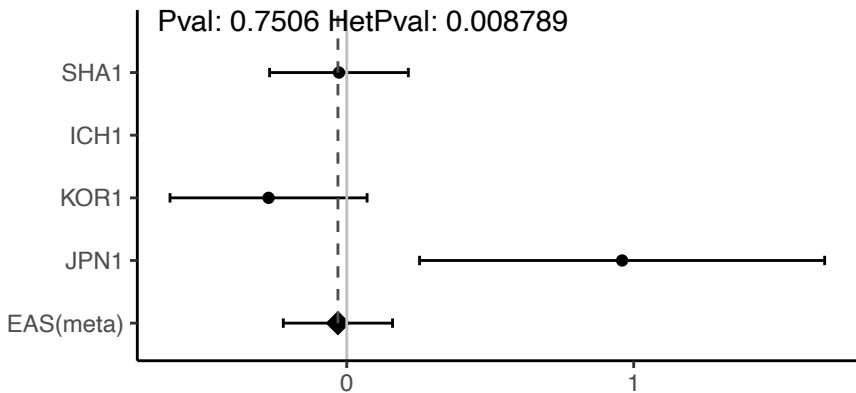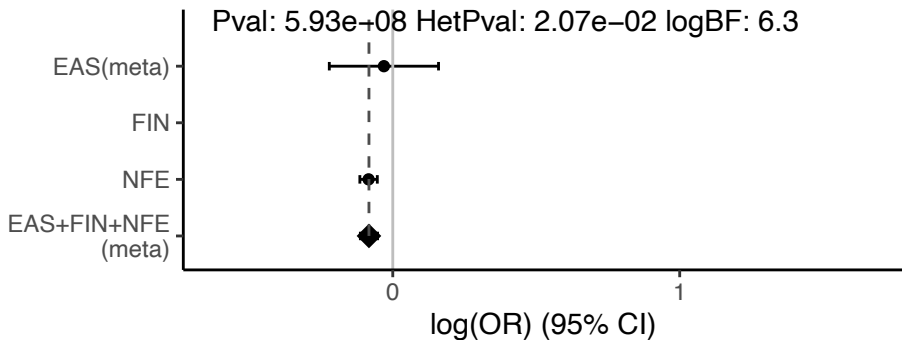

# IBD

chr3:30608835:T:C rs6770038 TGFBR2

Reference allele: T Effect allele: C

Reported: NEW

Source: EUR+EAS

Pval: 0.00552 HetPval: 0.1848

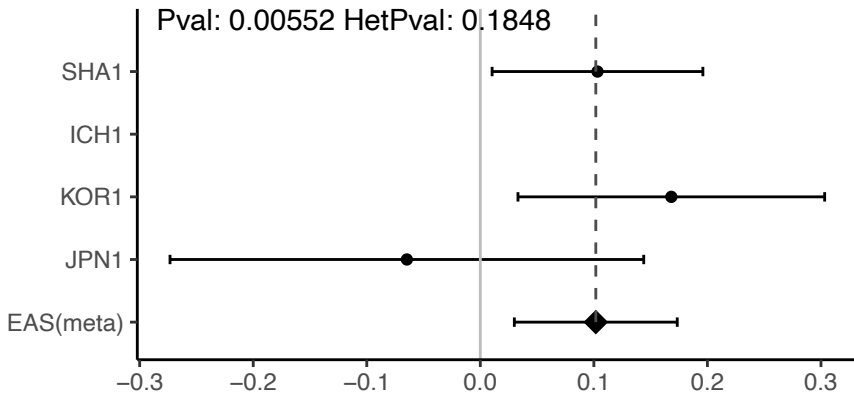

Pval: 4.36e-08 HetPval: 3.62e-02 logBF: 6.1

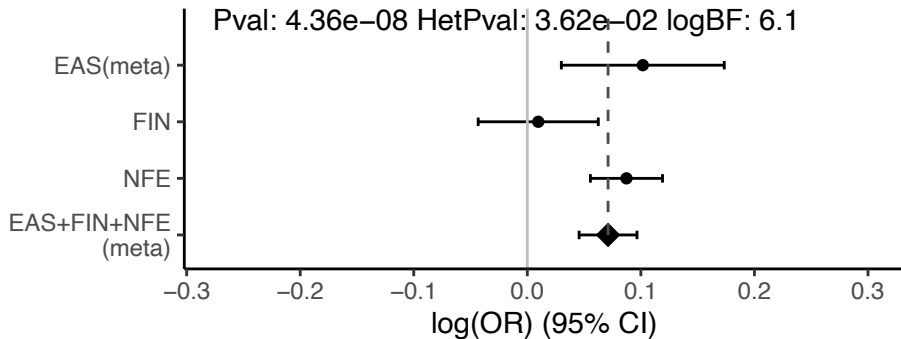

# IBD

chr3:49676792:T:C rs1131095 APEH

Reference allele: T Effect allele: C

Reported: NFE

Source: EUR+EAS

Pval: 3.458e-06 HetPval: 0.5739

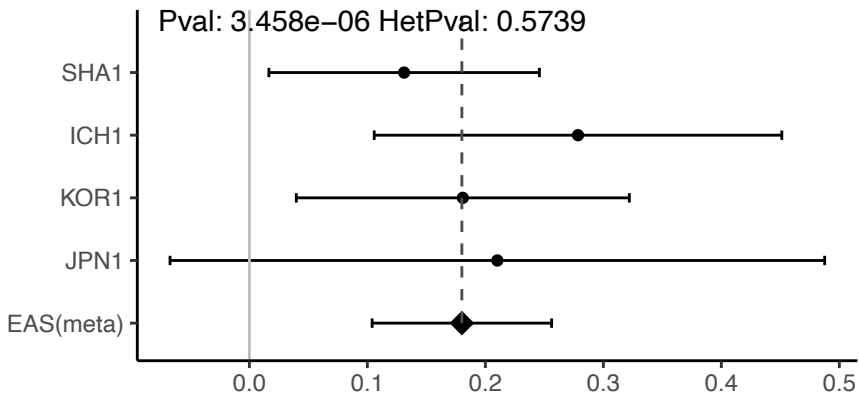

Pval: 1.93e-55 HetPval: 8.16e-01 logBF: 53

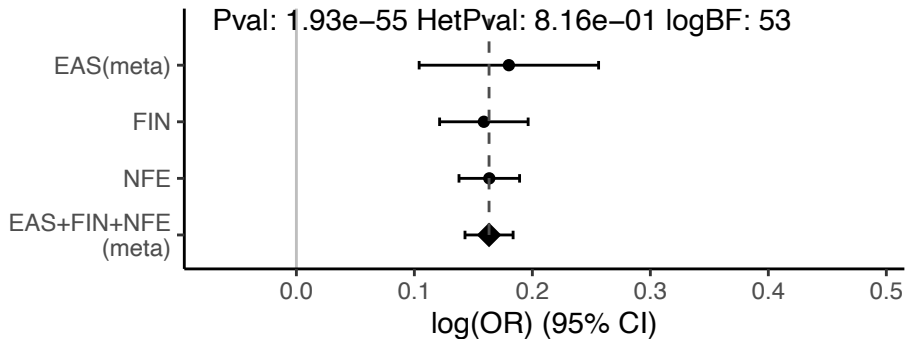

# IBD

chr3:71126344:C:T rs2593855 FOXP1

Reference allele: C Effect allele: T

Reported: NFE

Source: EUR+EAS

Pval: 0.02986 HetPval: 0.1696

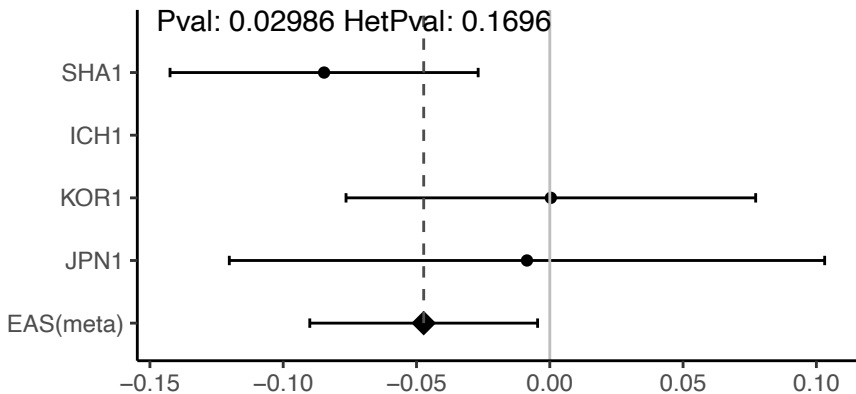

Pval: 6.68e-10 HetPval: 1.4e-01 logBF: 7.8

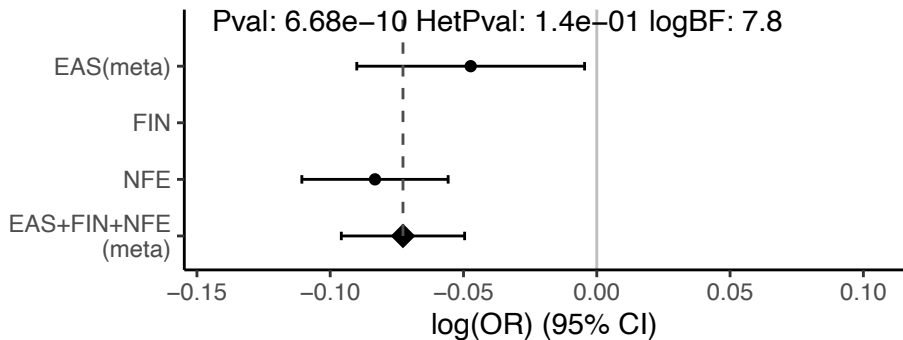



# IBD

chr3:101850882:A:C rs616597 NFKBIZ

Reference allele: A Effect allele: C

Reported: NFE

Source: EUR+EAS

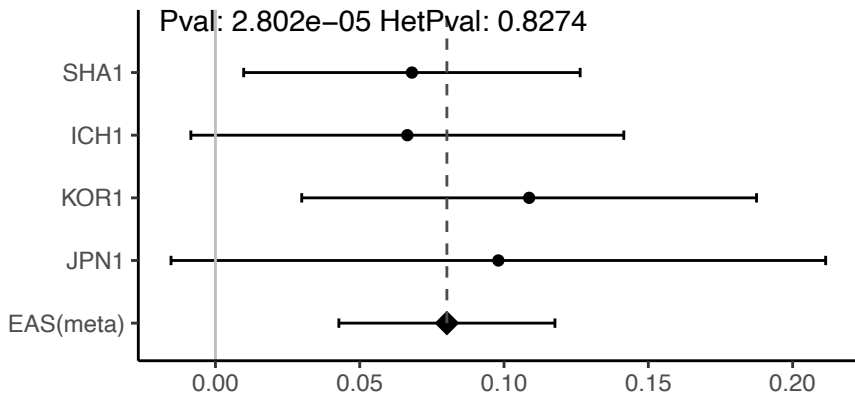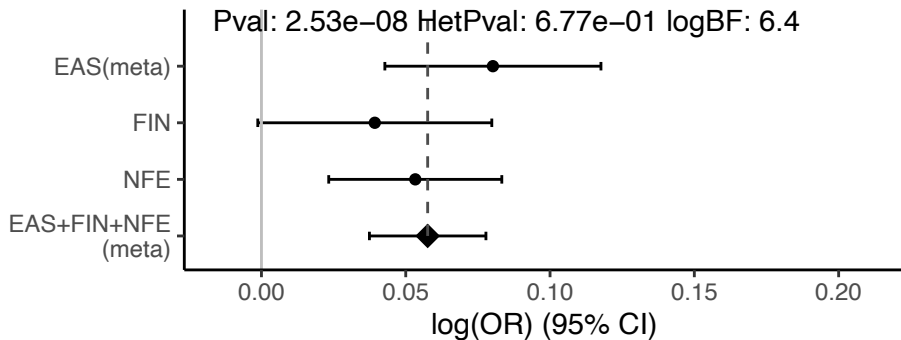

# IBD

chr3:188683372:C:T rs56116661 LPP

Reference allele: C Effect allele: T

Reported: NFE

Source: EUR+EAS

Pval: 0.9922 HetPval: 0.4717

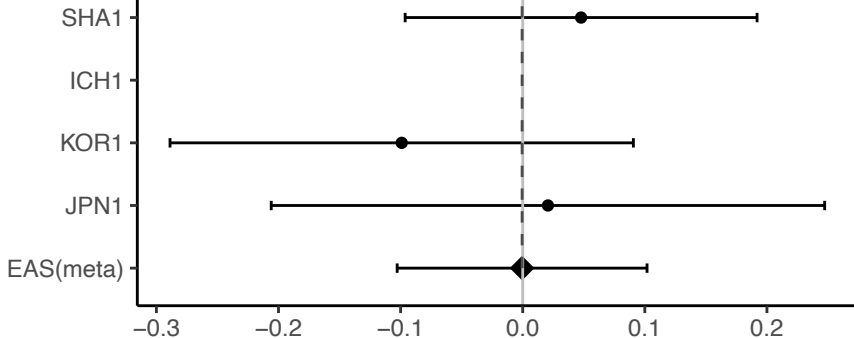

Pval:  $3.73e-15$  HetPval:  $1.77e-01$  logBF: 13

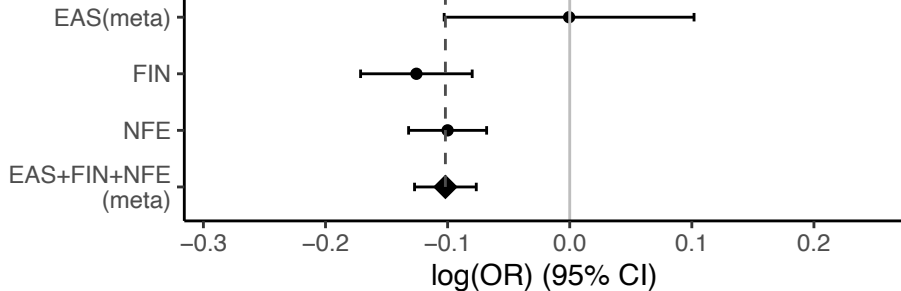

# IBD

chr4:3447925:G:A rs16844401 HGFAC

Reference allele: G Effect allele: A

Reported: NFE

Source: EUR+EAS

Pval:  $8.786e-06$  HetPval: 0.1159

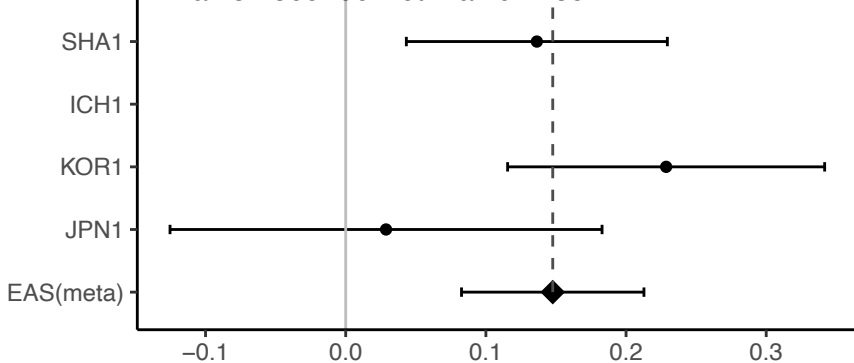

Pval:  $1.12e-12$  HetPval:  $1.83e-01$  logBF: 10

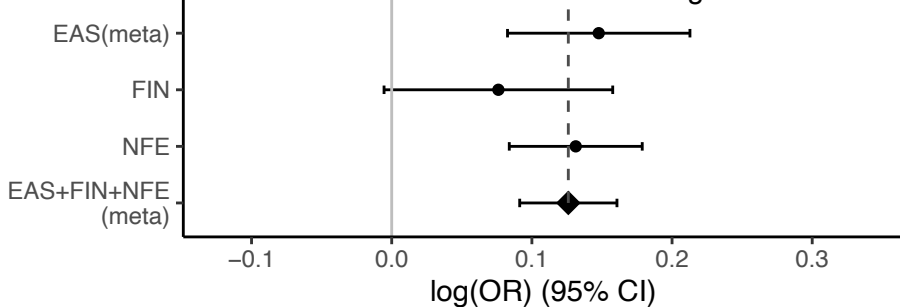

# IBD

chr4:36061370:A:G rs61797472 ARAP2

Reference allele: A Effect allele: G

Reported: NEW

Source: EUR+EAS

Pval: 0.0007537 HetPval: 0.2636

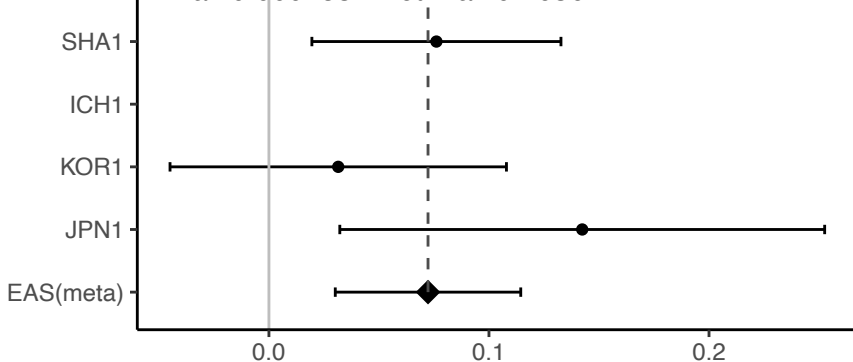

Pval: 6.31e-11 HetPval: 4.83e-01 logBF: 8.8

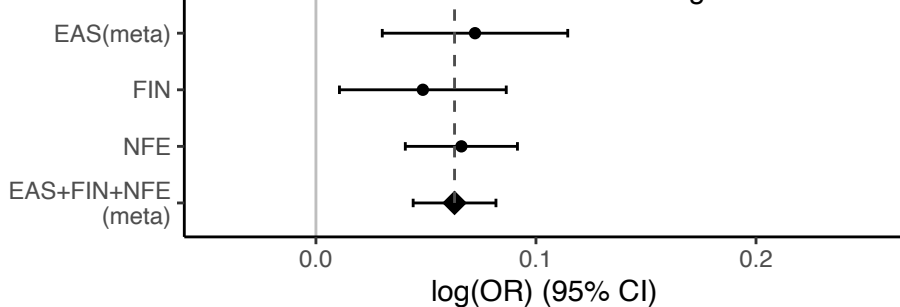

# IBD

chr4:38333446:G:A rs73243351 LINC02513

Reference allele: G Effect allele: A

Reported: NFE,EAS

Source: EUR+EAS

Pval:  $4.237e-23$  HetPval: 0.05878

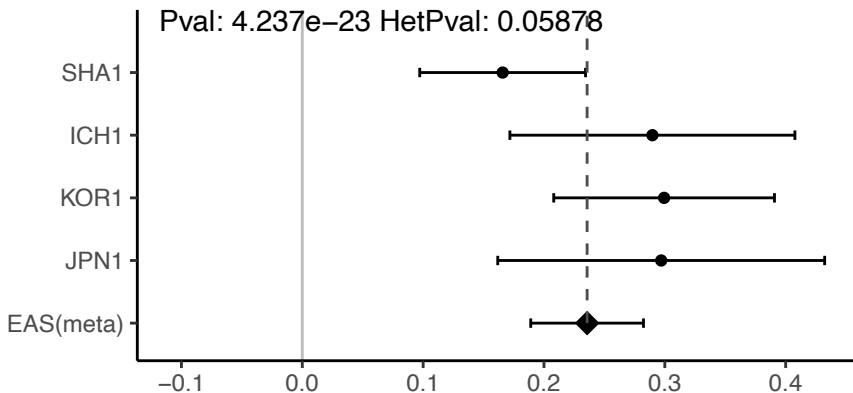

Pval:  $2.86e-22$  HetPval:  $1.34e-06$  logBF: 24

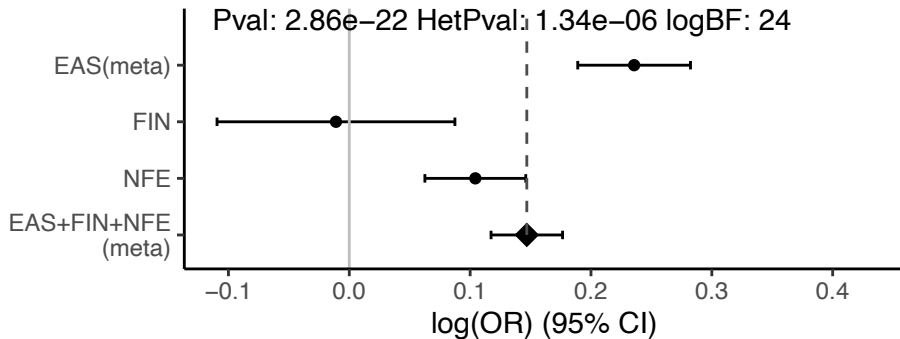

# IBD

chr4:105178652:T:C rs2903386 TET2

Reference allele: T Effect allele: C

Reported: NFE

Source: EUR+EAS

Pval:  $8.554e-07$  HetPval: 0.5033

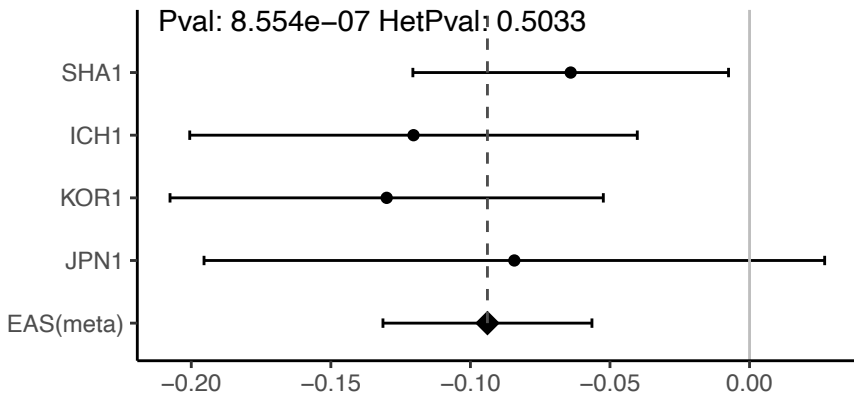

Pval:  $8.19e-14$  HetPval:  $4.73e-01$  logBF: 11

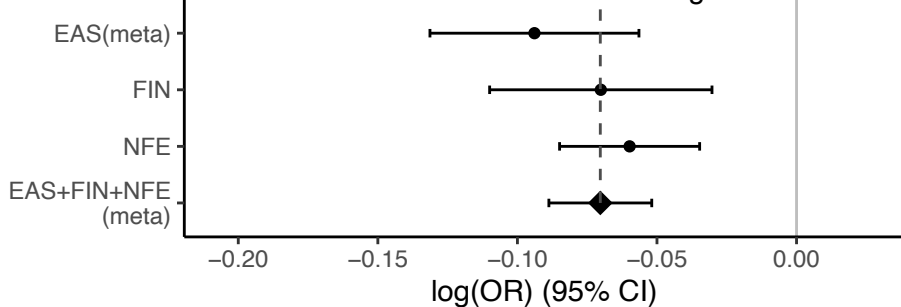

# IBD

chr4:122523884:G:GT rs147909357 IL2

Reference allele: G Effect allele: GT

Reported: NFE

Source: EUR+EAS

Pval:  $3.627e-11$  HetPval: 0.1047

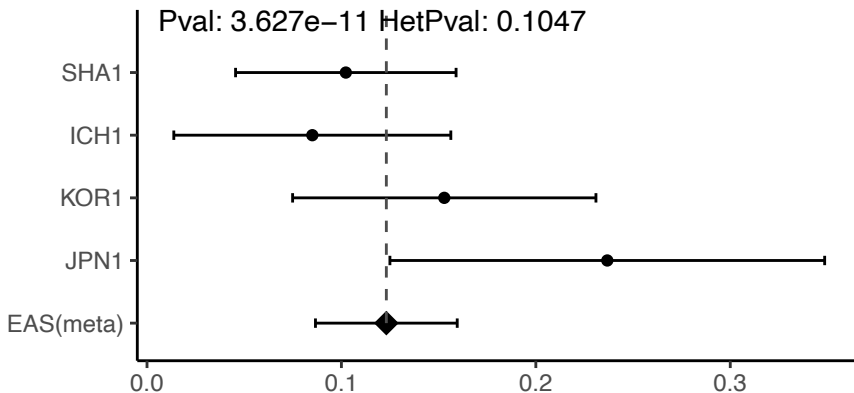

Pval:  $6.18e-19$  HetPval:  $1.52e-02$  logBF: 17

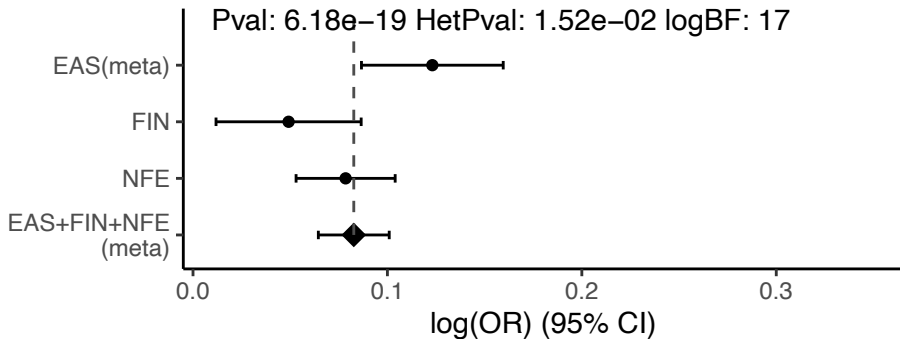

# IBD

chr5:10689450:T:G rs3776414 DAP

Reference allele: T Effect allele: G

Reported: NFE

Source: EUR+EAS

Pval:  $2.94e-06$  HetPval: 0.03618

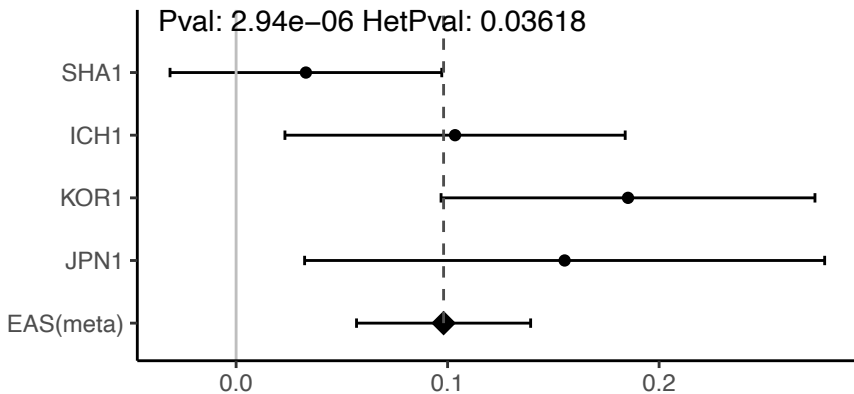

Pval:  $5.67e-14$  HetPval:  $5.67e-02$  logBF: 12

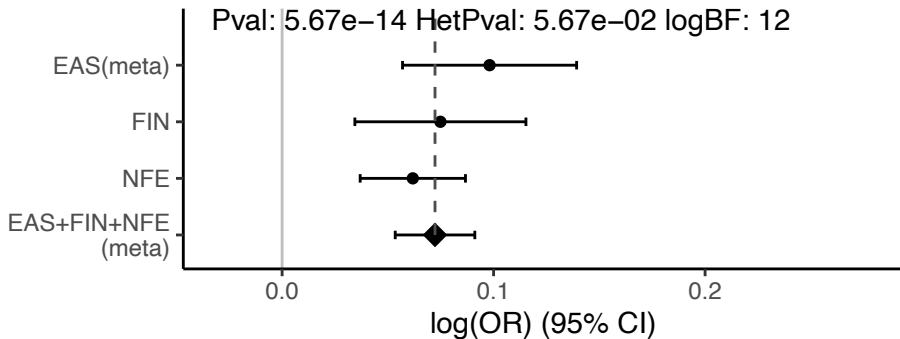



# IBD

chr5:38867630:C:T rs395157 OSMR

Reference allele: C Effect allele: T

Reported: NFE

Source: EUR+EAS

Pval: 0.0001555 HetPval: 0.009971

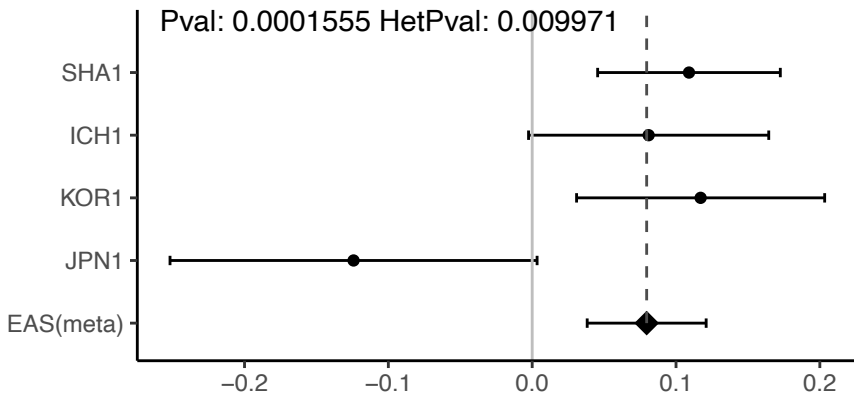

Pval:  $9.88e-17$  HetPval:  $4.44e-02$  logBF: 14

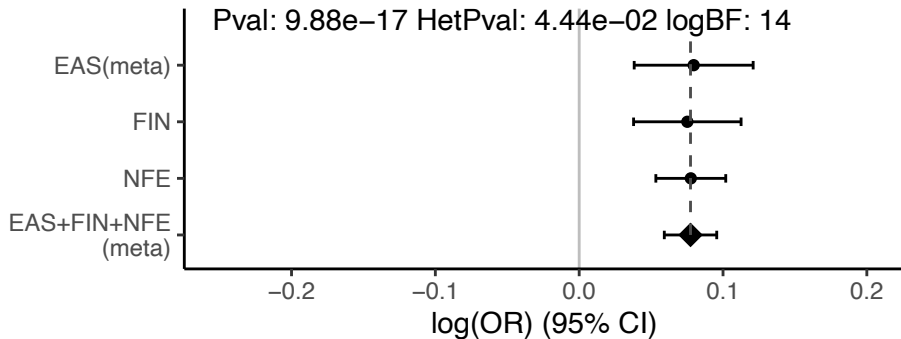

# IBD

chr5:40487168:C:T rs7725052 TTC33

Reference allele: C Effect allele: T

Reported: NFE

Source: EUR+EAS

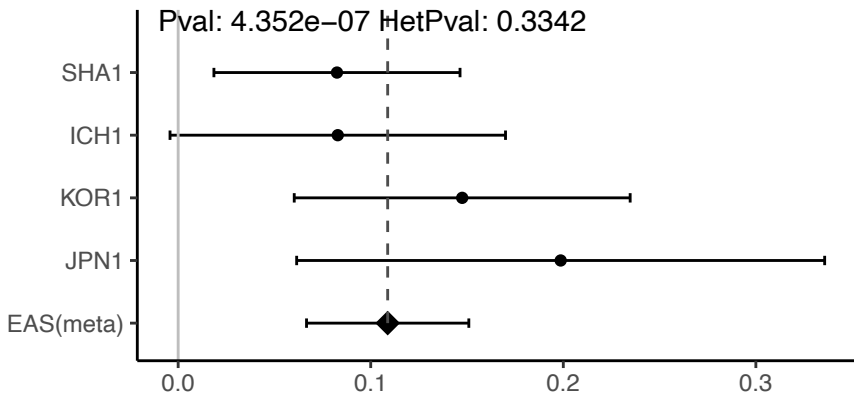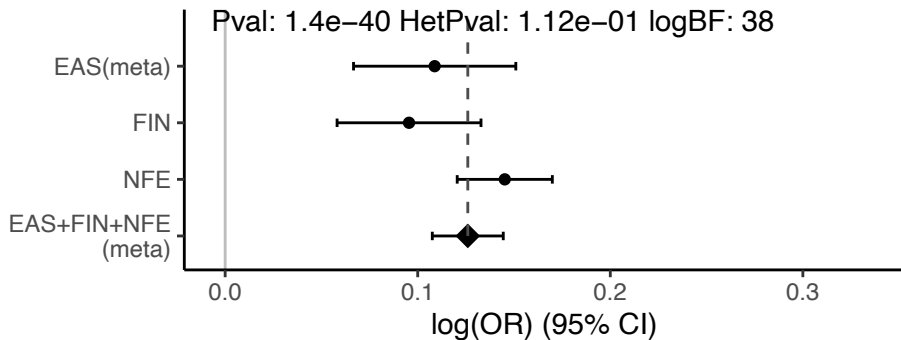

# IBD

chr5:80229545:A:G rs10041920 SERINC5

Reference allele: A Effect allele: G

Reported: NEW

Source: EUR+EAS

Pval:  $5.139 \times 10^{-5}$  HetPval: 0.6911

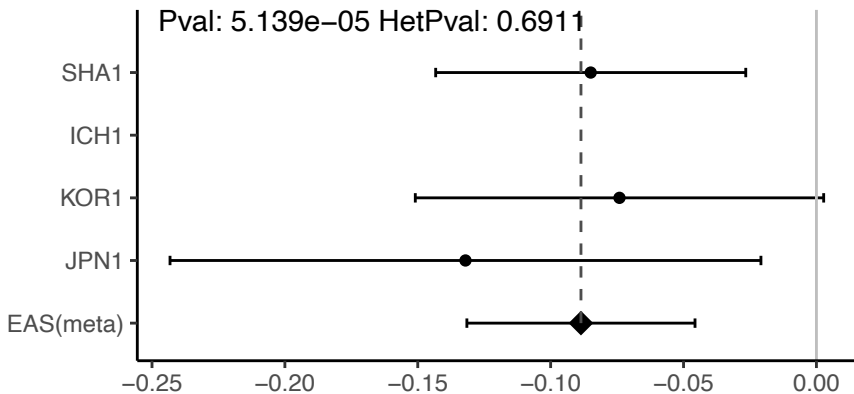

Pval:  $2.46 \times 10^{-8}$  HetPval:  $3.55 \times 10^{-1}$  logBF: 6.3

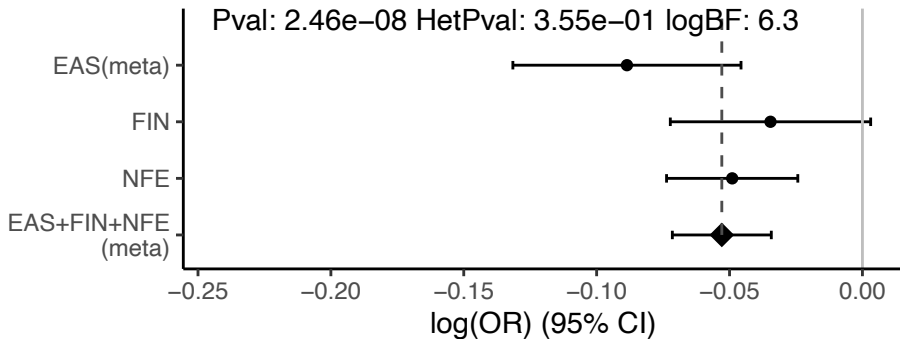

# IBD

chr5:112513193:C:T rs341295 EPB41L4A

Reference allele: C Effect allele: T

Reported: NEW

Source: EUR+EAS

Pval: 0.06205 HetPval: 0.7155

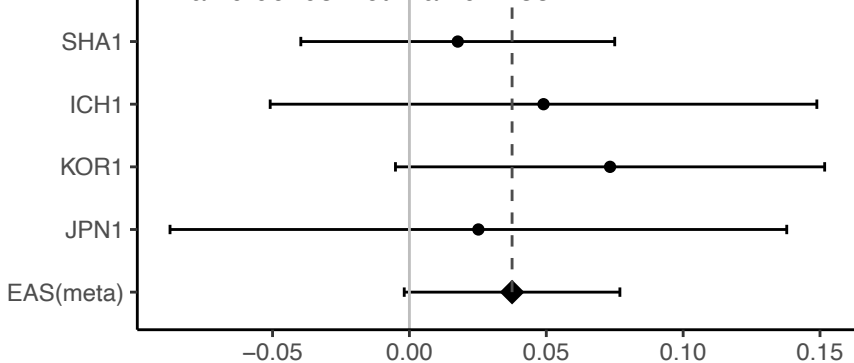

Pval: 4.93e-08 HetPval: 1.7e+01 logBF: 6

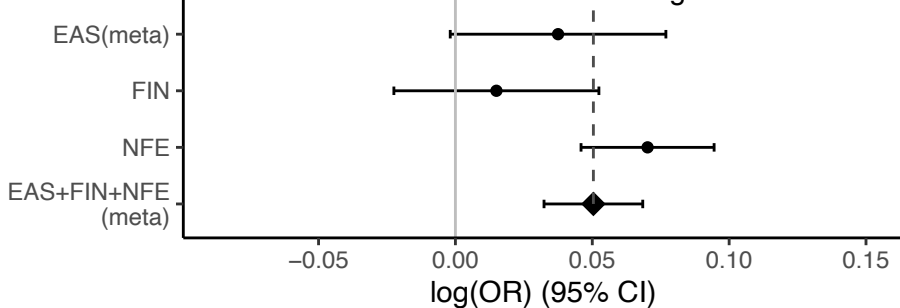

# IBD

chr5:132435113:C:T rs2188962 SLC22A5

Reference allele: C Effect allele: T

Reported: NFE

Source: EUR+EAS

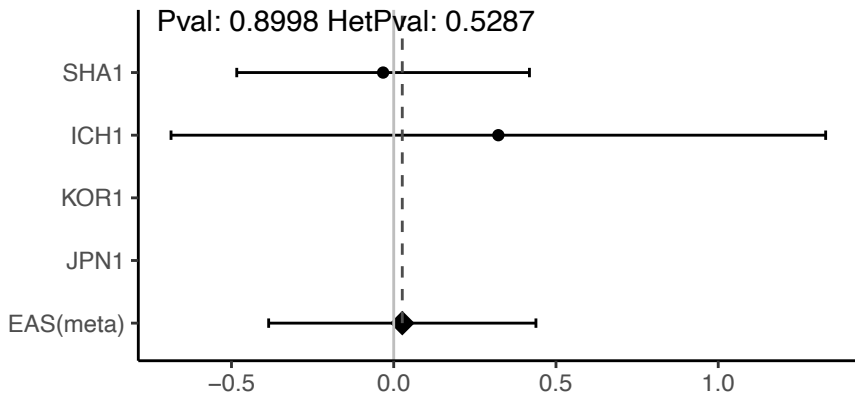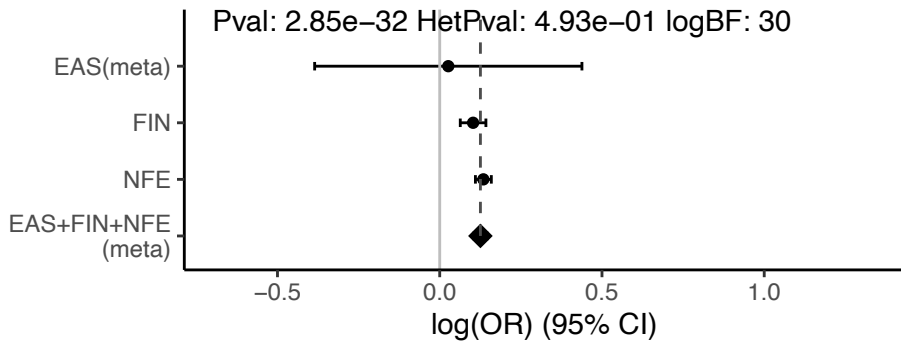

# IBD

chr5:142146492:C:A rs181826 NDFIP1

Reference allele: C Effect allele: A

Reported: NFE

Source: EUR+EAS

Pval: 0.001327 HetPval: 0.7441

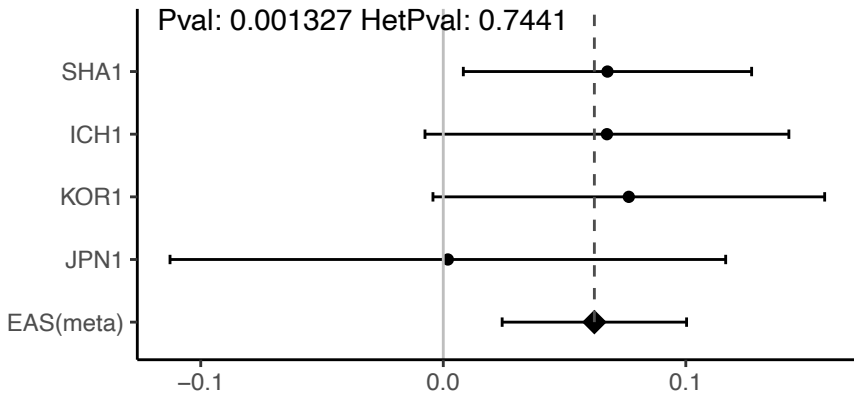

Pval: 4.65e-14 HetPval: 7.68e-01 |logBF: 12

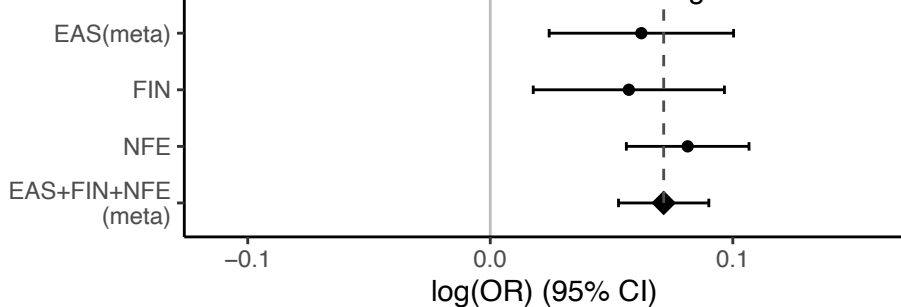

# IBD

chr5:142866576:C:T rs59672579 ARHGAP26

Reference allele: C Effect allele: T

Reported: NEW

Source: EUR+EAS

Pval:  $3.414 \times 10^{-5}$  HetPval: 0.09461

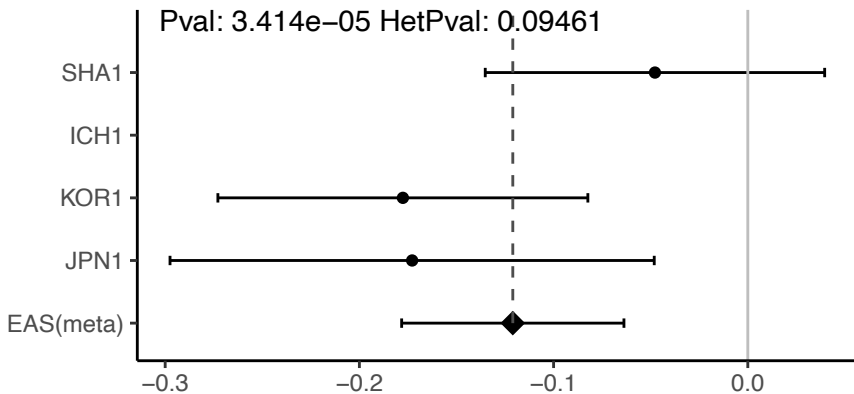

Pval:  $1.48 \times 10^{-10}$  HetPval:  $2.3 \times 10^{-1}$  logBF: 8.1

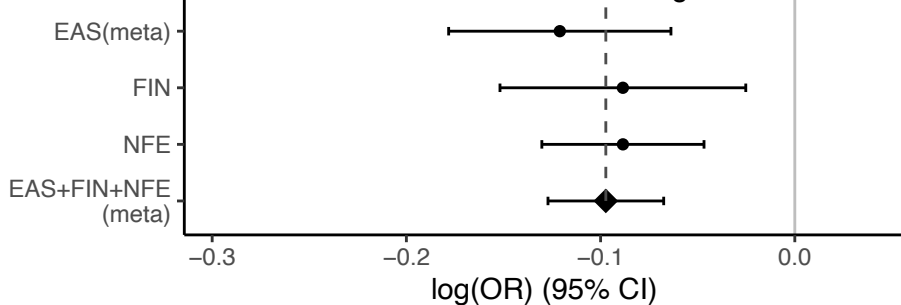

# IBD

chr5:150860514:C:T rs1000113 IRGM

Reference allele: C Effect allele: T

Reported: NFE

Source: EUR+EAS

Pval:  $6.366e-15$  HetPval: 0.8337

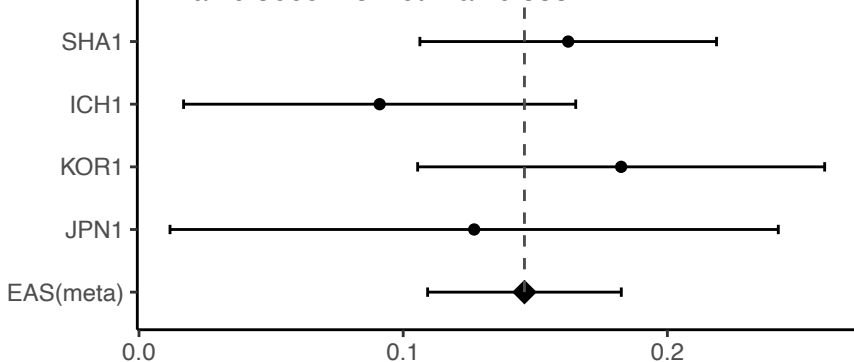

Pval:  $1.44e-32$  HetPval:  $4.37e-01$  logBF: 30

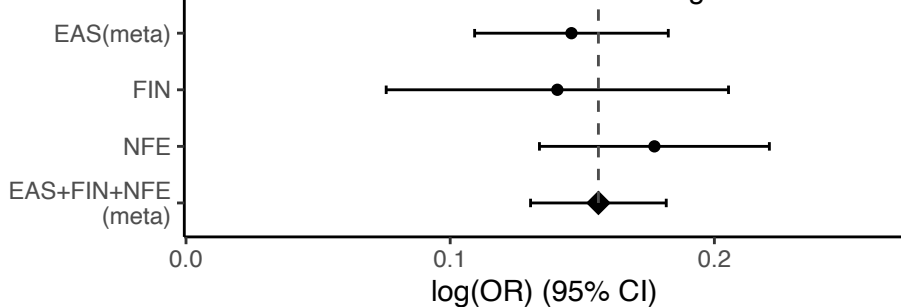



# IBD

chr5:156956411:A:G rs1363232 TIMD4

Reference allele: A Effect allele: G

Reported: NEW

Source: EUR+EAS

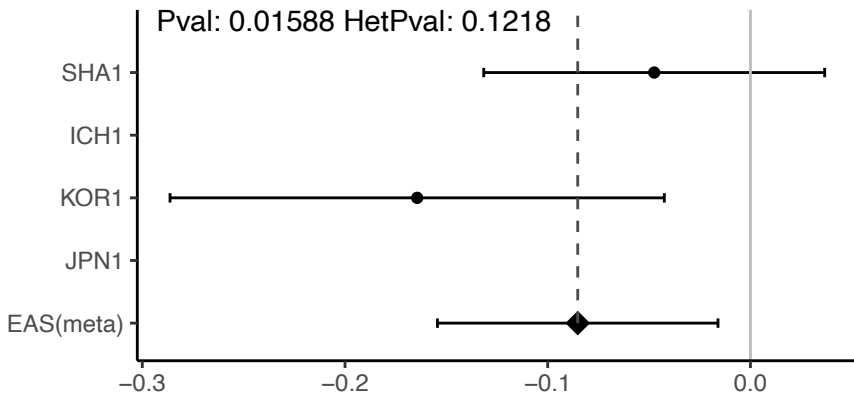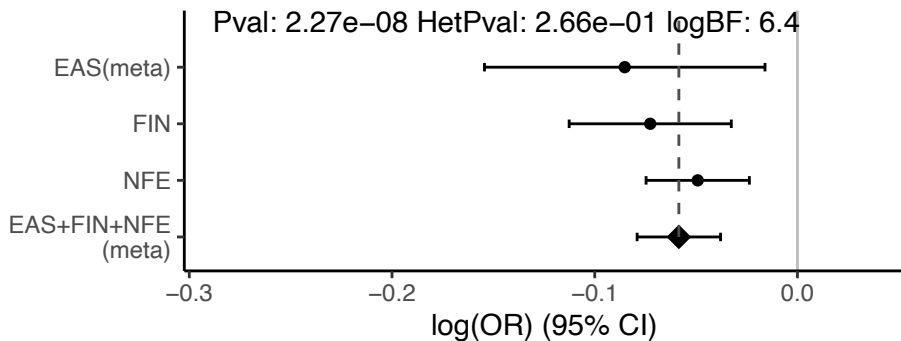

# IBD

chr5:159402286:C:T rs755374 IL12B

Reference allele: C Effect allele: T

Reported: NFE,EAS

Source: EUR+EAS

Pval:  $2.028 \times 10^{-29}$  HetPval: 0.3016

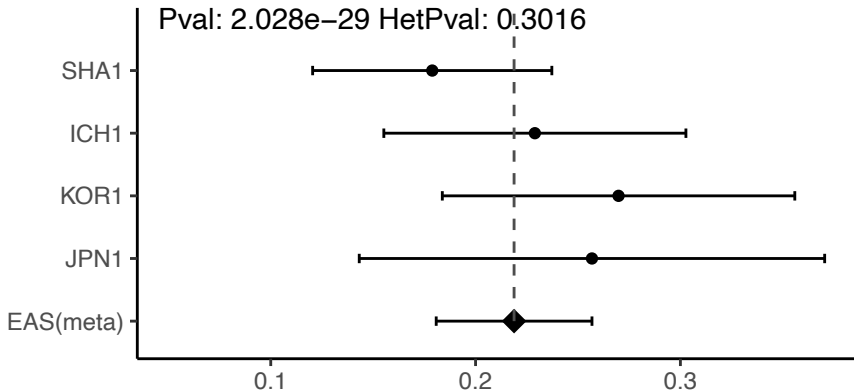

Pval:  $5.21 \times 10^{-67}$  HetPval:  $1.42 \times 10^{-4}$  logBF: 65

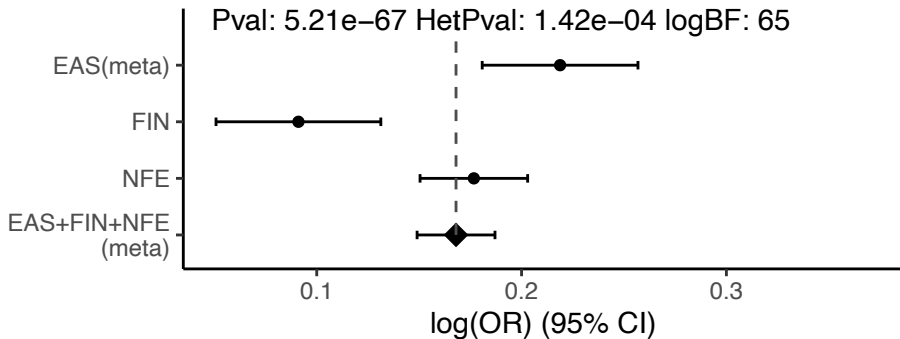

# IBD

chr5:172151212:C:T rs2101594 STK10

Reference allele: C Effect allele: T

Reported: NEW

Source: EUR+EAS

Pval: 0.0726 HetPval: 0.9198

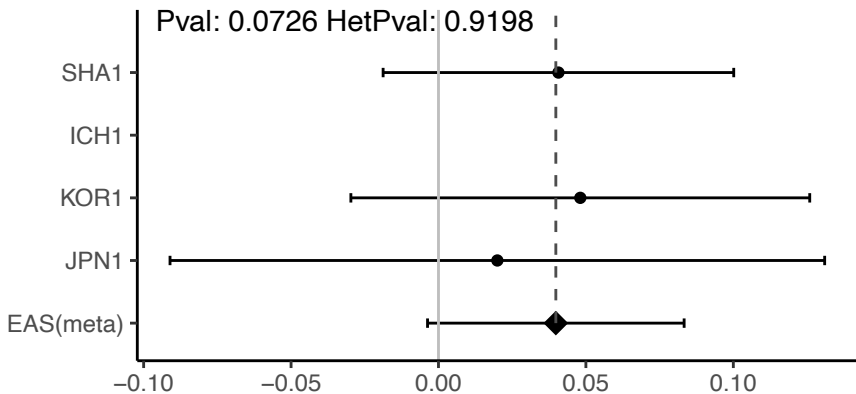

Pval: 4.87e-08 HetPval: 9.64e-01 logBF: 6

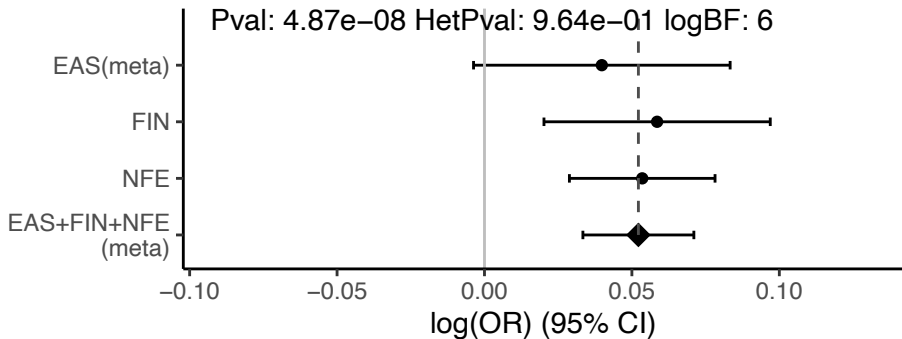

# IBD

chr5:172897975:G:A rs564349 ERGIC1

Reference allele: G Effect allele: A

Reported: NFE

Source: EUR+EAS

Pval:  $5.74e-07$  HetPval: 0.5467

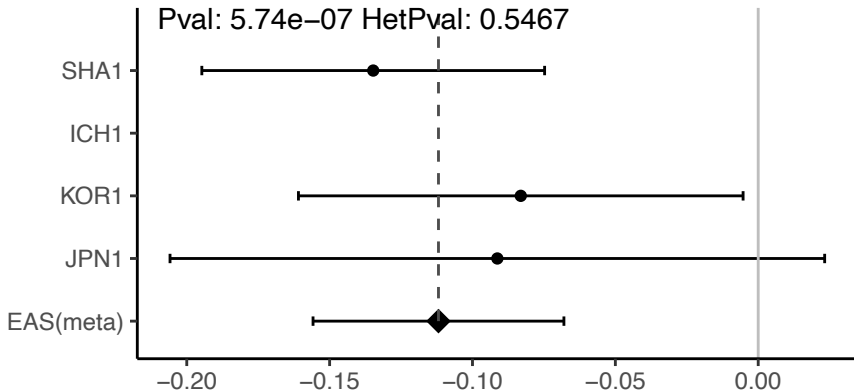

Pval:  $2.98e-13$  HetPval:  $2.98e-01$  logBF: 11

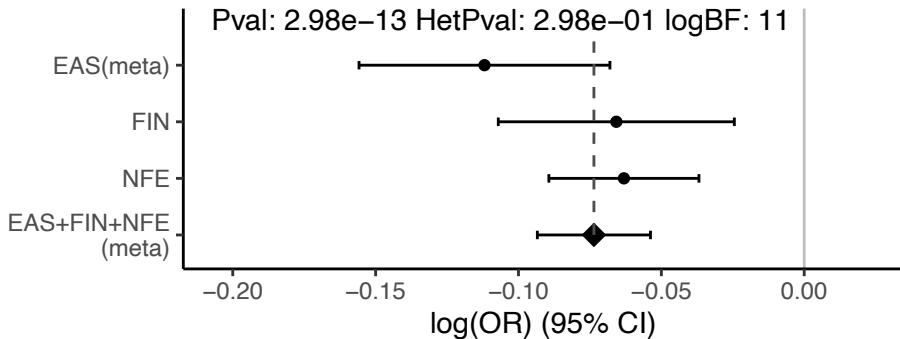

# IBD

chr5:177372991:T:C rs10051765 RGS14

Reference allele: T Effect allele: C

Reported: NFE

Source: EUR+EAS

Pval: 0.001358 HetPval: 0.5744

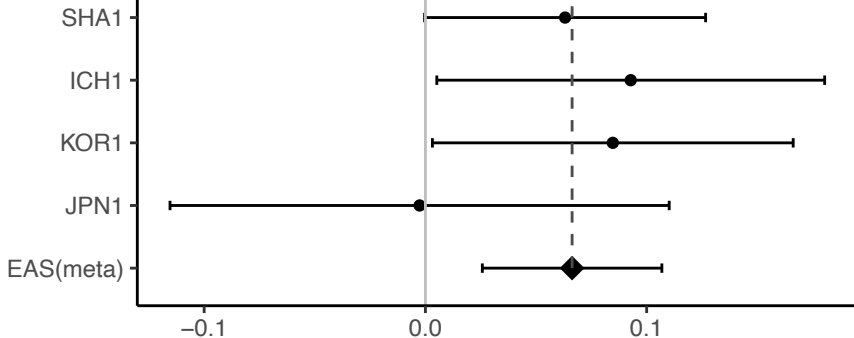

Pval: 1.24e-14 HetPval: 6.86e-01 logBF: 13

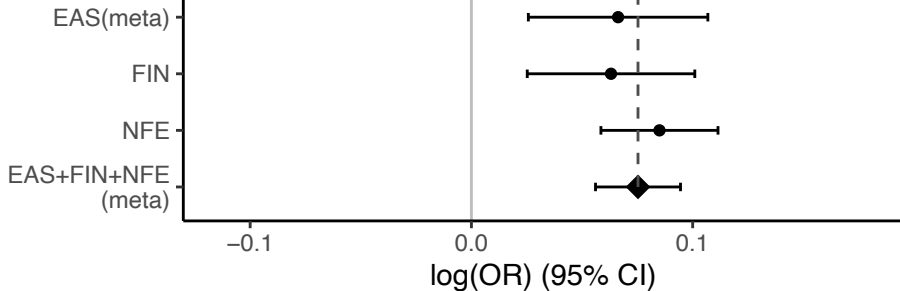

# IBD

chr6:246629:G:A rs77688705 DUSP22

Reference allele: G Effect allele: A

Reported: NFE

Source: EUR+EAS

Pval:  $1.148 \times 10^{-11}$  HetPval: 0.9583

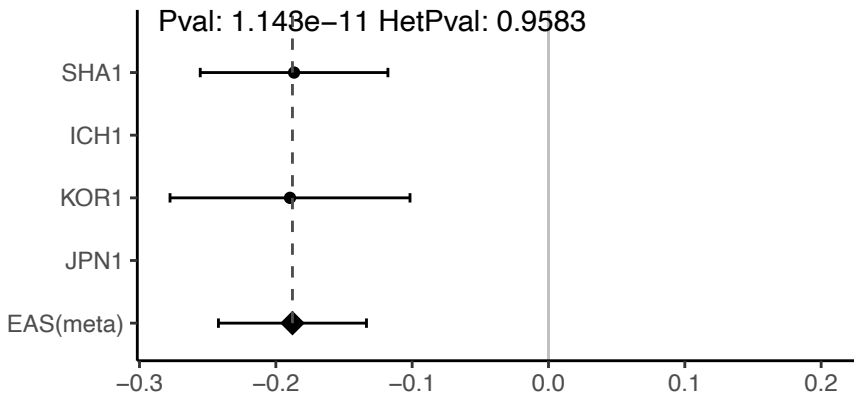

Pval:  $4.71 \times 10^{-9}$  HetPval:  $6.07 \times 10^{-3}$  logBF: 8

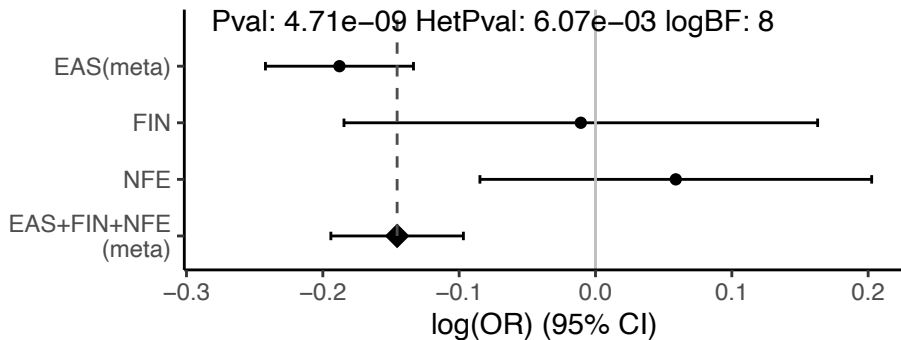

# IBD

chr6:14719265:G:A rs17119 RNU6-793P

Reference allele: G Effect allele: A

Reported: NFE

Source: EUR+EAS

Pval: 0.000483 HetPval: 0.6875

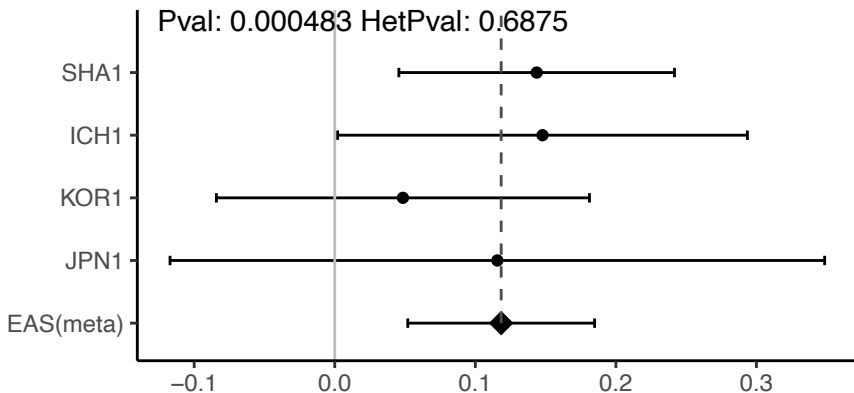

Pval: 5.01e-13 HetPval: 3.65e-01 logBF: 11

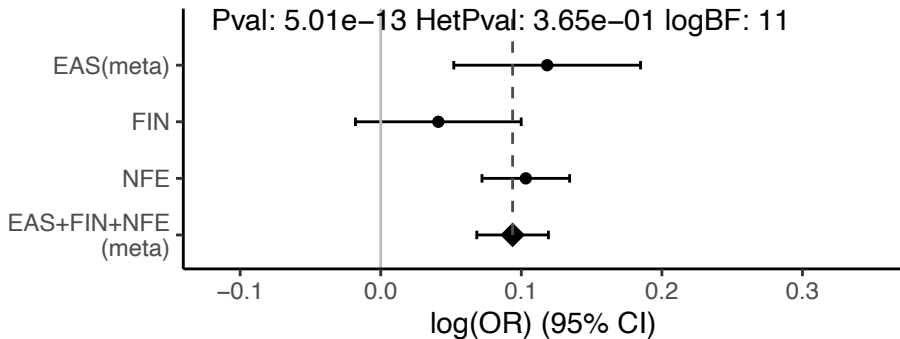

# IBD

chr6:20657114:T:C rs2328546 CDKAL1

Reference allele: T Effect allele: C

Reported: NFE

Source: EUR+EAS

Pval: 1.543e-06 HetPval: 0.2533

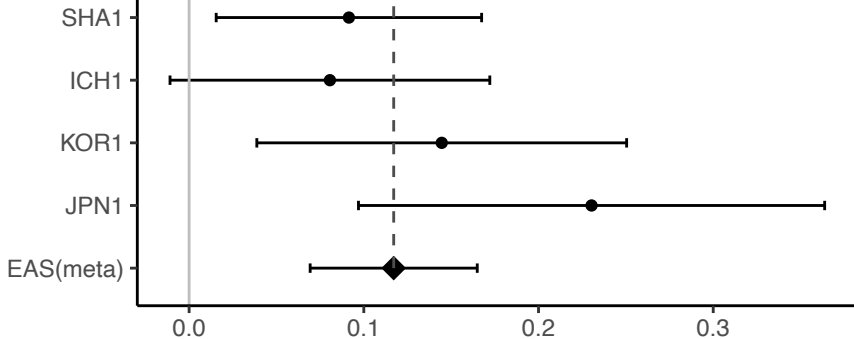

Pval: 4.86e-19 HetPval: 4.51e-01 logBF: 17

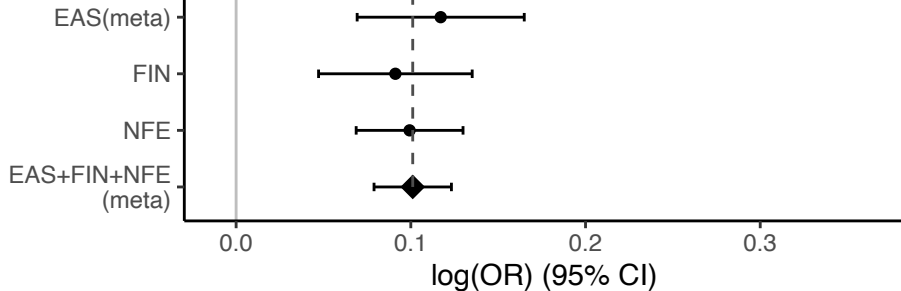



# IBD

chr6:21385471:T:C rs4710973 AL031767.2

Reference allele: T Effect allele: C

Reported: NFE

Source: EUR+EAS

Pval: 0.0001848 HetPval: 0.166

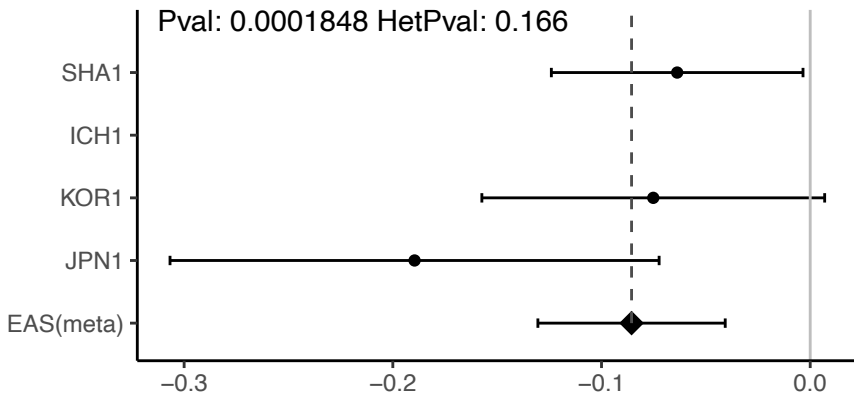

Pval: 7.85e-16 HetPval: 3.69e-01 logBF: 14

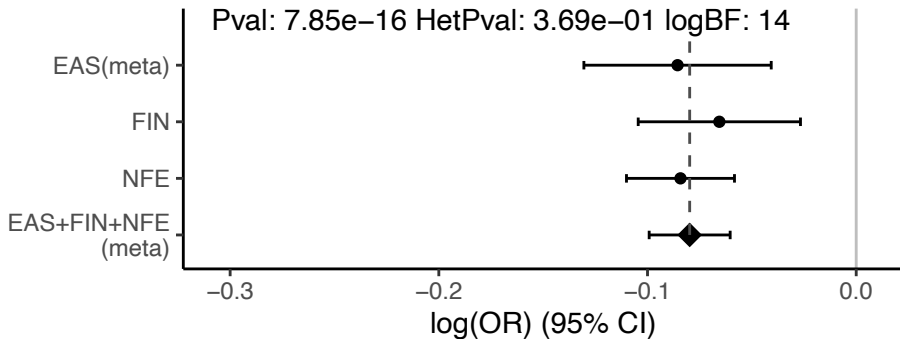

# IBD

chr6:106020611:C:T rs9480634 ATG5

Reference allele: C Effect allele: T

Reported: NFE

Source: EUR+EAS

Pval: 0.004109 HetPval: 0.1421

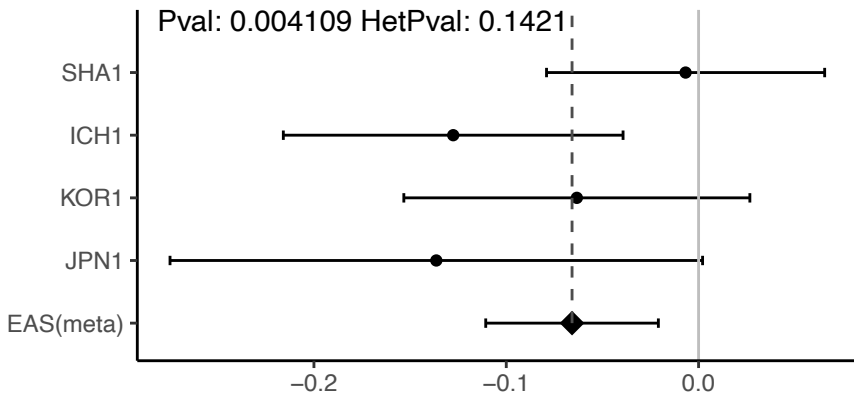

Pval: 4.25e-17 HetPval: 3.06e-01 logBF: 15

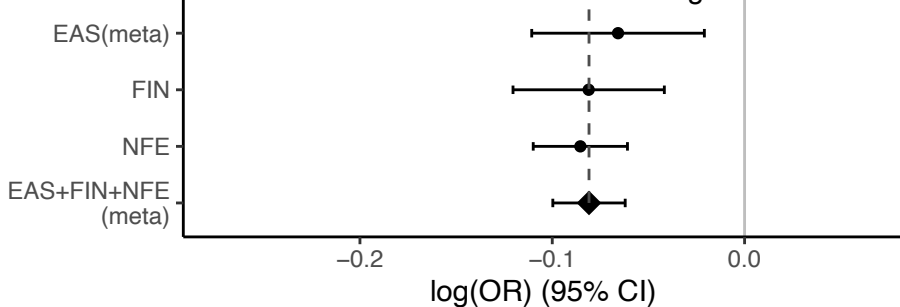

# IBD

chr6:117522909:A:G rs210648 DCBLD1

Reference allele: A Effect allele: G

Reported: NEW

Source: EUR+EAS

Pval: 0.1008 HetPval: 0.6038

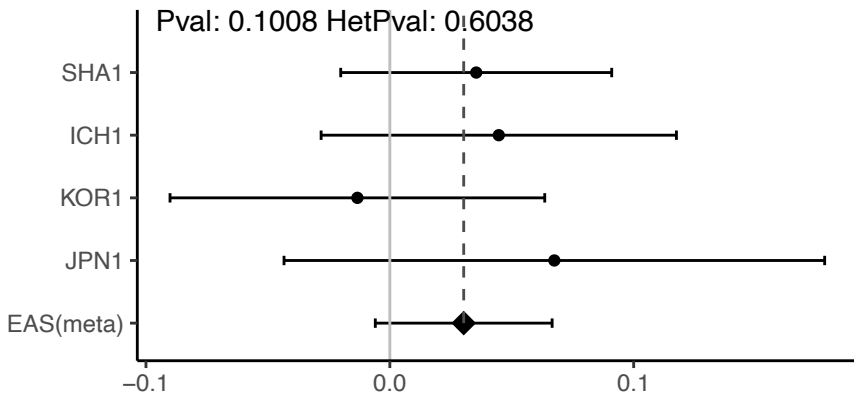

Pval: 2.82e-09 HetPval: 2.64e-01 logBF: 7.2

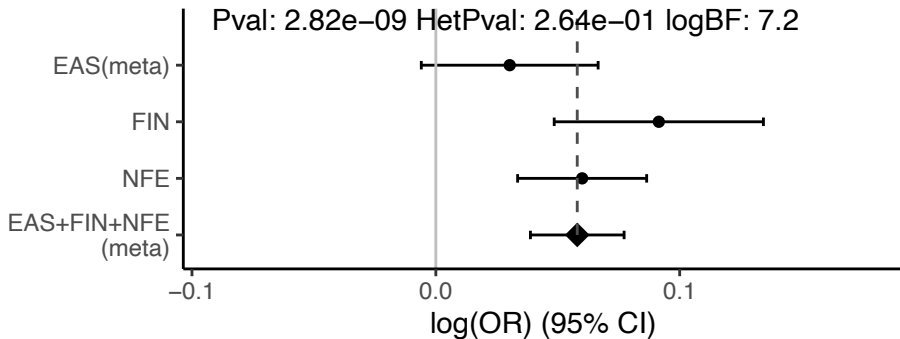

# IBD

chr6:143570283:A:G rs12191421 PHACTR2

Reference allele: A Effect allele: G

Reported: NFE

Source: EUR+EAS

Pval: 0.0002321 HetPval: 0.03664

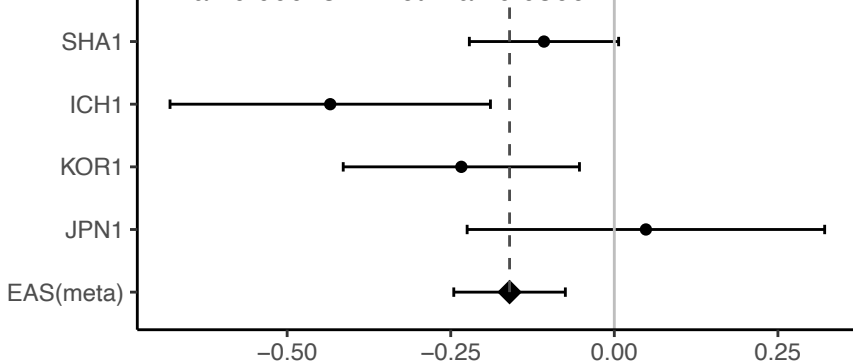

Pval: 2.86e-09 HetPval: 7.86e-02 logBF: 7.2

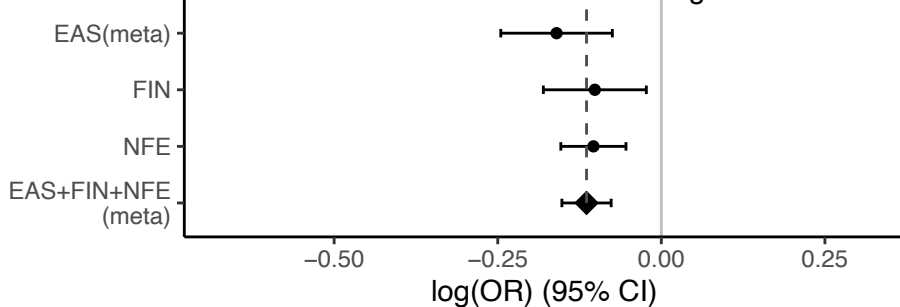

# IBD

chr6:166965500:C:T rs6939196 RNASET2

Reference allele: C Effect allele: T

Reported: NFE,EAS

Source: EUR+EAS

Pval:  $4.036e-11$  HetPval: 0.4807

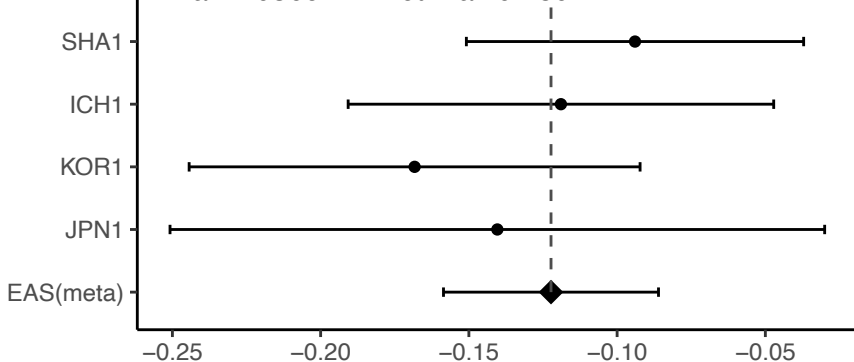

Pval:  $3.4e-24$  HetPval:  $4.22e-01$  logBF: 22

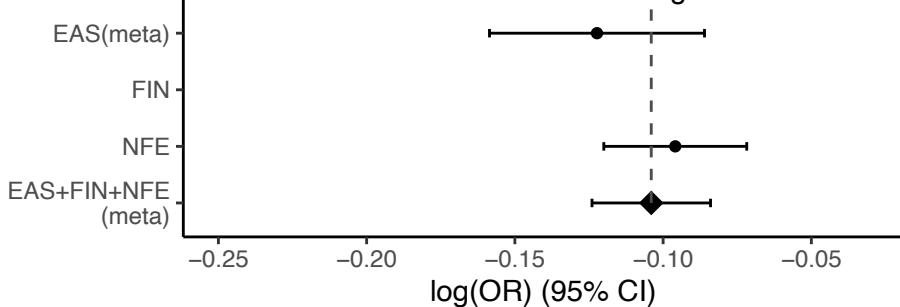

# IBD

chr7:5397122:C:T rs748670681 TNRC18

Reference allele: C Effect allele: T

Reported: NFE

Source: EUR+EAS

Pval: - HetPval: -

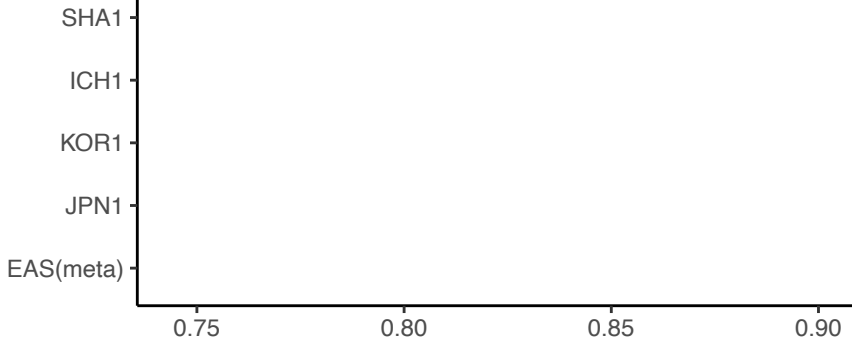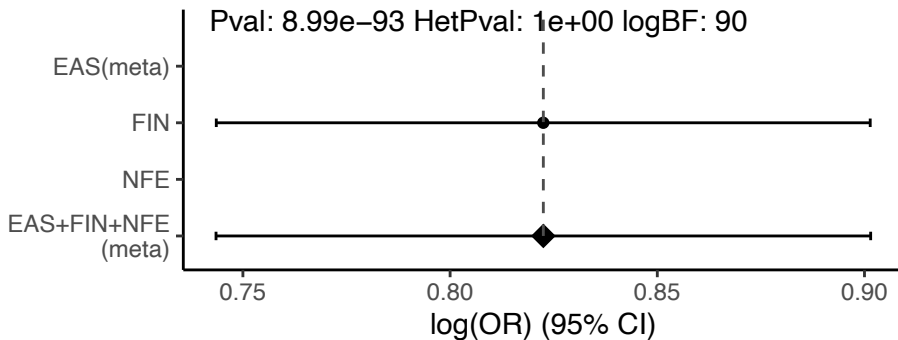

# IBD

chr7:20542073:T:C rs76380568 ABCB5

Reference allele: T Effect allele: C

Reported: NFE

Source: EUR+EAS

Pval: - HetPval: -

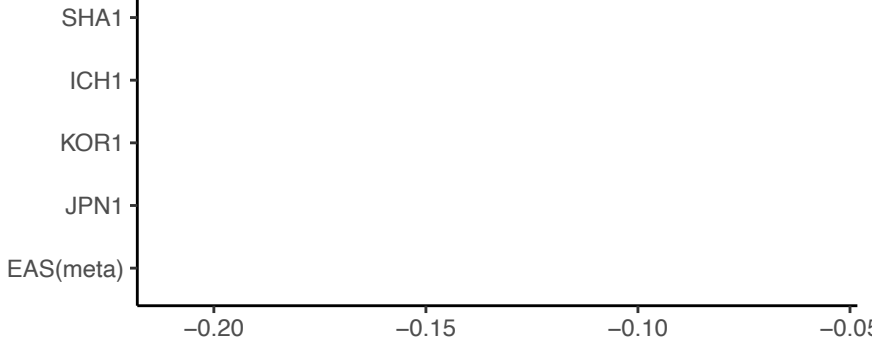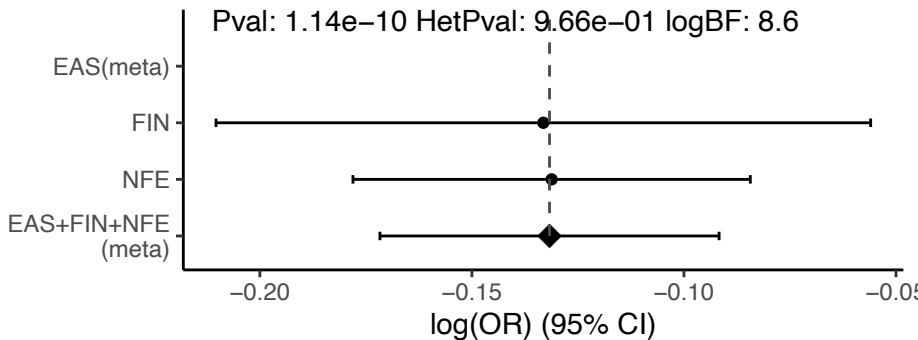

# IBD

chr7:50283578:T:C rs4917129 IKZF1

Reference allele: T Effect allele: C

Reported: NFE

Source: EUR+EAS

Pval:  $2.635e-08$  HetPval: 0.6507

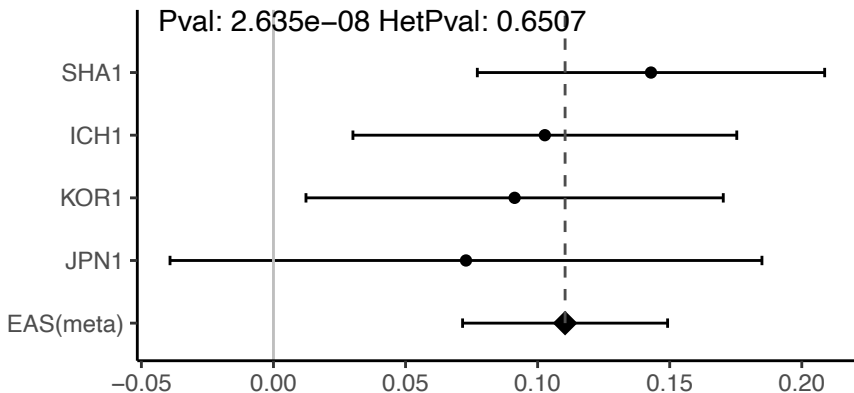

Pval:  $6.35e-19$  HetPval:  $3.51e-01$  logBF: 17

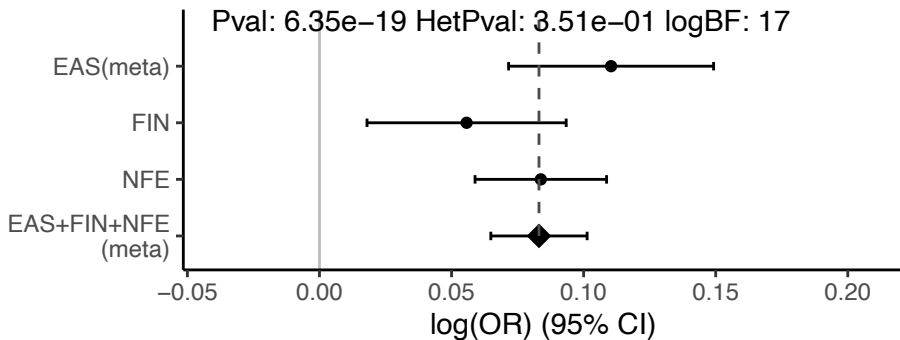



# IBD

chr7:74711703:C:T rs117026326 GTF2I

Reference allele: C Effect allele: T

Reported: NEW

Source: EUR+EAS

Pval: 2.282e-10 HetPval: 0.3243

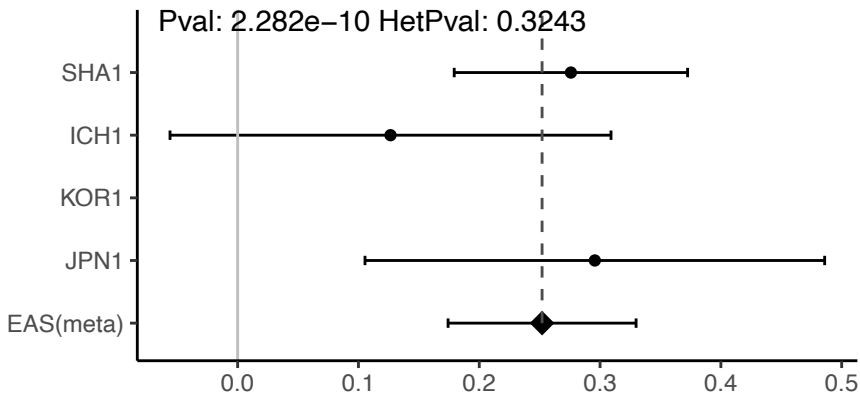

Pval: 1.82e-11 HetPval: 9.96e-02 logBF: 9.6

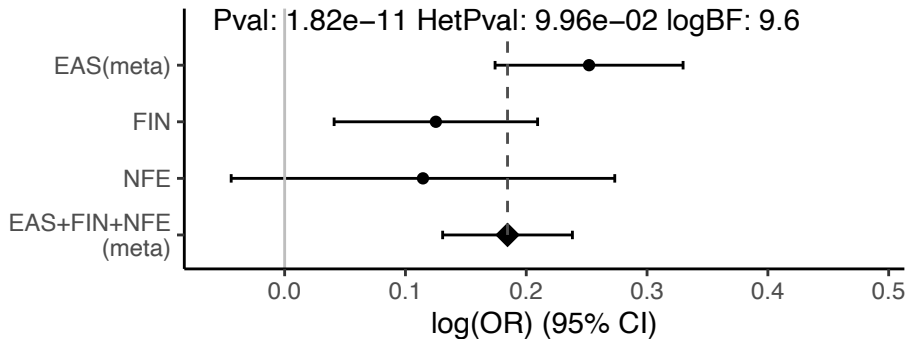

# IBD

chr7:99150512:T:G rs144341967 SMURF1

Reference allele: T Effect allele: G

Reported: NFE

Source: EUR+EAS

Pval: - HetPval: -

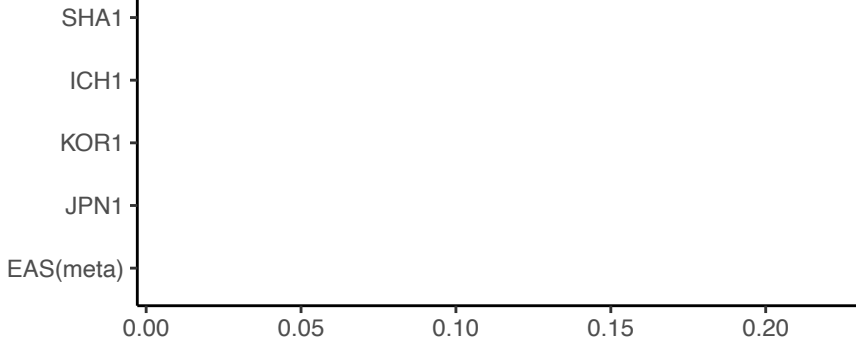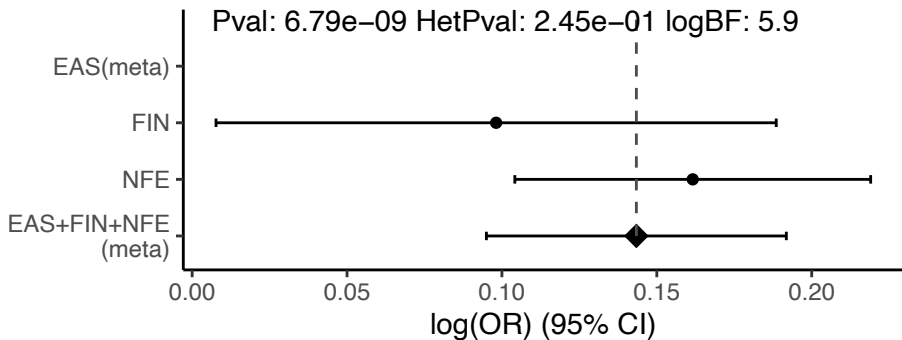

# IBD

chr7:148742273:G:C rs243500 CUL1

Reference allele: G Effect allele: C

Reported: NFE

Source: EUR+EAS

Pval: 0.01912 HetPval: 0.7603

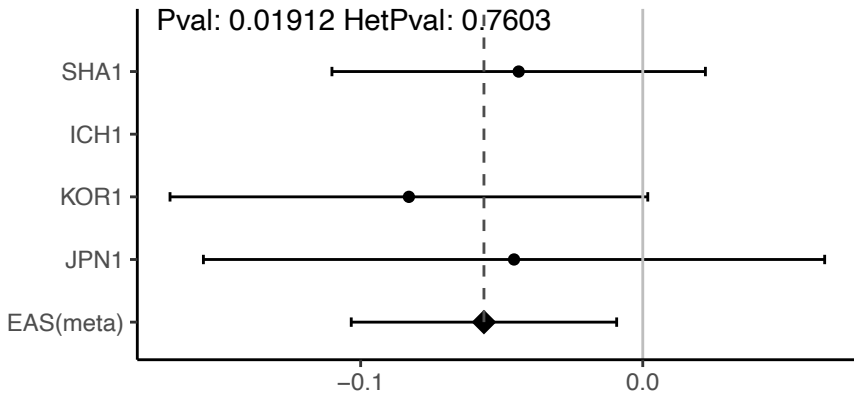

Pval: 2.8e-11 HetPval: 4.95e-01 logBF: 9.2

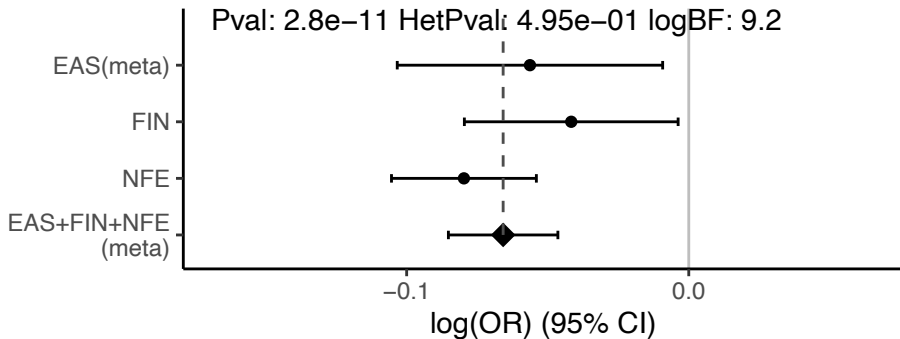

# IBD

chr8:125516832:G:A rs4380956 TRIB1

Reference allele: G Effect allele: A

Reported: NFE

Source: EUR+EAS

Pval: 0.037 HetPval: 0.1046

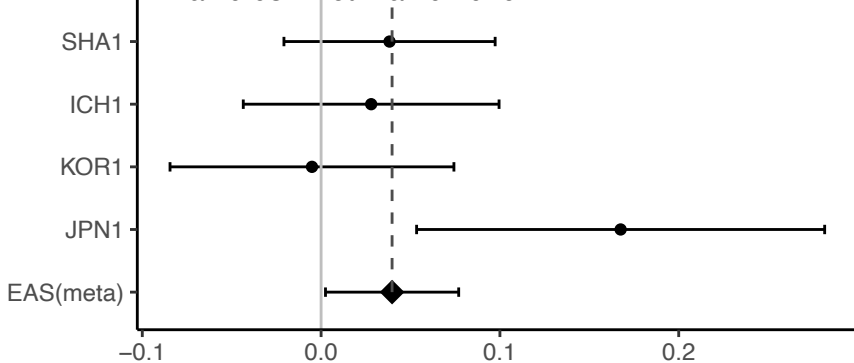

Pval: 3.23e-15 HetPval: 4.92e-02 logBF: 13

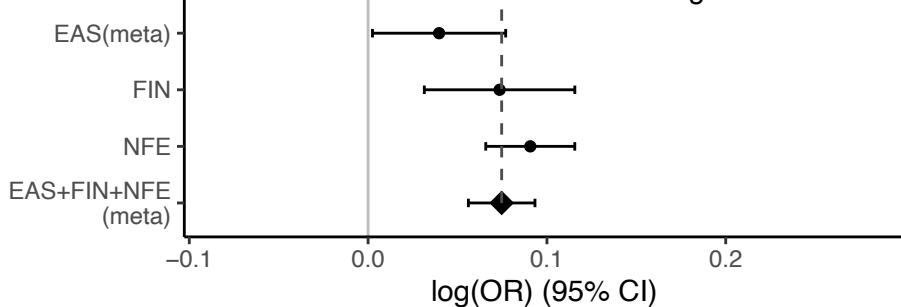

# IBD

chr8:129611859:G:C rs1991866 CCDC26

Reference allele: G Effect allele: C

Reported: NFE

Source: EUR+EAS

Pval: 0.00563 HetPval: 0.6908

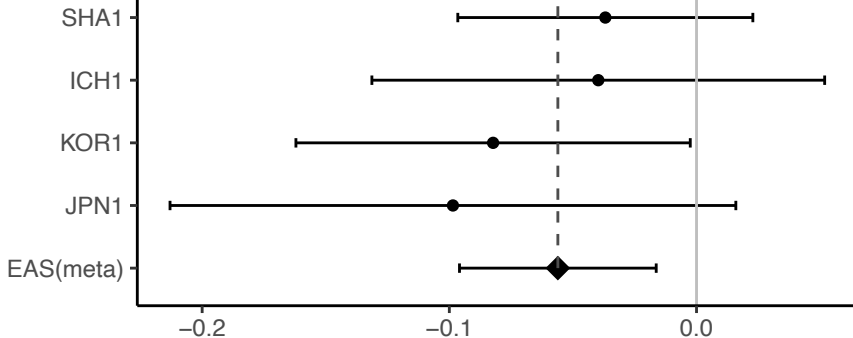

Pval: 2.23e-08 HetPval: 6.25e+01 logBF: 6.3

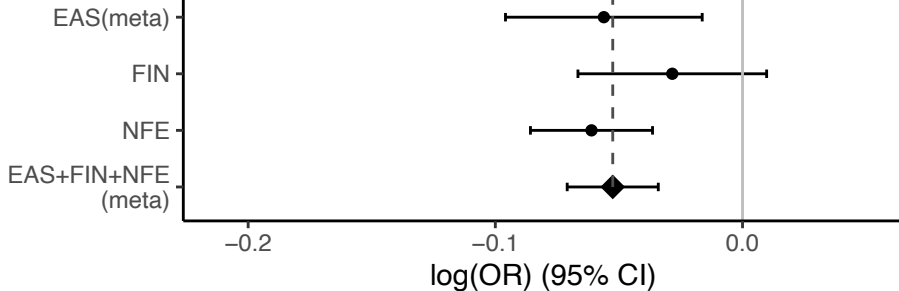

# IBD

chr8:141164479:C:T rs438041 DENND3

Reference allele: C Effect allele: T

Reported: NEW

Source: EAS

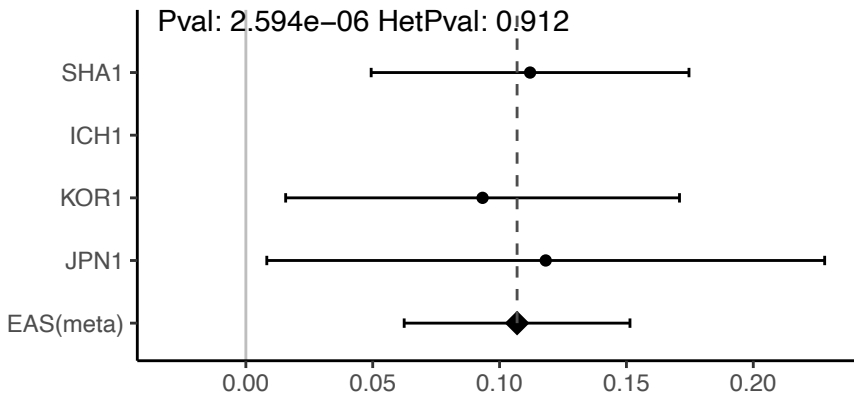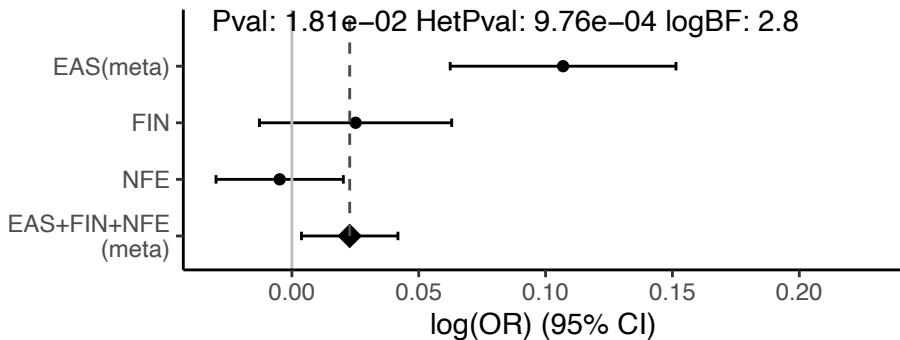

# IBD

chr9:4981866:G:T rs36051895 JAK2

Reference allele: G Effect allele: T

Reported: NFE,EAS

Source: EUR+EAS

Pval: 1.897e-09 HetPval: 0.4703

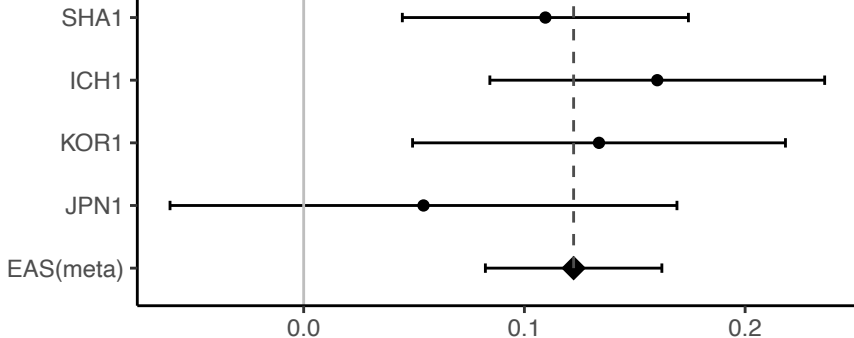

Pval: 1.7e-43 HetPval: 3.09e-01 logBF: 41

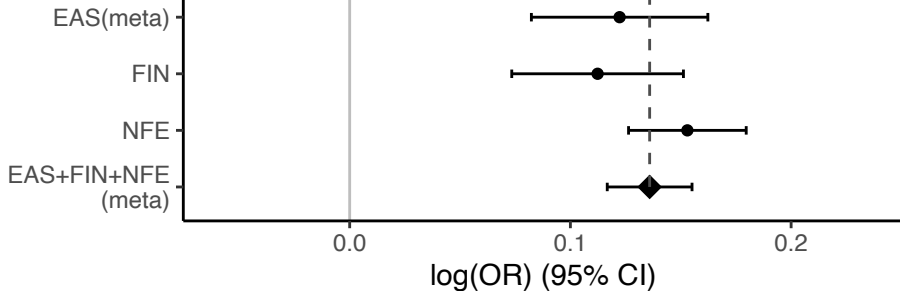

# IBD

chr9:88081422:G:A rs11142085 SPATA31C2

Reference allele: G Effect allele: A

Reported: NEW

Source: EUR+EAS

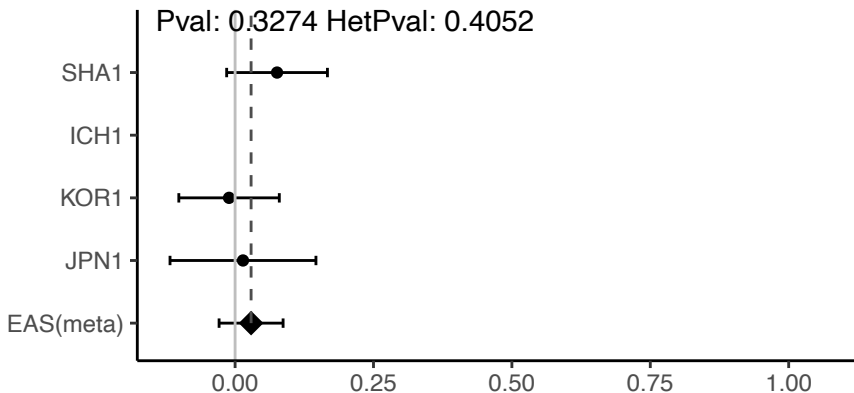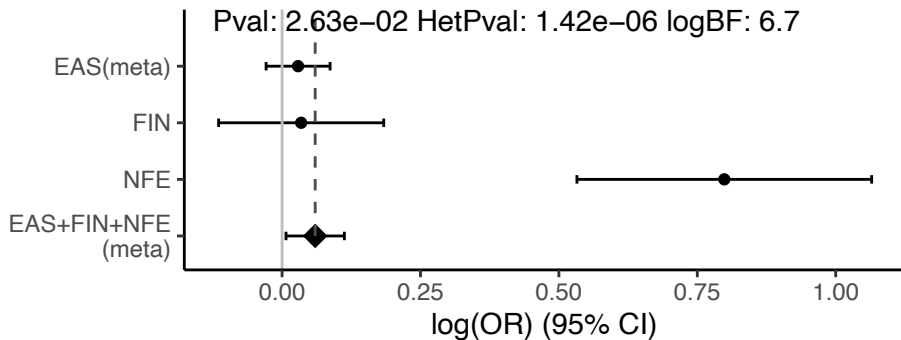



# IBD

chr9:92674850:A:G rs10992396 IPPK

Reference allele: A Effect allele: G

Reported: NEW

Source: EUR+EAS

Pval: 0.0004751 HetPval: 0.03111

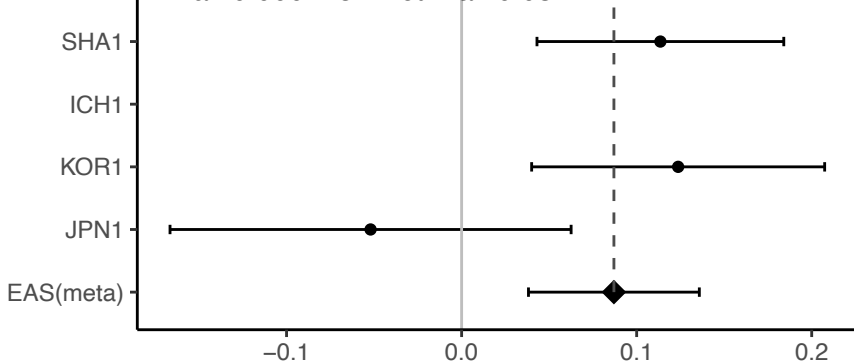

Pval: 1.38e-12 HetPval: 5.25e-02 logBF: 10

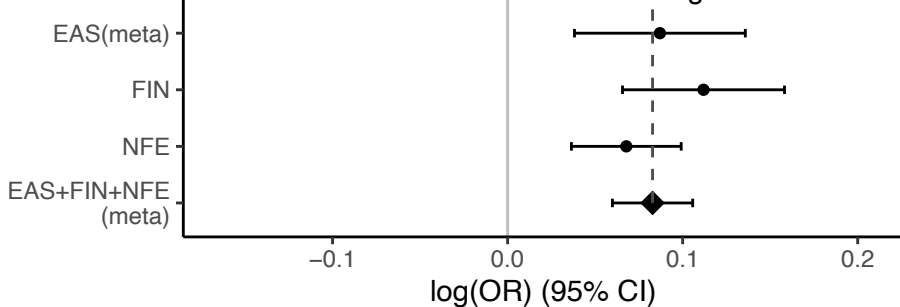

# IBD

chr9:114823617:G:C rs56211063 TNFSF15

Reference allele: G Effect allele: C

Reported: NFE,EAS

Source: EUR+EAS

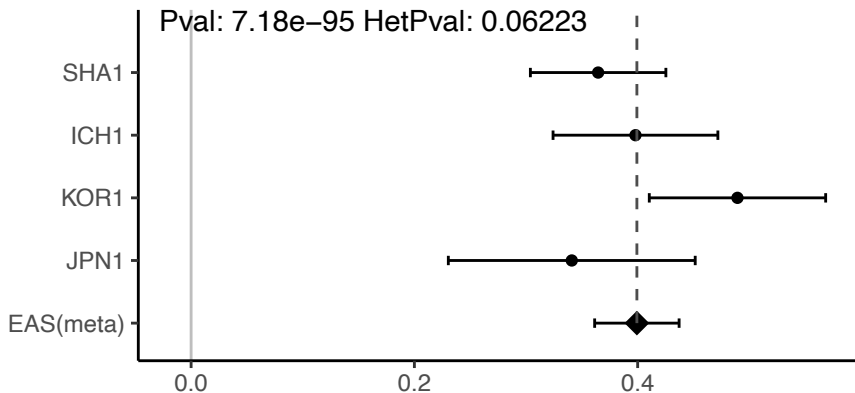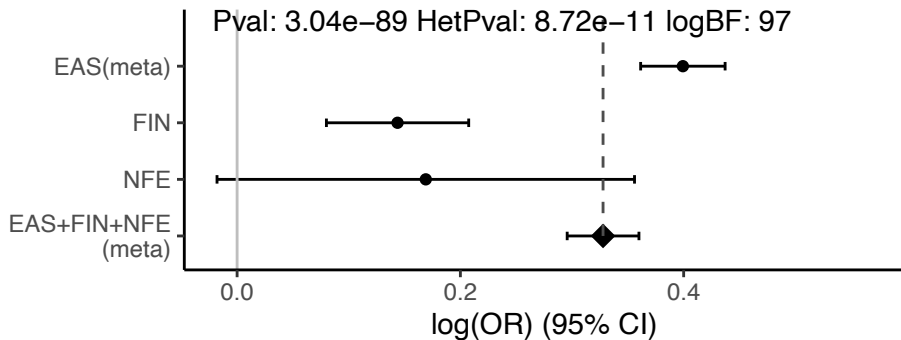

# IBD

chr9:136378050:T:C rs3812565 SNAPC4

Reference allele: T Effect allele: C

Reported: NFE

Source: EUR+EAS

Pval: 0.04878 HetPval: 0.01493

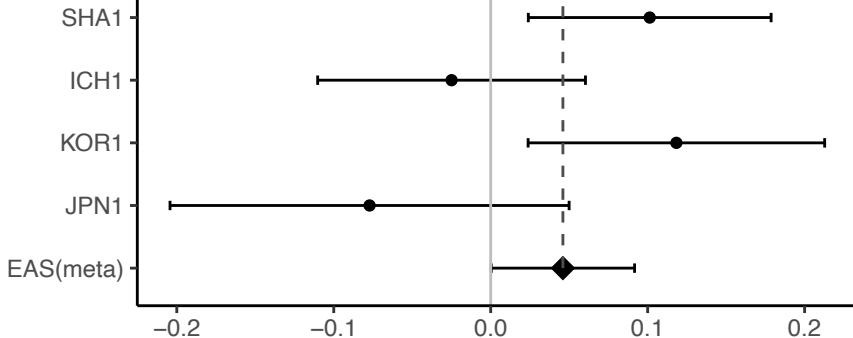

Pval: 3.22e-37 HetPval: 1.08e-05 logBF: 39

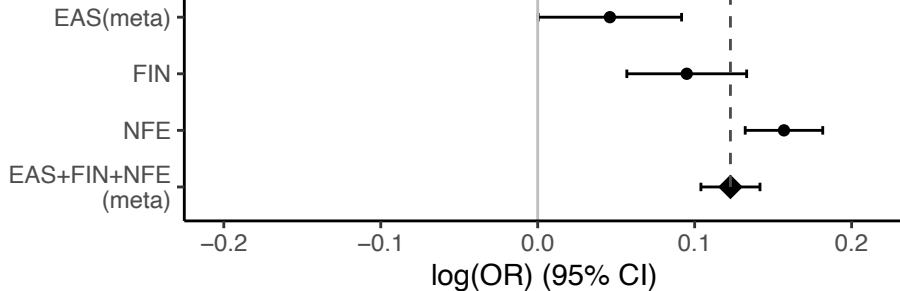

# IBD

chr10:6060049:C:T rs12722489 IL2RA

Reference allele: C Effect allele: T

Reported: NFE

Source: EUR+EAS

Pval: 0.001162 HetPval: 0.9473

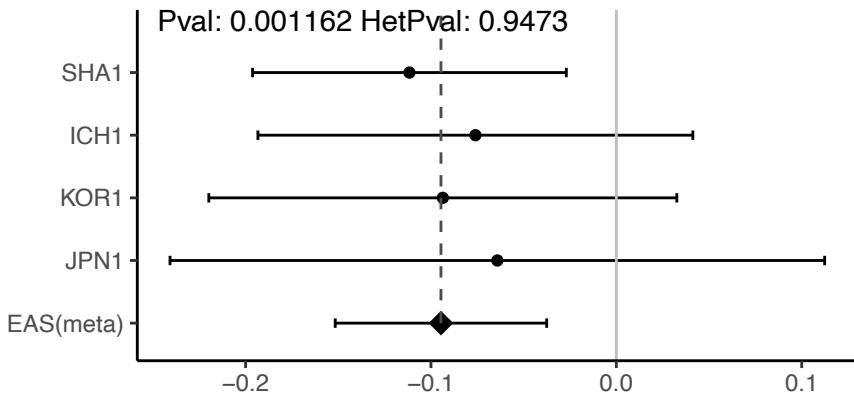

Pval: 2.43e-11 HetPval: 9.77e-01 logBF: 9.2

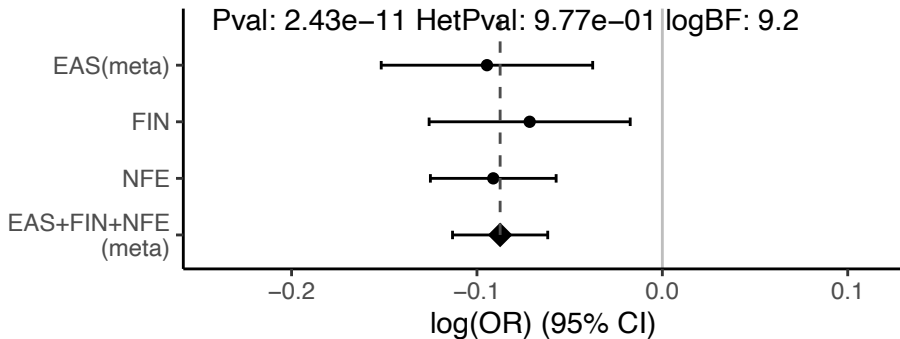

# IBD

chr10:6607973:C:T rs4748198 PRKCQ

Reference allele: C Effect allele: T

Reported: NEW

Source: EUR+EAS

Pval:  $6.045e-06$  HetPval: 0.8411

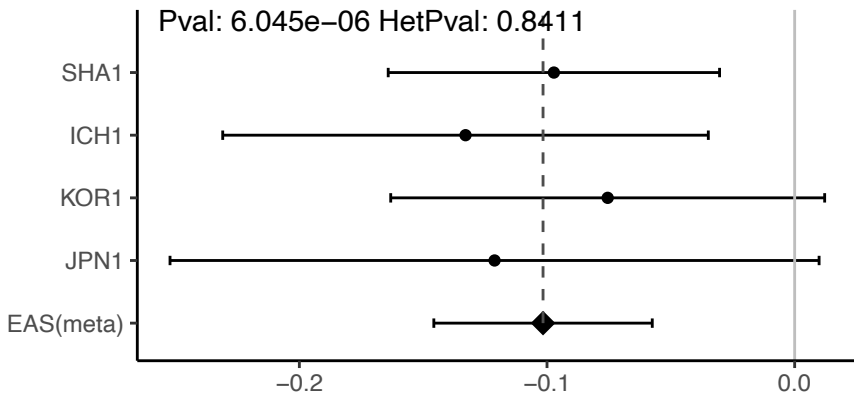

Pval:  $6.84e-12$  HetPval:  $8.12e-01$  logBF: 9.8

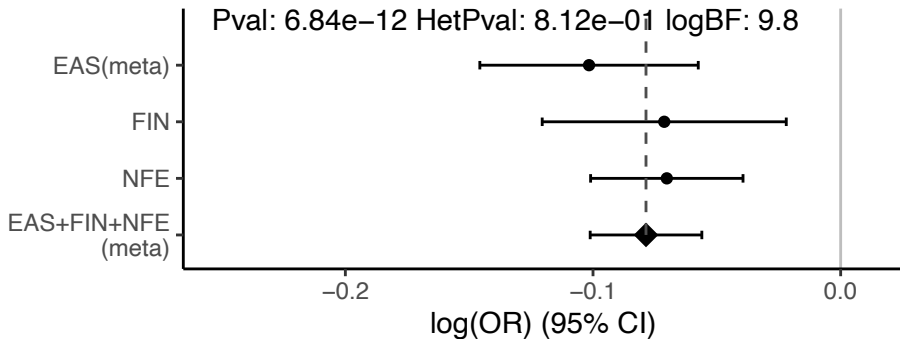

# IBD

chr10:30410871:T:C rs7898978 MAP3K8

Reference allele: T Effect allele: C

Reported: NFE

Source: EUR+EAS

Pval:  $6.992e-05$  HetPval: 0.9632

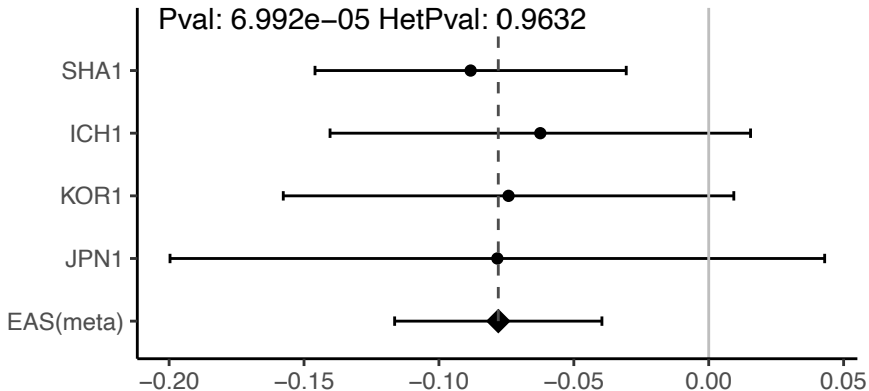

Pval:  $1.48e-15$  HetPval:  $3.41e-01$  logBF: 13

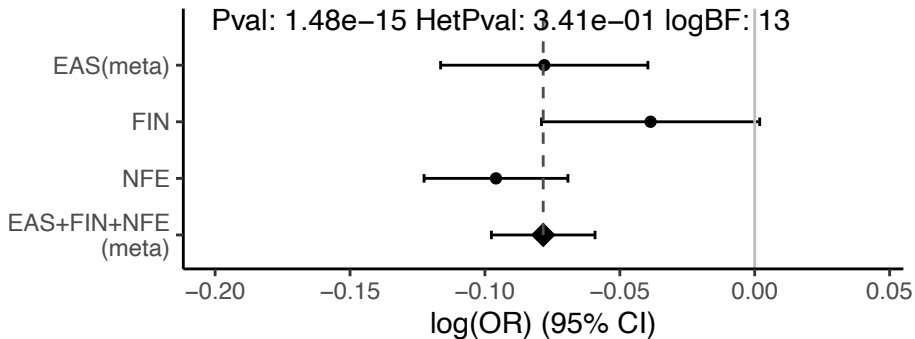

# IBD

chr10:35241532:G:A rs12764283 CREM

Reference allele: G Effect allele: A

Reported: NFE

Source: EUR+EAS

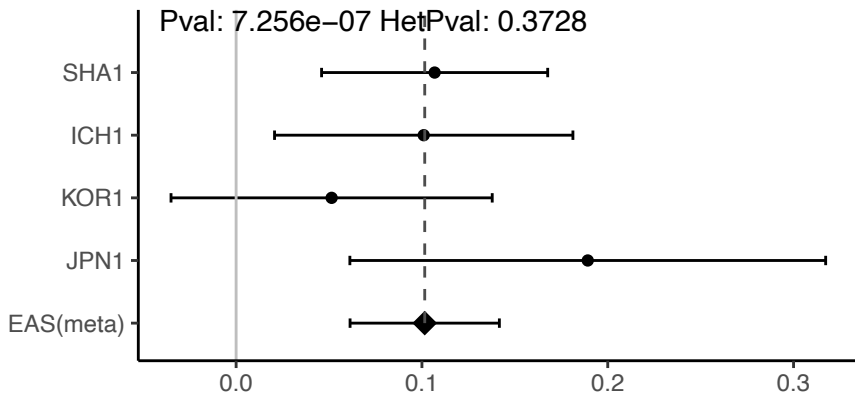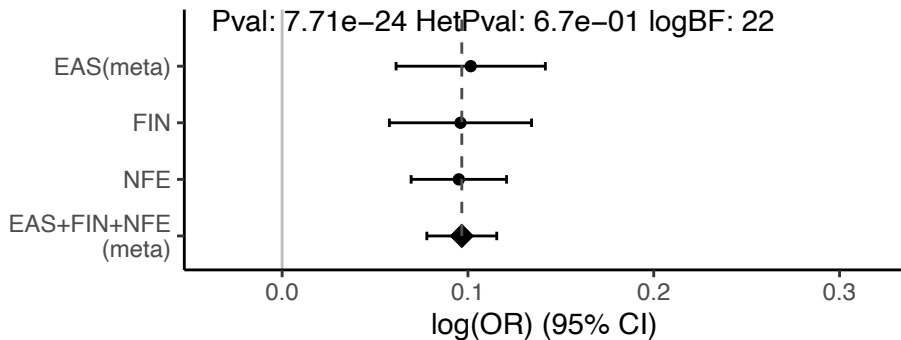

# IBD

chr10:58243611:T:C rs2790211 IPMK

Reference allele: T Effect allele: C

Reported: NFE

Source: EUR+EAS

Pval:  $3.988e-05$  HetPval: 0.9421

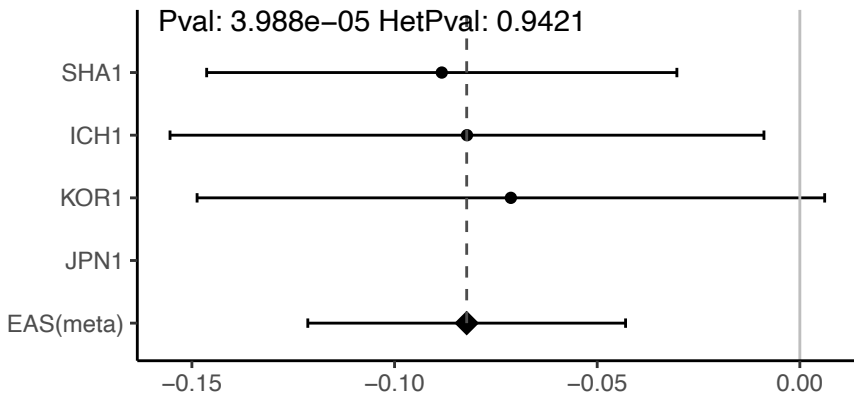

Pval:  $4.7e-14$  HetPval:  $9.98e-01$  logBF: 12

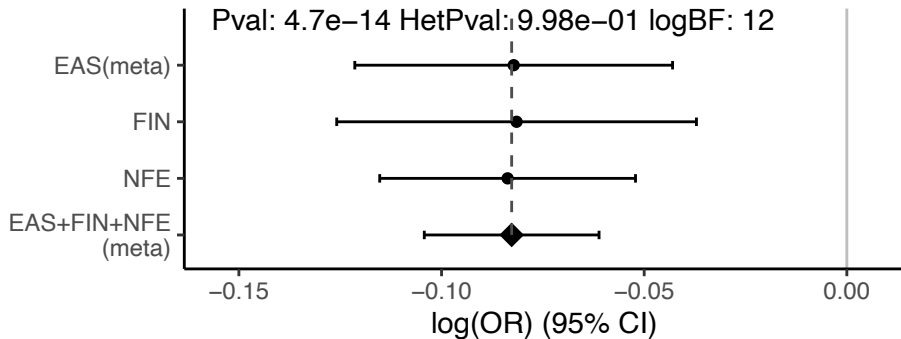



# IBD

chr10:62685804:A:G rs10761659 ALDH7A1P4

Reference allele: A Effect allele: G

Reported: NFE,EAS

Source: EUR+EAS

Pval: 1.541e-08 HetPval: 0.2912

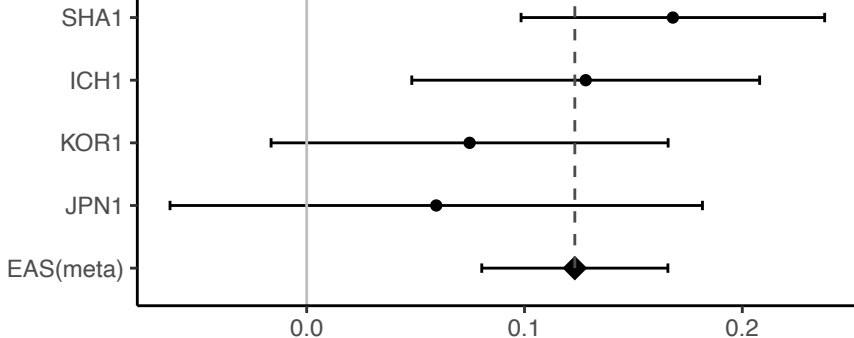

Pval: 3.9e-51 HetPval: 1.83e-01 logBF: 49

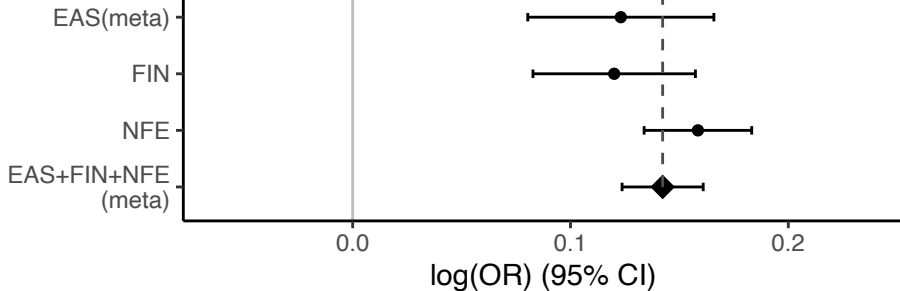

# IBD

chr10:79286696:G:A rs1250566 ZMIZ1

Reference allele: G Effect allele: A

Reported: NFE

Source: EUR+EAS

Pval:  $5.368e-17$  HetPval: 0.7492

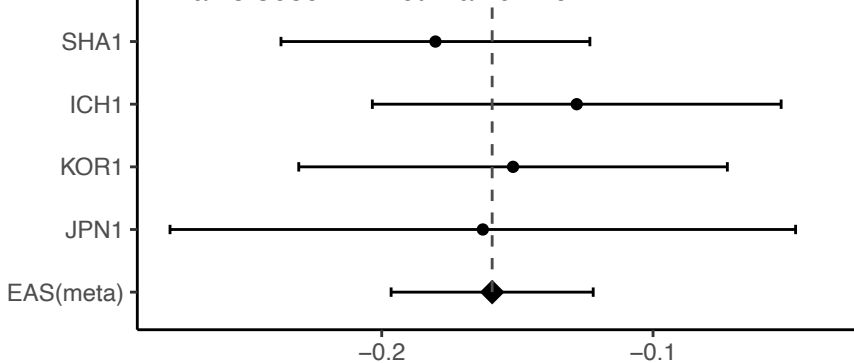

Pval:  $1.27e-28$  HetPval:  $3.3e-02$  logBF: 27

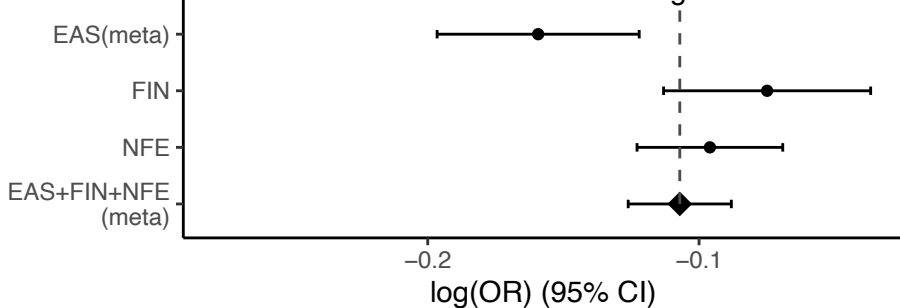

# IBD

chr10:92669710:C:T rs7918084 KIF11

Reference allele: C Effect allele: T

Reported: NFE

Source: EUR+EAS

Pval: 0.0614 HetPval: 0.719

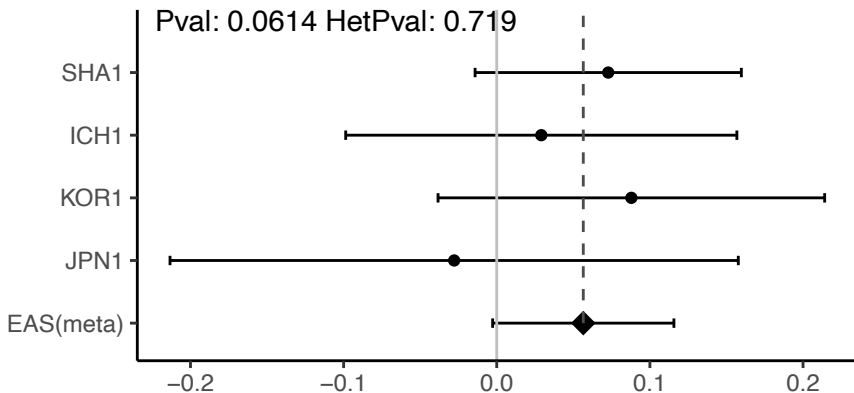

Pval: 2.02e-12 HetPval: 9.07e-01 logBF: 10

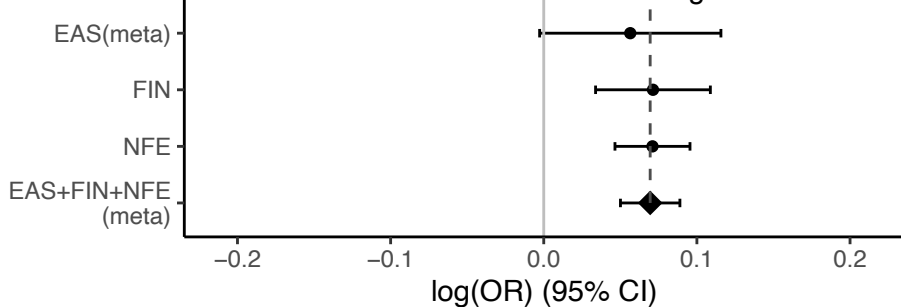

# IBD

chr10:99524480:T:G rs4409764 NKX2-3

Reference allele: T Effect allele: G

Reported: NFE,EAS

Source: EUR+EAS

Pval: 3.051e-29 HetPval: 0.2737

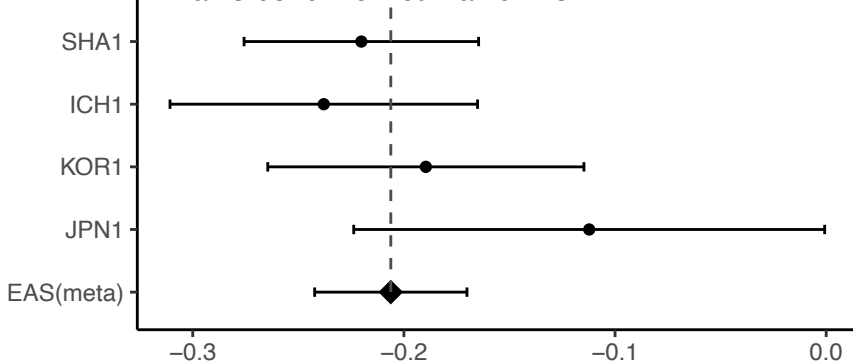

Pval: 3.44e-72 HetPval: 4.02e-02 logBF: 70

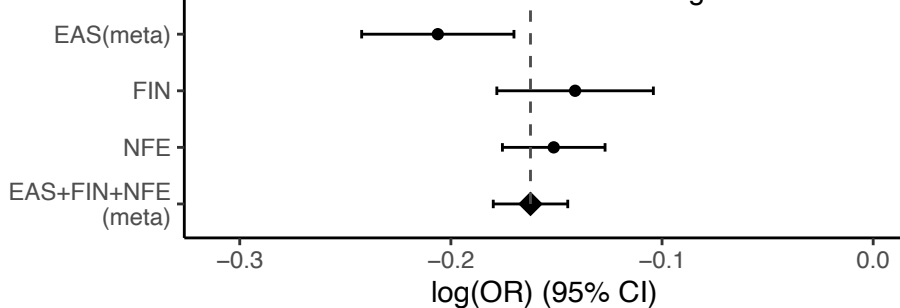

# IBD

chr11:1853062:G:A rs907613 TNNI2

Reference allele: G Effect allele: A

Reported: NFE,EAS

Source: EUR+EAS

Pval:  $6.015e-05$  HetPval: 0.7381

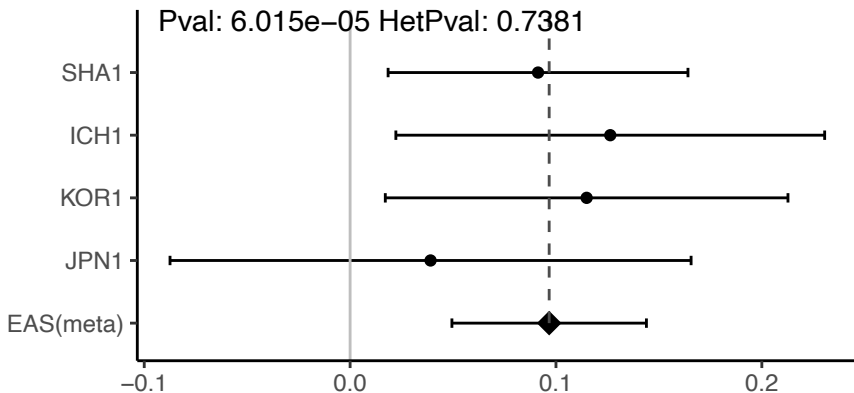

Pval:  $4.55e-13$  HetPval:  $7.79e-01$  logBF: 11

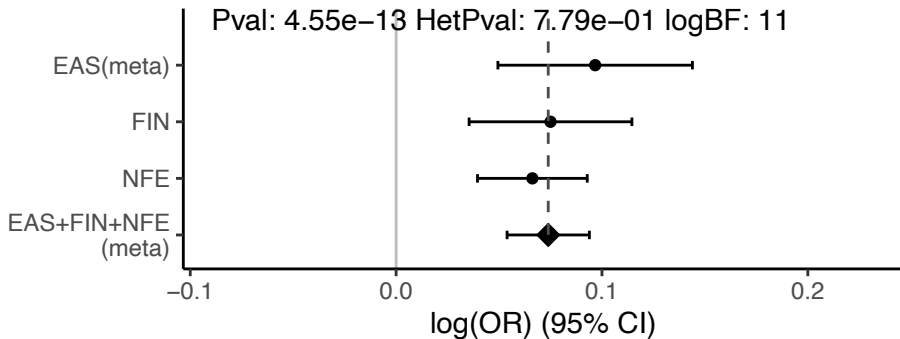

# IBD

chr11:17311651:A:G rs9645621 NUCB2

Reference allele: A Effect allele: G

Reported: NEW

Source: EUR+EAS

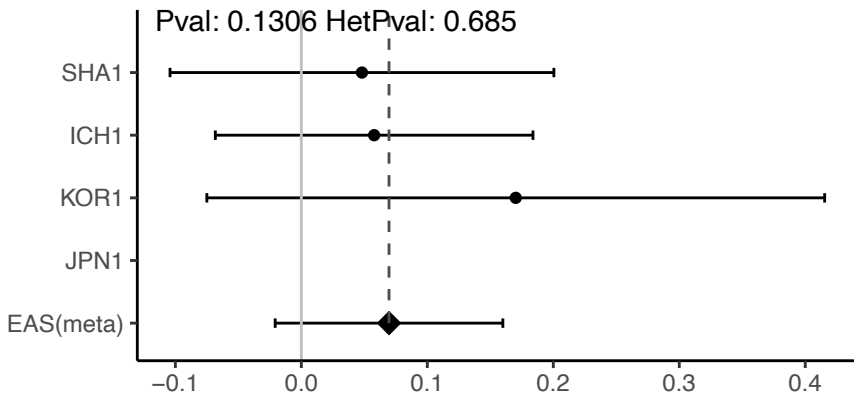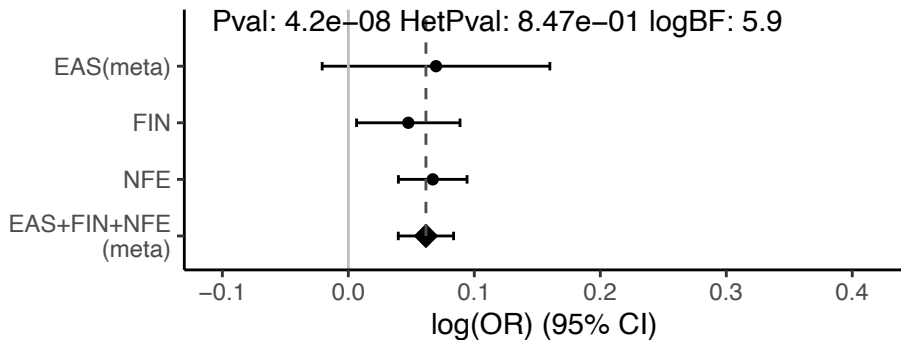

# IBD

chr11:36410895:C:T rs77531520 PRR5L

Reference allele: C Effect allele: T

Reported: NEW

Source: EUR+EAS

Pval: 0.01919 HetPval: 0.4038

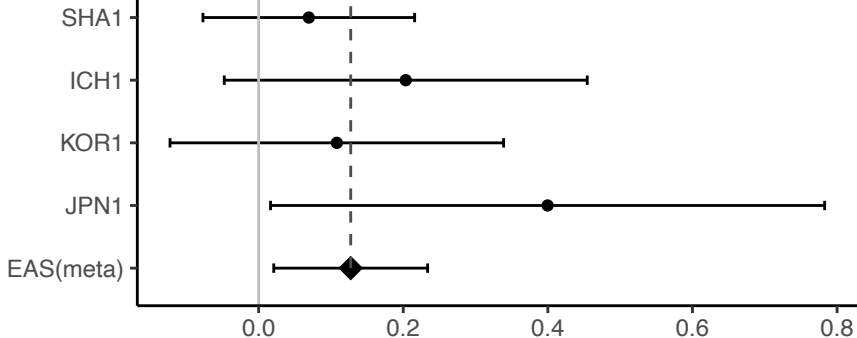

Pval: 1.44e-08 HetPval: 7.09e-01 logBF: 6.6

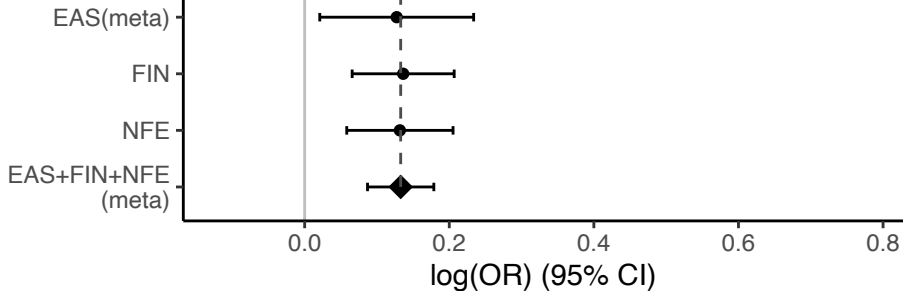

# IBD

chr11:56679337:A:T rs181068528 OR5AR1

Reference allele: A Effect allele: T

Reported: NEW

Source: EUR+EAS

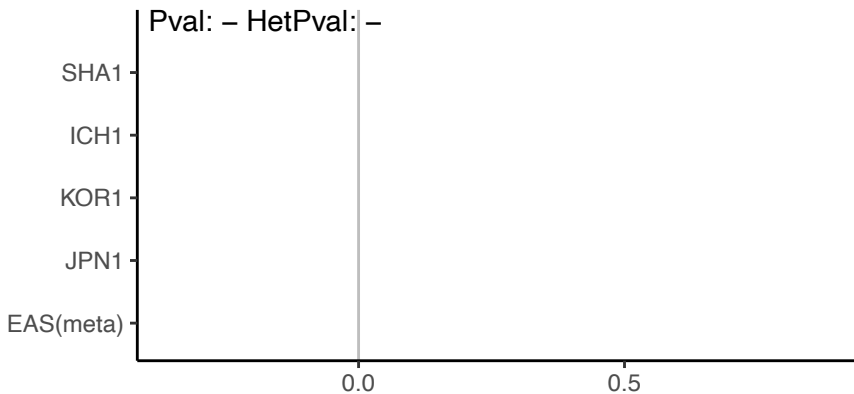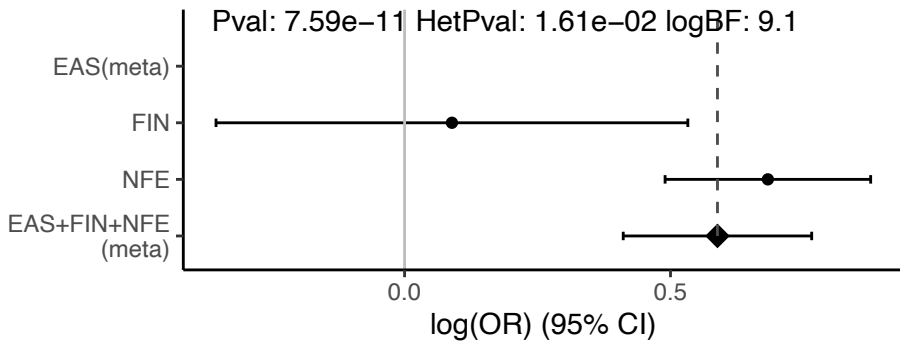



# IBD

chr11:61008737:C:T rs11230563 CD6

Reference allele: C Effect allele: T

Reported: NFE

Source: EUR+EAS

Pval: 0.01207 HetPval: 0.1188

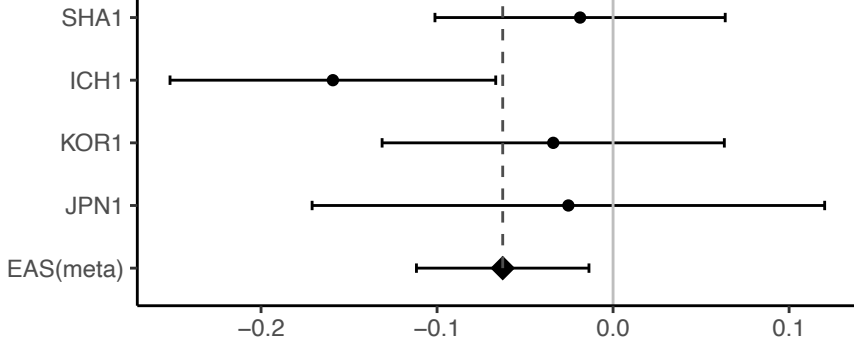

Pval:  $3.11e-11$  HetPval:  $2.04e-01$  logBF: 8.9

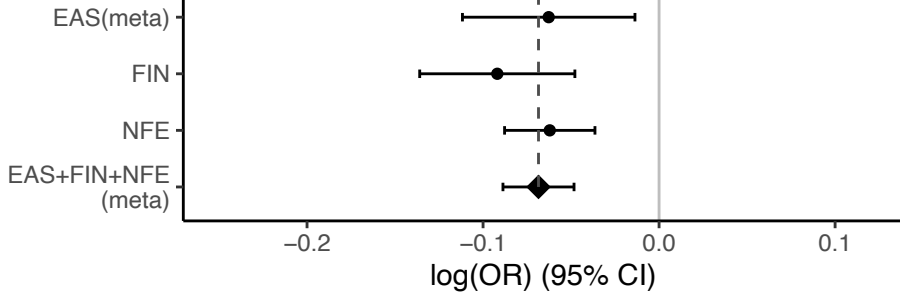

# IBD

chr11:61820833:A:G rs174564 FADS1

Reference allele: A Effect allele: G

Reported: NFE

Source: EUR+EAS

Pval:  $1.049 \times 10^{-7}$  HetPval: 0.6678

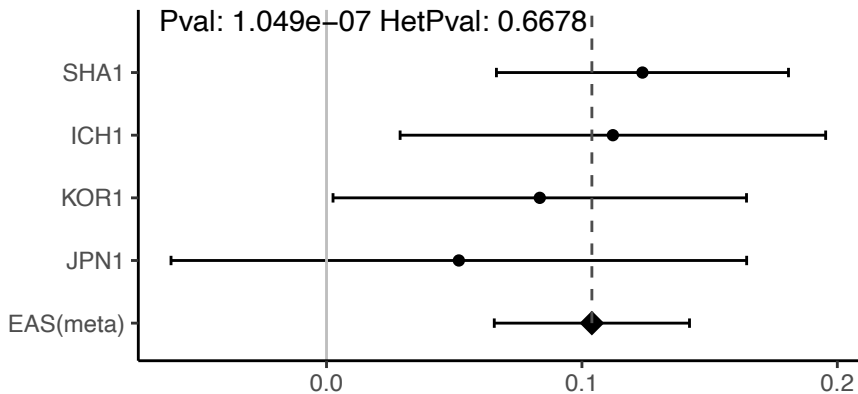

Pval:  $8.36 \times 10^{-16}$  HetPval:  $1.82 \times 10^{-1}$  logBF: 14

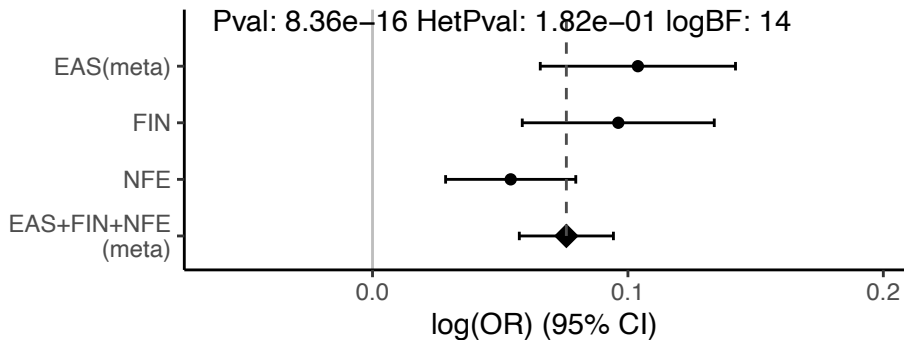

# IBD

chr11:76587581:G:GT rs71040008 EMSY

Reference allele: G Effect allele: GT

Reported: NFE

Source: EUR+EAS

Pval: - HetPval: -

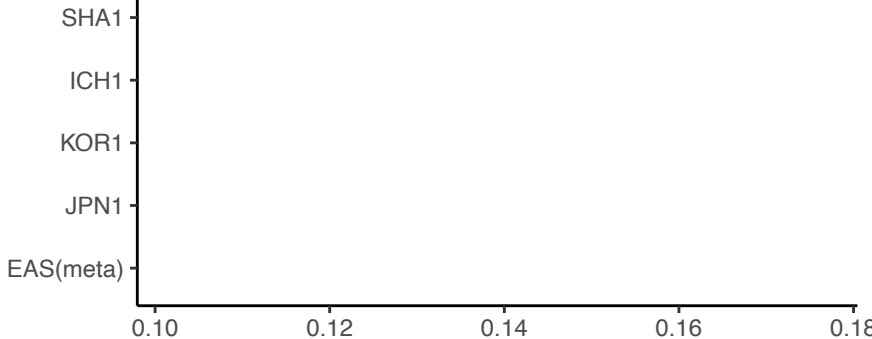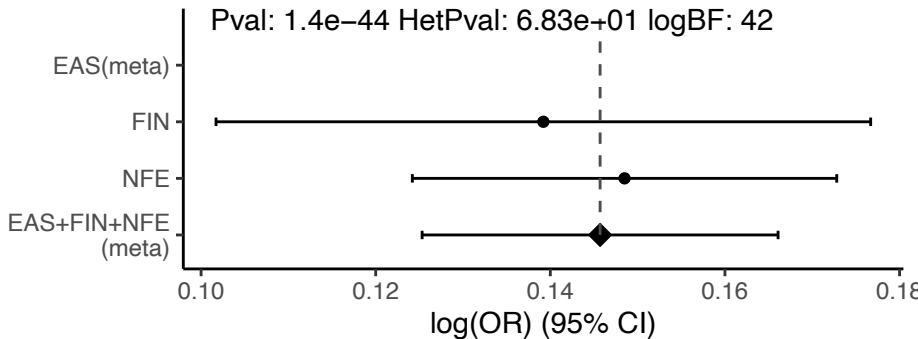

# IBD

chr11:91270280:A:G rs79608745 LINC02748

Reference allele: A Effect allele: G

Reported: NEW

Source: EUR+EAS

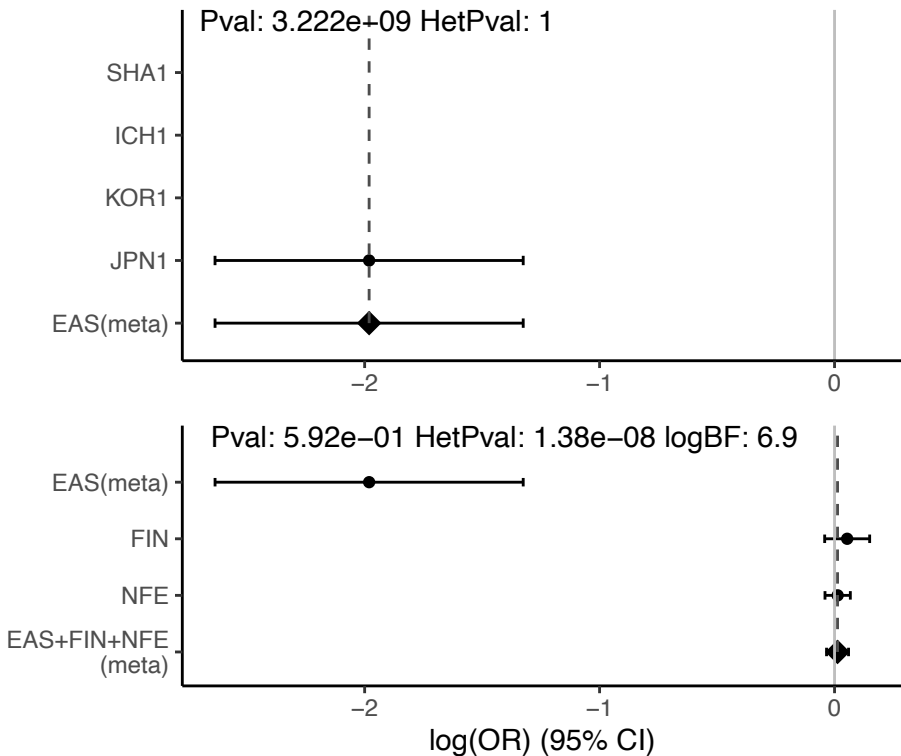

# IBD

chr11:118884921:T:C rs3176905 CXCR5

Reference allele: T Effect allele: C

Reported: NFE

Source: EAS

Pval: 3.262e-08 HetPval: 0.2069

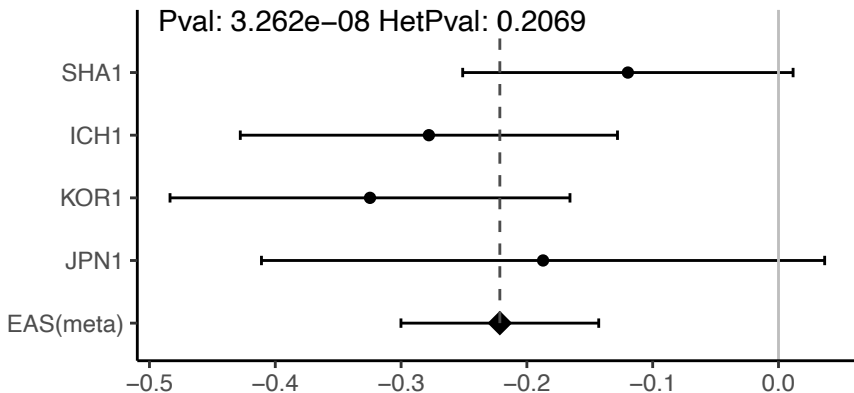

Pval: 8.66e-04 HetPval: 6.56e-05 logBF: 5

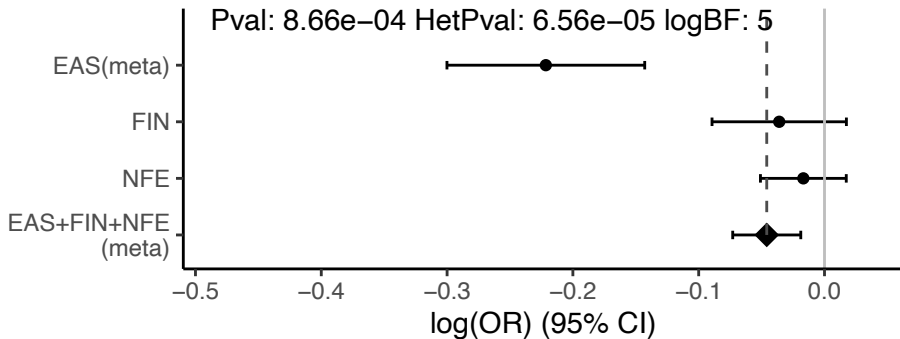

# IBD

chr12:37910758:G:A rs181198871 -

Reference allele: G Effect allele: A

Reported: NEW

Source: EUR+EAS

Pval: - HetPval: -

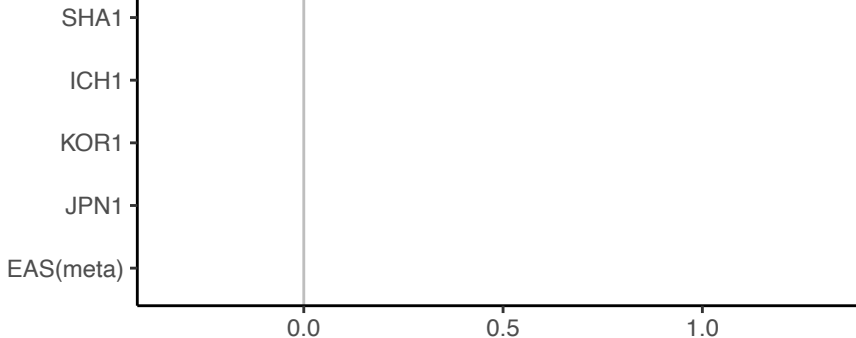

Pval:  $6.36 \times 10^{-6}$  HetPval:  $2.9 \times 10^{-6}$  logBF: 8.3

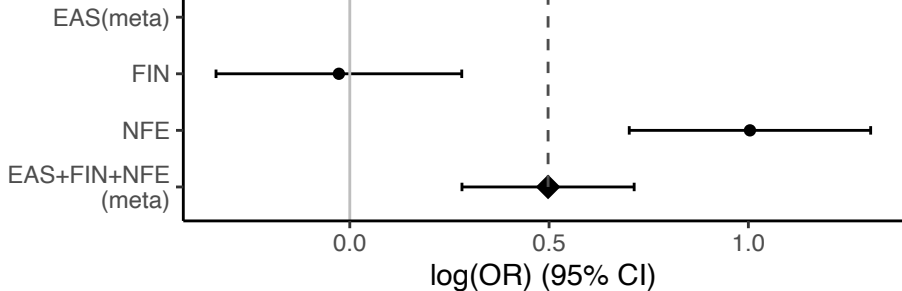

# IBD

chr12:56076060:G:A rs199762200 ERBB3

Reference allele: G Effect allele: A

Reported: NEW

Source: EUR+EAS

Pval: 6.692e-07 HetPval: 0.2703

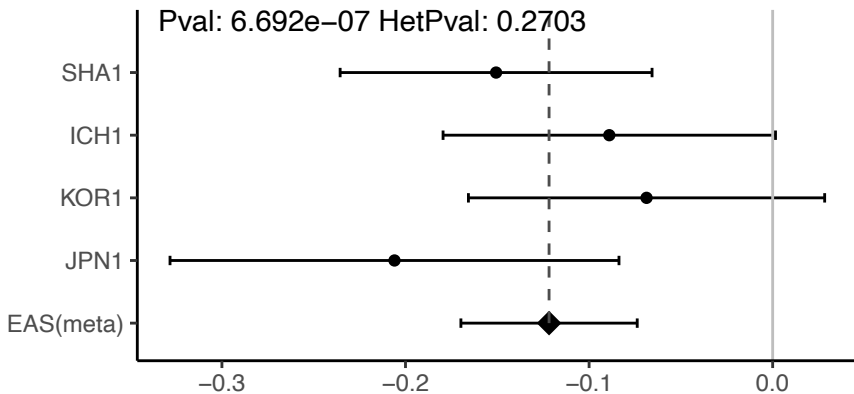

Pval: 7.18e-09 HetPval: 4.15e-01 logBF: 6.8

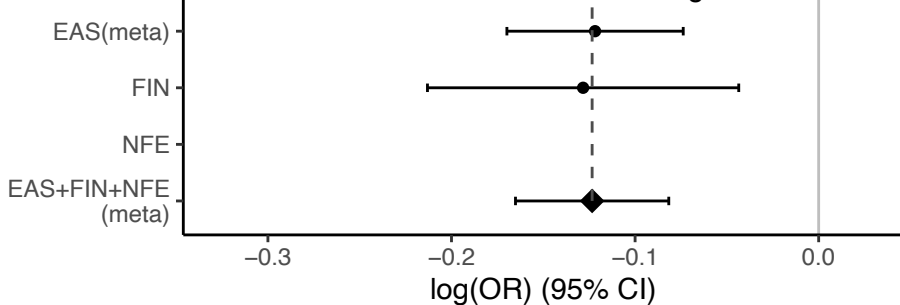

# IBD

chr12:68111348:G:A rs1558746 IFNG

Reference allele: G Effect allele: A

Reported: NFE

Source: EUR+EAS

Pval: 0.004667 HetPval: 0.7758

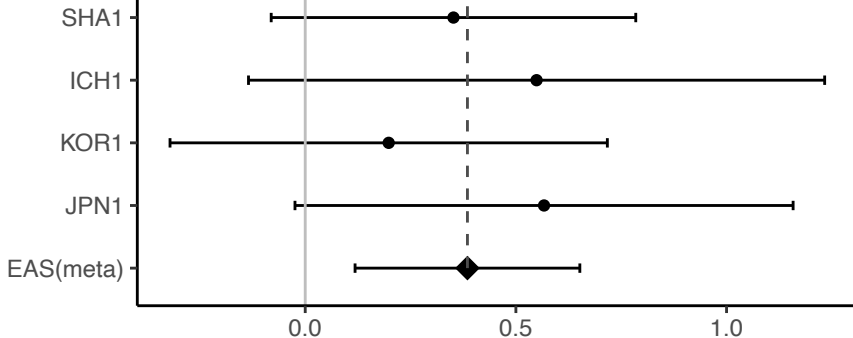

Pval: 1.34e-26 HetPval: 3.41e-01 logBF: 24

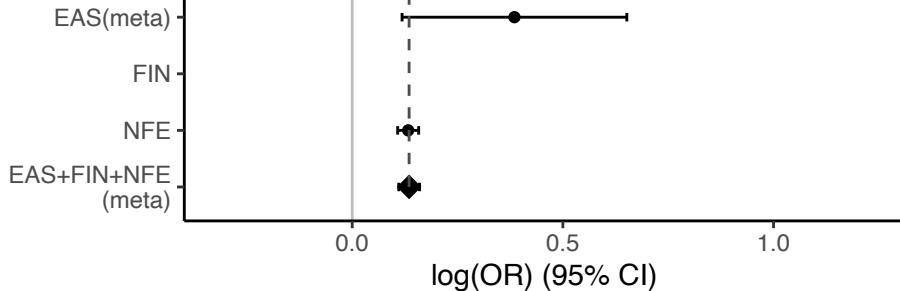



# IBD

chr12:69348988:AT:A rs61576454 LYZ

Reference allele: AT Effect allele: A

Reported: NEW

Source: EUR+EAS

Pval: 0.2891 HetPval: 0.5747

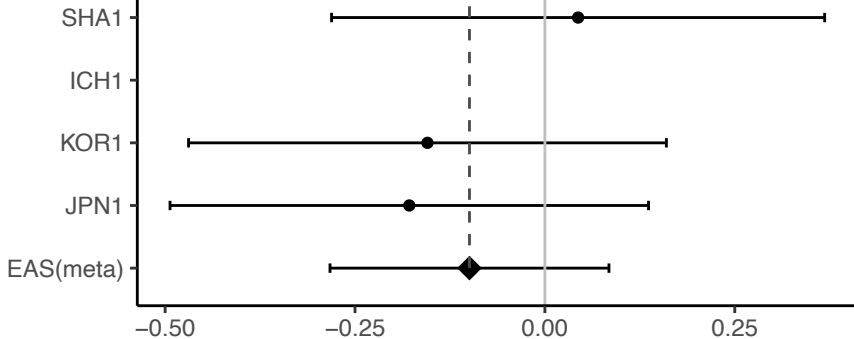

Pval: 4.3e-08 HetPval: 7.65e-01 logBF: 6

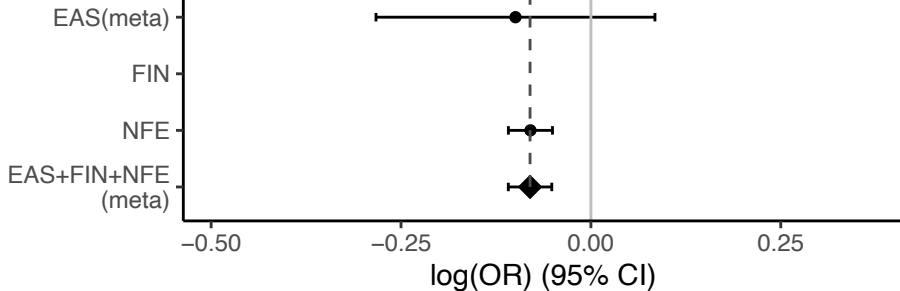

# IBD

chr12:112172910:G:A rs11066188 HECTD4

Reference allele: G Effect allele: A

Reported: NFE

Source: EUR+EAS

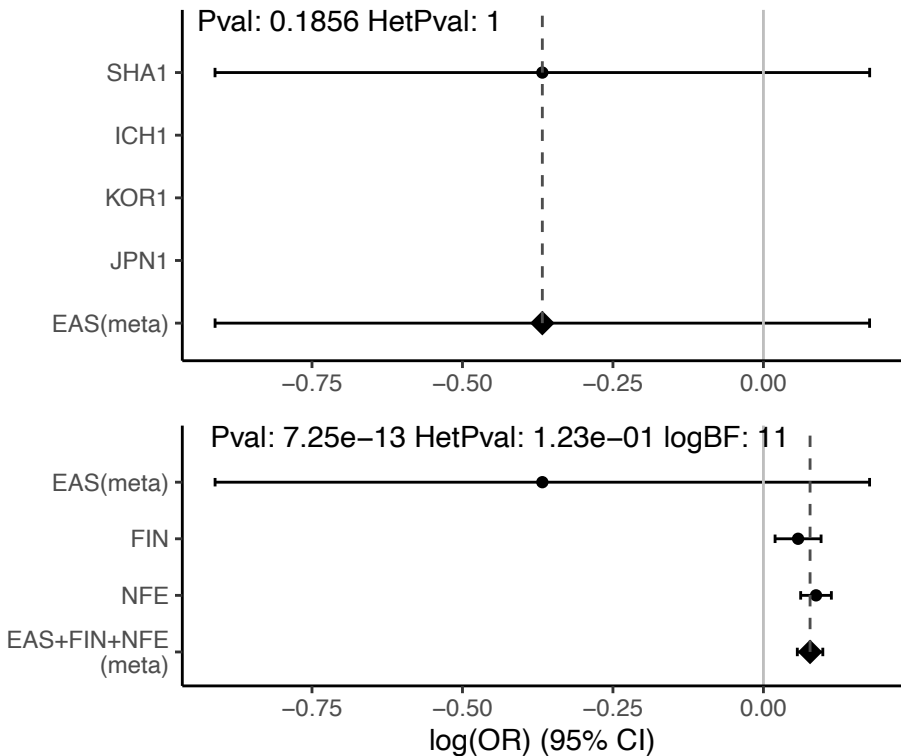

# IBD

chr12:116408331:C:T rs113281820 MIR4472-2

Reference allele: C Effect allele: T

Reported: NEW

Source: EAS

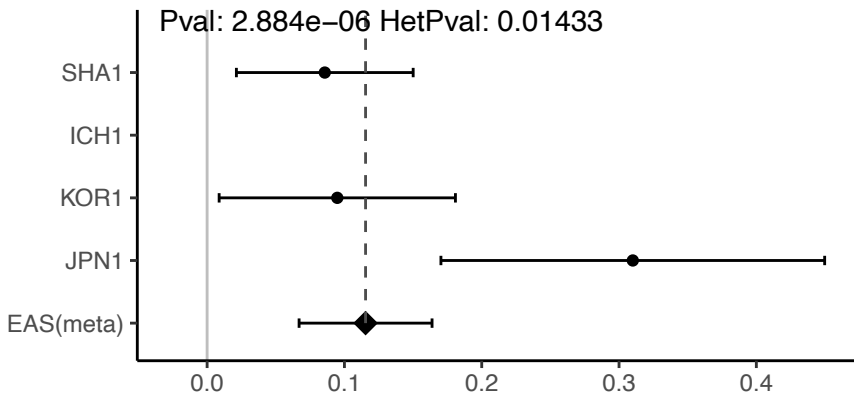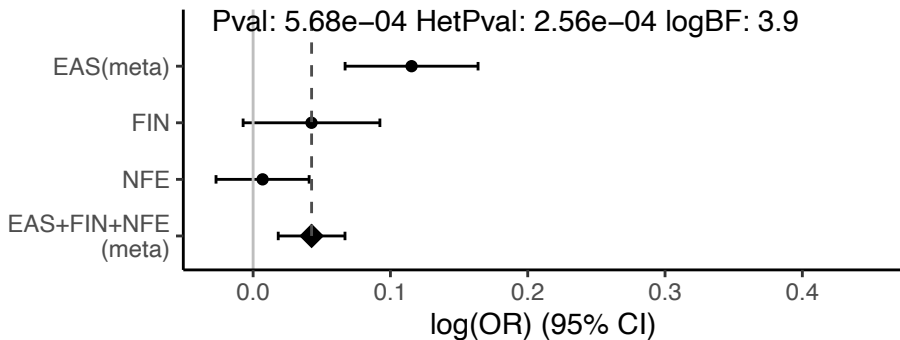

# IBD

chr12:119709120:G:A rs11064881 CIT

Reference allele: G Effect allele: A

Reported: NFE

Source: EUR+EAS

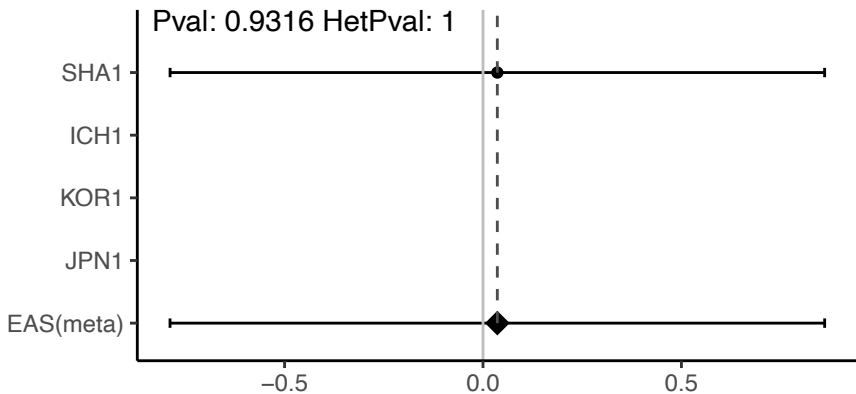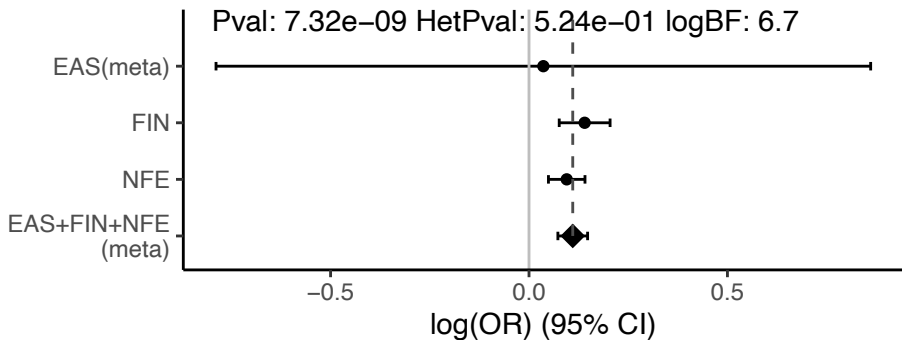

# IBD

chr13:40965681:A:C rs17630801 ELF1

Reference allele: A Effect allele: C

Reported: NFE,EAS

Source: EUR+EAS

Pval:  $7.08e-21$  HetPval: 0.7459

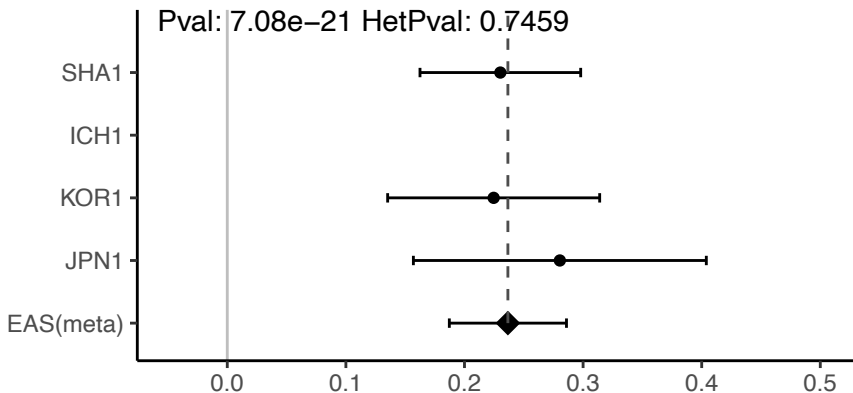

Pval:  $2.35e-20$  HetPval:  $2.32e-02$  logBF: 19

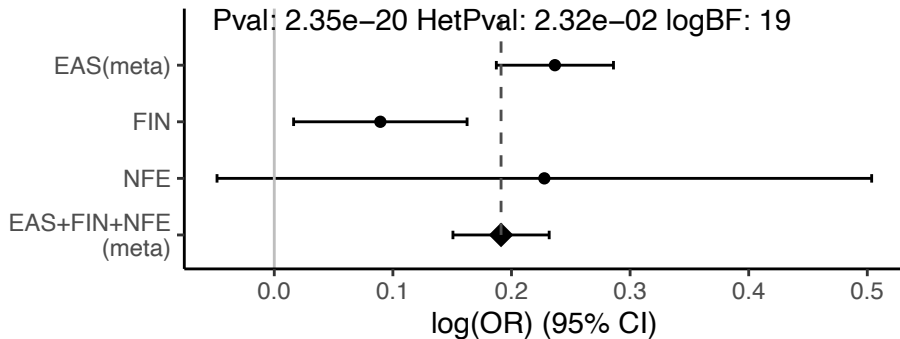

# IBD

chr13:49021195:A:G rs2026029 FNDC3A

Reference allele: A Effect allele: G

Reported: NFE

Source: EUR+EAS

Pval: 1.761e-06 HetPval: 0.272

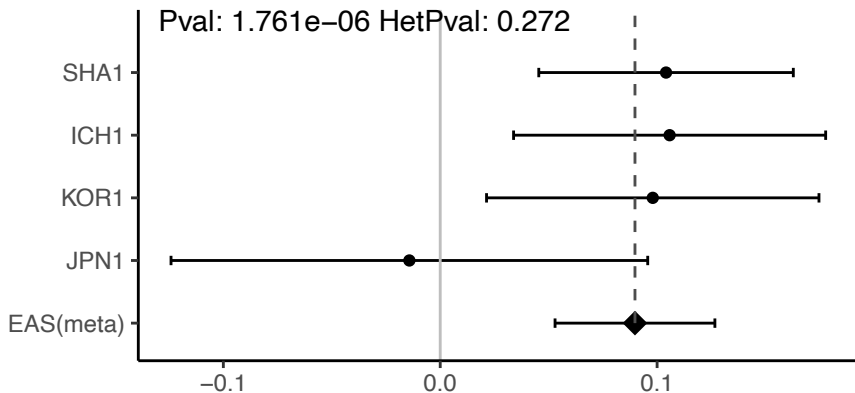

Pval: 3.98e-08 HetPval: 6.45e-02 logBF: 6.2

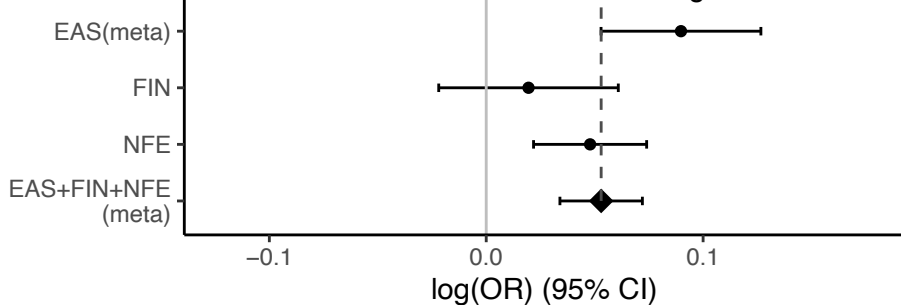

# IBD

chr13:52062509:C:T rs184429843 NEK5

Reference allele: C Effect allele: T

Reported: NEW

Source: EUR+EAS

Pval: - HetPval: -

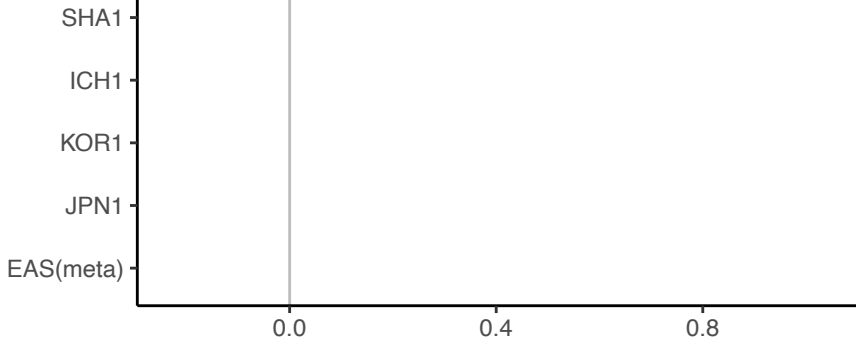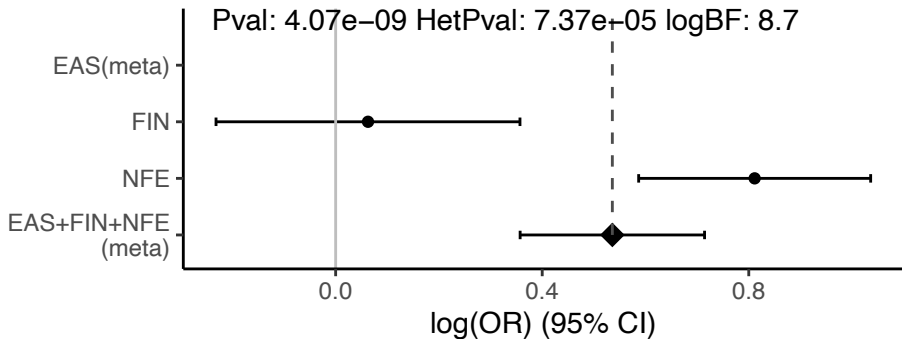

# IBD

chr13:99348586:A:T rs9585037 UBAC2

Reference allele: A Effect allele: T

Reported: NFE

Source: EUR+EAS

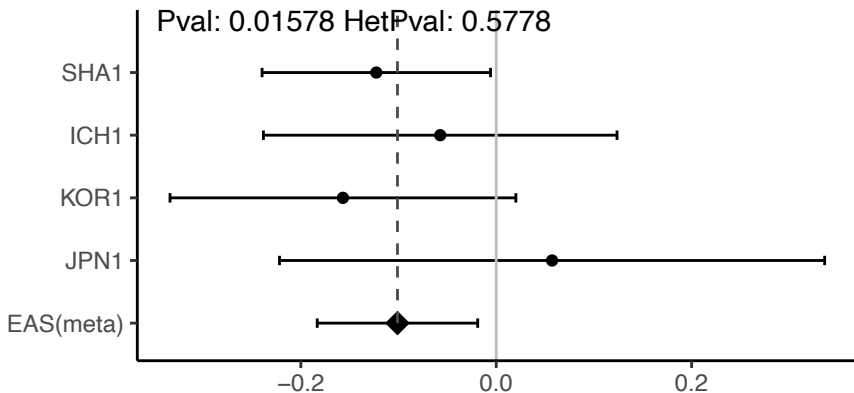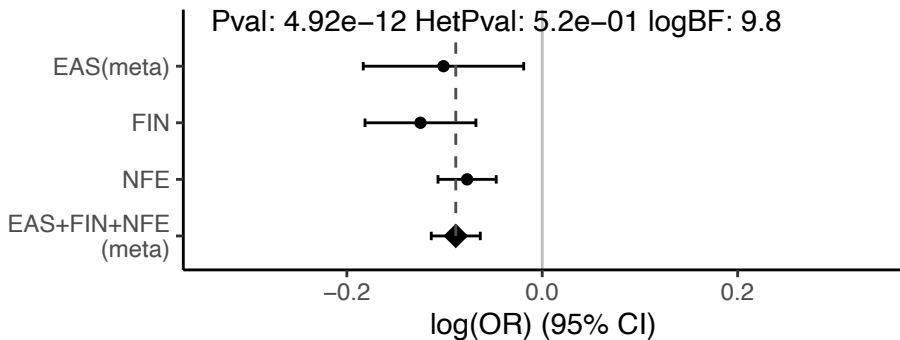



# IBD

chr14:68816170:C:T rs194746 ZFP36L1

Reference allele: C Effect allele: T

Reported: NFE

Source: EUR+EAS

Pval: 0.001013 HetPval: 0.3765

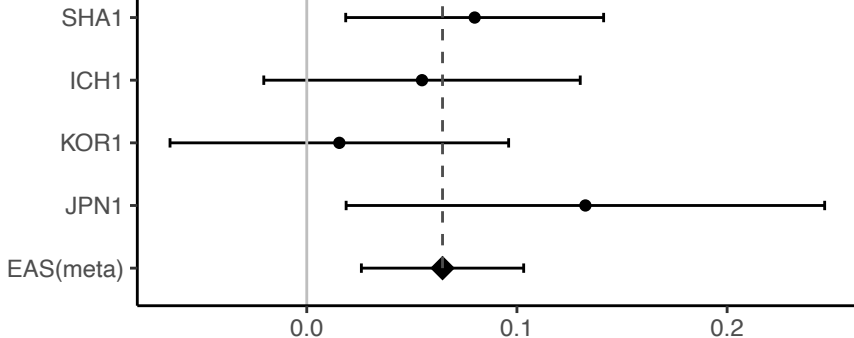

Pval: 3.46e-17 HetPval: 5.85e-01 logBF: 15

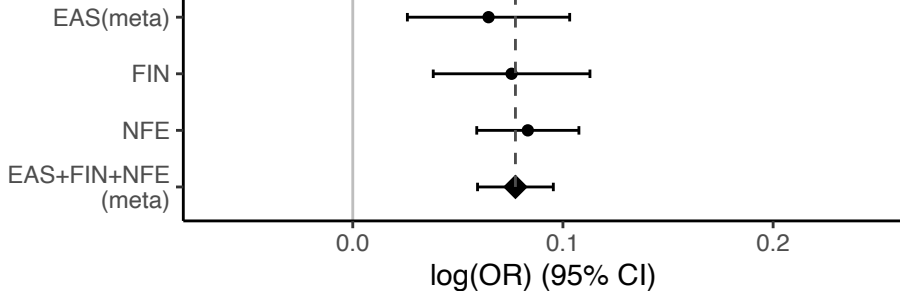

# IBD

chr14:75275048:C:T rs1569328 FOS

Reference allele: C Effect allele: T

Reported: NFE

Source: EUR+EAS

Pval:  $1.117e-09$  HetPval: 0.957

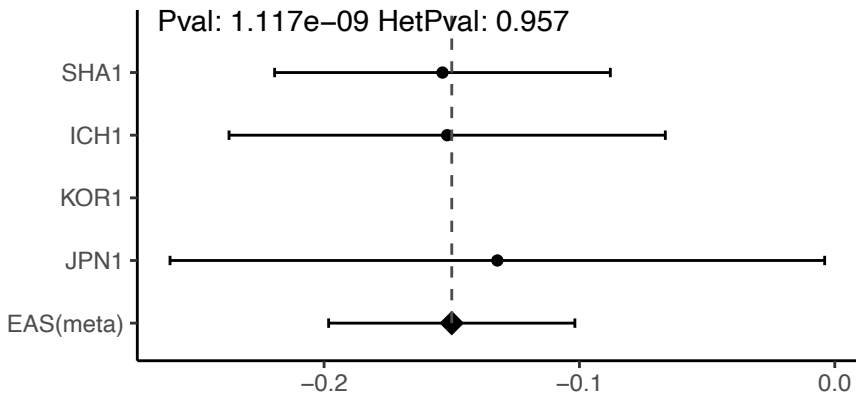

Pval:  $3.09e-13$  HetPval:  $7.79e-02$  logBF: 11

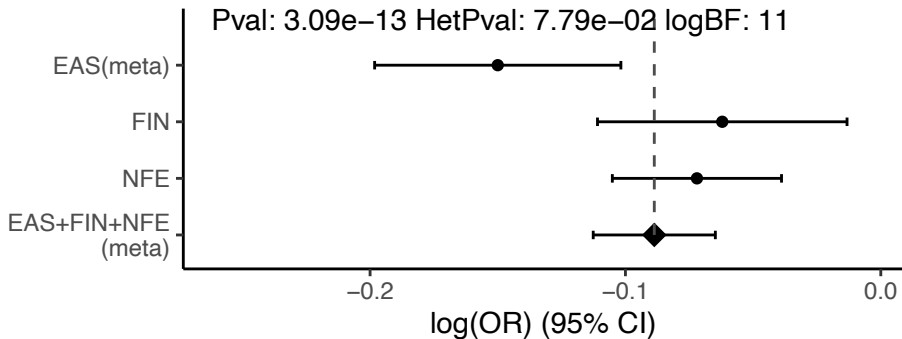

# IBD

chr14:87959953:T:C rs4462528 GALC

Reference allele: T Effect allele: C

Reported: NFE

Source: EUR+EAS

Pval:  $8.358e-12$  HetPval: 0.8493

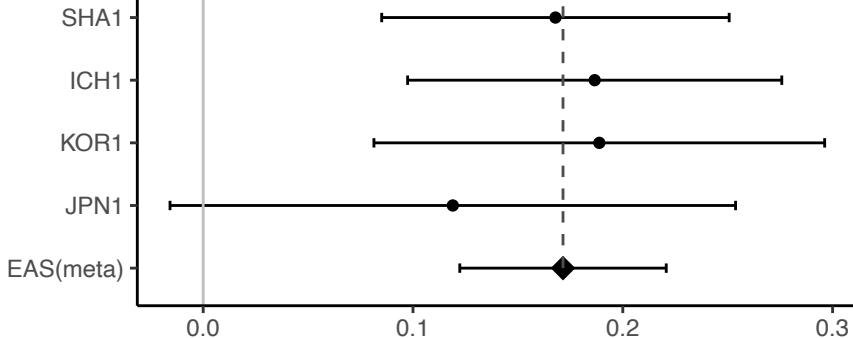

Pval:  $5.48e-24$  HetPval:  $3.62e-01$  logBF: 22

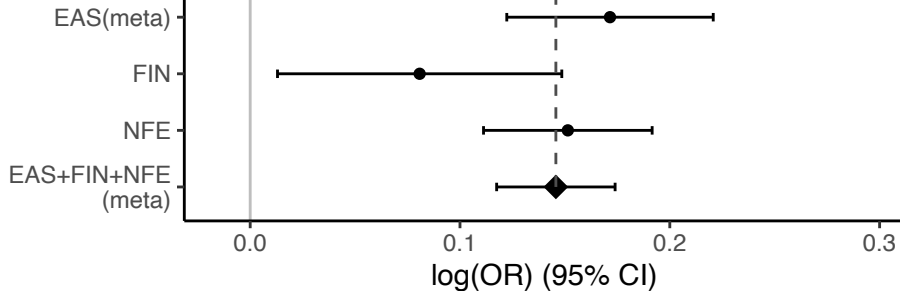

# IBD

chr14:105686797:A:G rs11627111 ELK2AP

Reference allele: A Effect allele: G

Reported: NEW

Source: EUR+EAS

Pval: - HetPval: -

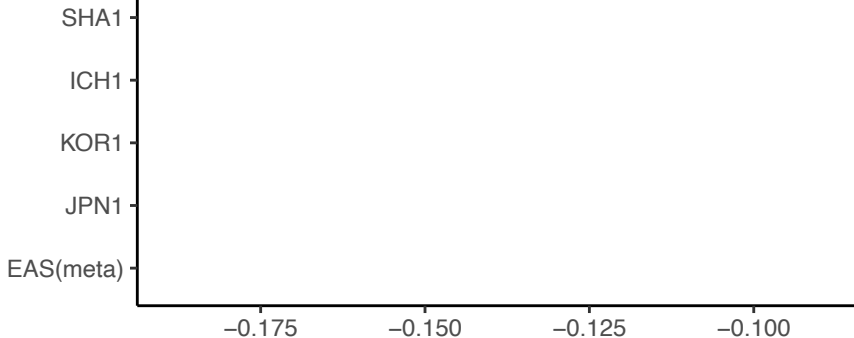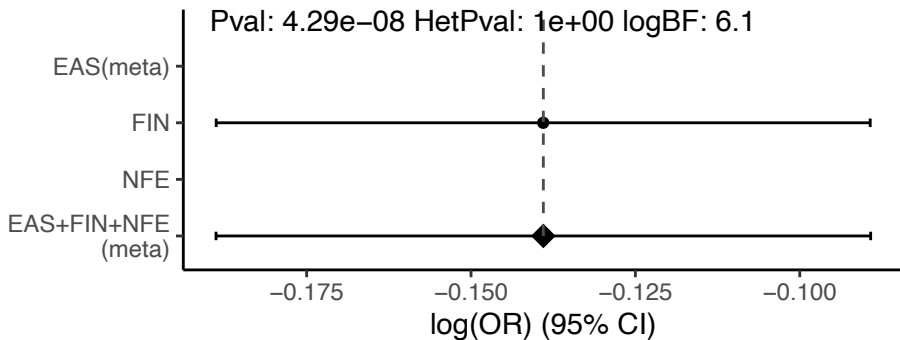

# IBD

chr15:60777789:C:T rs11071559 RORA

Reference allele: C Effect allele: T

Reported: NEW

Source: EUR+EAS

Pval: 0.08484 HetPval: 0.8339

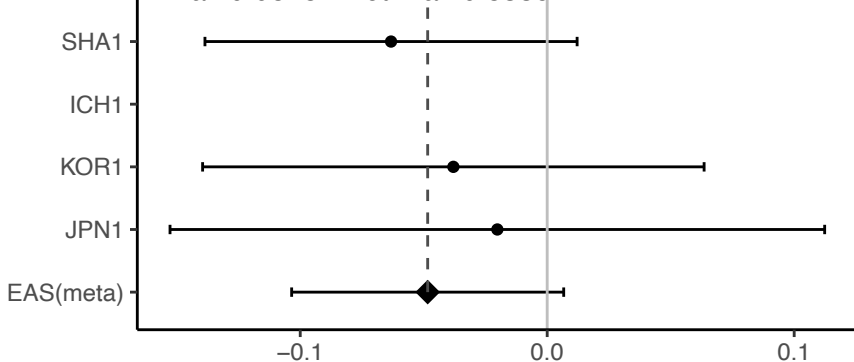

Pval: 1.2e-09 HetPval: 6.94e-01 logBF: 7.6

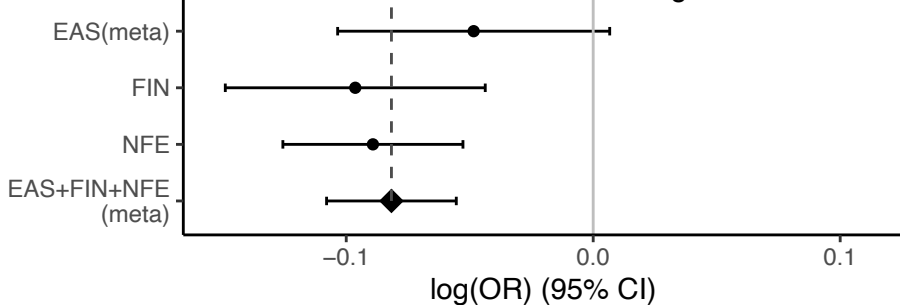

# IBD

chr15:67156025:G:A rs56375023 SMAD3

Reference allele: G Effect allele: A

Reported: NFE

Source: EUR+EAS

Pval: 0.006158 HetPval: 0.5498

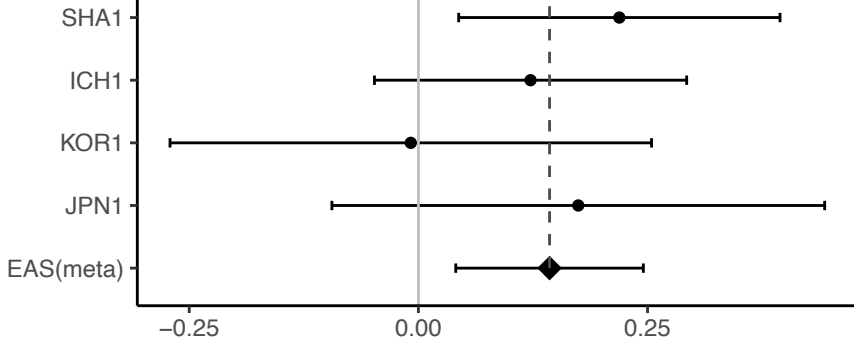

Pval: 1.52e-23 HetPval: 7.07e-02 logBF: 21

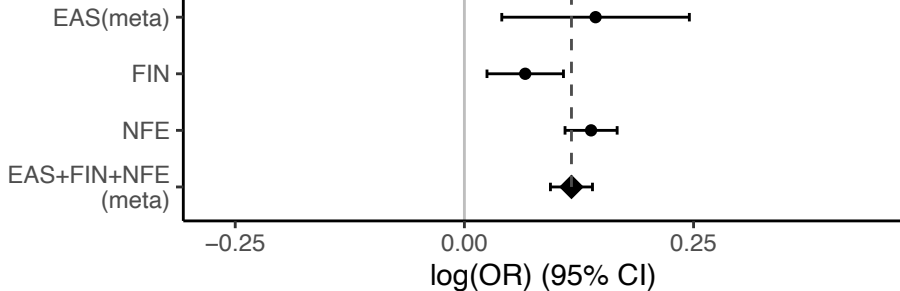

# IBD

chr15:79913012:A:G rs1864239 ST20

Reference allele: A Effect allele: G

Reported: NEW

Source: EUR+EAS

Pval: 0.1096 HetPval: 0.7773

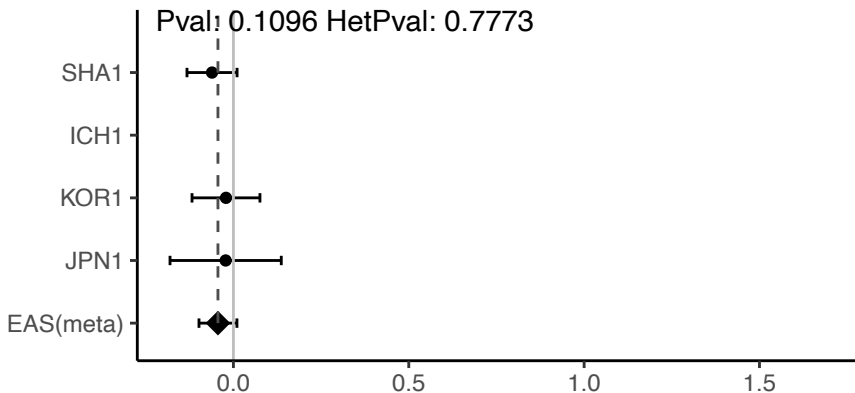

Pval: 3.61e-01 HetPval: 3.78e-12 logBF: 12

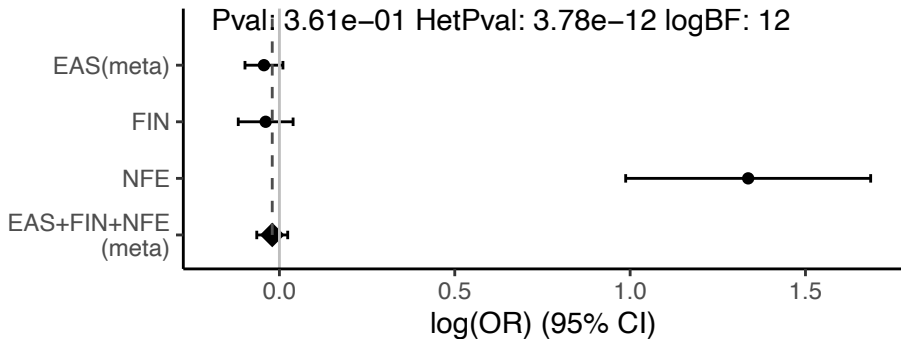

# IBD

chr15:80675204:T:C rs12440543 ABHD17C

Reference allele: T Effect allele: C

Reported: NEW

Source: EUR+EAS

Pval: 0.0001339 HetPval: 0.9451

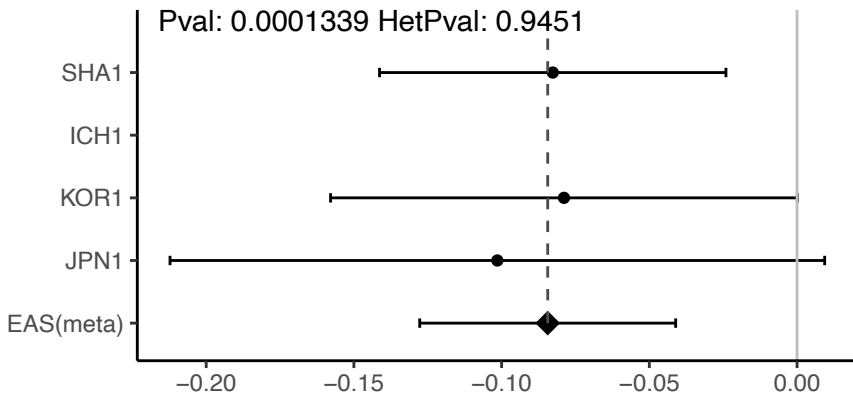

Pval: 1.48e-09 HetPval: 8.53e-01 logBF: 7.5

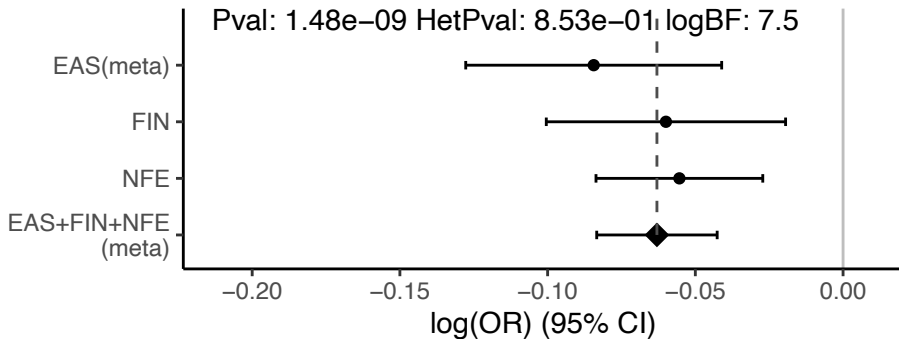



# IBD

chr15:90600362:C:T rs71407313 CRT3

Reference allele: C Effect allele: T

Reported: NFE

Source: EUR+EAS

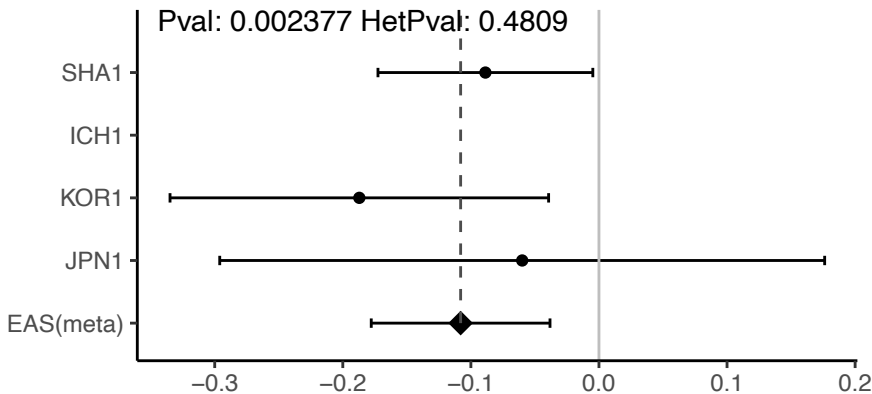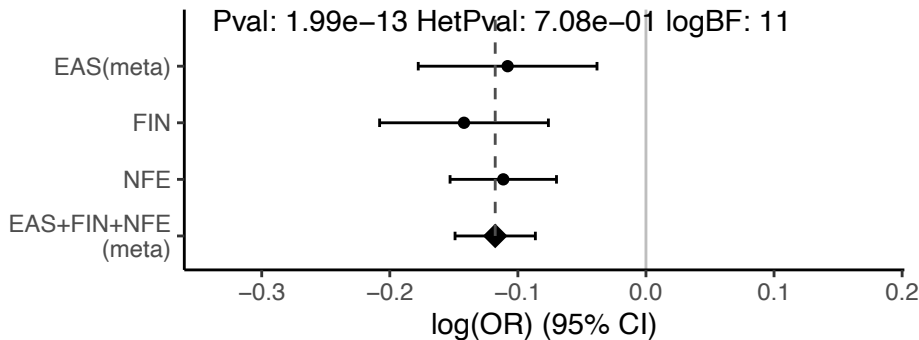

# IBD

chr16:2117121:C:T rs191241541 PKD1

Reference allele: C Effect allele: T

Reported: NEW

Source: EUR+EAS

Pval: - HetPval: -

SHA1

ICH1

KOR1

JPN1

EAS(meta)

0.0

0.5

1.0

Pval:  $2.8e-09$  HetPval:  $2.39e-07$  logBF: 12

EAS(meta)

FIN

NFE

EAS+FIN+NFE  
(meta)

0.0

0.5

1.0

log(OR) (95% CI)

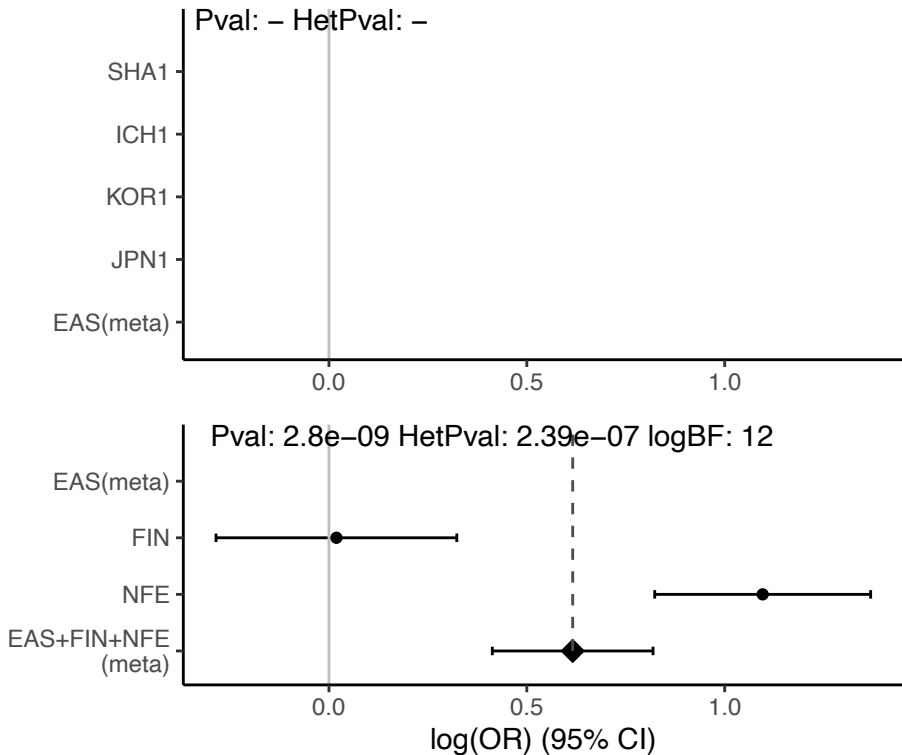

# IBD

chr16:11610795:C:A rs11641184 LITAF

Reference allele: C Effect allele: A

Reported: NFE,EAS

Source: EUR+EAS

Pval:  $8.476e-10$  HetPval: 0.04815

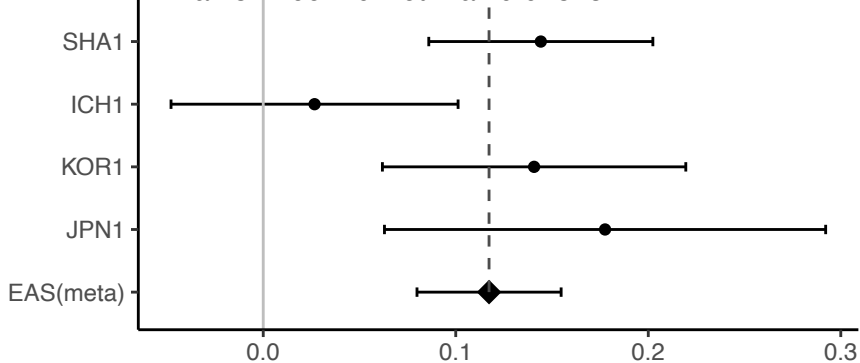

Pval:  $2.14e-18$  HetPval:  $2.56e-02$  logBF: 16

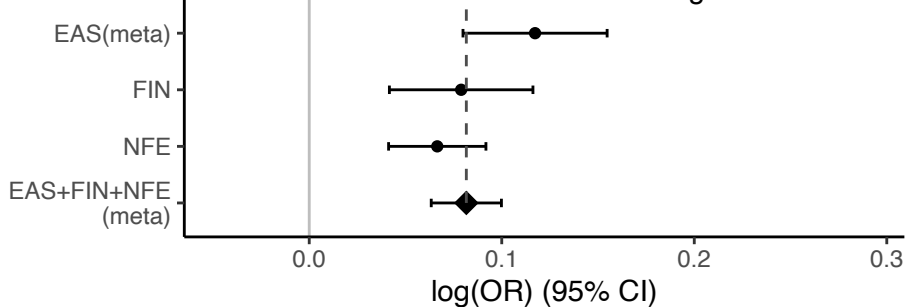

# IBD

chr16:28519966:A:G rs4787458 IL27

Reference allele: A Effect allele: G

Reported: NFE

Source: EUR+EAS

Pval:  $9.705e-07$  HetPval: 0.02939

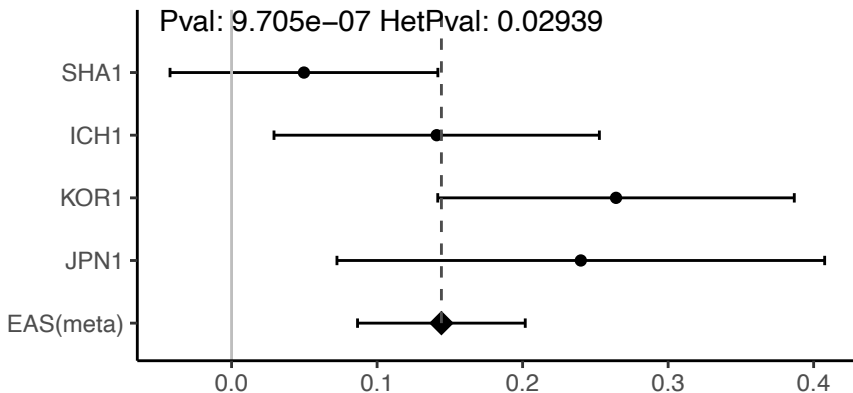

Pval:  $1.96e-18$  HetPval:  $4.26e-03$  logBF: 16

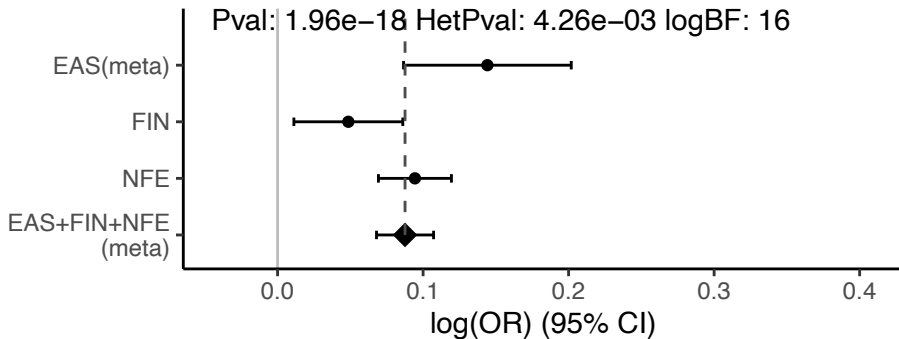

# IBD

chr16:75463237:C:T rs8055490 TMEM170A

Reference allele: C Effect allele: T

Reported: NEW

Source: EUR+EAS

Pval:  $1.24e-06$  HetPval: 0.5301

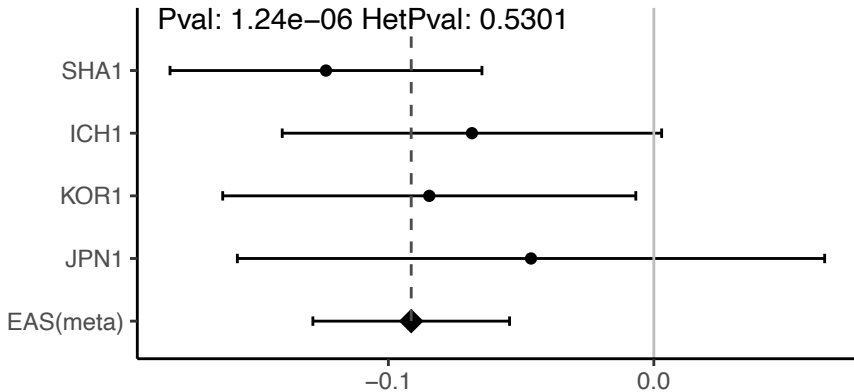

Pval:  $2.75e-08$  HetPval:  $9.18e-02$  logBF: 6.3

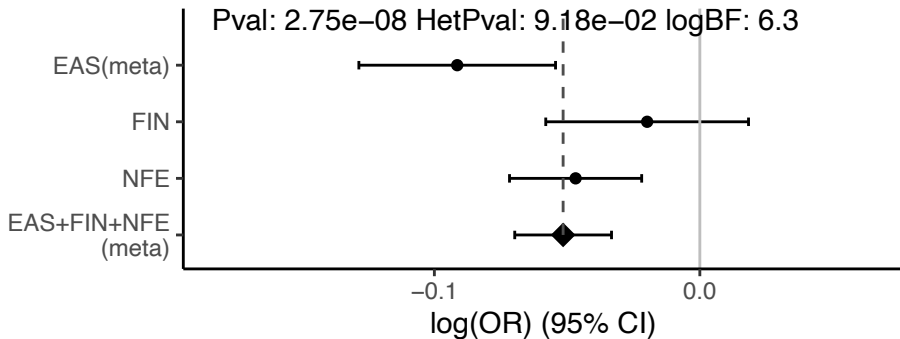

# IBD

chr16:78768798:A:G rs9938250 WWOX

Reference allele: A Effect allele: G

Reported: NEW

Source: EUR+EAS

Pval: 0.02268 HetPval: 0.5898

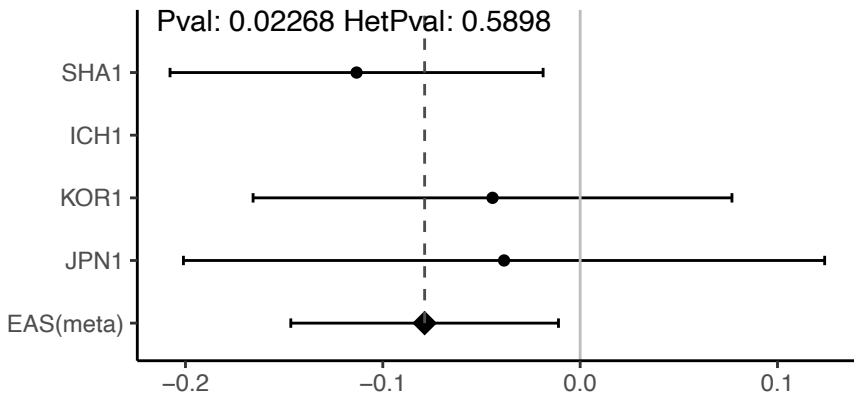

Pval: 2.71e-08 HetPval: 8.7e-01 logBF: 6.1

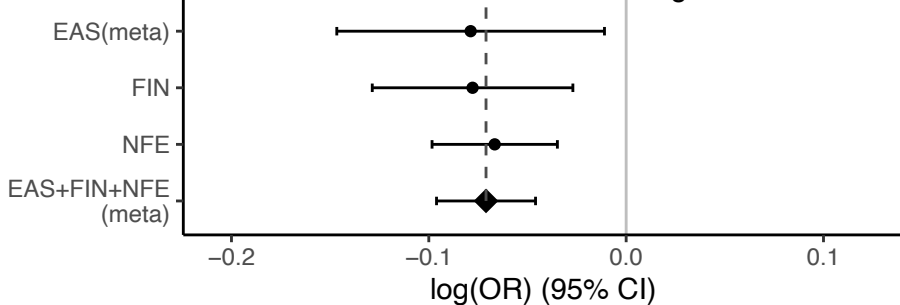

# IBD

chr16:80804680:G:T rs187975120 CDYL2

Reference allele: G Effect allele: T

Reported: EAS

Source: EUR+EAS

Pval:  $3.5e-09$  HetPval: 0.4866

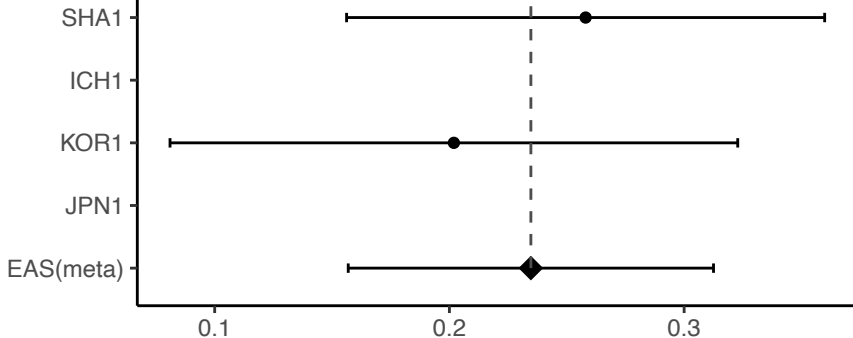

Pval:  $3.5e-09$  HetPval:  $4.87e-01$  logBF: 7

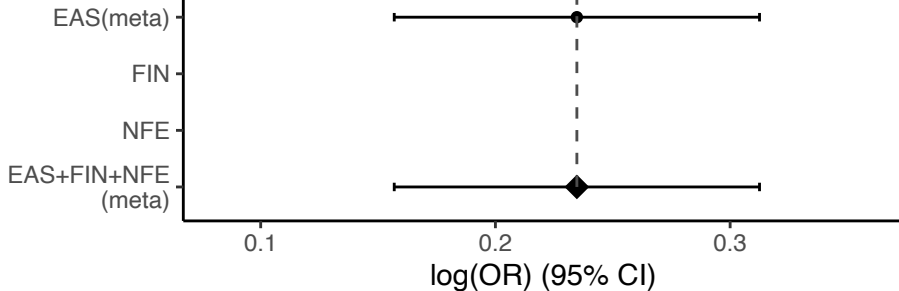

# IBD

chr16:81883307:A:G rs11548656 PLCG2

Reference allele: A Effect allele: G

Reported: NFE

Source: EUR+EAS

Pval: - HetPval: -

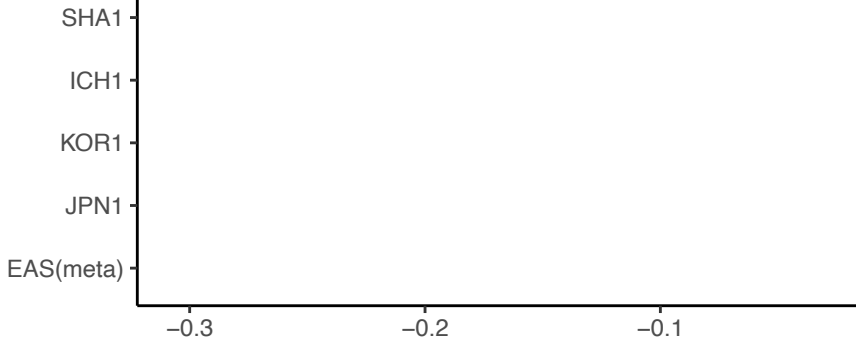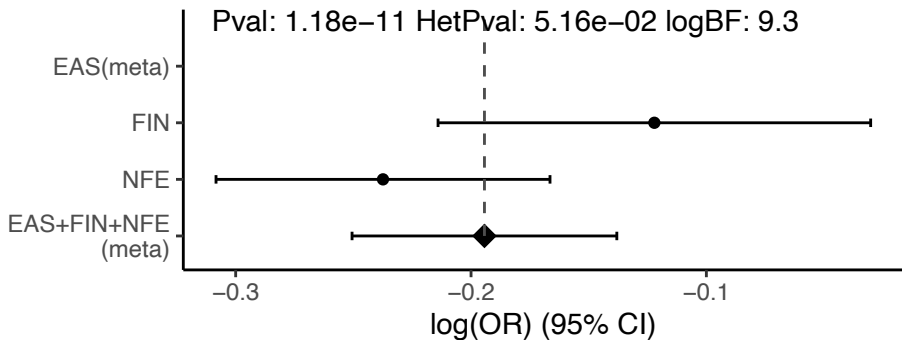



# IBD

chr16:85980635:T:C rs16940202 IRF8

Reference allele: T Effect allele: C

Reported: NFE,EAS

Source: EUR+EAS

Pval:  $1.466 \times 10^{-13}$  HetPval: 0.8744

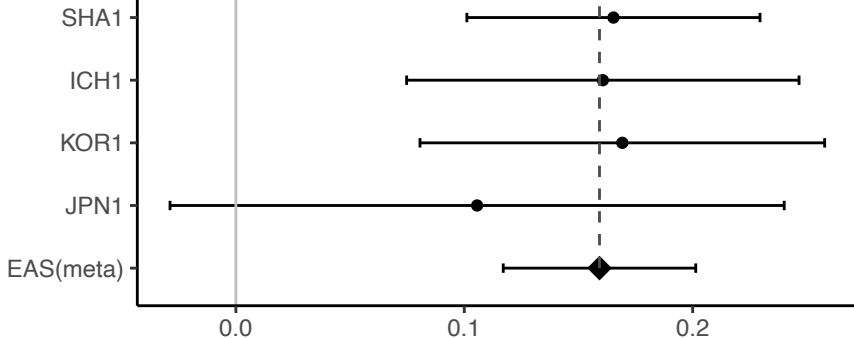

Pval:  $1.24 \times 10^{-25}$  HetPval:  $4.5 \times 10^{-1}$  logBF: 23

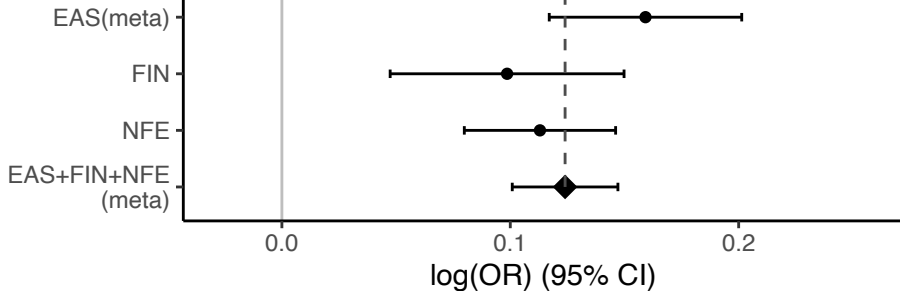

# IBD

chr17:7074375:C:T rs415704 CLEC10A

Reference allele: C Effect allele: T

Reported: NEW

Source: EUR+EAS

Pval: 0.09584 HetPval: 0.8841

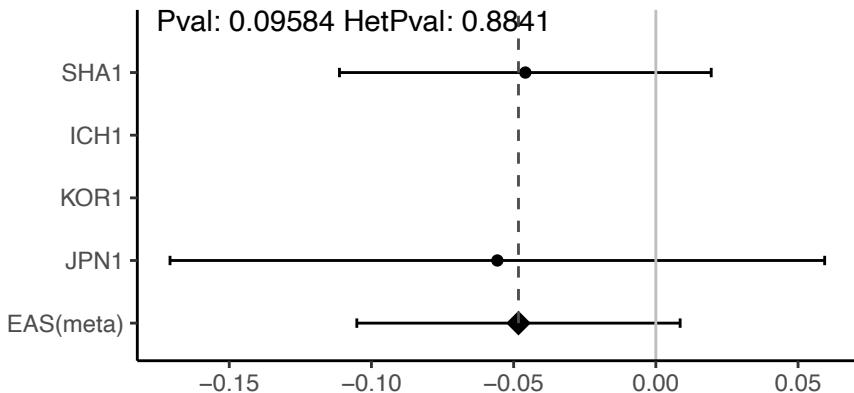

Pval: 3.66e-08 HetPval: 9.56e-01 logBF: 6.1

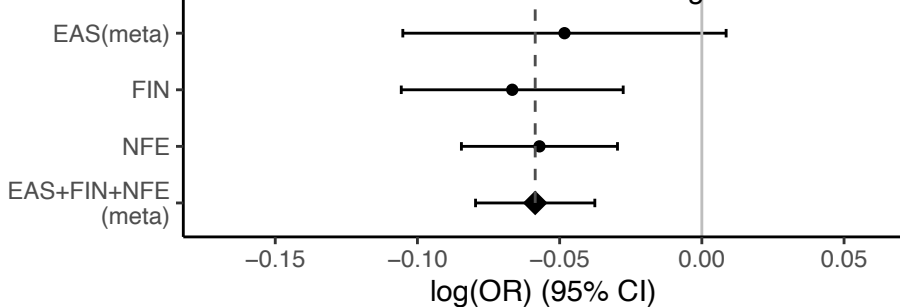

# IBD

chr17:34264425:C:T rs4795894 CCL7

Reference allele: C Effect allele: T

Reported: NFE

Source: EUR+EAS

Pval: 0.005088 HetPval: 0.2805

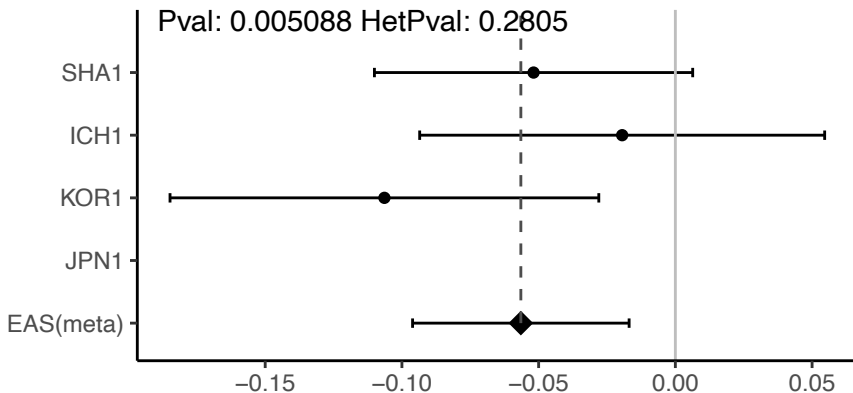

Pval:  $8.33e-19$  HetPval:  $2.05e-01$  logBF: 17

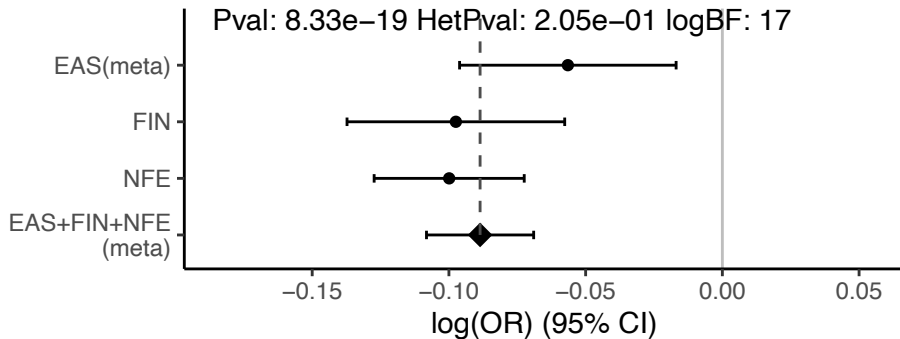

# IBD

chr17:39784555:C:T rs11658993 IKZF3

Reference allele: C Effect allele: T

Reported: NFE

Source: EUR+EAS

Pval: 5.165e-08 HetPval: 0.241

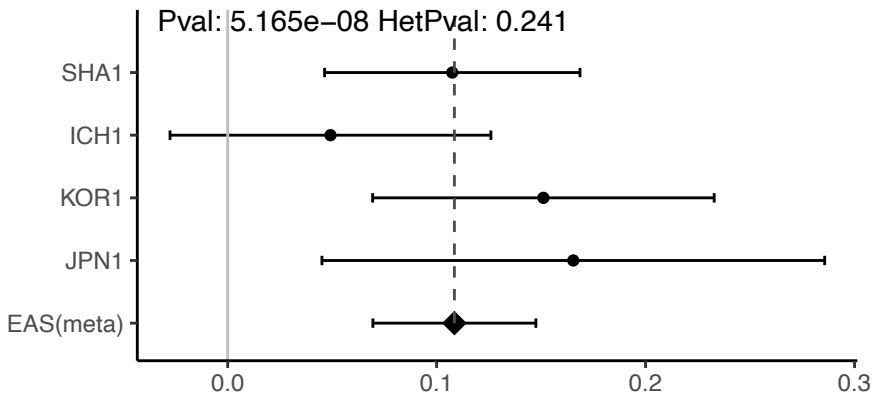

Pval: 1.12e-41 HetPval: 3.3e-01 logBF: 39

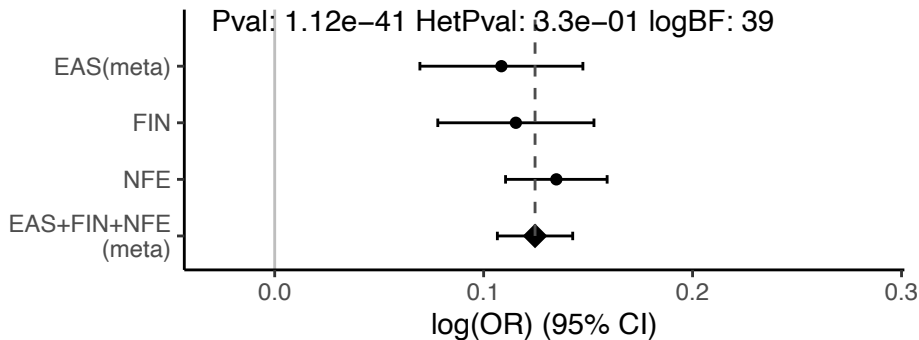

# IBD

chr17:42345810:C:T rs12601611 STAT3

Reference allele: C Effect allele: T

Reported: NFE,EAS

Source: EUR+EAS

Pval: 2.768e-22 HetPval: 0.405

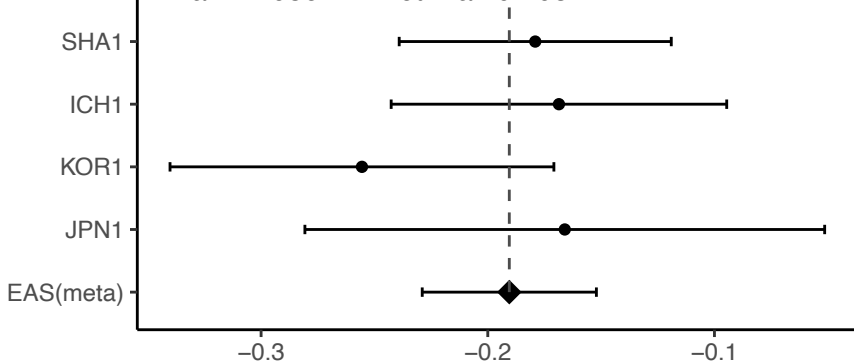

Pval: 8.99e-40 HetPval: 1.08e-02 logBF: 38

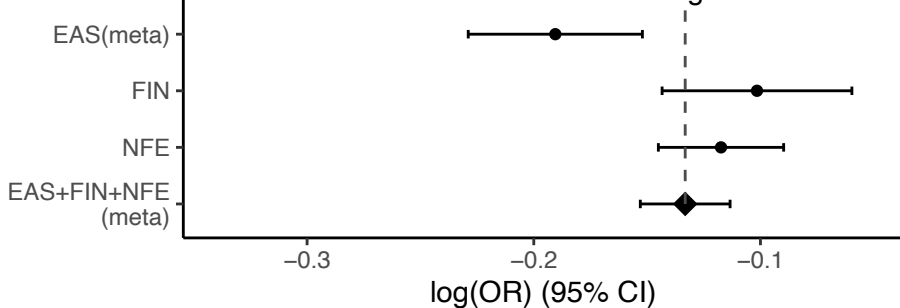

# IBD

chr17:48268286:C:T rs1470831 SKAP1

Reference allele: C Effect allele: T

Reported: NEW

Source: EUR+EAS

Pval: 0.004514 HetPval: 0.6804

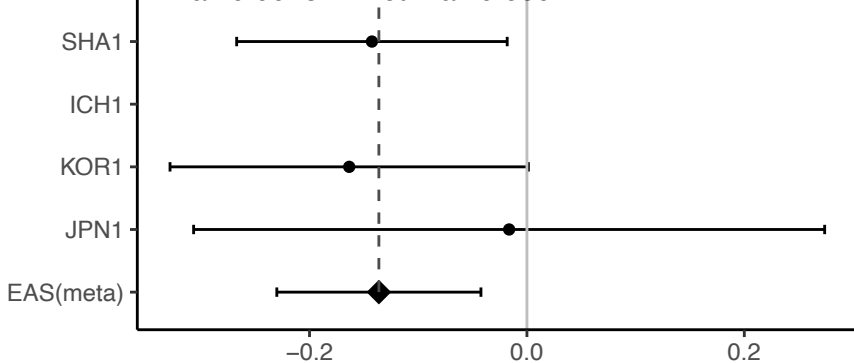

Pval: 3.48e-10 HetPval: 1.22e-01 logBF: 8

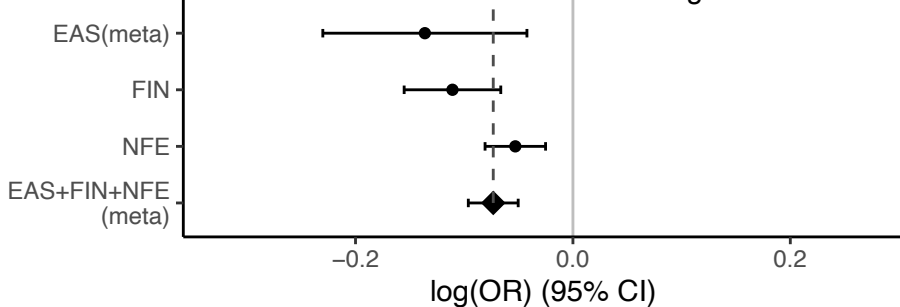

# IBD

chr17:59886176:A:G rs1292053 TUBD1

Reference allele: A Effect allele: G

Reported: NFE

Source: EUR+EAS

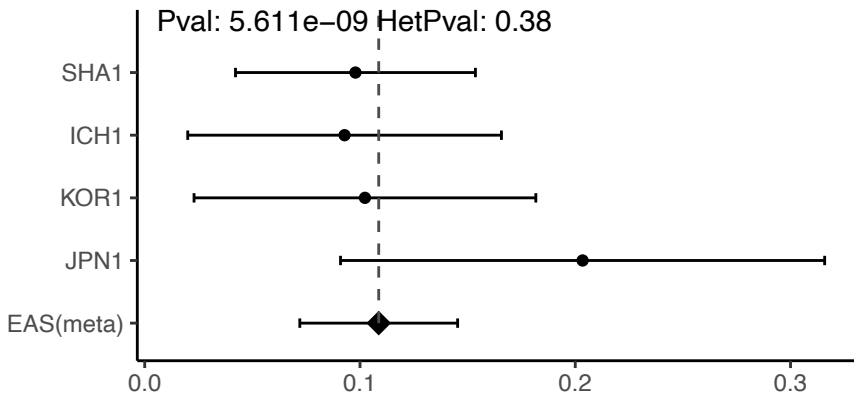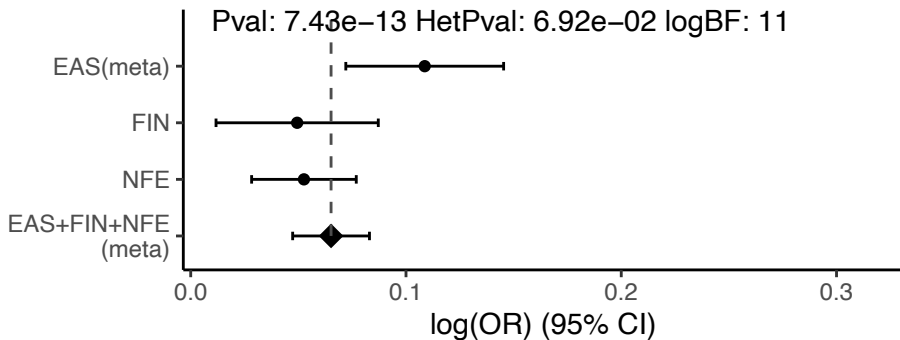

# IBD

chr17:62449865:G:A rs9904398 METTL2A

Reference allele: G Effect allele: A

Reported: NEW

Source: EUR+EAS

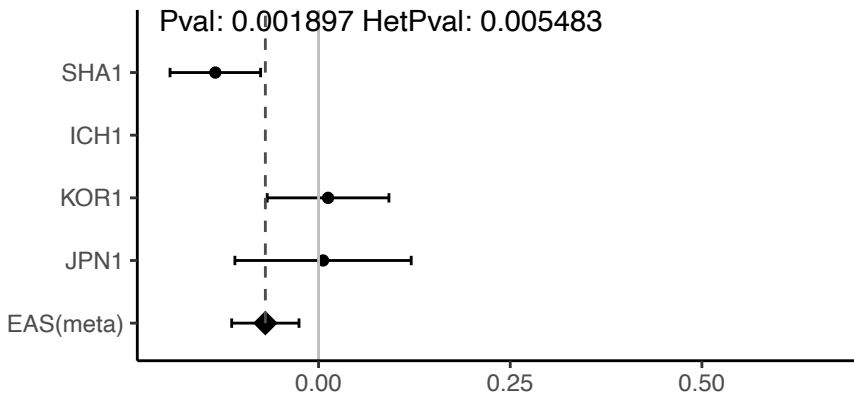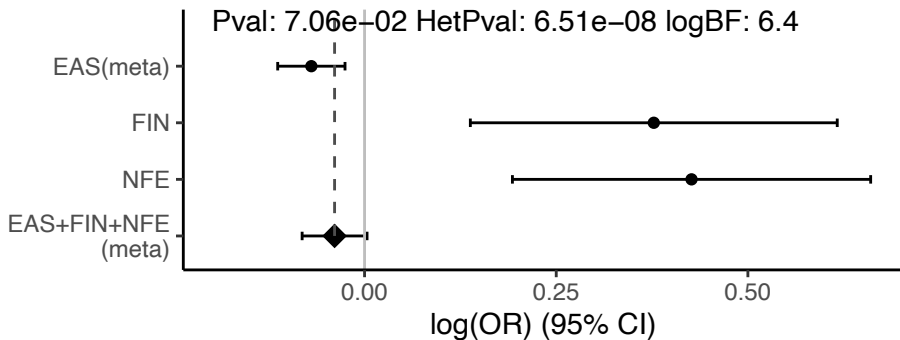



# IBD

chr17:72643045:G:A rs8072795 SLC39A11

Reference allele: G Effect allele: A

Reported: NFE

Source: EUR+EAS

Pval: 0.01421 HetPval: 0.07173

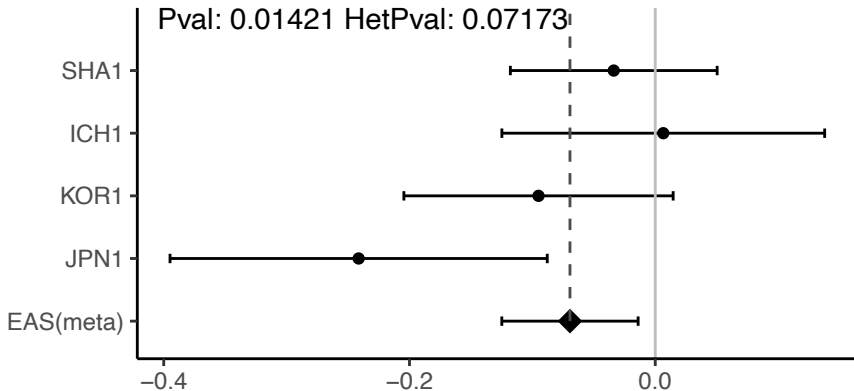

Pval: 2.74e-13 HetPval: 4.49e-02 logBF: 11

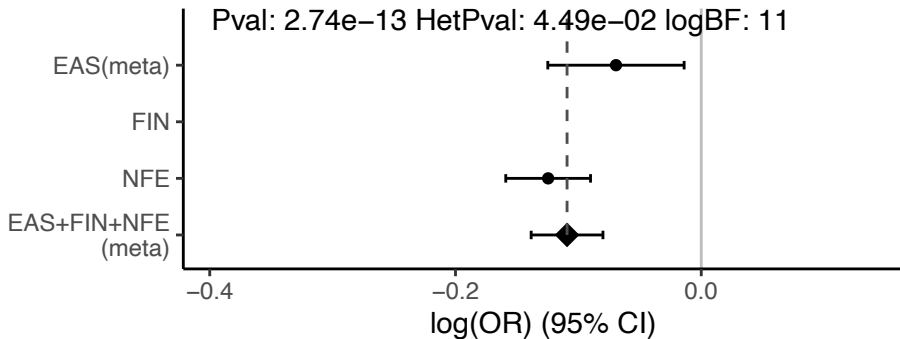

# IBD

chr18:2734945:C:G rs663411 SMCHD1

Reference allele: C Effect allele: G

Reported: NEW

Source: EUR+EAS

Pval: 0.1462 HetPval: 0.2451

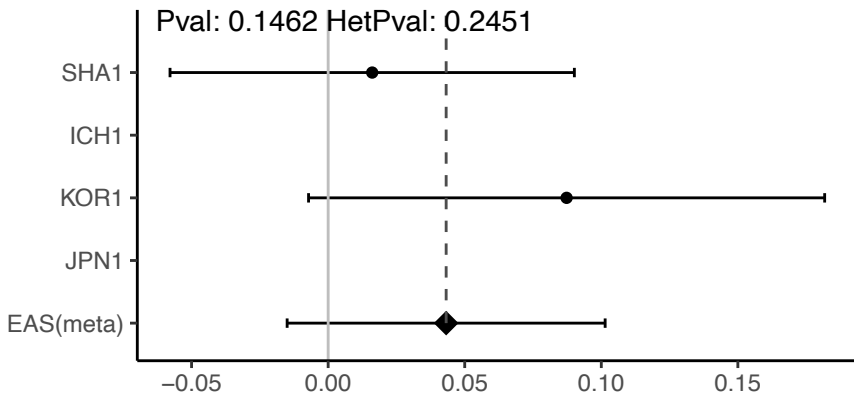

Pval: 1.78e-08 HetPval: 5.45e-01 logBF: 6.5

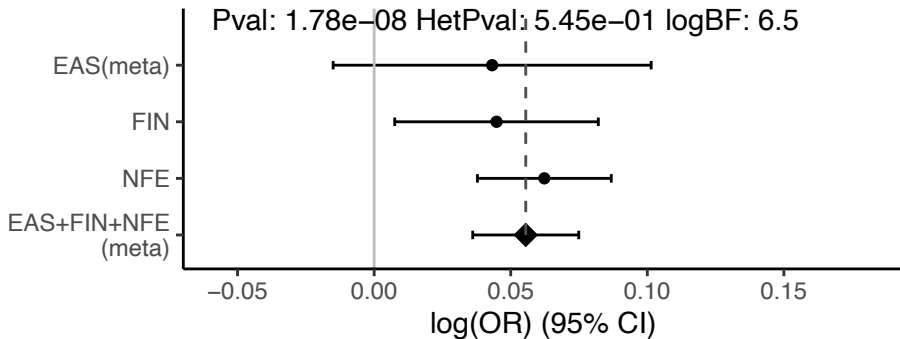

# IBD

chr18:12823057:G:T rs547268 PTPN2

Reference allele: G Effect allele: T

Reported: NFE

Source: EUR+EAS

Pval: 4.162e-08 HetPval: 0.9844

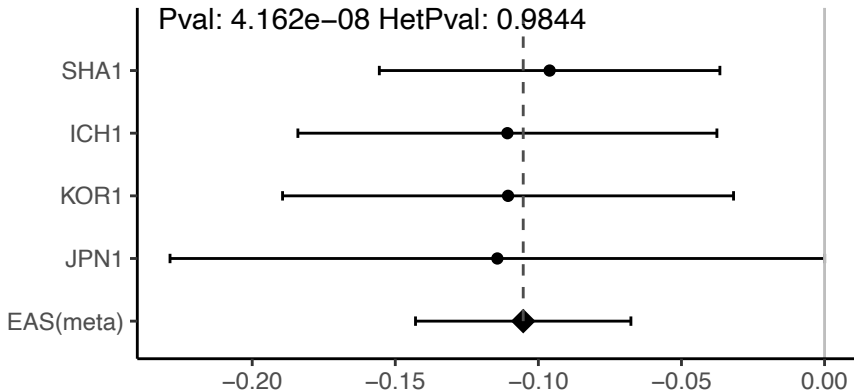

Pval: 1.91e-25 HetPval: 9.78e-01 logBF: 23

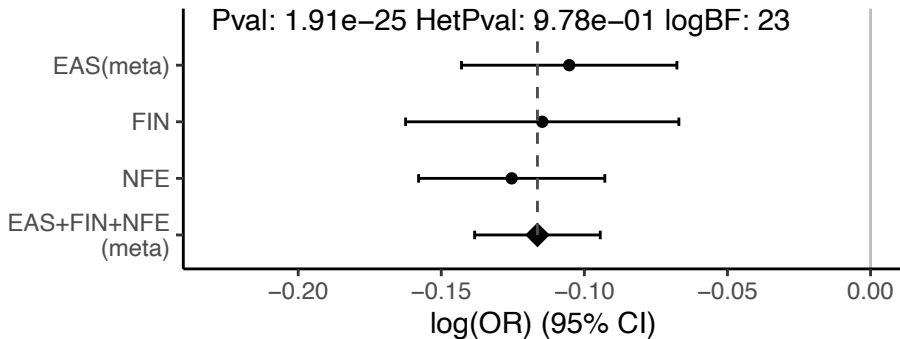

# IBD

chr18:48863700:C:CTTG rs138863186 CTIF

Reference allele: C Effect allele: CTTG

Reported: NFE

Source: EUR+EAS

Pval: - HetPval: -

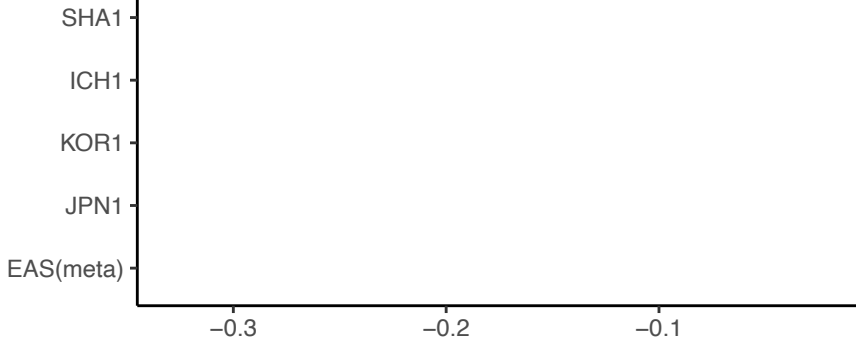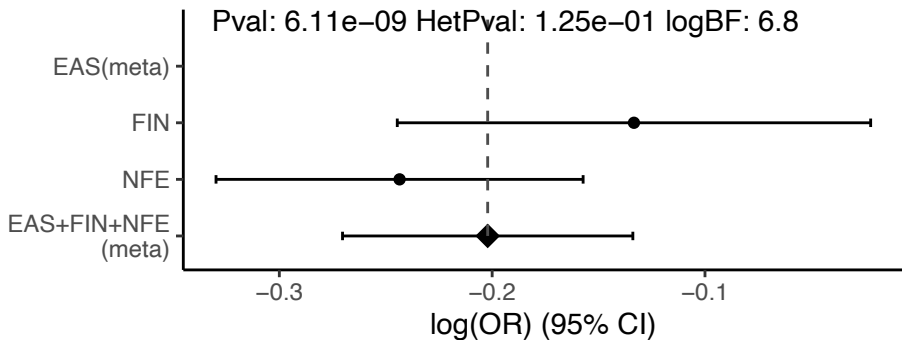

# IBD

chr18:50977537:G:A rs9635956 ELAC1

Reference allele: G Effect allele: A

Reported: NEW

Source: EUR+EAS

Pval: 0.0007096 HetPval: 0.4789

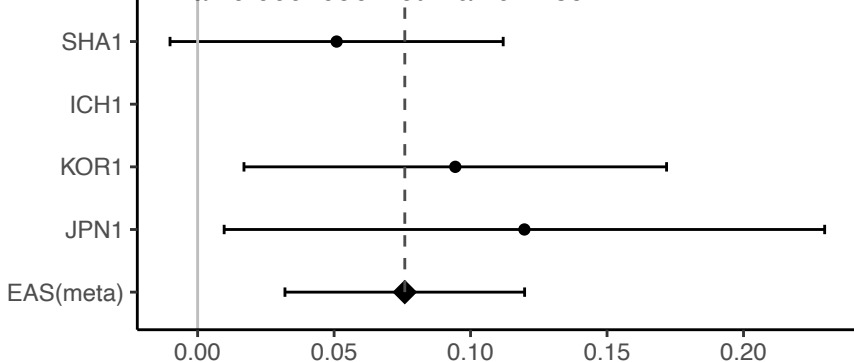

Pval: 1.61e-08 HetPval: 5.97e-01 logBF: 6.5

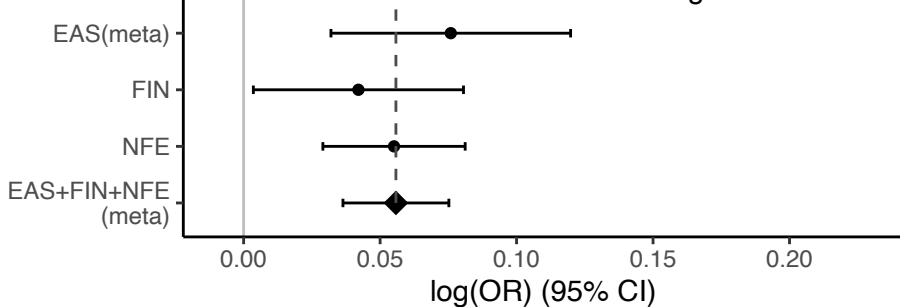

# IBD

chr19:1109216:G:A rs11669443 SBNO2

Reference allele: G Effect allele: A

Reported: NFE

Source: EUR+EAS

Pval: 6.895e-06 HetPval: 0.1361

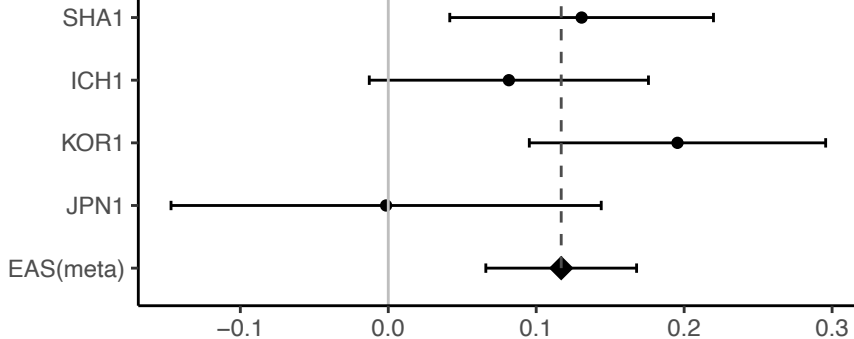

Pval: 9.96e-21 HetPval: 8.3e-02 logBF: 19

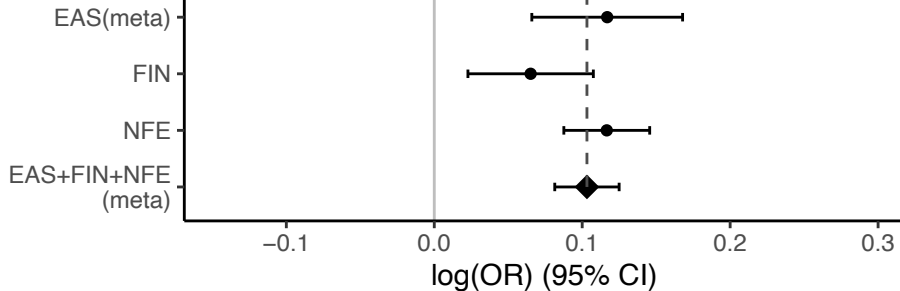

# IBD

chr19:10359299:A:C rs12720356 TYK2

Reference allele: A Effect allele: C

Reported: NFE

Source: EUR+EAS

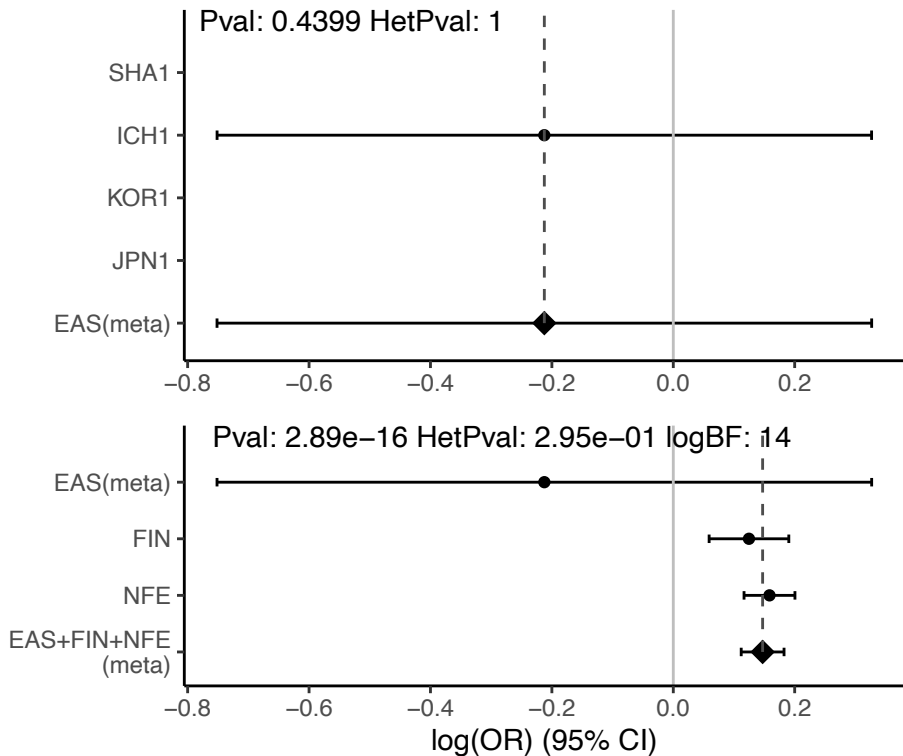

# IBD

chr19:33260220:T:TC rs138636798 SLC7A10

Reference allele: T Effect allele: TC

Reported: NFE

Source: EUR+EAS

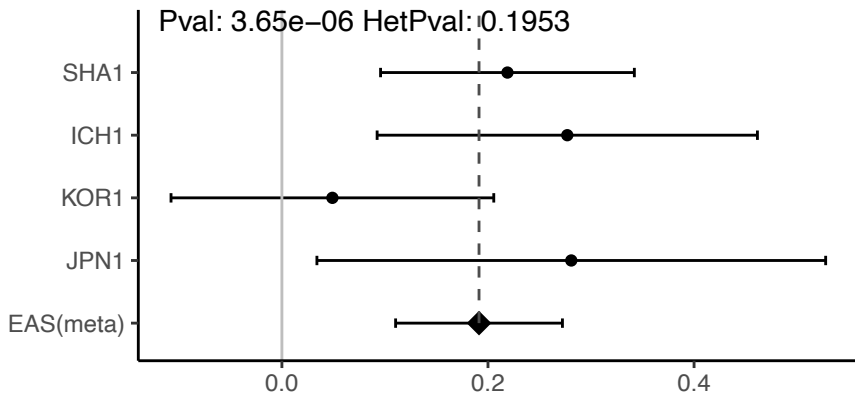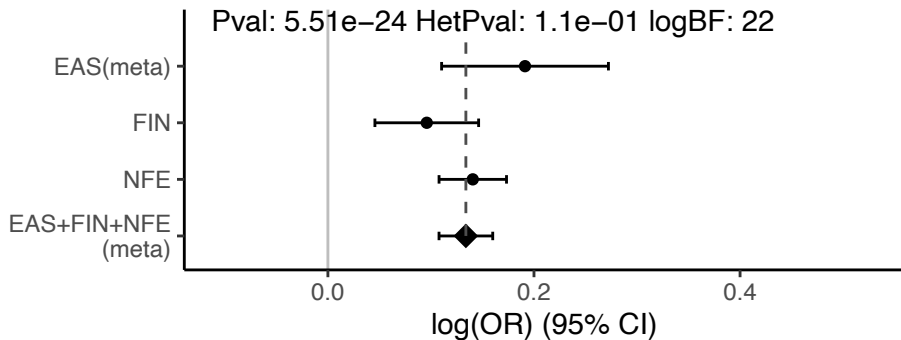



# IBD

chr19:40712706:G:A rs2604913 COQ8B

Reference allele: G Effect allele: A

Reported: NEW

Source: EUR+EAS

Pval: 0.004644 HetPval: 0.3833

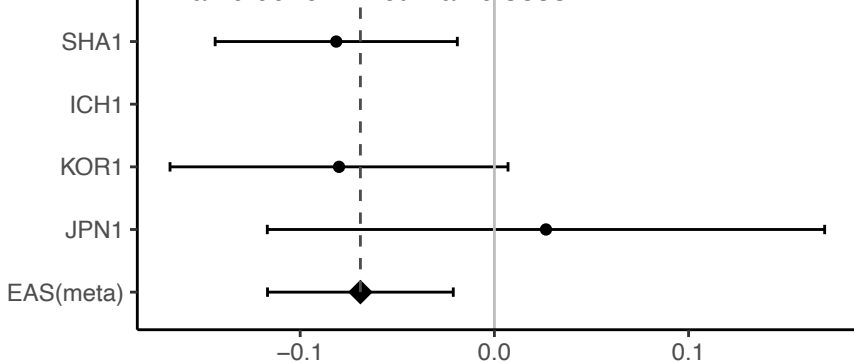

Pval: 3.69e-10 HetPval: 5.85e-01 logBF: 7.8

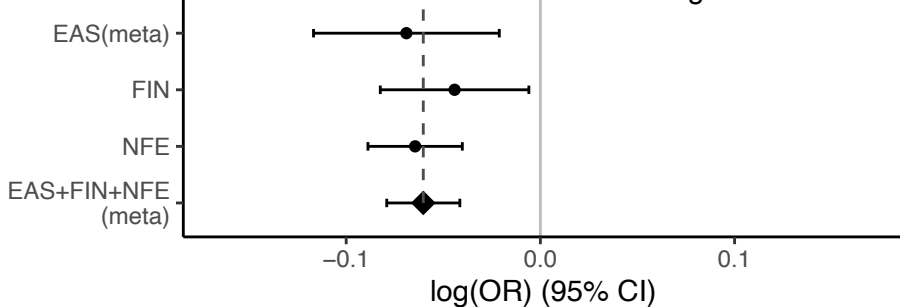

# IBD

chr20:6113242:T:G rs4256018 FERMT1

Reference allele: T Effect allele: G

Reported: NFE

Source: EUR+EAS

Pval: 0.007123 HetPval: 0.8584

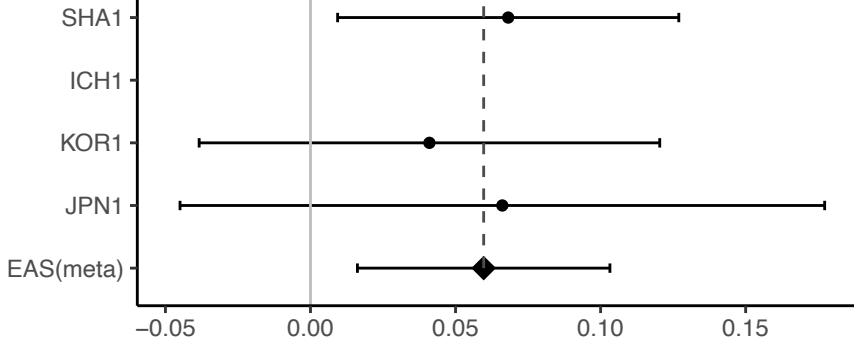

Pval: 1.86e-08 HetPval: 7.96e-02 logBF: 6.2

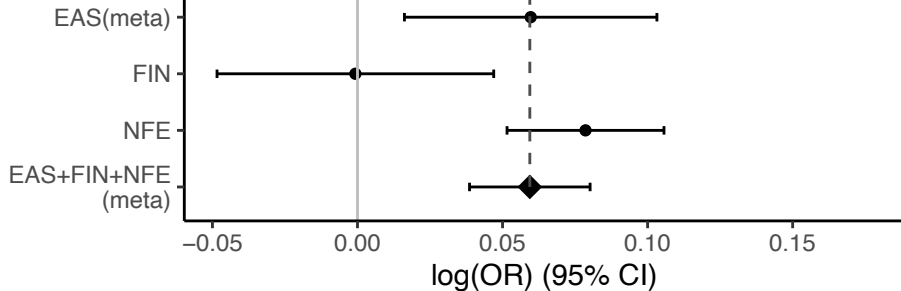

# IBD

chr20:32503432:T:C rs875519 NOL4L

Reference allele: T Effect allele: C

Reported: NFE

Source: EUR+EAS

Pval: 0.1126 HetPval: 0.7608

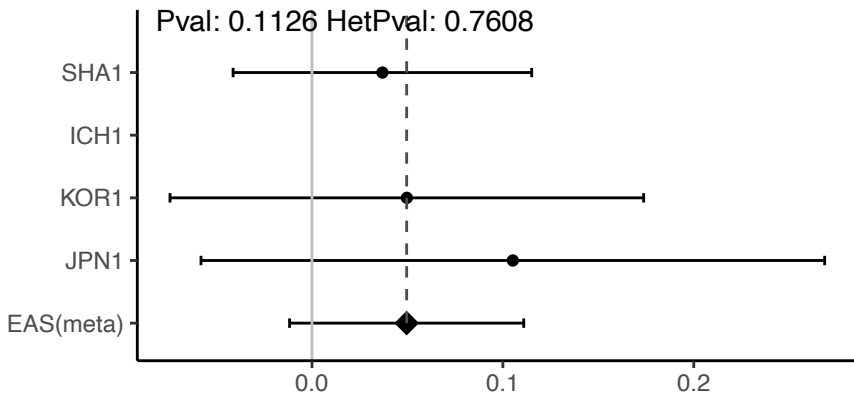

Pval:  $2.37e-10$  HetPval:  $8.16e-01$  logBF: 8.3

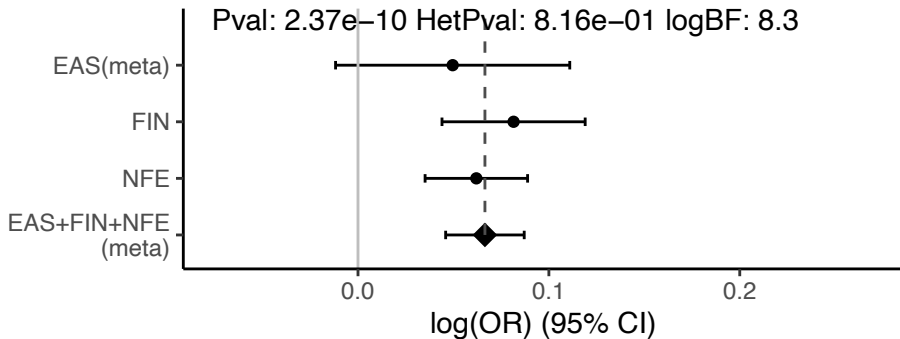

# IBD

chr20:40169106:T:G rs6071961 AL009050.1

Reference allele: T Effect allele: G

Reported: NEW

Source: EUR+EAS

Pval: - HetPval: -

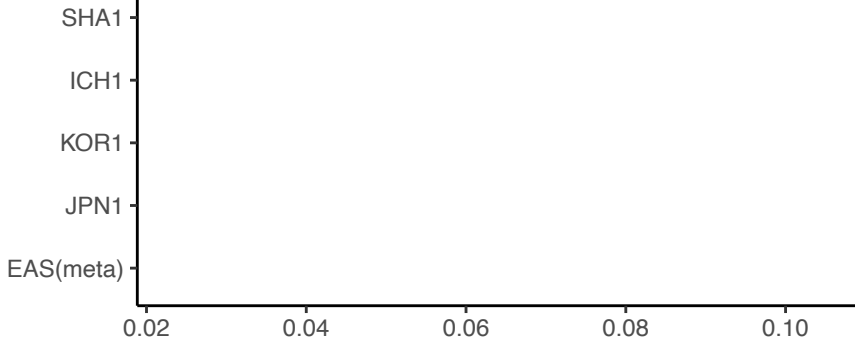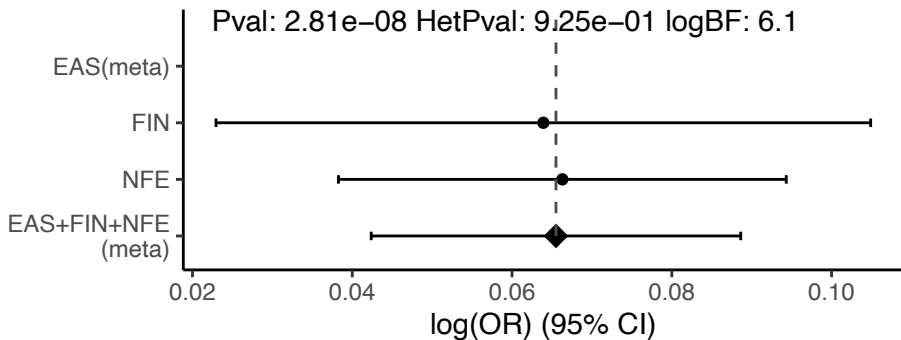

# IBD

chr20:41301389:T:G rs17181845 ZHX3

Reference allele: T Effect allele: G

Reported: NEW

Source: EUR+EAS

Pval: 0.8479 HetPval: 0.9777

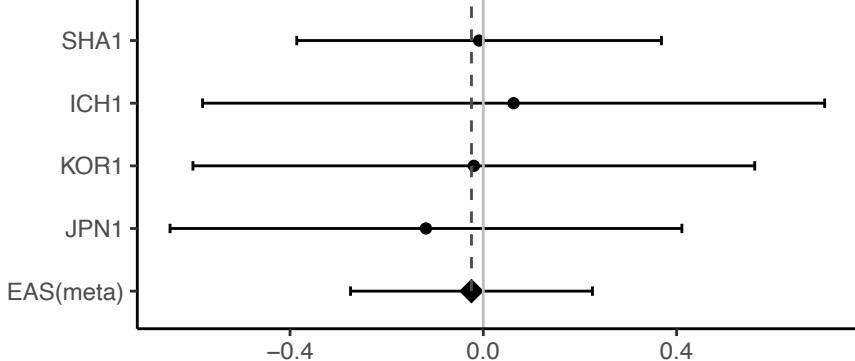

Pval: 1.95e-08 HetPval: 9.01e-01 logBF: 6.4

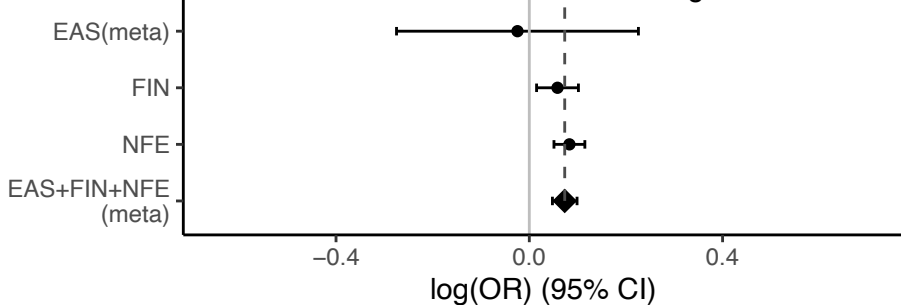

# IBD

chr20:50338887:T:C rs913678 LINC01271

Reference allele: T Effect allele: C

Reported: NFE

Source: EUR+EAS

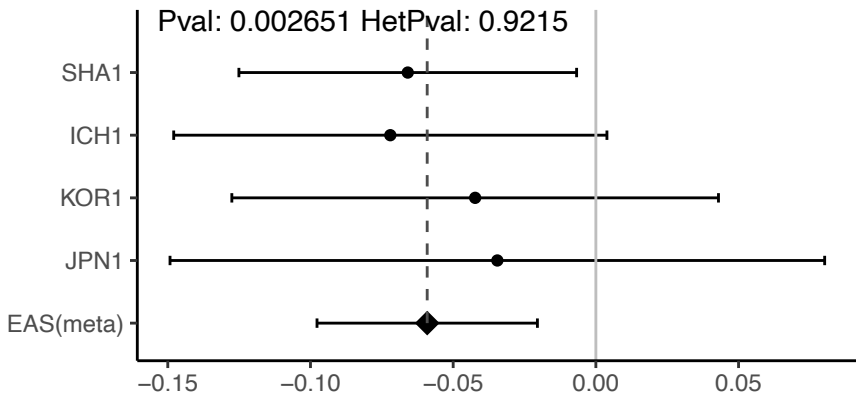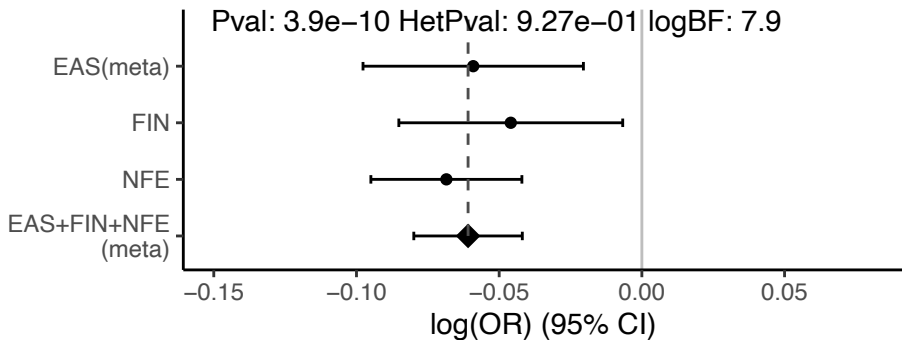

# IBD

chr20:59249254:A:G rs259964 ZNF831

Reference allele: A Effect allele: G

Reported: NFE

Source: EUR+EAS

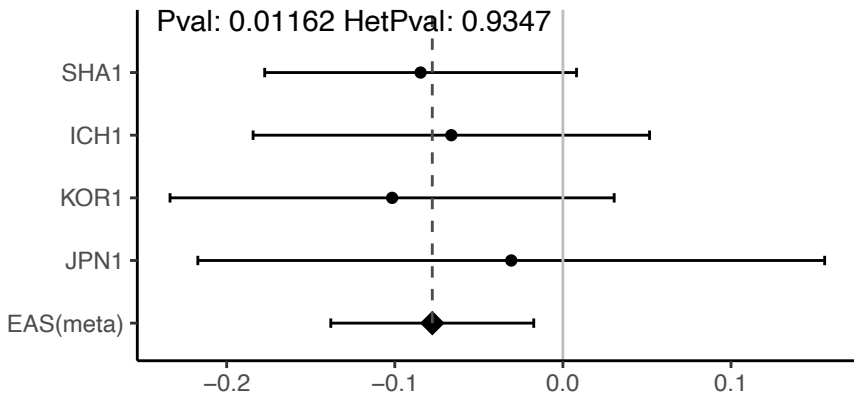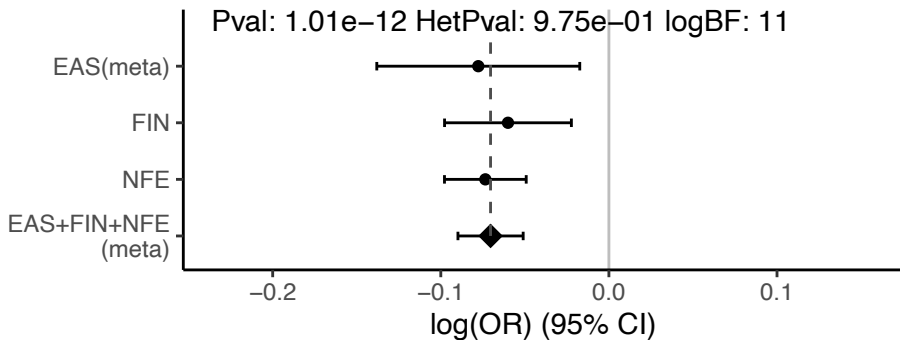

# IBD

chr20:63697746:G:A rs6062496 TNFRSF6B

Reference allele: G Effect allele: A

Reported: NFE,EAS

Source: EUR+EAS

Pval:  $8.642e-15$  HetPval: 0.4399

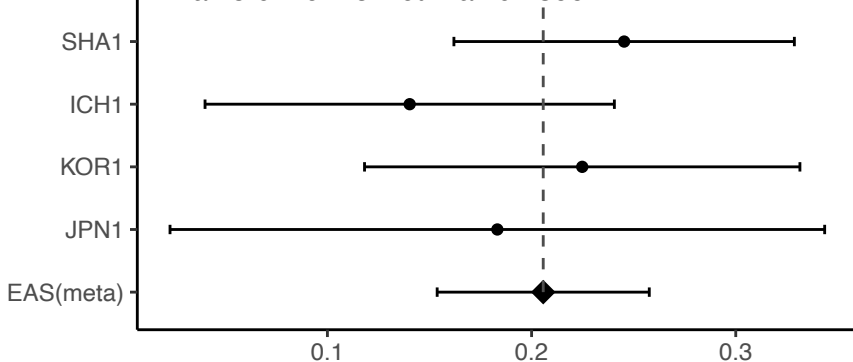

Pval:  $2.26e-44$  HetPval:  $5.24e-02$  logBF: 42

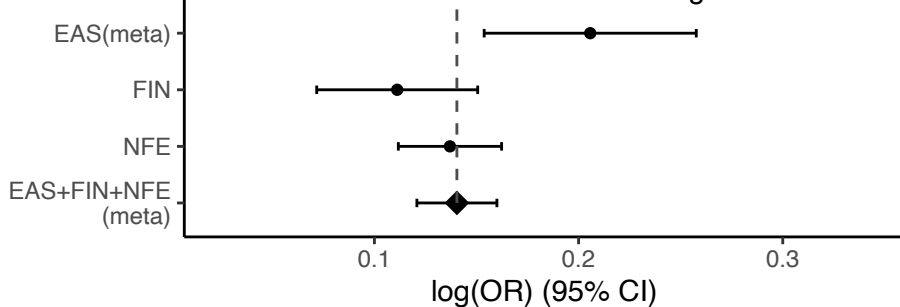



# IBD

chr21:15448734:C:T rs7277261 CYCSP42

Reference allele: C Effect allele: T

Reported: NFE

Source: EUR+EAS

Pval:  $1.274e-14$  HetPval: 0.9992

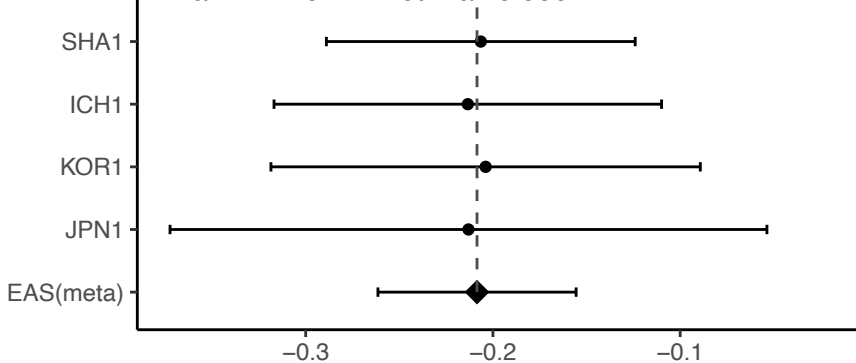

Pval:  $7.03e-40$  HetPval:  $3.35e-03$  logBF: 38

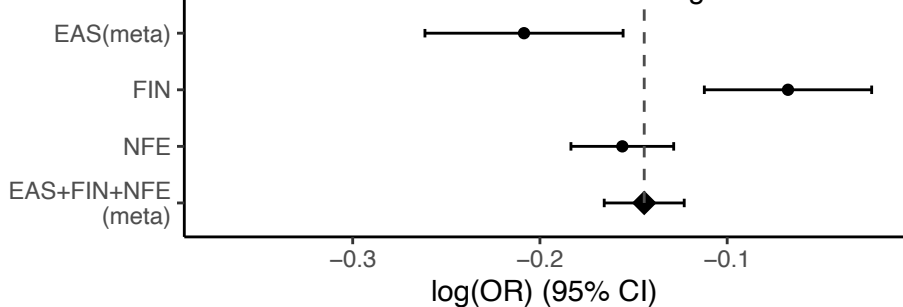

# IBD

chr21:39094644:G:A rs2836882 PSMG1

Reference allele: G Effect allele: A

Reported: NFE

Source: EUR+EAS

Pval:  $6.88e-06$  HetPval: 0.0436

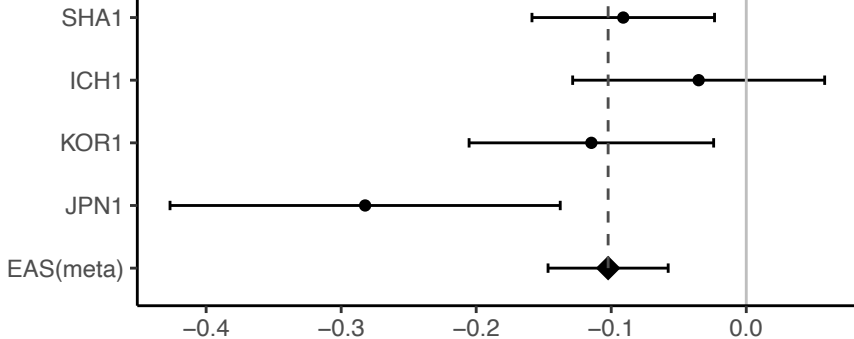

Pval:  $4.85e-40$  HetPval:  $1.75e-02$  logBF: 38

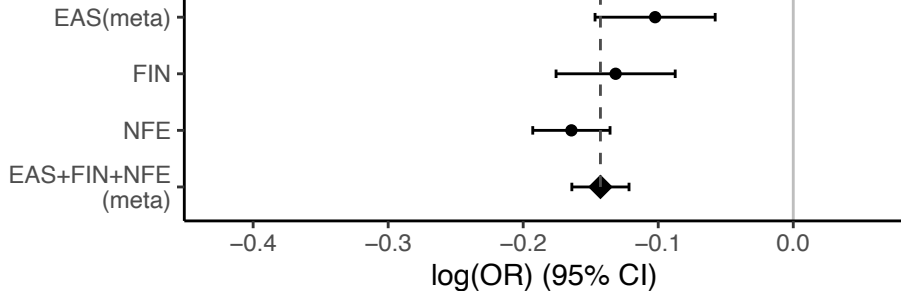

# IBD

chr21:44057275:A:G rs13047030 TRAPPC10

Reference allele: A Effect allele: G

Reported: NFE

Source: EUR+EAS

Pval: 2.691e-05 HetPval: 0.1762

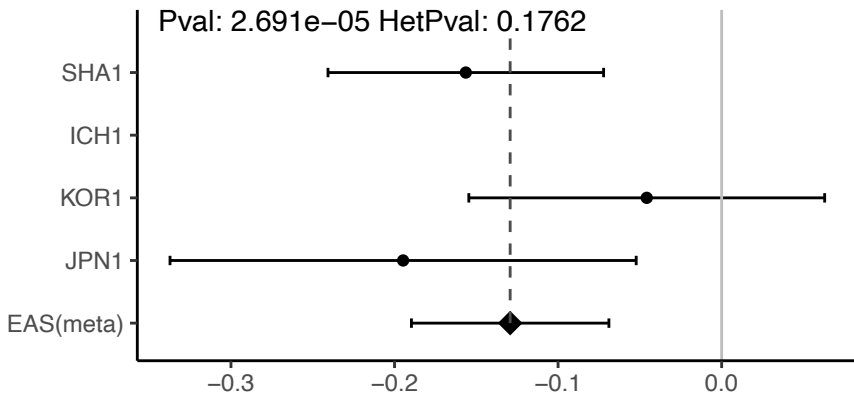

Pval: 9.17e-10 HetPval: 1.38e-01 logBF: 7.7

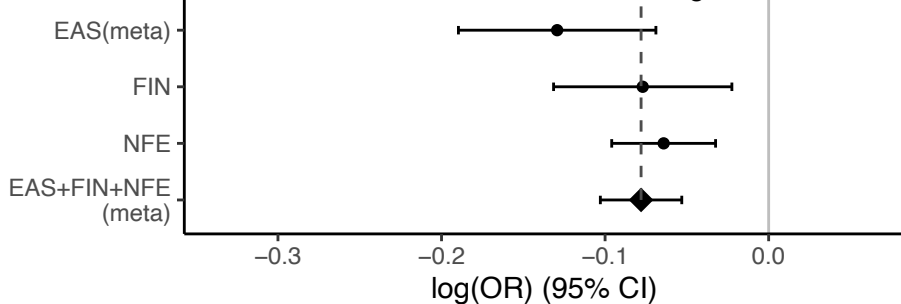

# IBD

chr22:21625295:C:T rs12158299 UBE2L3

Reference allele: C Effect allele: T

Reported: NFE

Source: EUR+EAS

Pval:  $4.086e-14$  HetPval: 0.2492

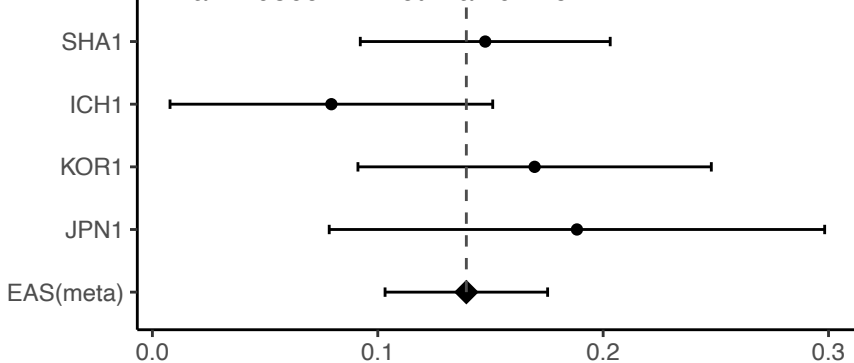

Pval:  $2.99e-27$  HetPval:  $1.78e-02$  logBF: 25

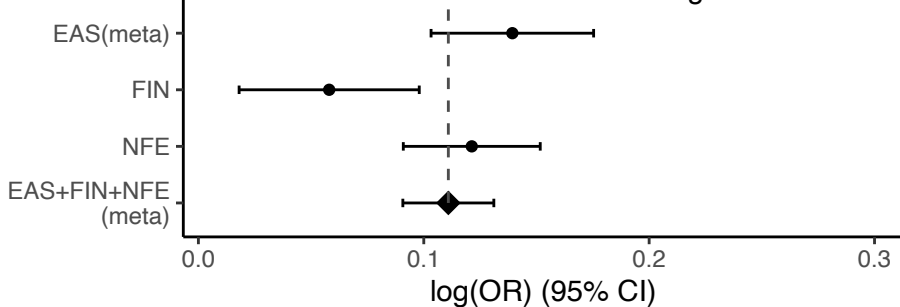

# IBD

chr22:26641724:G:C rs5761654 CRYBA4

Reference allele: G Effect allele: C

Reported: NEW

Source: EUR+EAS

Pval: 0.1967 HetPval: 0.2145

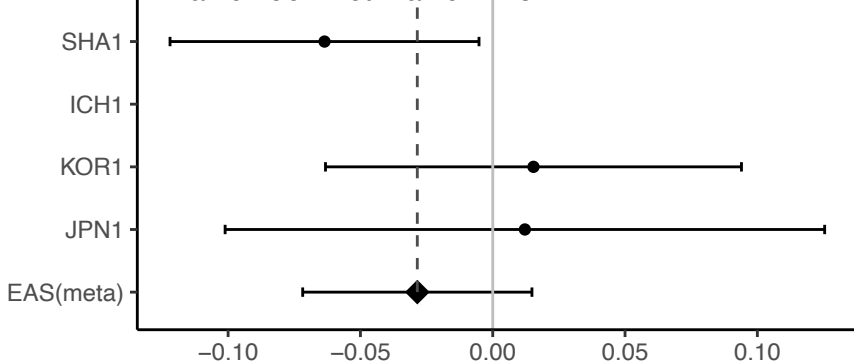

Pval: 3.55e-08 HetPval: 3.18e-01 logBF: 6.2

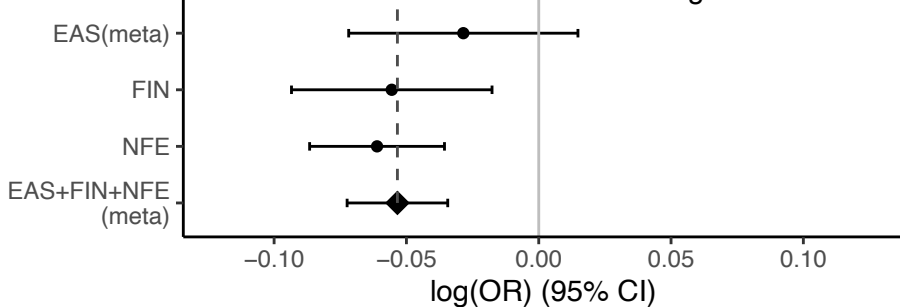

# IBD

chr22:30174033:A:G rs1003342 HORMAD2

Reference allele: A Effect allele: G

Reported: NFE

Source: EUR+EAS

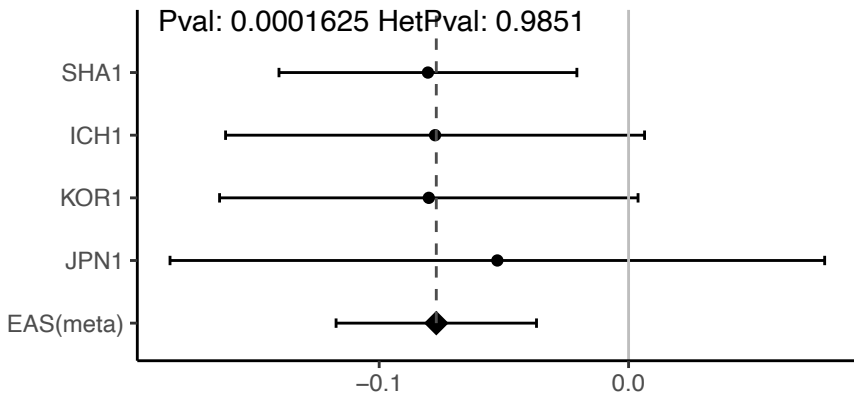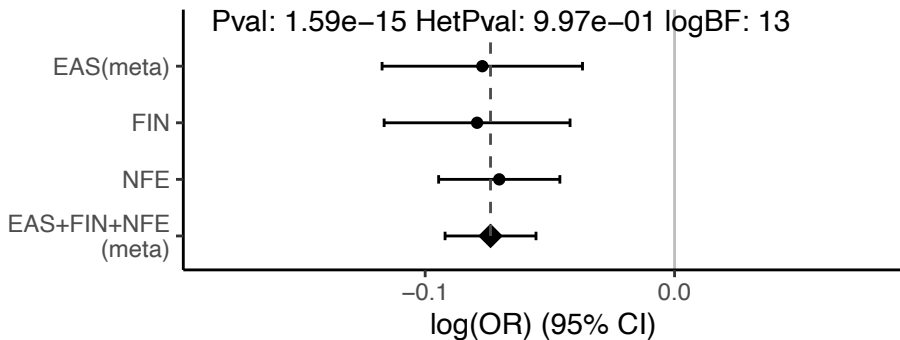

# IBD

chr22:39266475:T:C rs9611131 PDGFB

Reference allele: T Effect allele: C

Reported: NFE

Source: EUR+EAS

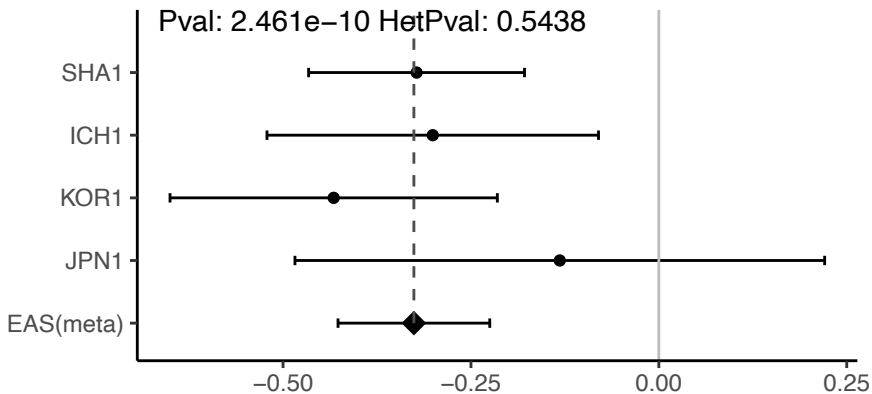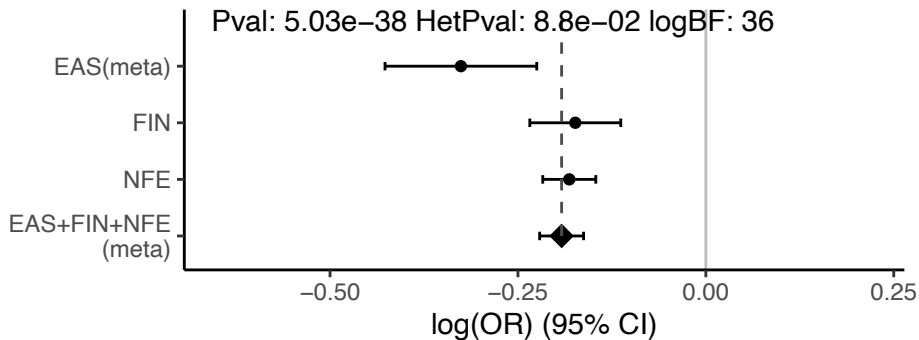

# IBD

chrX:136581905:C:T rs2427870 VGLL1

Reference allele: C Effect allele: T

Reported: EAS

Source: EUR+EAS

Pval: - HetPval: -

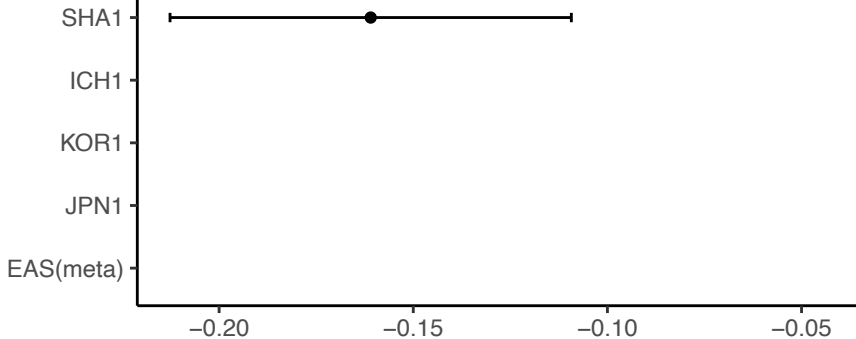

Pval:  $5.67e-13$  HetPval:  $5.23e-03$  |logBF: 11

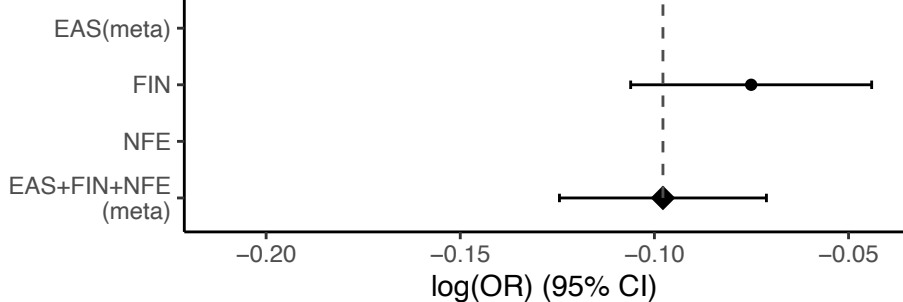

Supplement: NIHMS1903722-supplement-SD_3.pdf [file NIHMS1903722-supplement-SD_3.pdf]
