# Supplementary material
Source: PubMed Central journal article supplement (PMC10290755)

**Supplementary Data 4. Forest plot for putative causal variants identified in EAS and in EUR.** All variants from the heterogeneity test between EAS and EUR (Figure 3c and Supplementary Table 12) were included. The title of each page shows the disease subtype, the putative causal variant, the nearest gene to the variant, and the source of the causal variant. HetPval: original P-value from the heterogeneous test between EAS (meta) and NFE (Cochrane's Q test, two-sided). \*: significant after Bonferroni correction with the number of putative causal variants tested (HetPval < 0.05 / 25 for CD and HetPval < 0.05 / 16 for UC). OR: Odds ratio. Data are presented as mean value  $\pm$  95% confidence interval (Error bar).

# CD Source: EUR

IL10 rs3024493 chr1:206770623:C:A

Reference allele: C Effect allele: A

HetPval: 4.63e-01

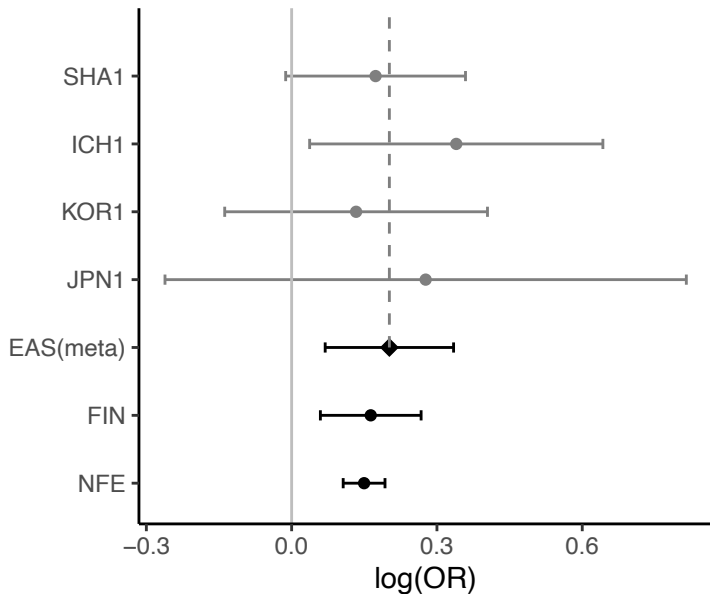

# CD Source: EAS&NFE

IL23R rs76418789 chr1:67182913:G:A

Reference allele: G Effect allele: A

HetPval: 2.01e-03

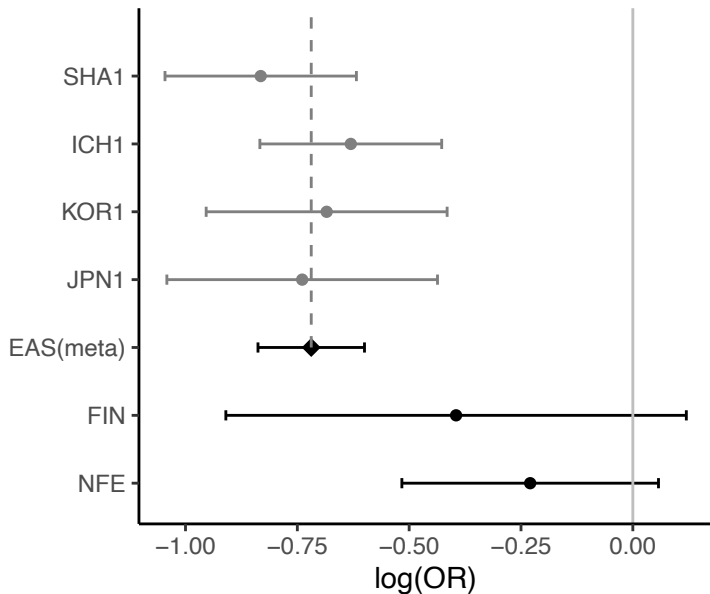

# CD Source: EUR

IL23R rs2019262 chr1:67214307:G:A

Reference allele: G Effect allele: A

HetPval:  $2.43e-03$

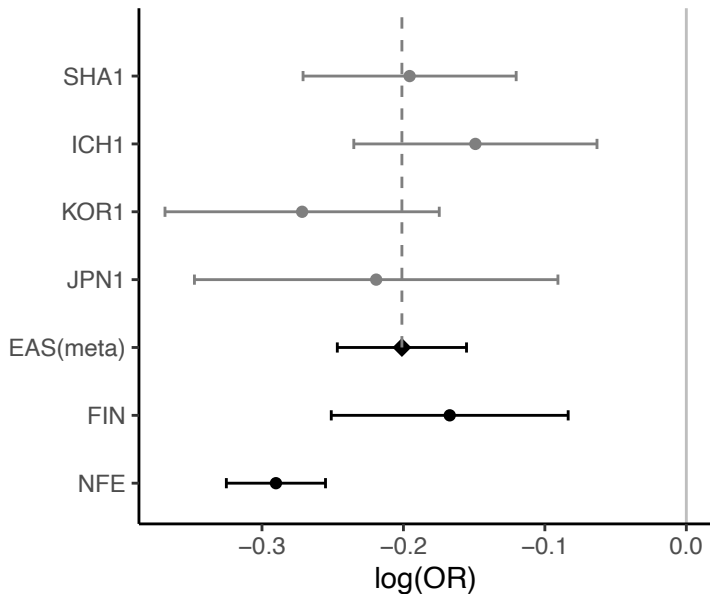

# CD Source: EAS

DUSP5 rs11195128 chr10:110426390:C:T

Reference allele: C Effect allele: T

HetPval:  $1.39e-05^*$

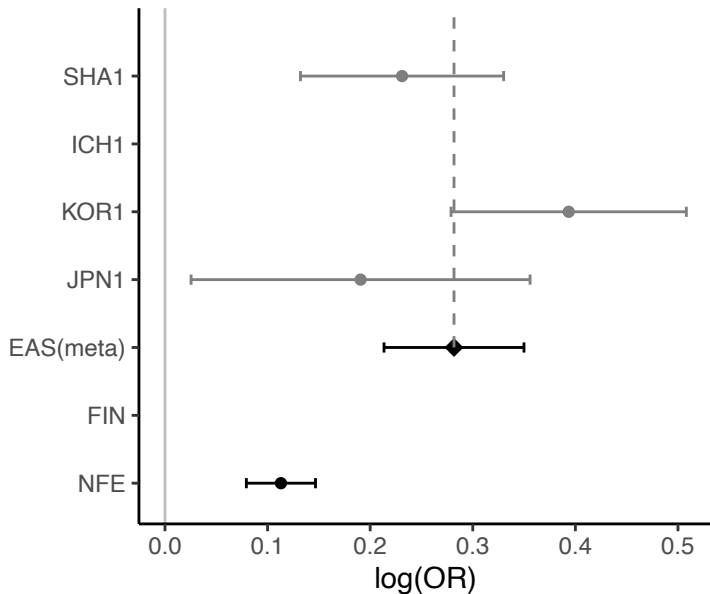

# CD Source: EUR

AC067752.1 rs7915475 chr10:62621908:A:G

Reference allele: A Effect allele: G

HetPval:  $1.4e-03^*$

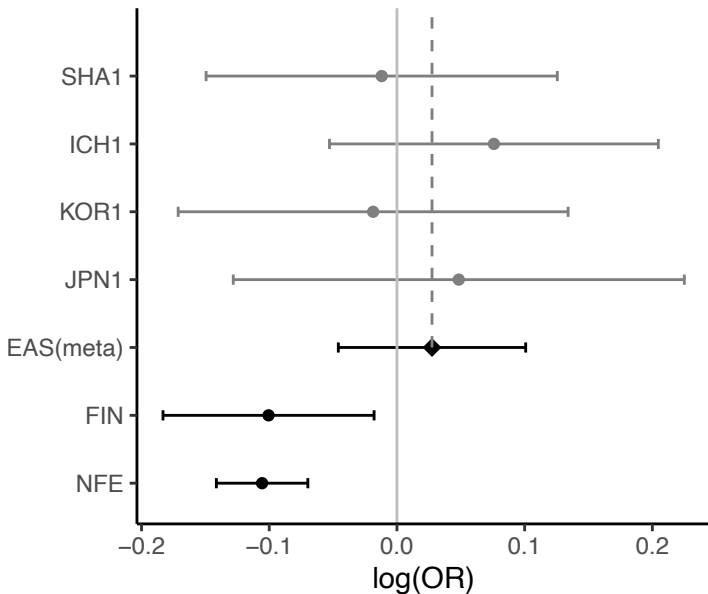

# CD Source: EAS

ADO rs224136 chr10:62710915:C:T

Reference allele: C Effect allele: T

HetPval:  $7.87e-03$

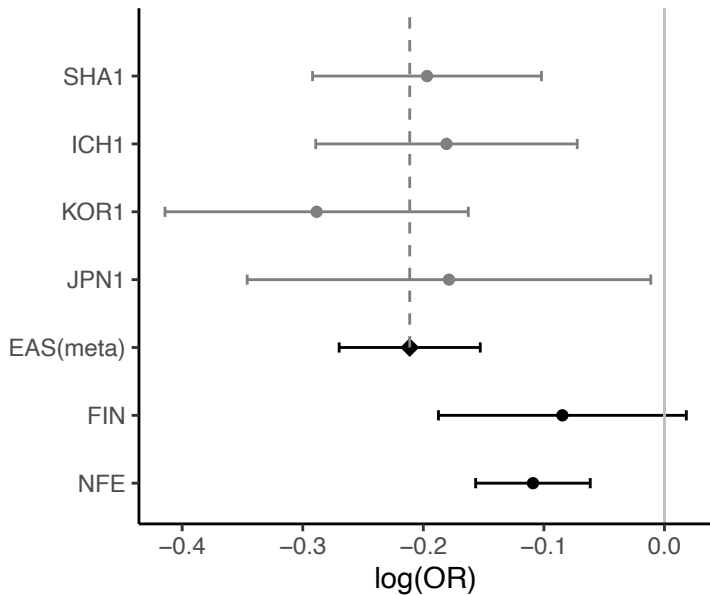

# CD Source: EAS

ZMIZ1 rs1250566 chr10:79286696:G:A

Reference allele: G Effect allele: A

HetPval: 8.44e-02

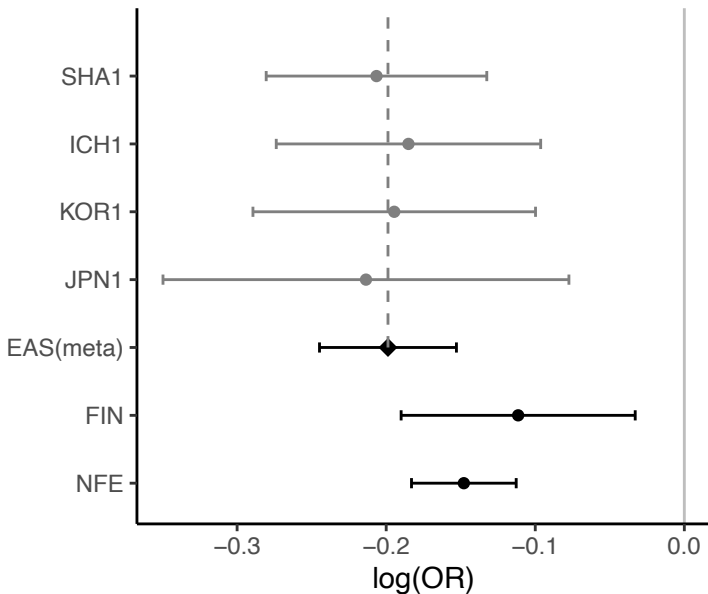



# CD Source: EUR

NKX2-3 rs10748781 chr10:99523573:C:A

Reference allele: C Effect allele: A

HetPval:  $8.6e-02$

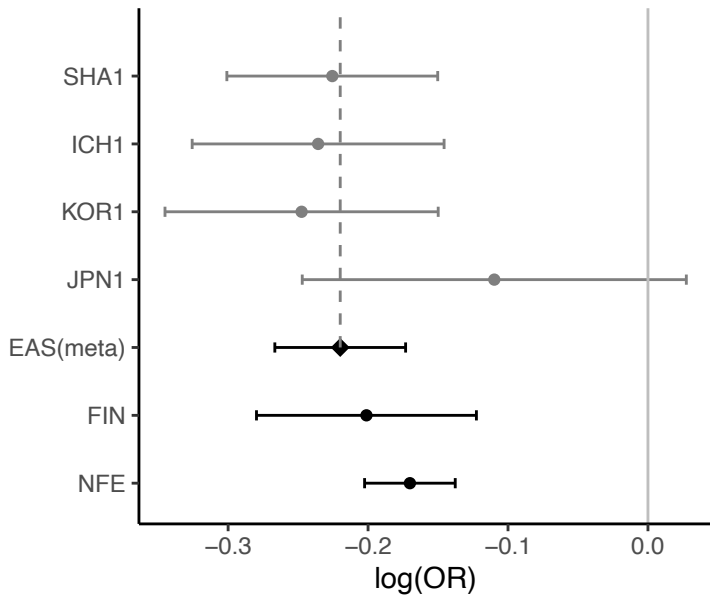

CD Source: EUR

CXCR5 rs630923 chr11:118883644:C:A

Reference allele: C Effect allele: A

HetPval:  $9.51e-01$

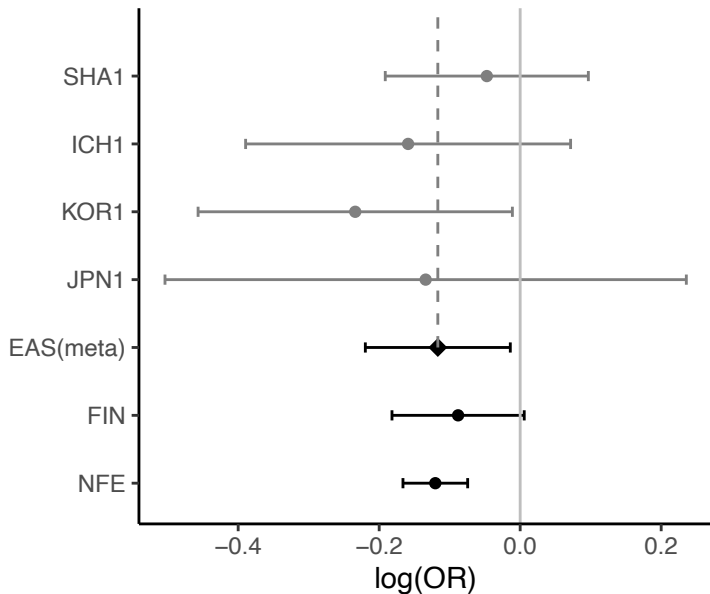

# CD Source: EUR

LRRK2 rs7307562 chr12:40331158:G:T

Reference allele: G Effect allele: T

HetPval:  $1.93e-03^*$

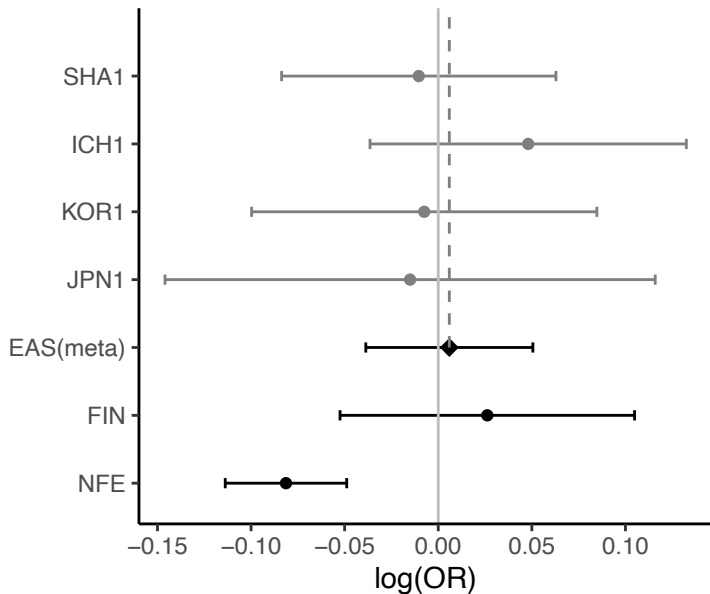

# CD Source: EAS

FOS rs1569328 chr14:75275048:C:T

Reference allele: C Effect allele: T

HetPval:  $1.56e-01$

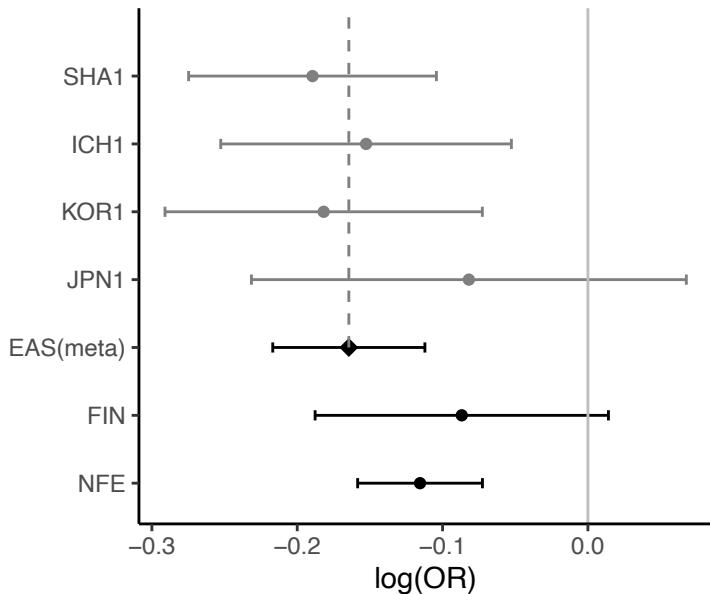

# CD Source: EUR

CCL2 rs9889296 chr17:34243528:G:A

Reference allele: G Effect allele: A

HetPval:  $4.96e-05^*$

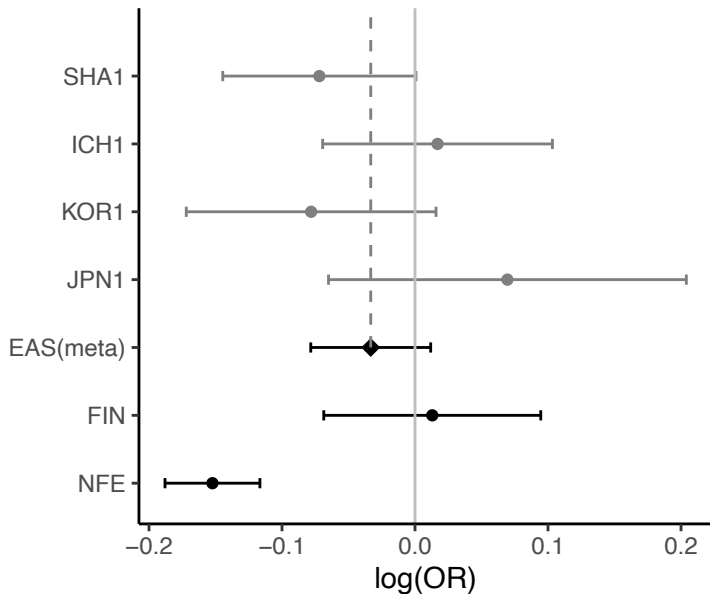

# CD Source: EAS

MFSD12 rs2240751 chr19:3548233:A:G

Reference allele: A Effect allele: G

HetPval:  $2e-01$

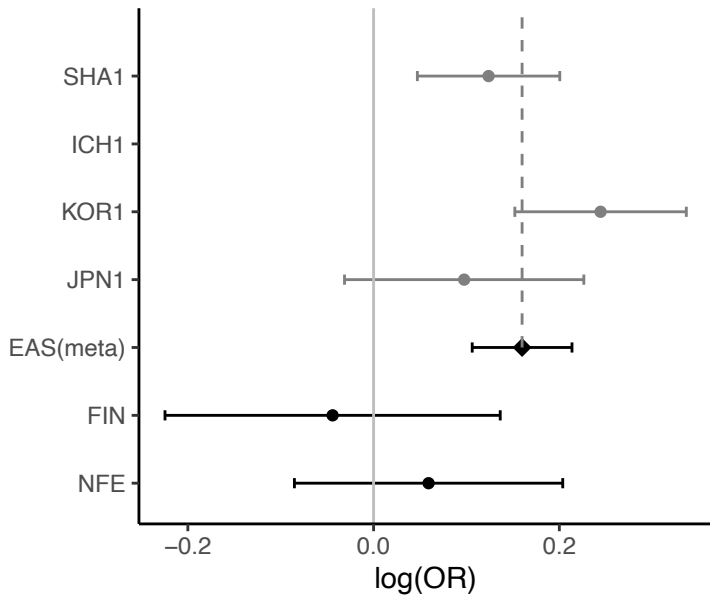

# CD Source: EAS

CCL20 rs7556897 chr2:227795396:C:T

Reference allele: C Effect allele: T

HetPval:  $1.08e-05^*$

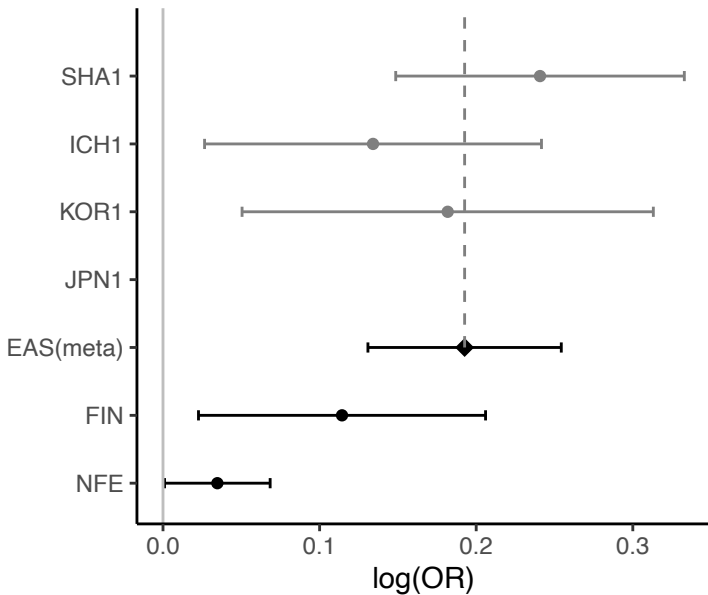

# CD Source: EUR

TNFRSF6B rs6062496 chr20:63697746:G:A

Reference allele: G Effect allele: A

HetPval: 2.73e-01

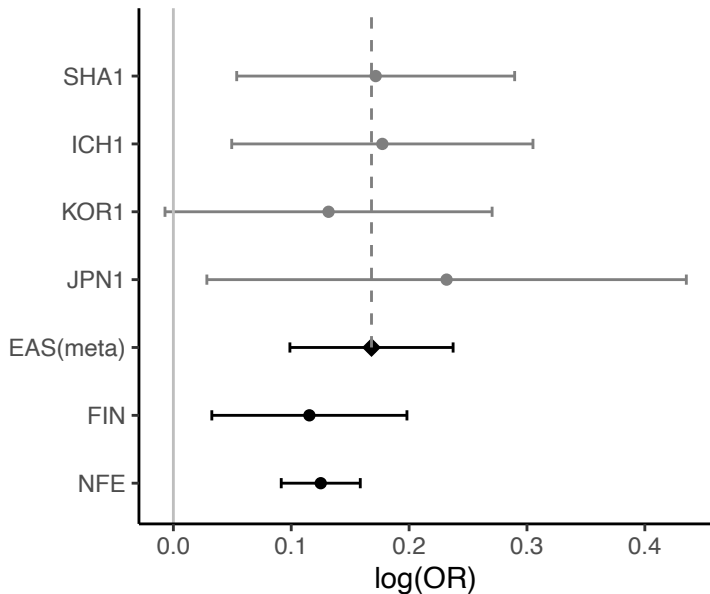



# CD Source: EAS

ZBTB46 rs2427537 chr20:63744874:T:C

Reference allele: T Effect allele: C

HetPval:  $5.38e-05^*$

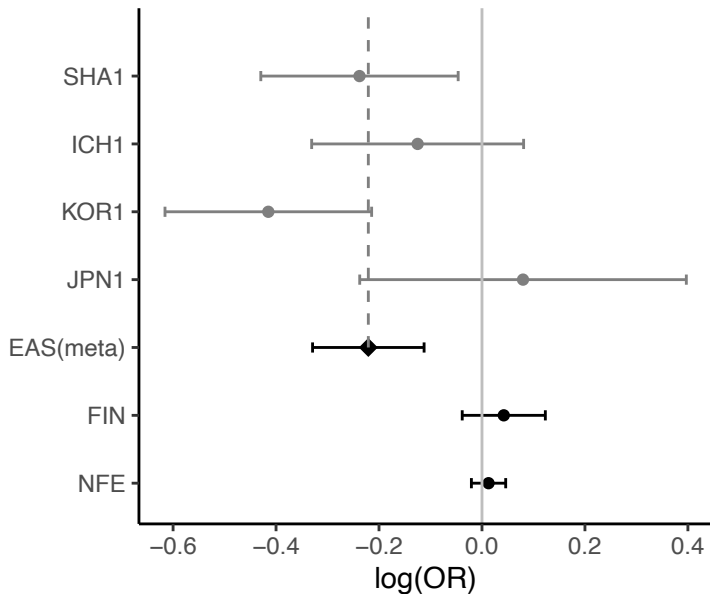

CD Source: EUR

CYCSP42 rs1736137 chr21:15434376:A:G

Reference allele: A Effect allele: G

HetPval: 8.68e-01

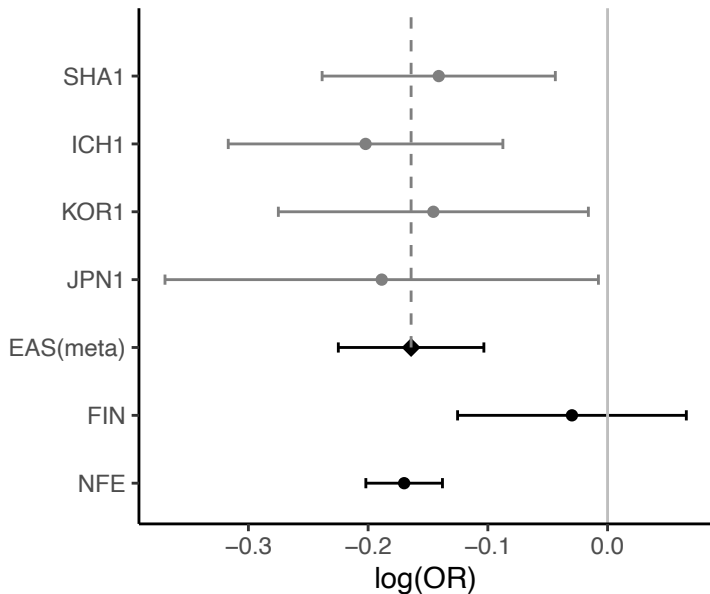

# CD Source: EAS

CSF2RB rs12628495 chr22:36911669:C:T

Reference allele: C Effect allele: T

HetPval:  $9.03e-16^*$

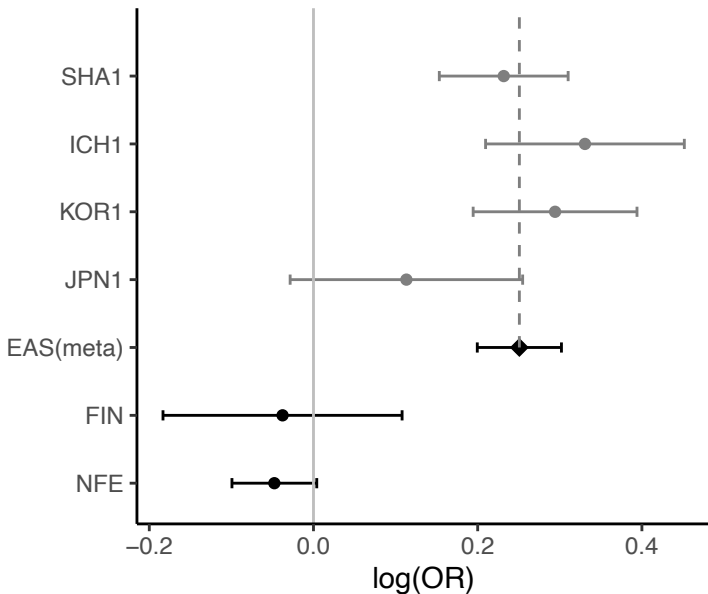

CD Source: EUR

PDGFB rs2143178 chr22:39264824:T:C

Reference allele: T Effect allele: C

HetPval: 5.41e-01

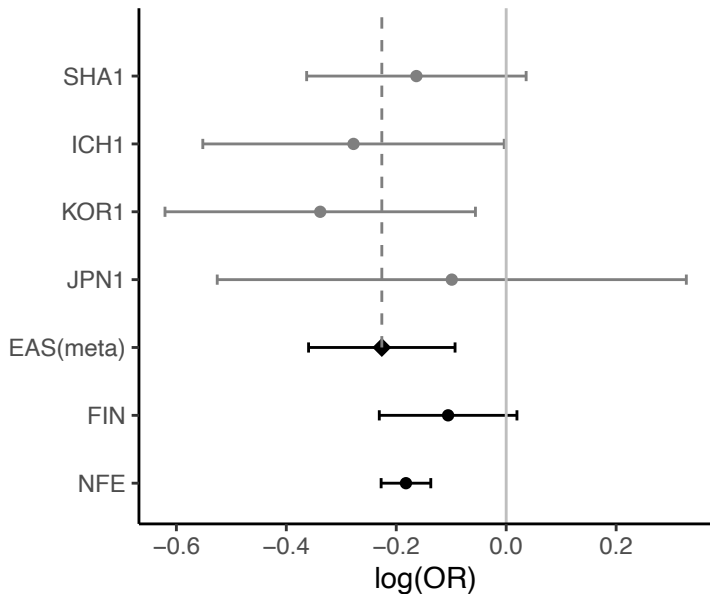

# CD Source: EAS

LINC02513 rs6856616 chr4:38323415:T:C

Reference allele: T Effect allele: C

HetPval:  $1.83e-05^*$

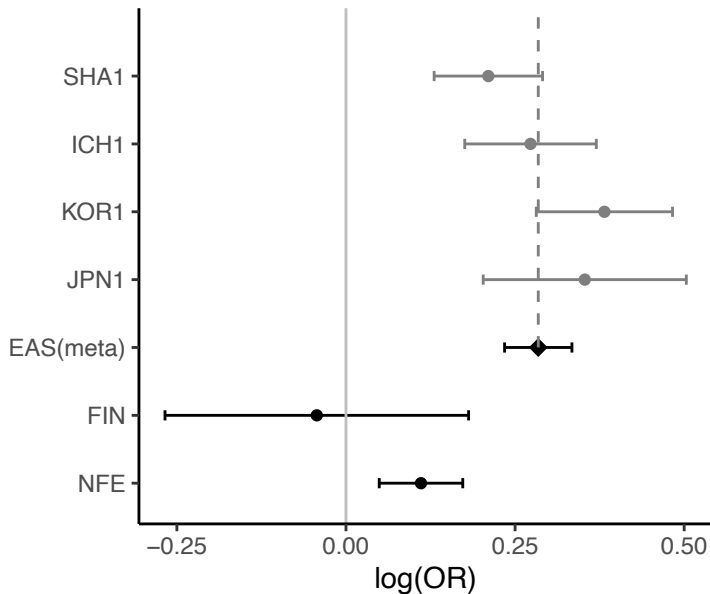

# CD Source: EAS&NFE

IL12B rs56167332 chr5:159400761:C:A

Reference allele: C Effect allele: A

HetPval: 5.16e-03

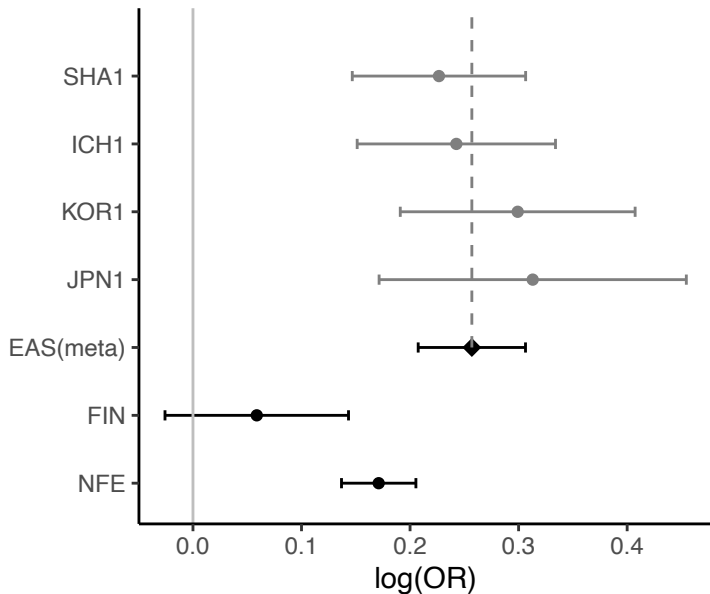

# CD Source: EAS

GTF2I rs117026326 chr7:74711703:C:T

Reference allele: C Effect allele: T

HetPval: 1.54e-02

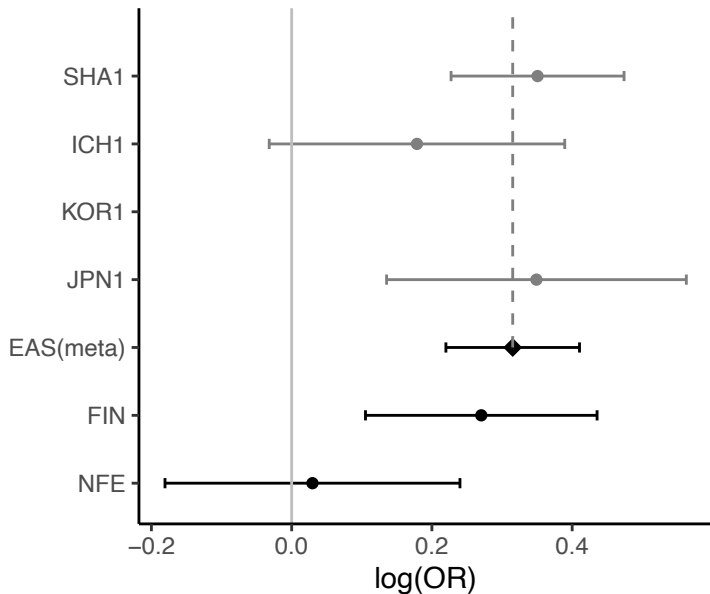

# CD Source: EAS

TNFSF15 rs7043505 chr9:114866248:G:A

Reference allele: G Effect allele: A

HetPval:  $9.28e-17^*$

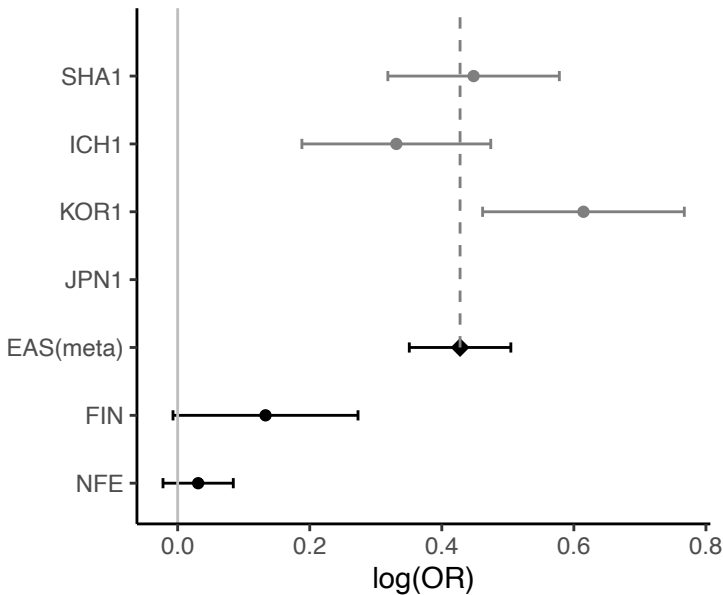



CD Source: EUR

CARD9 rs3812565 chr9:136378050:T:C

Reference allele: T Effect allele: C

HetPval:  $1.15e-07^*$

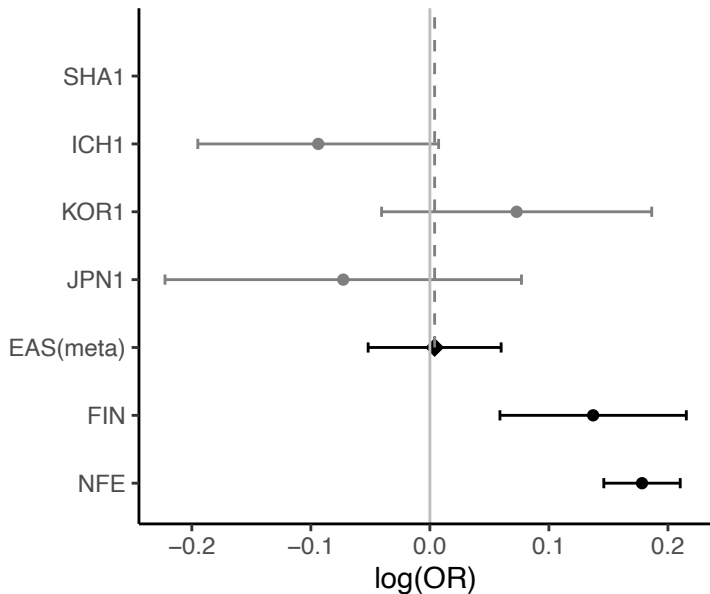

# CD Source: EUR

JAK2 rs1887428 chr9:4984530:G:C

Reference allele: G Effect allele: C

HetPval: 1.07e-02

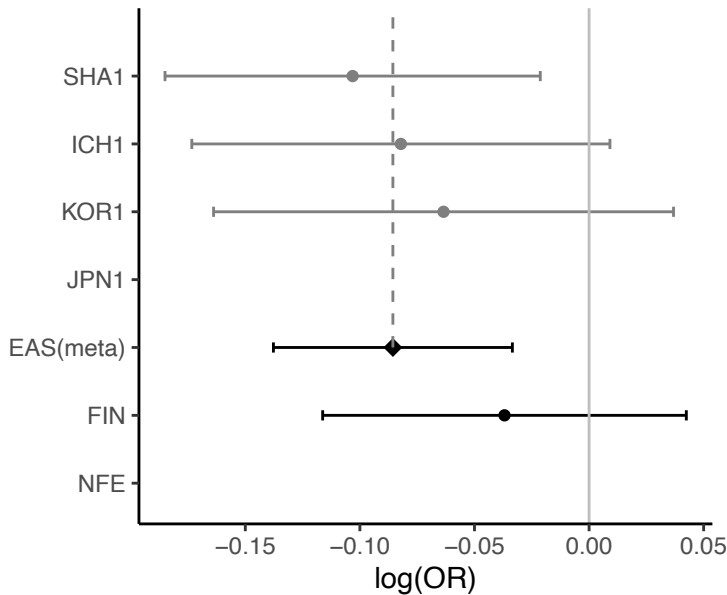

# UC Source: EAS

FCGR2A rs6671847 chr1:161509020:G:A

Reference allele: G Effect allele: A

HetPval: 6.71e-02

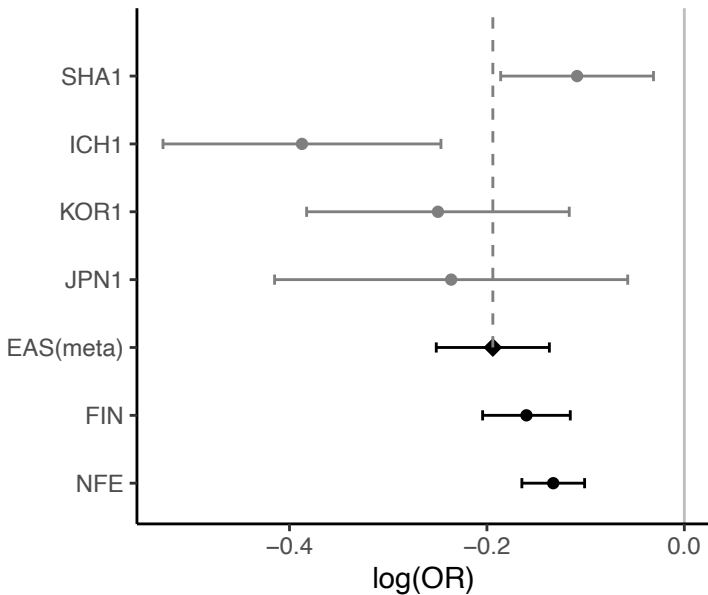

# UC Source: EUR

RNF186 rs4655215 chr1:19811221:T:C

Reference allele: T Effect allele: C

HetPval:  $2.06e-03^*$

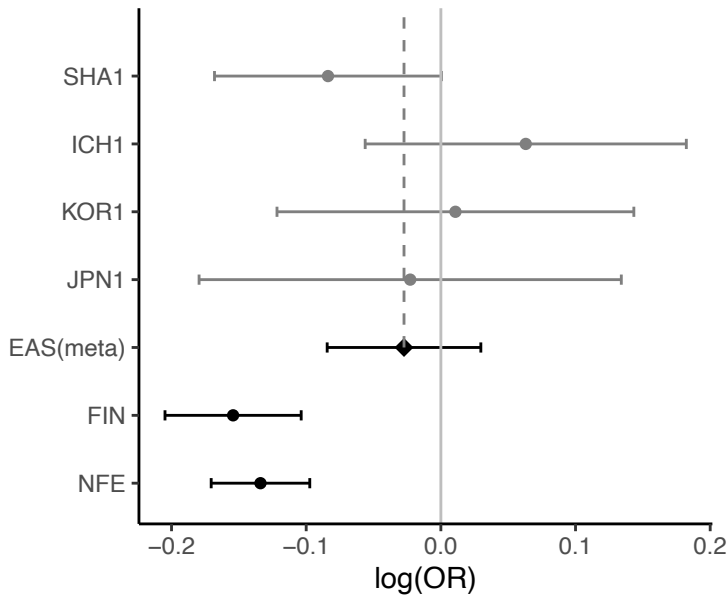

# UC Source: EUR

RNF186 rs6426833 chr1:19845367:G:A

Reference allele: G Effect allele: A

HetPval:  $3.65e-02$

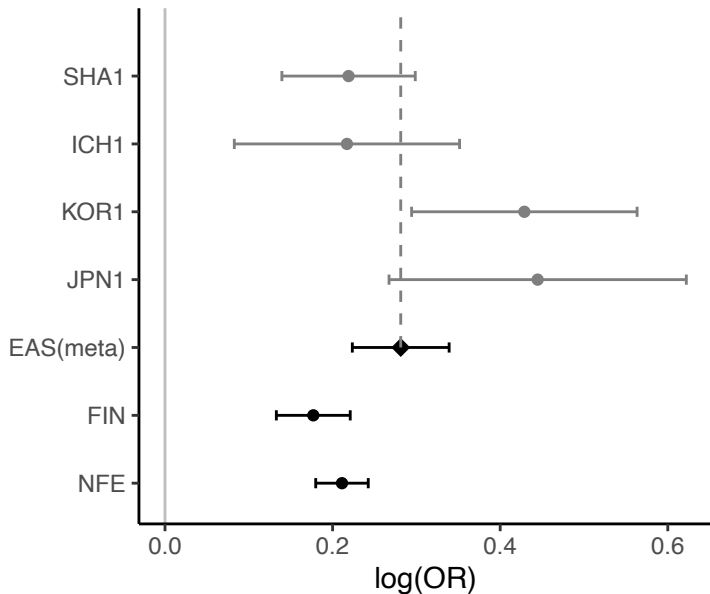

UC Source: EUR

IL10 rs3024493 chr1:206770623:C:A

Reference allele: C Effect allele: A

HetPval:  $4.15e-01$

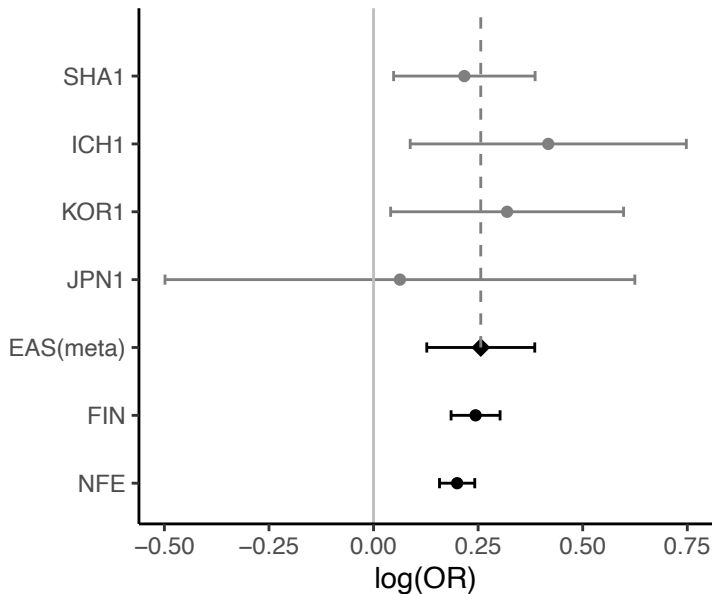

# UC Source: EAS

IL23R rs76418789 chr1:67182913:G:A

Reference allele: G Effect allele: A

HetPval:  $1.19e-04^*$

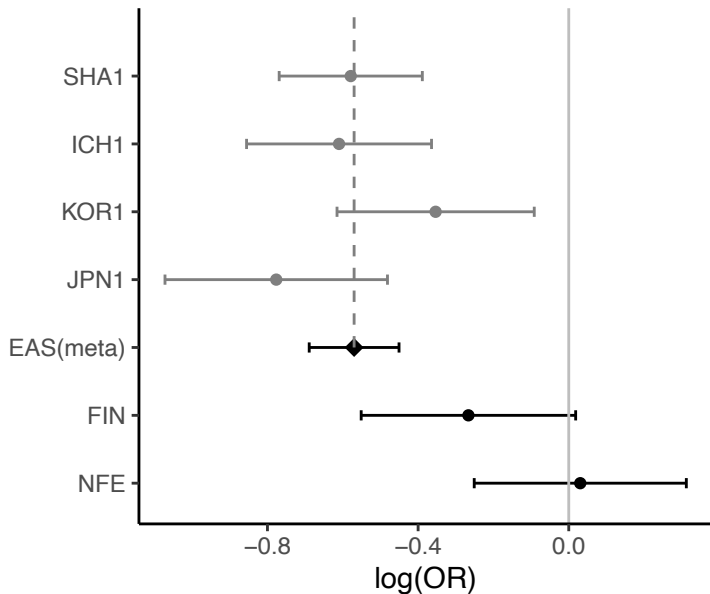

UC Source: EUR

IL23R rs2019262 chr1:67214307:G:A

Reference allele: G Effect allele: A

HetPval:  $3.14e-03$

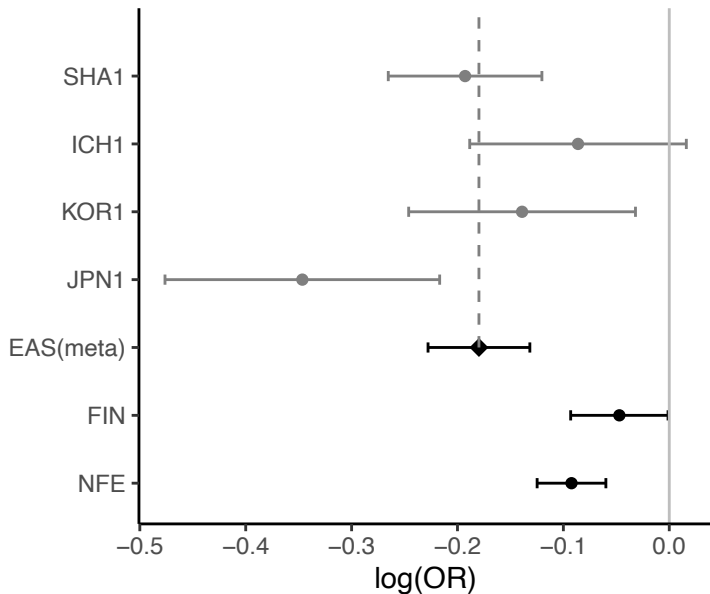



UC Source: EUR

NKX2-3 rs10748781 chr10:99523573:C:A

Reference allele: C Effect allele: A

HetPval: 1.87e-01

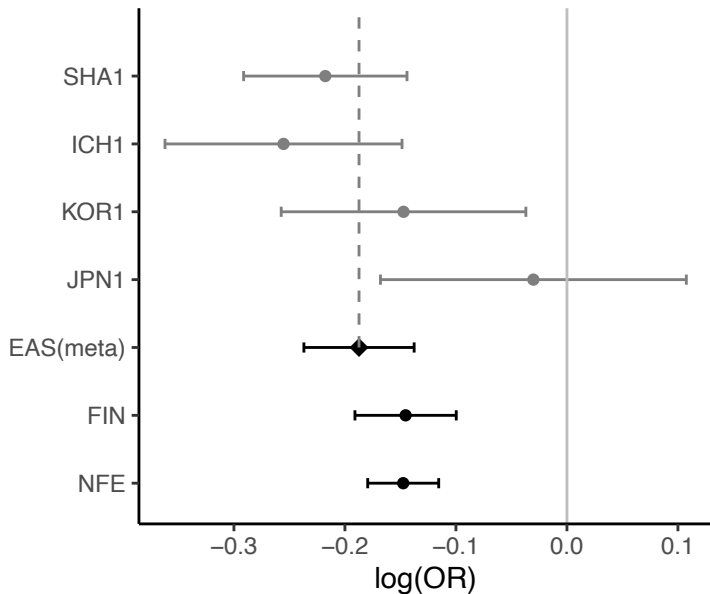

# UC Source: EAS

IRF8 rs16940186 chr16:85976134:T:C

Reference allele: T Effect allele: C

HetPval:  $4.1e-03$

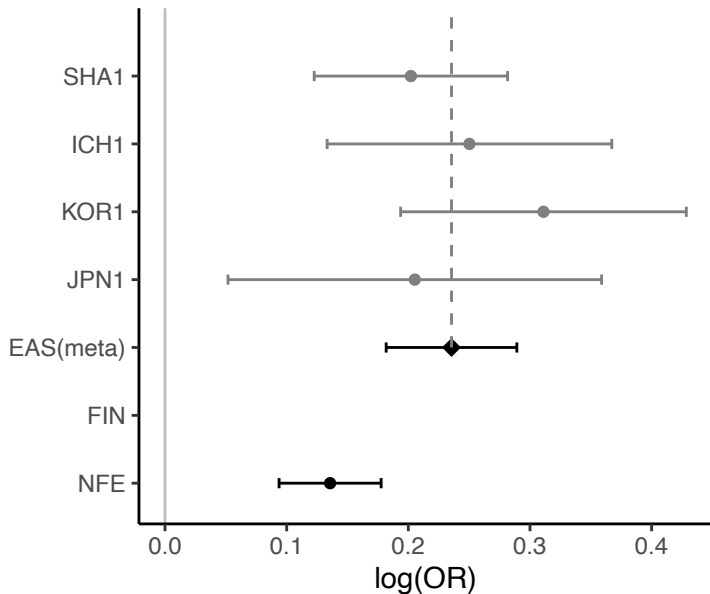

UC Source: EUR

GPR35 rs4676408 chr2:240634984:G:A

Reference allele: G Effect allele: A

HetPval: 8.88e-02

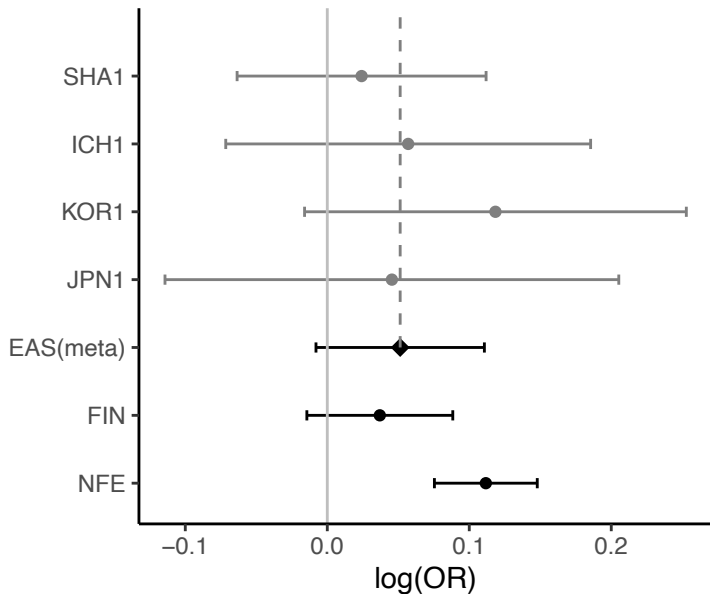

UC Source: EUR

HNF4A rs6017342 chr20:44436388:A:C

Reference allele: A Effect allele: C

HetPval: 5.88e-01

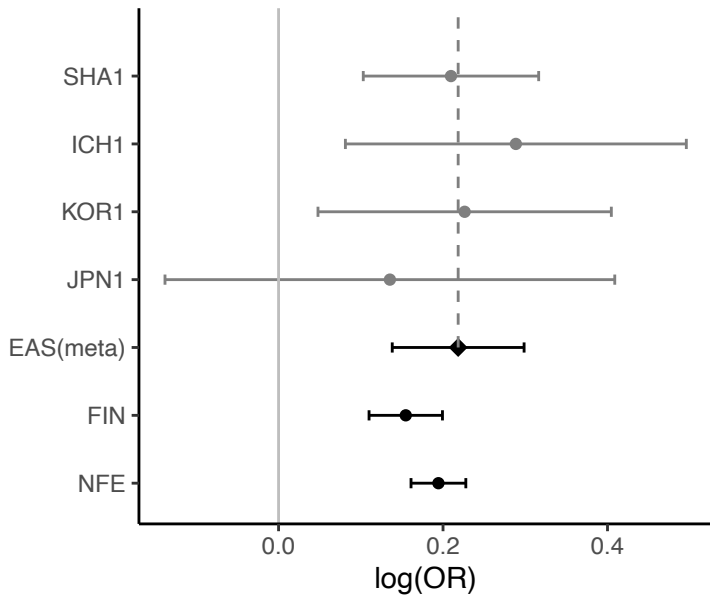

UC Source: EUR

TNFRSF6B rs6062496 chr20:63697746:G:A

Reference allele: G Effect allele: A

HetPval: 4.55e-01

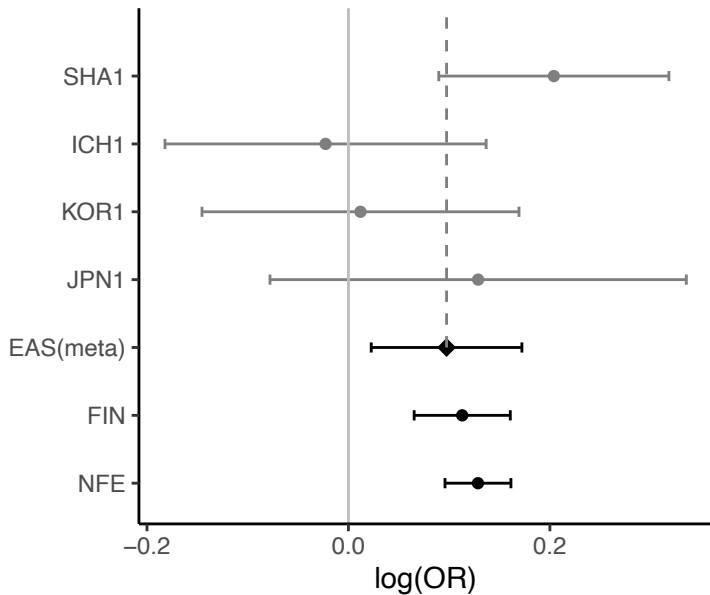

UC Source: EUR

PDGFB rs2143178 chr22:39264824:T:C

Reference allele: T Effect allele: C

HetPval: 3.81e-02

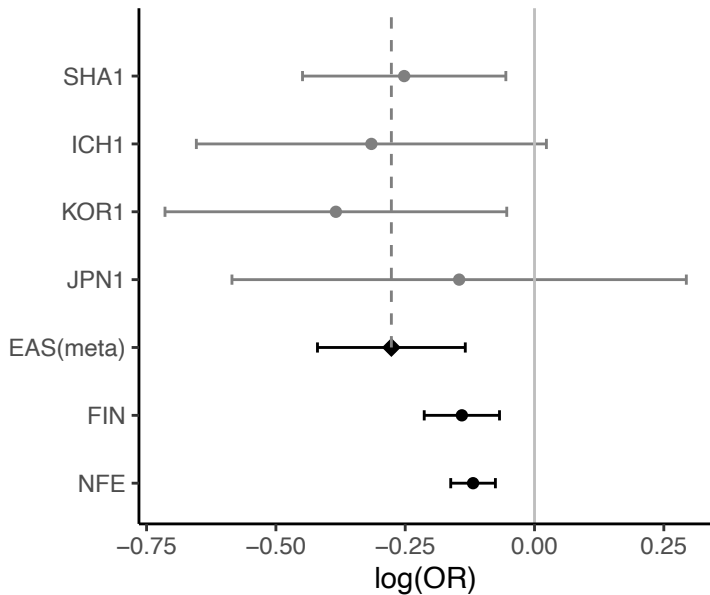

# UC Source: EUR

IL12B rs56167332 chr5:159400761:C:A

Reference allele: C Effect allele: A

HetPval:  $4.18e-01$

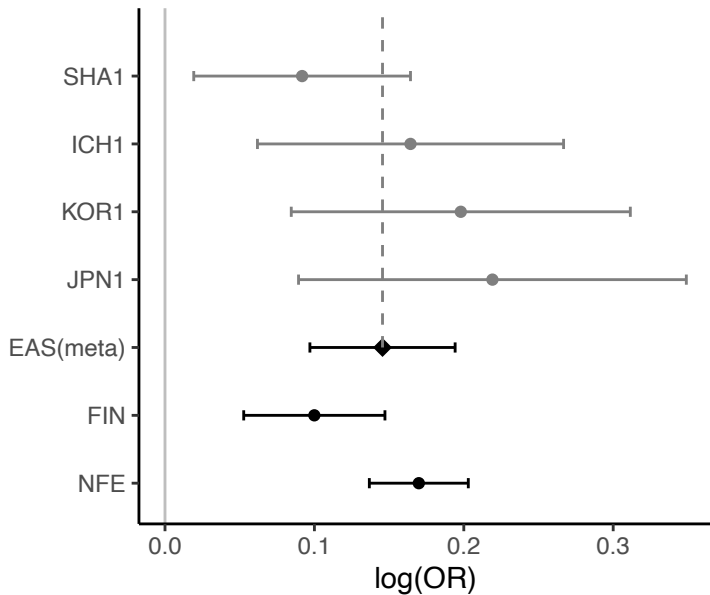

# UC Source: EUR

IRF5 rs4728142 chr7:128933913:G:A

Reference allele: G Effect allele: A

HetPval: 2.71e-01

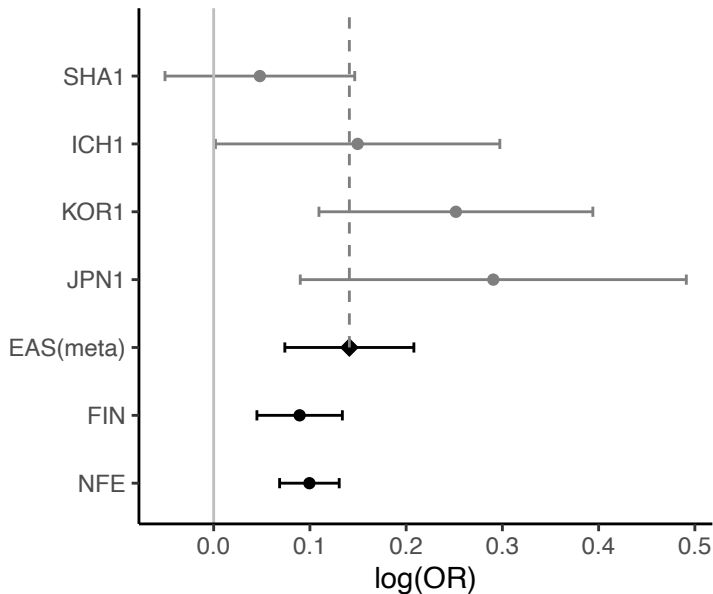



UC Source: EUR

CARD9 rs3812565 chr9:136378050:T:C

Reference allele: T Effect allele: C

HetPval: 1.26e-01

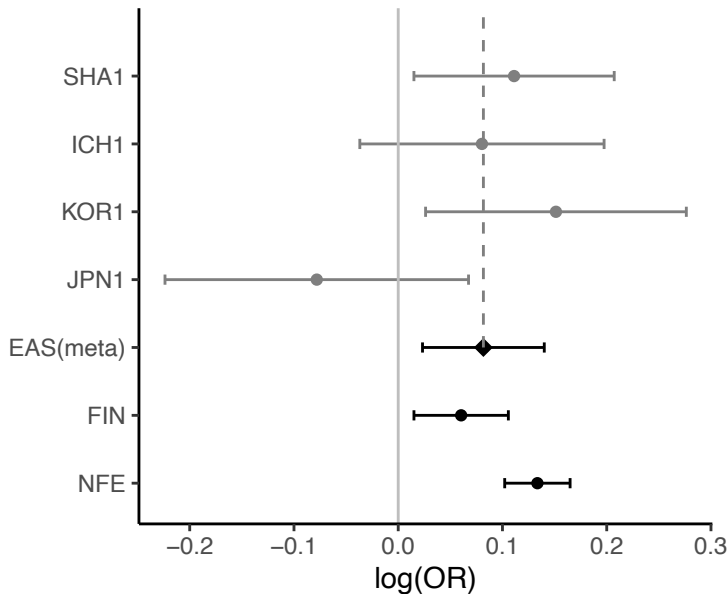

# UC Source: EUR

JAK2 rs1887428 chr9:4984530:G:C

Reference allele: G Effect allele: C

HetPval:  $4.71e-02$

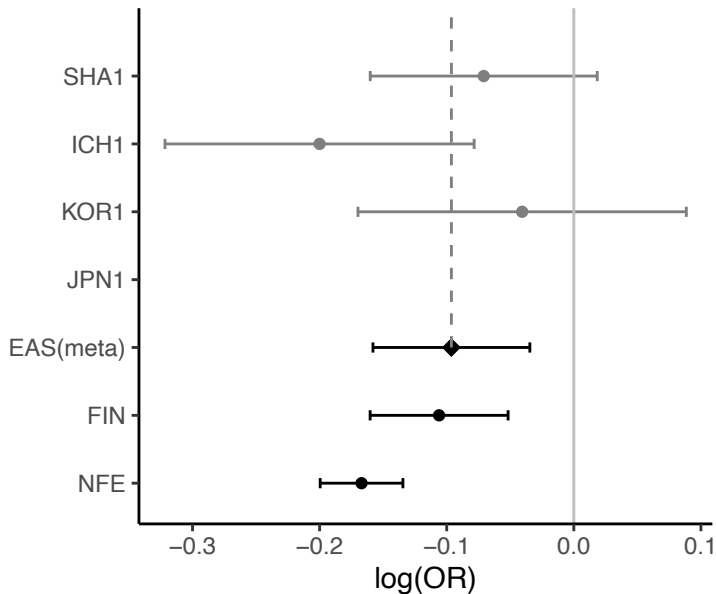

Supplement: NIHMS1903722-supplement-SD_4.pdf [file NIHMS1903722-supplement-SD_4.pdf]
