# Supplementary material
Source: PubMed Central journal article supplement (PMC10290755)

**Supplementary Data 1. Manhattan plot for IBD genetic associations.** IBD genetic association analyses were performed on East Asian samples (EAS) through the fixed-effect meta-analysis (two-tailed, FE) or East Asian and European samples (EAS+EUR) through FE or Bayesian transethnic meta-analysis (MANTRA). P: original P-value from FE. BF: Bayes Factor from MANTRA. Horizontal line: the genome-wide significance threshold ( $P < 5 \times 10^{-8}$ ) for FE or the genome-wide Bayes Factor (BF) threshold ( $BF > 10^6$ ) for MANTRA.

# EAS CD

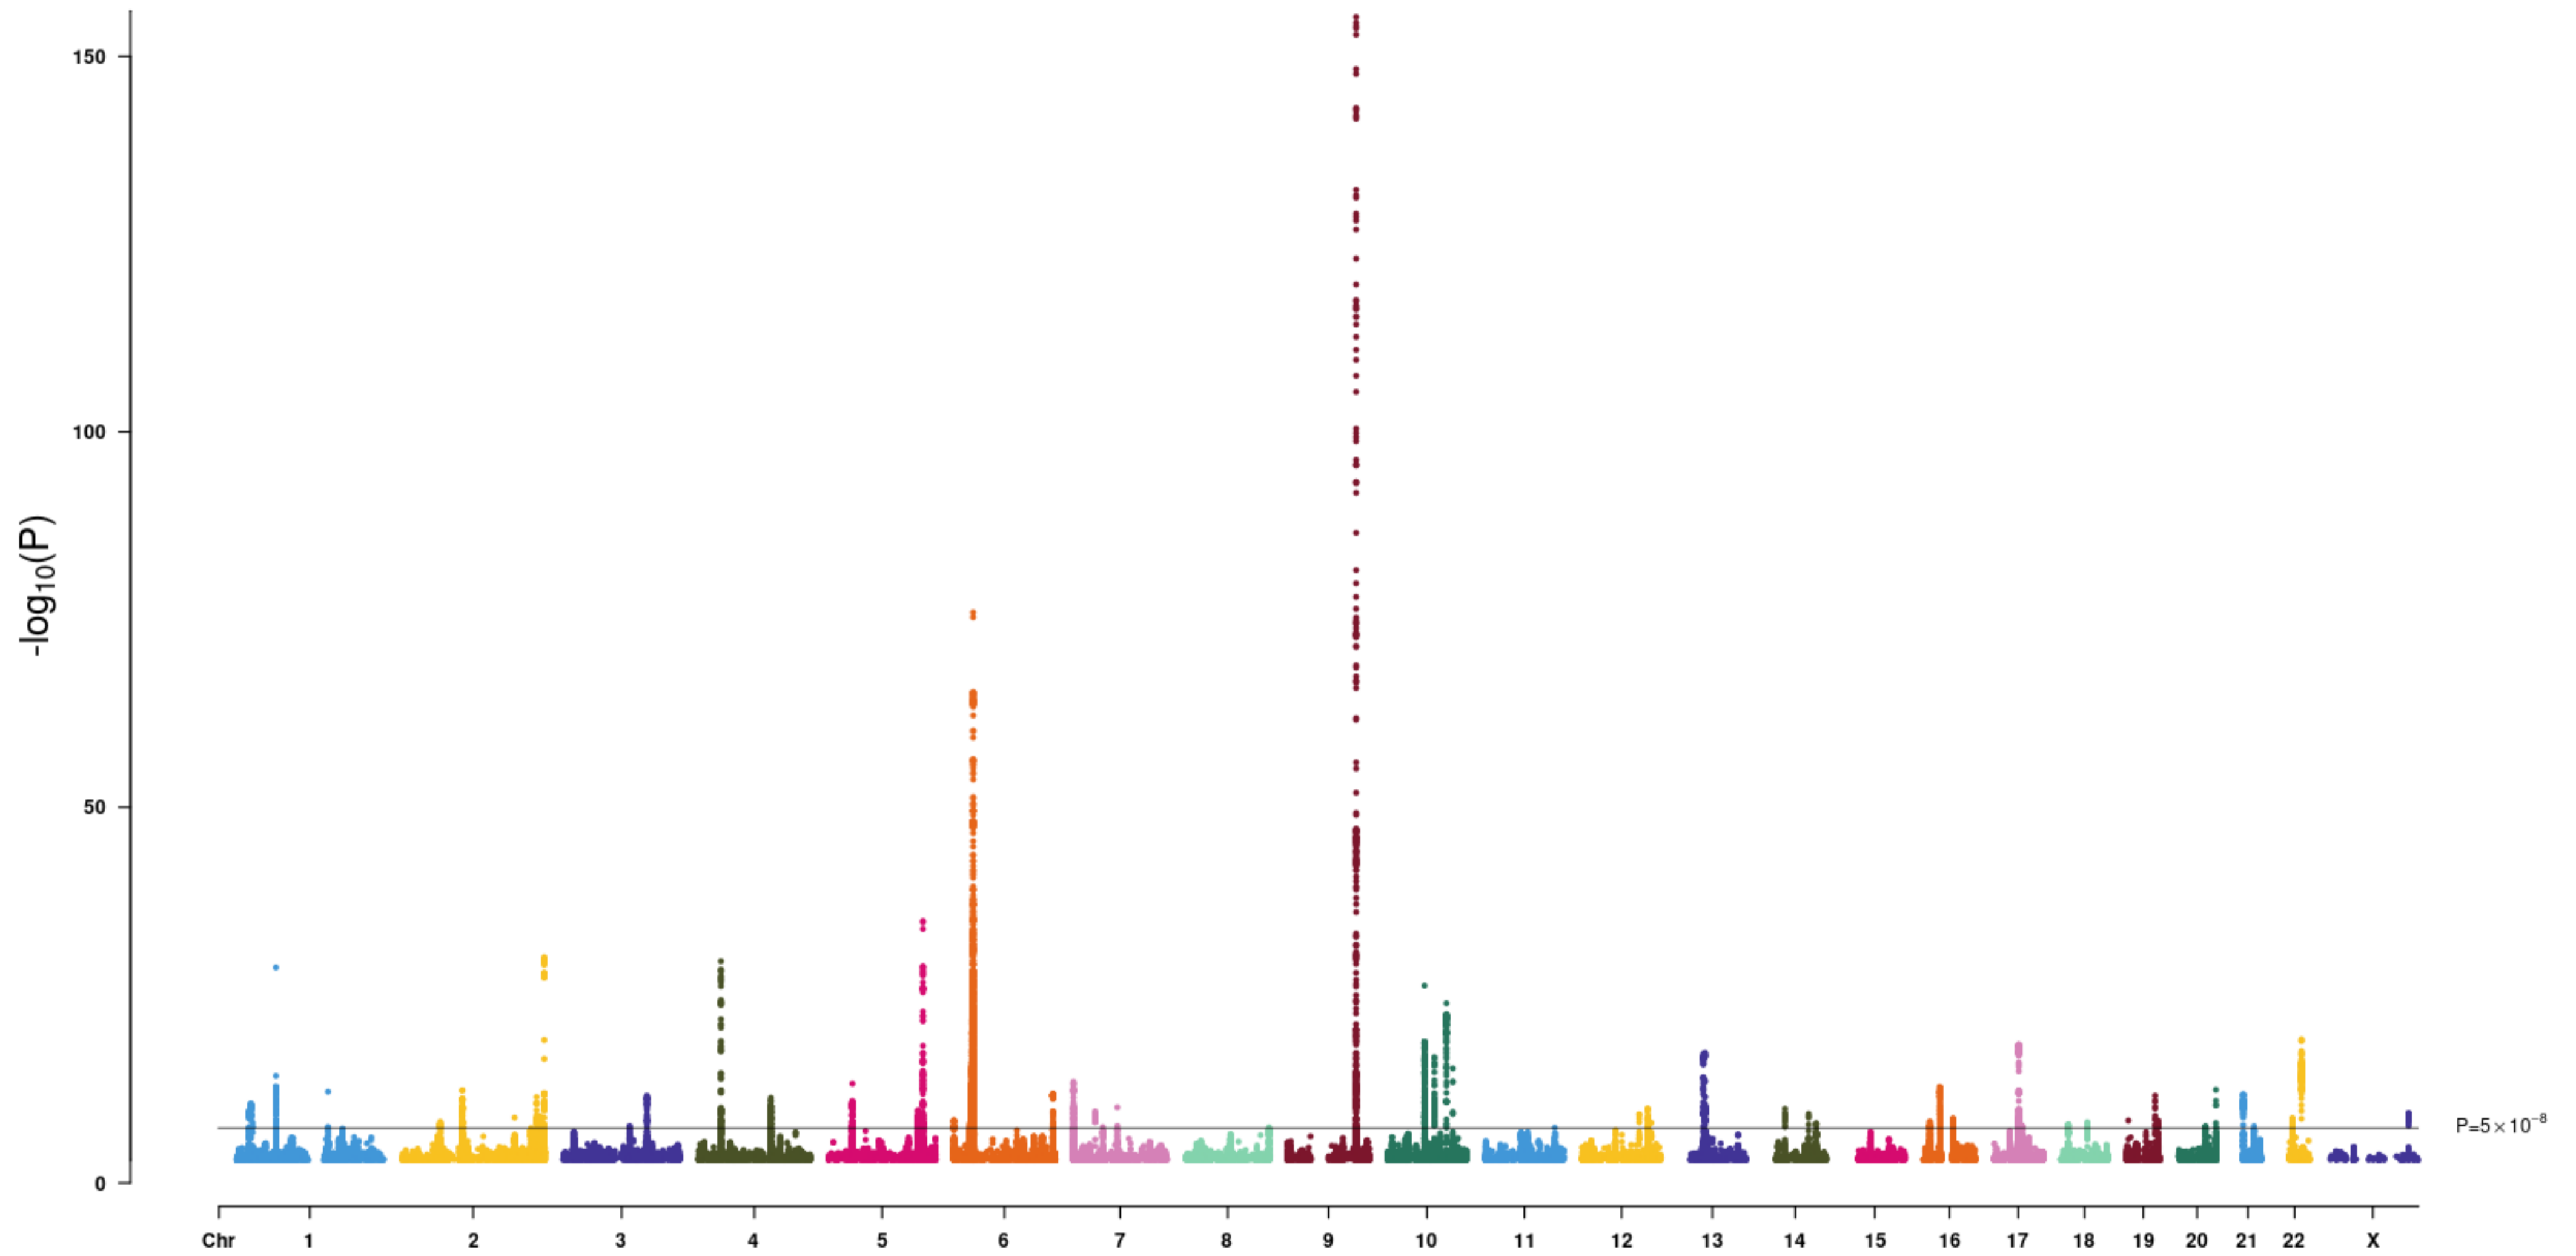

# EAS UC

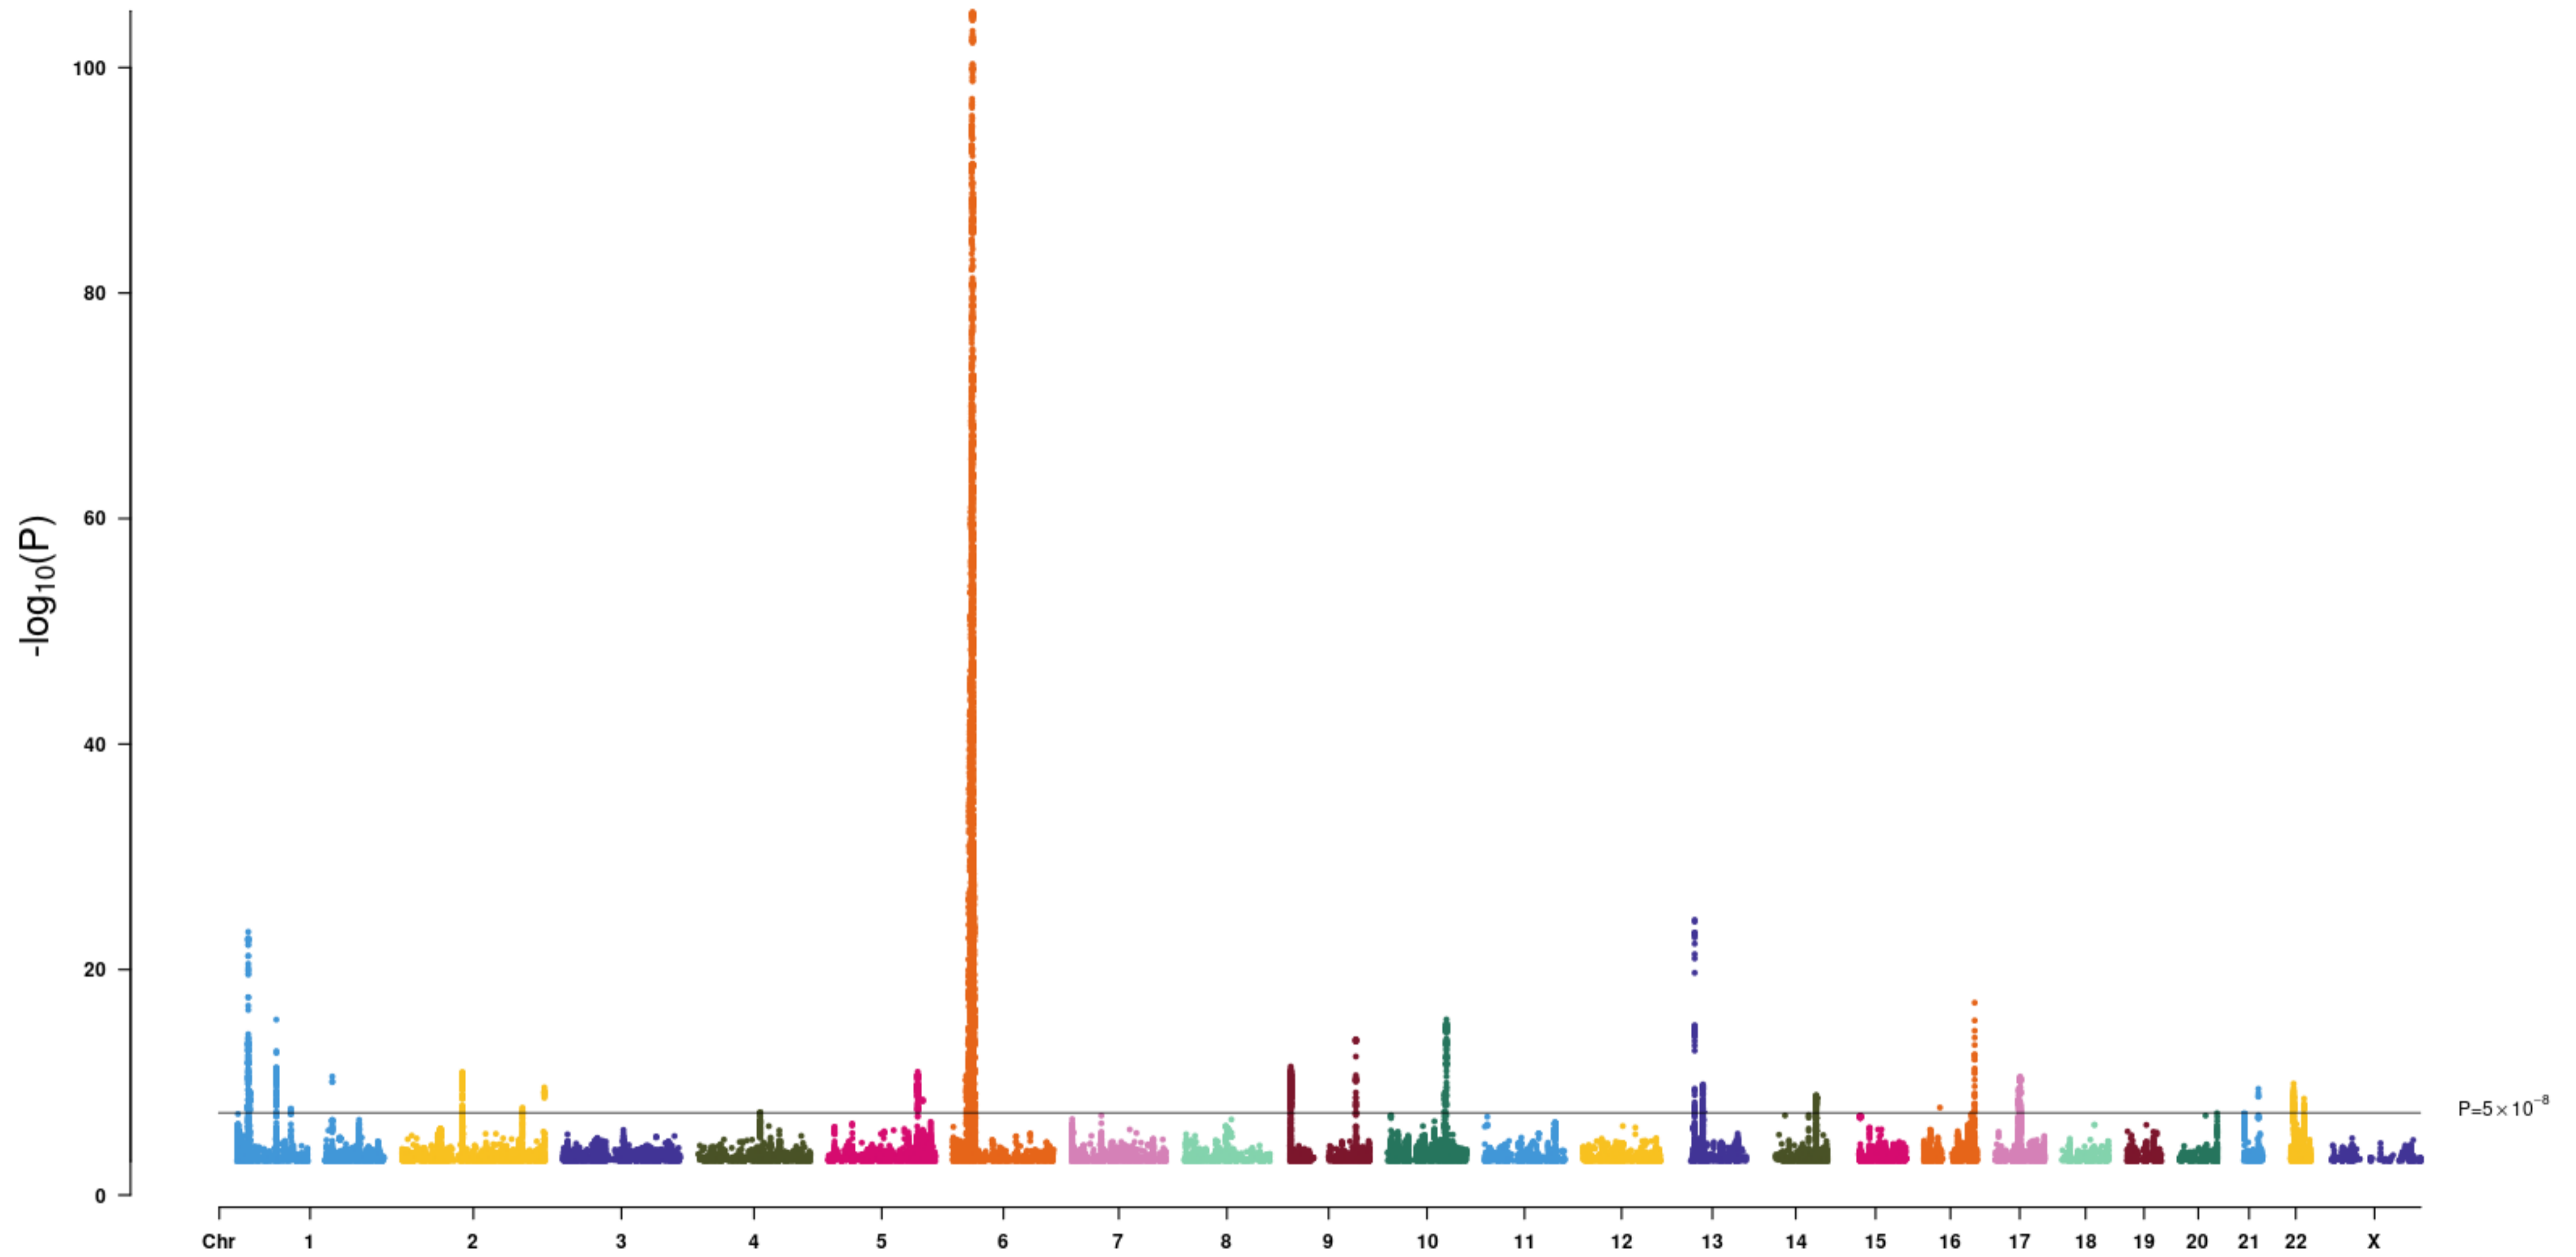

# EAS IBD

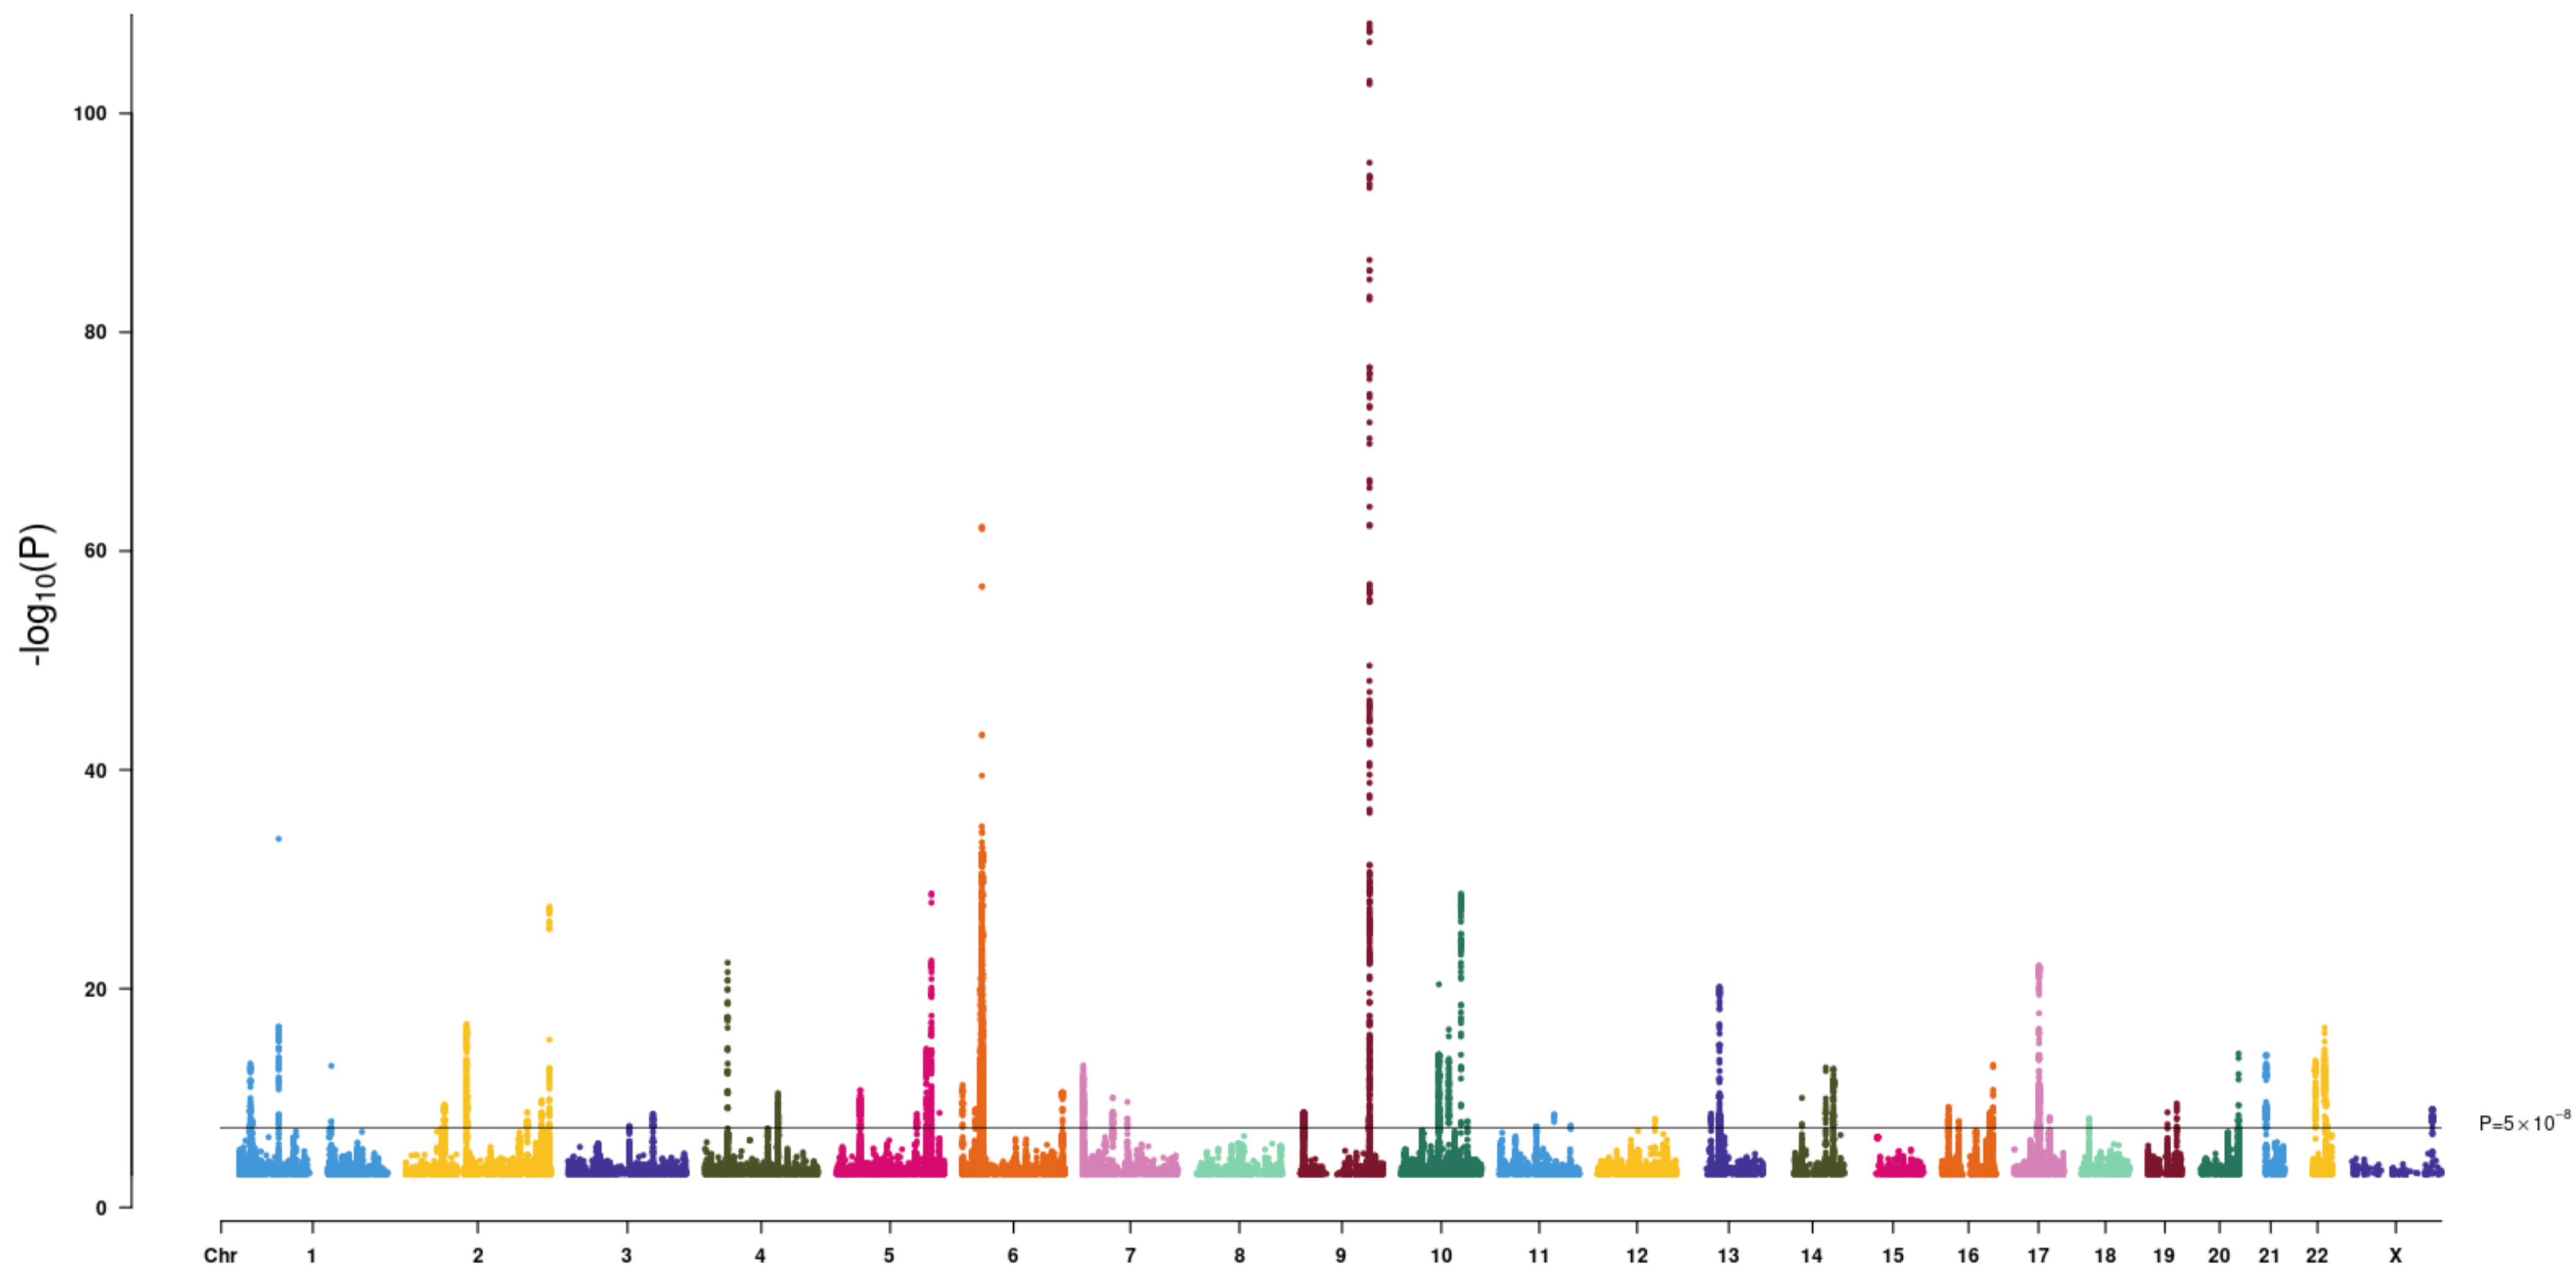

# EAS+EUR CD FE

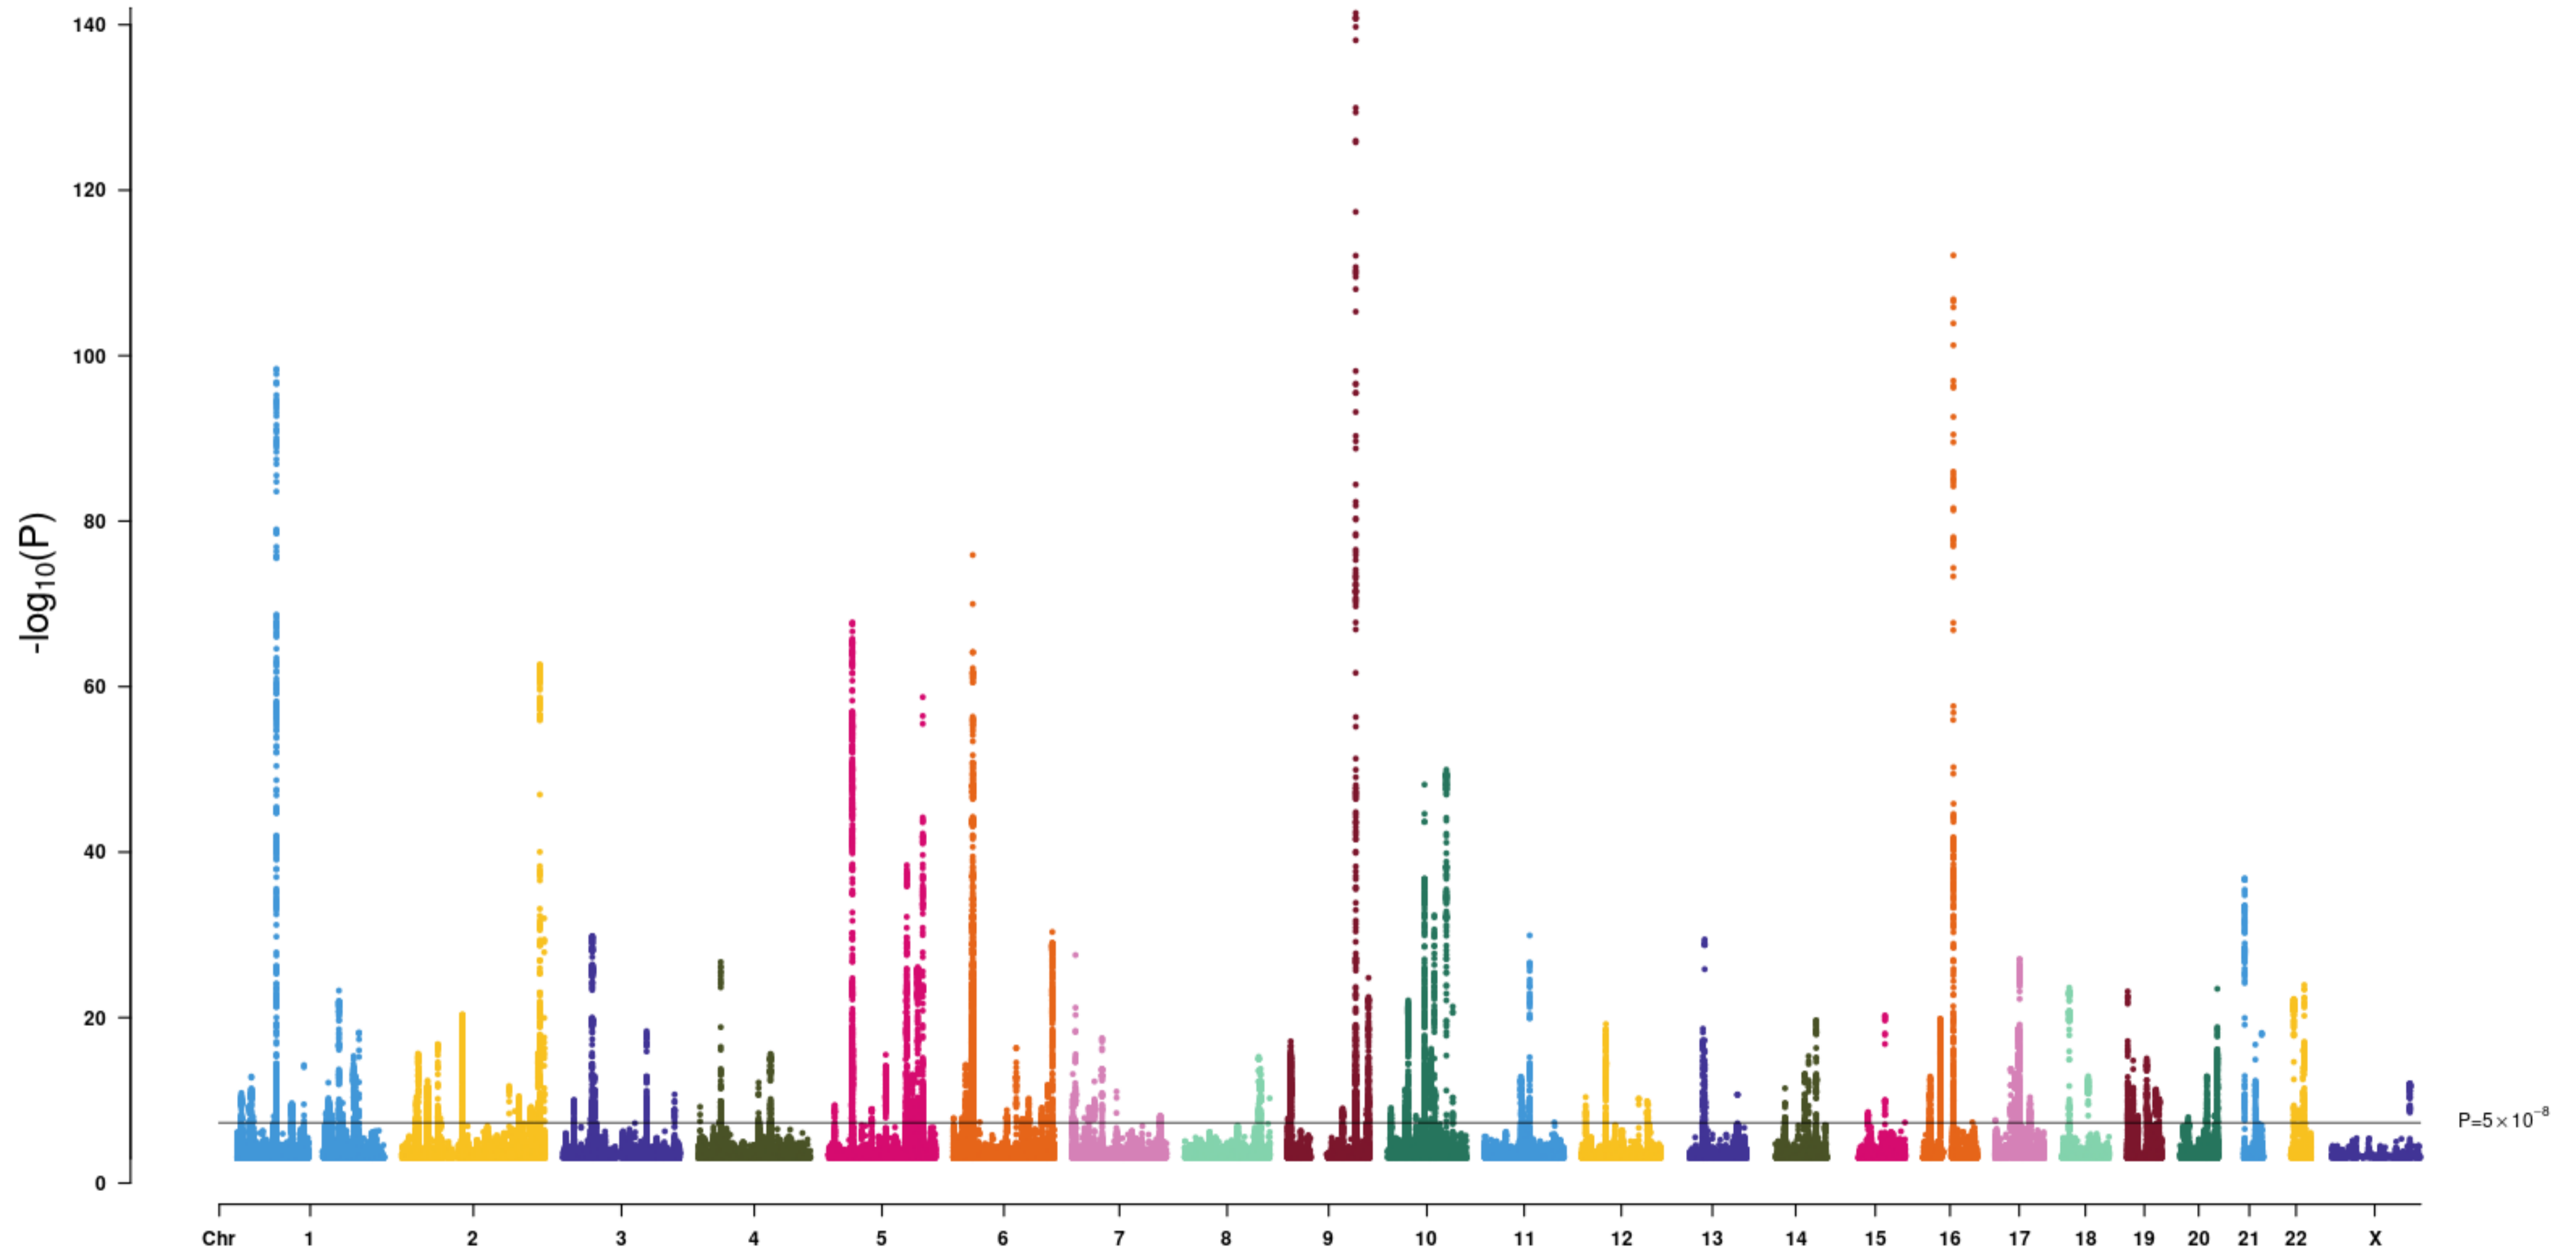

# EAS+EUR CD MANTRA

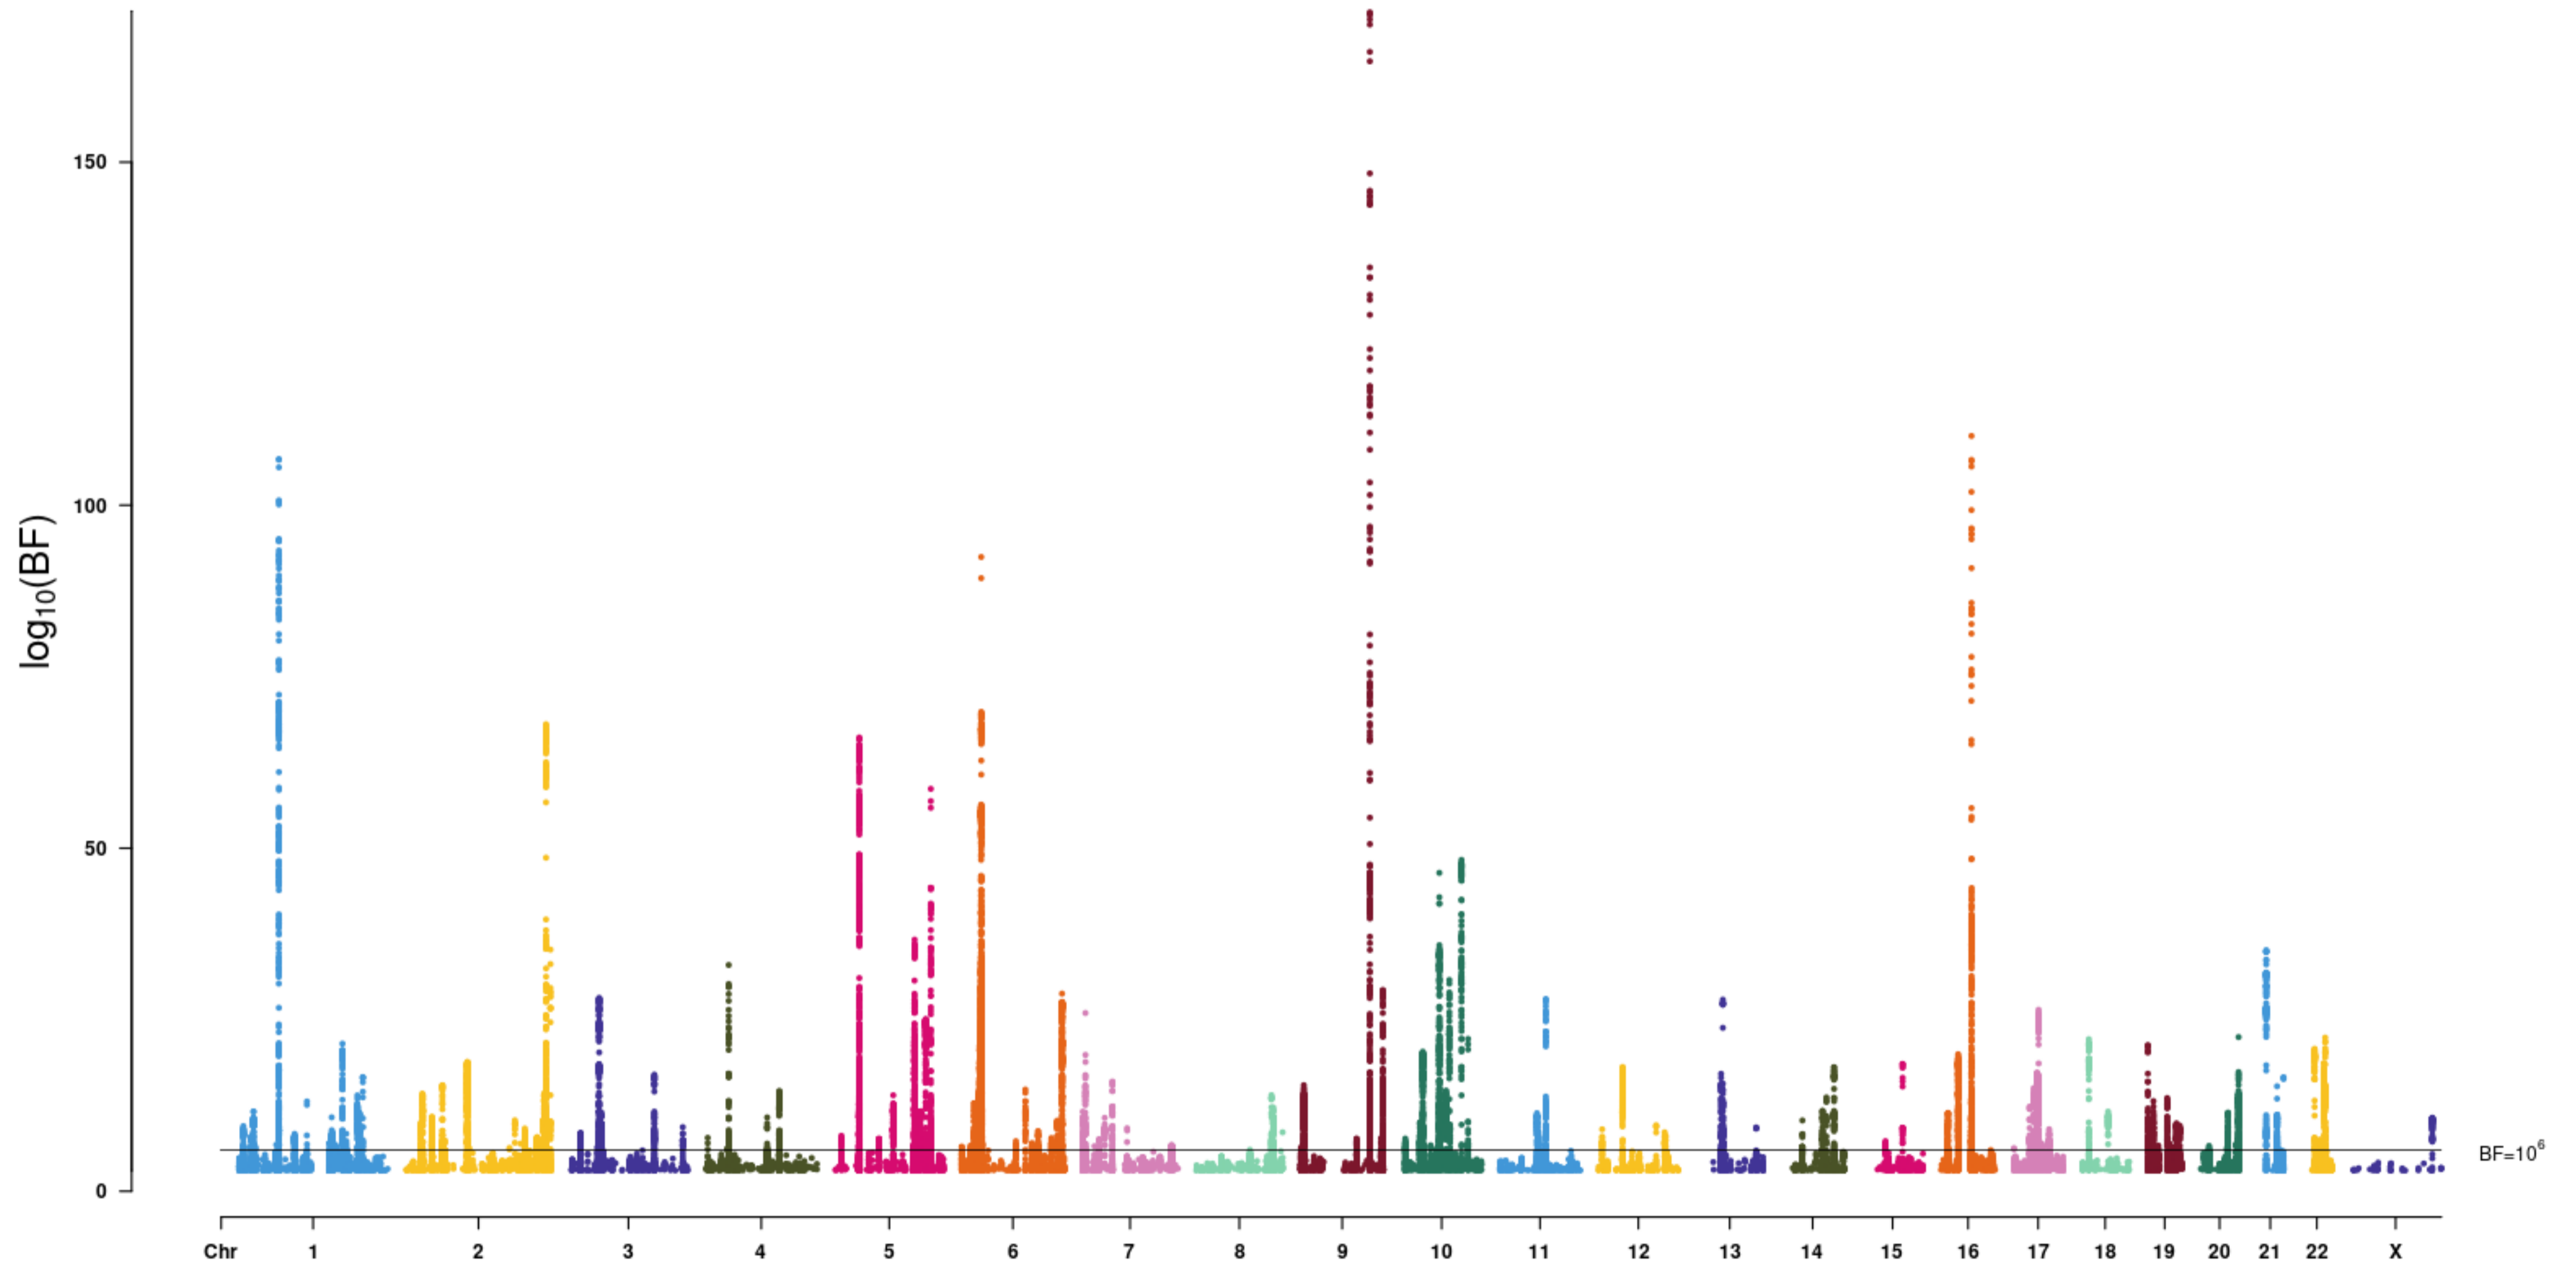

# EAS+EUR UC FE

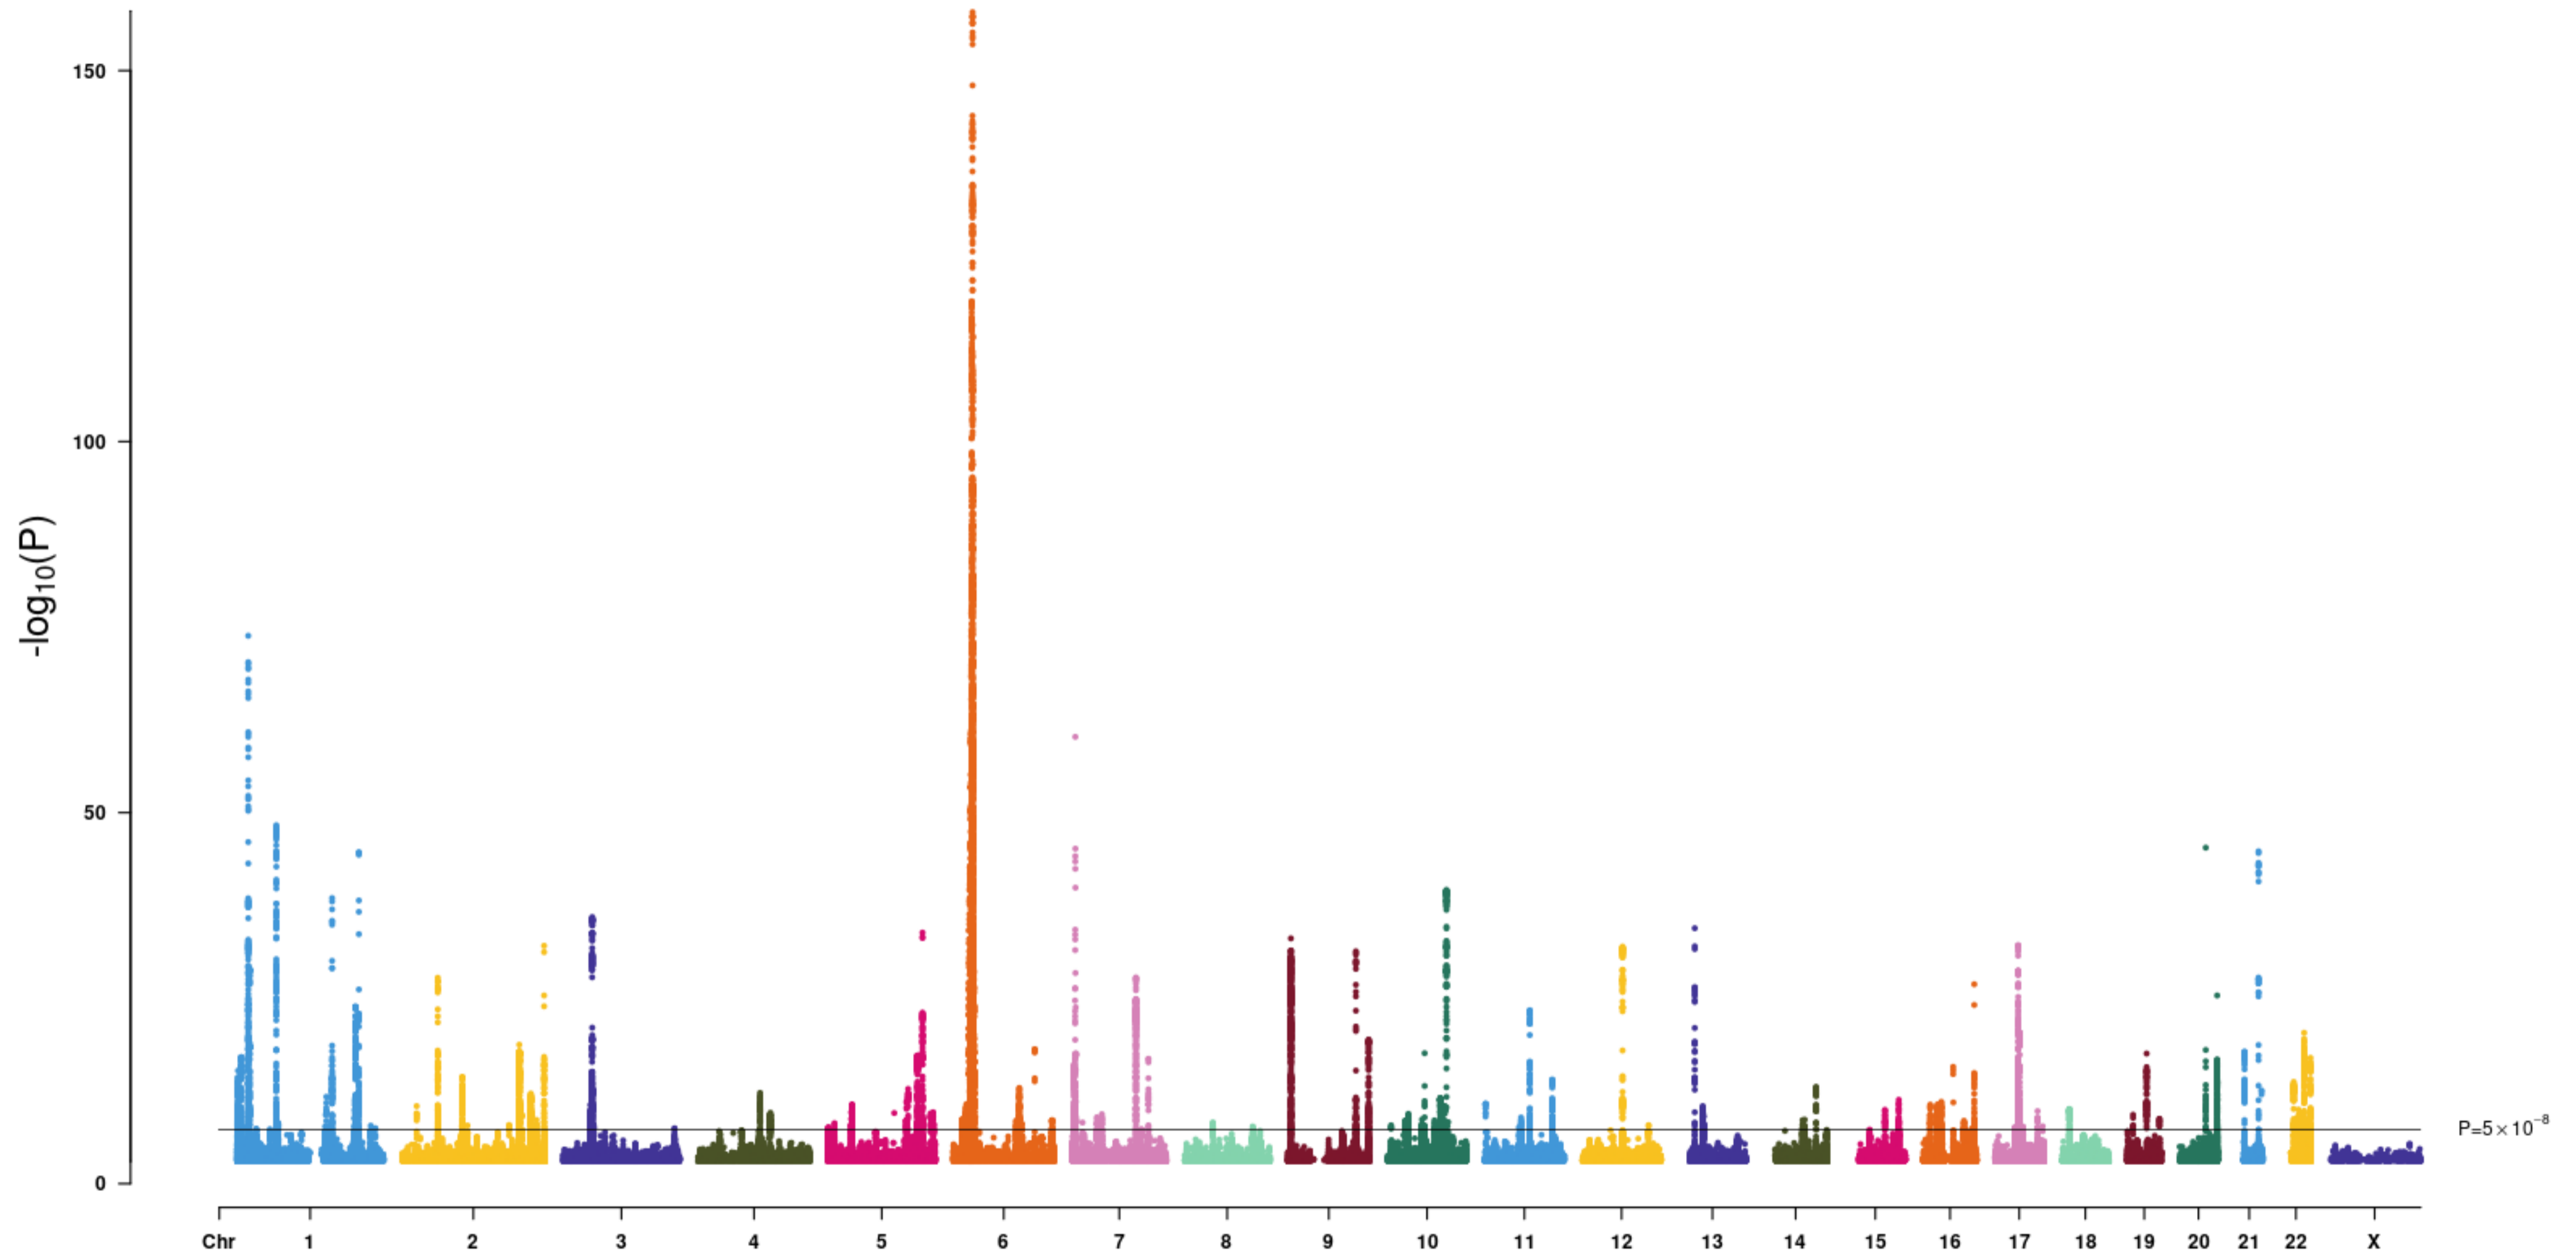

# EAS+EUR UC MANTRA

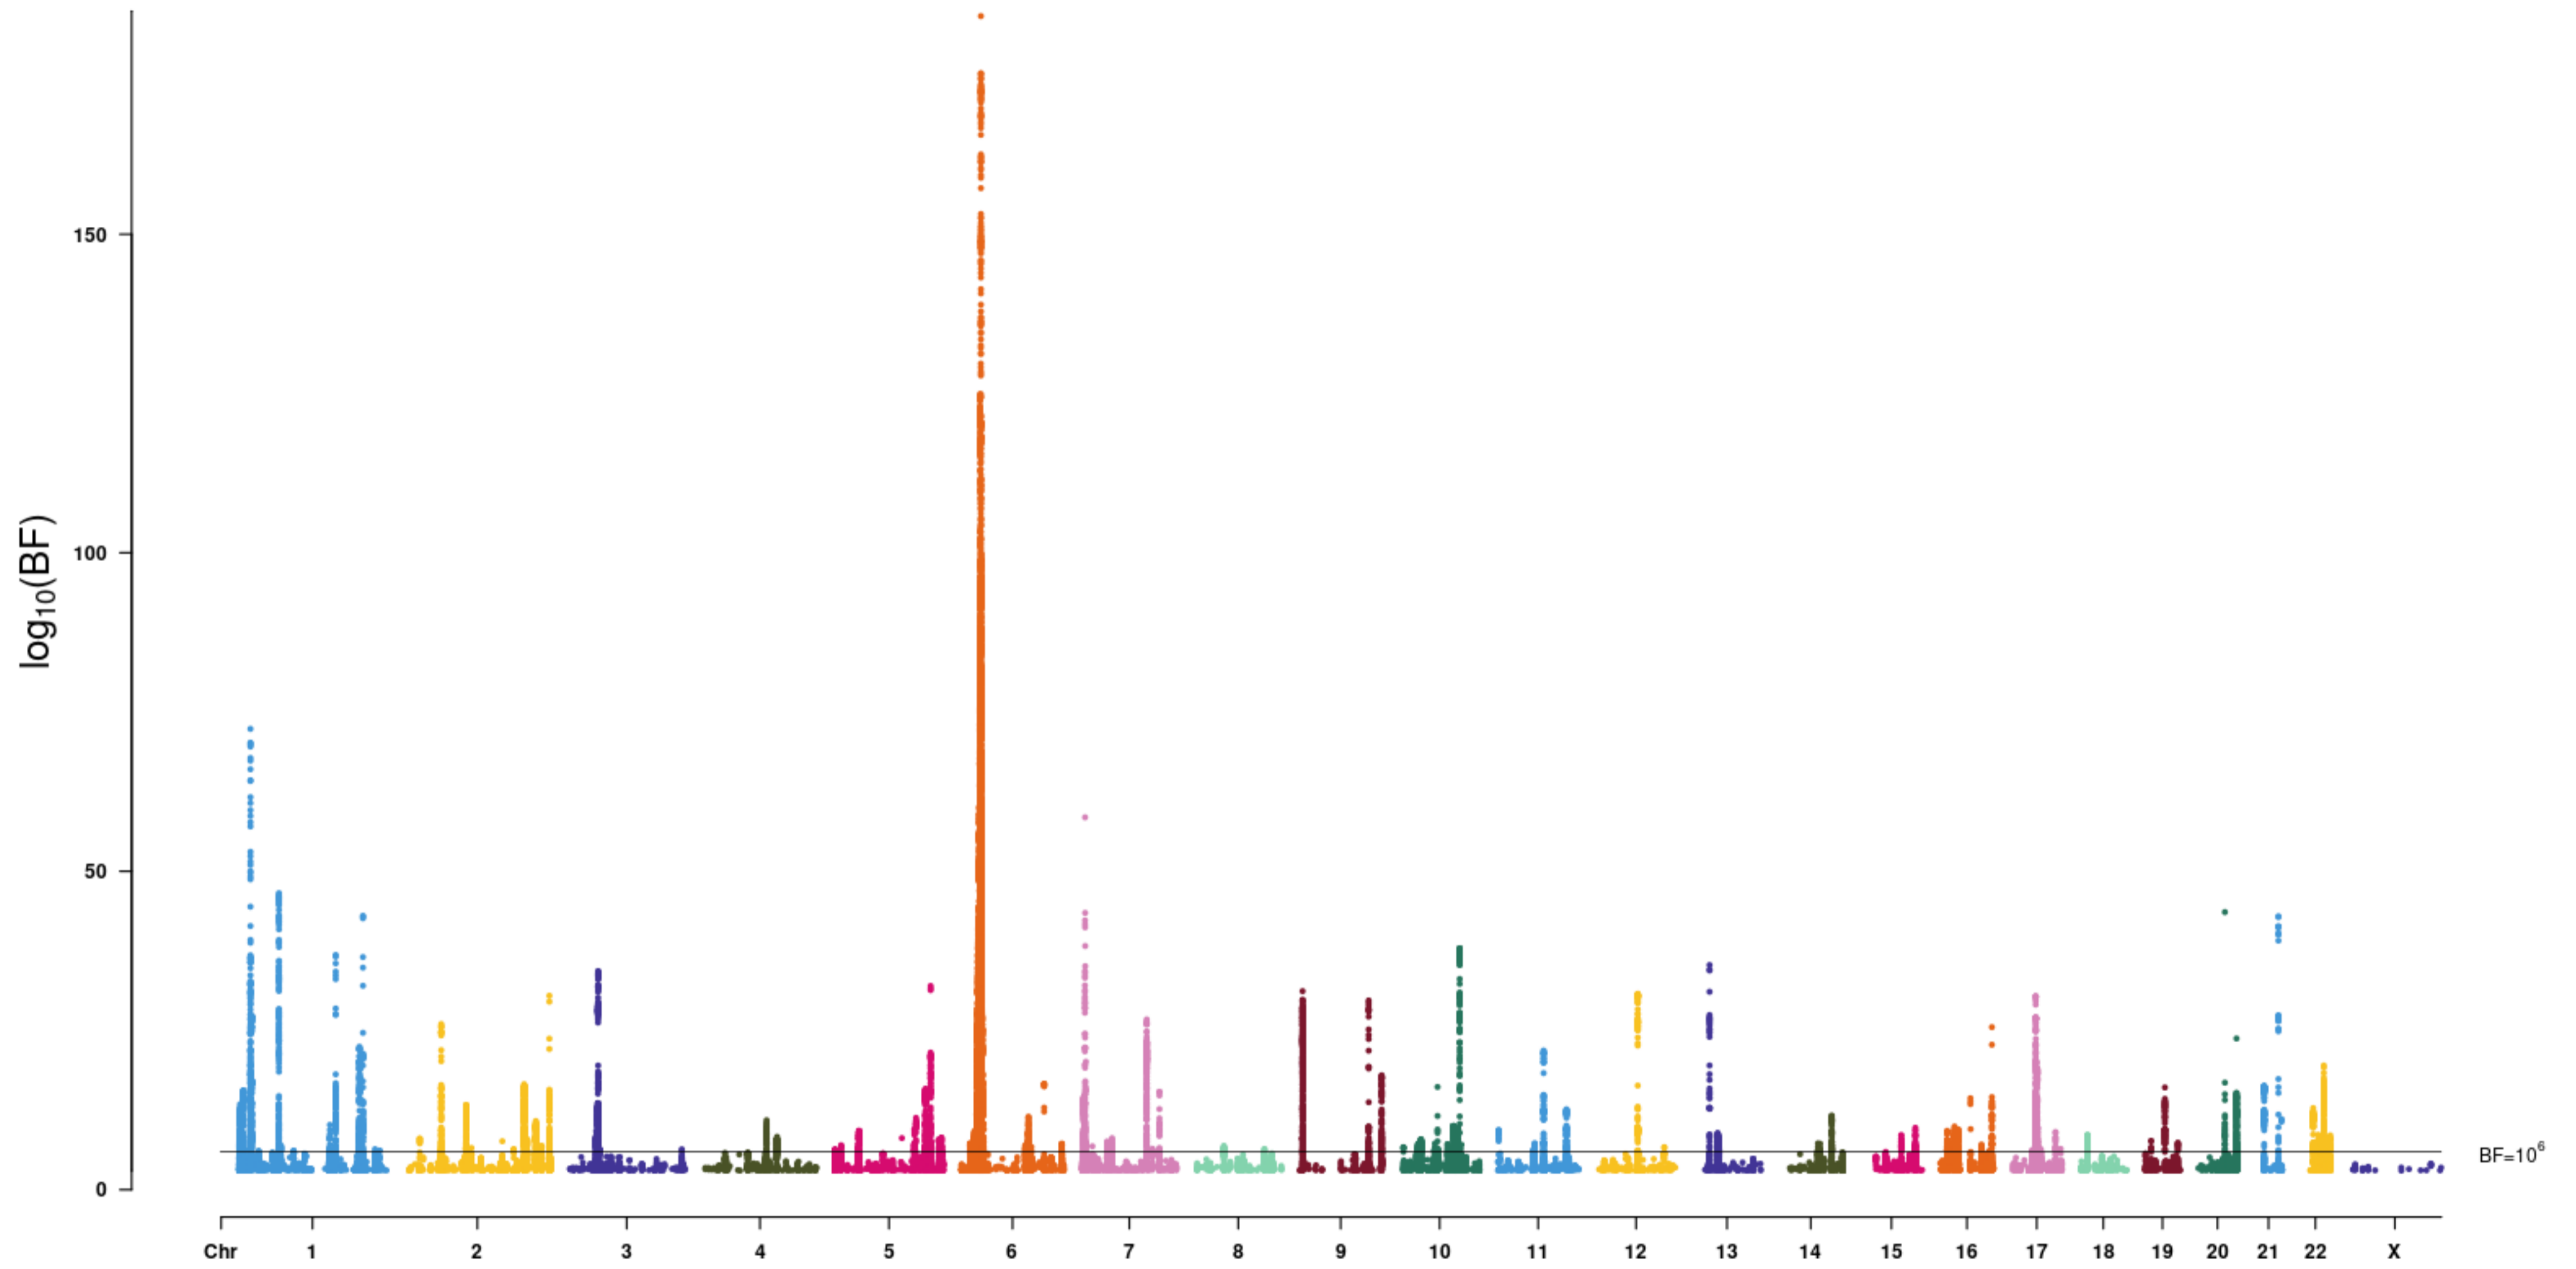



# EAS+EUR IBD FE

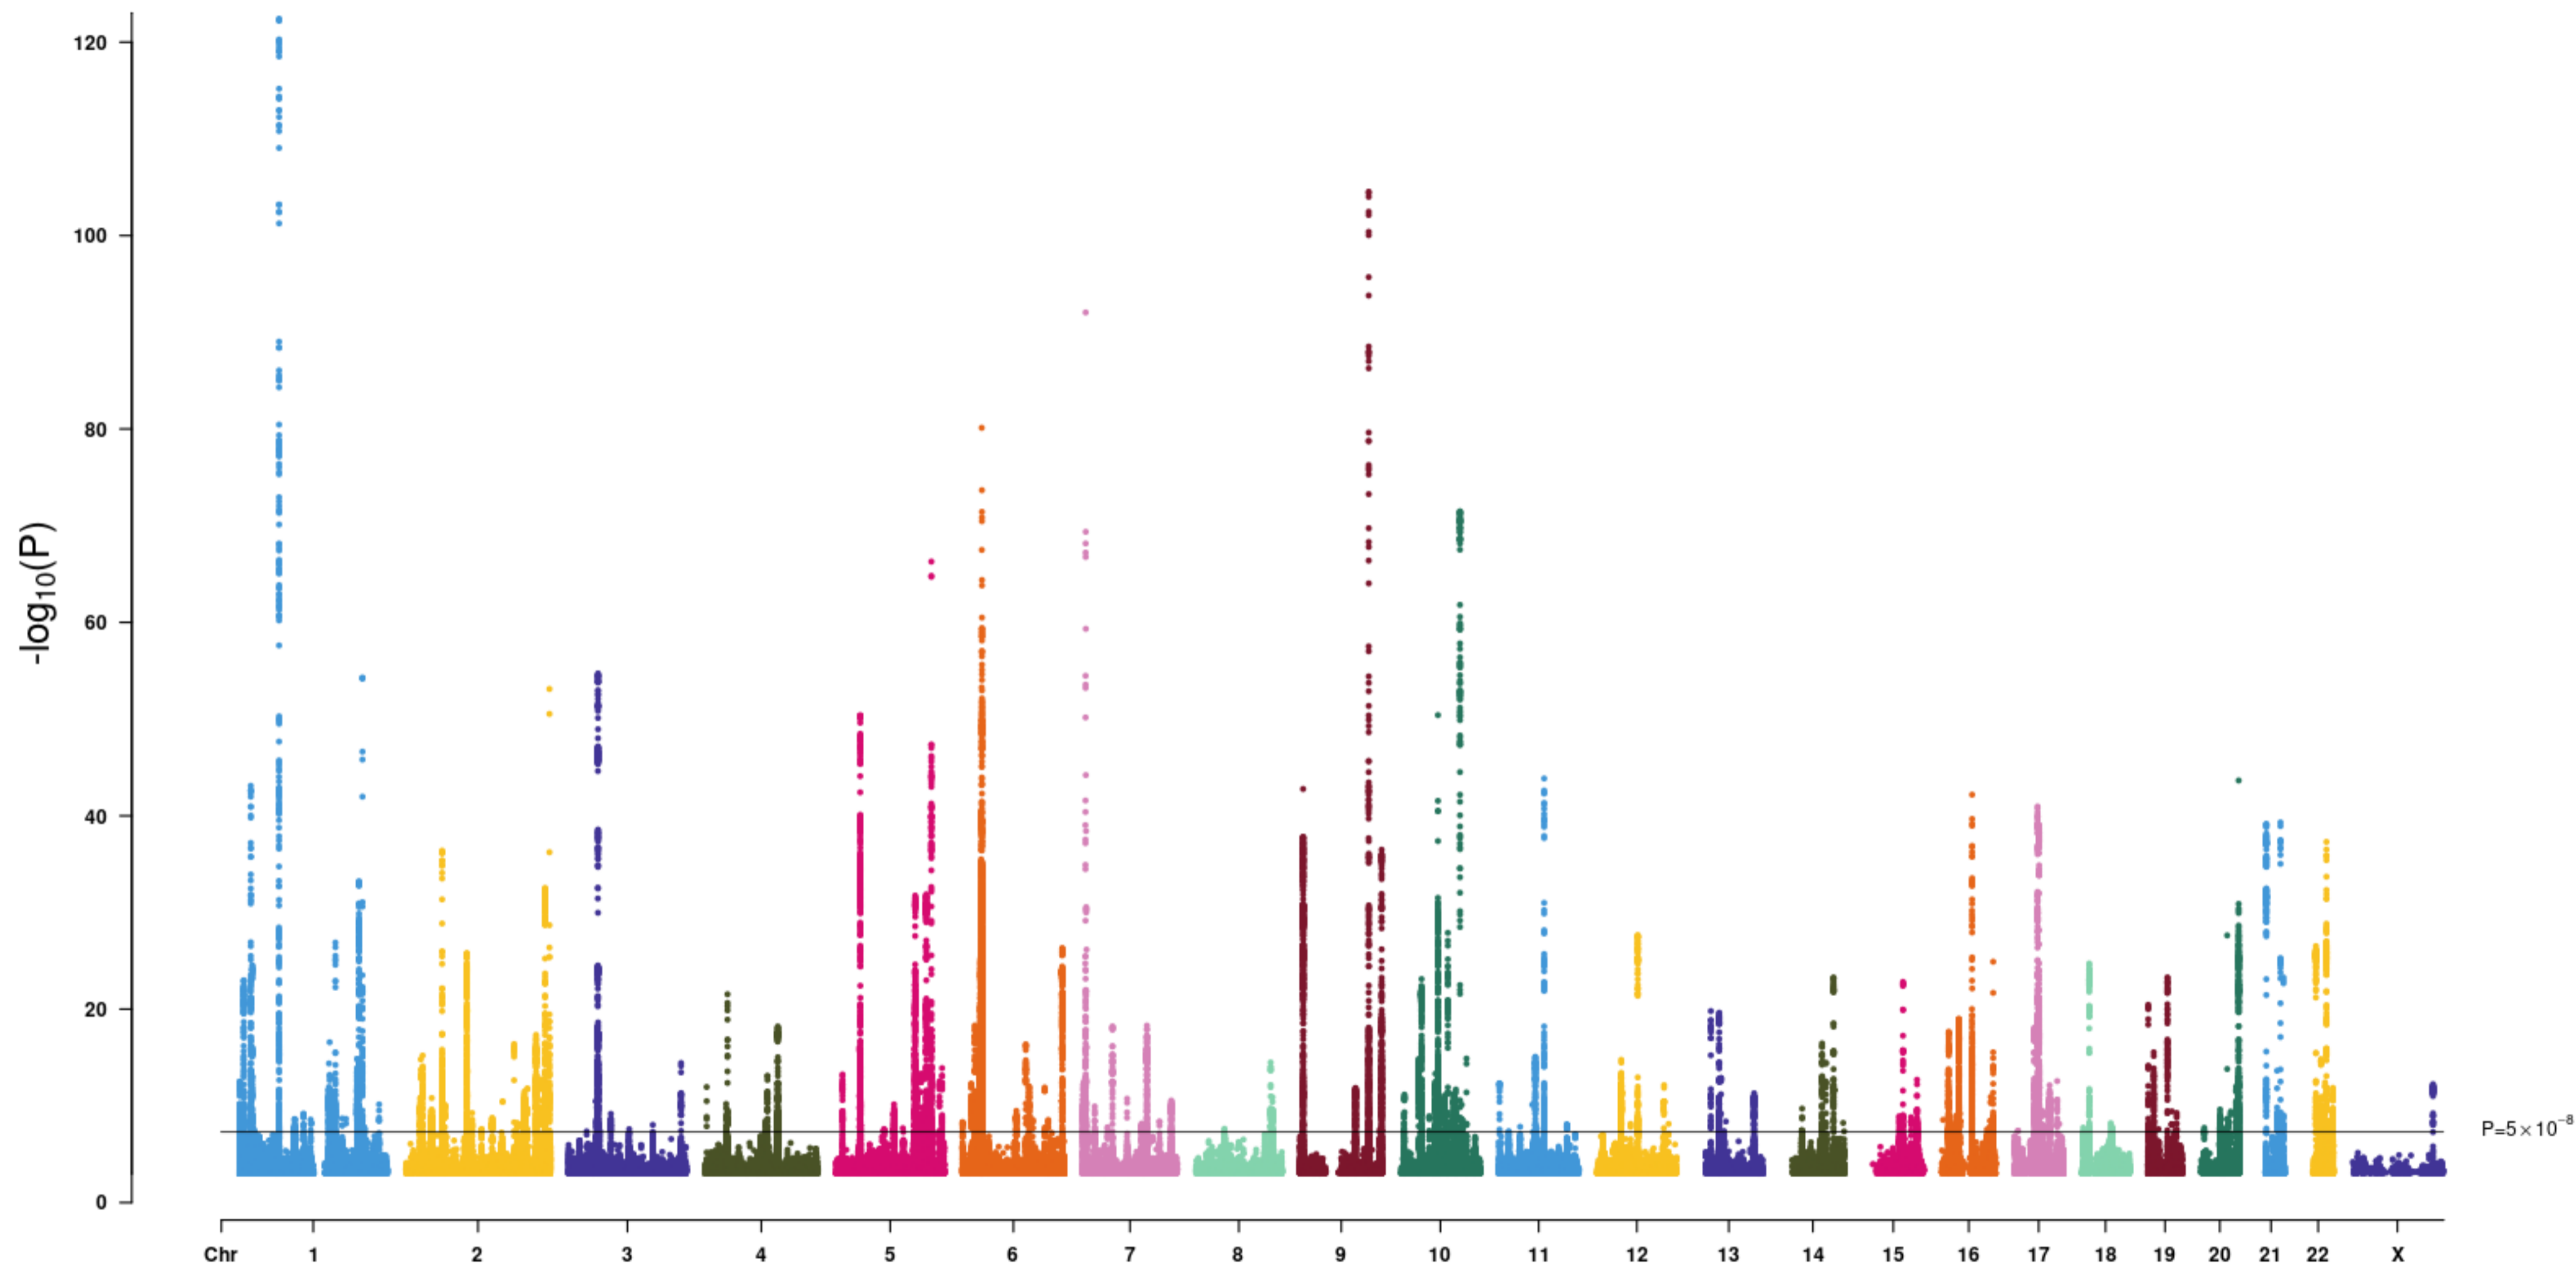

# EAS+EUR IBD MANTRA

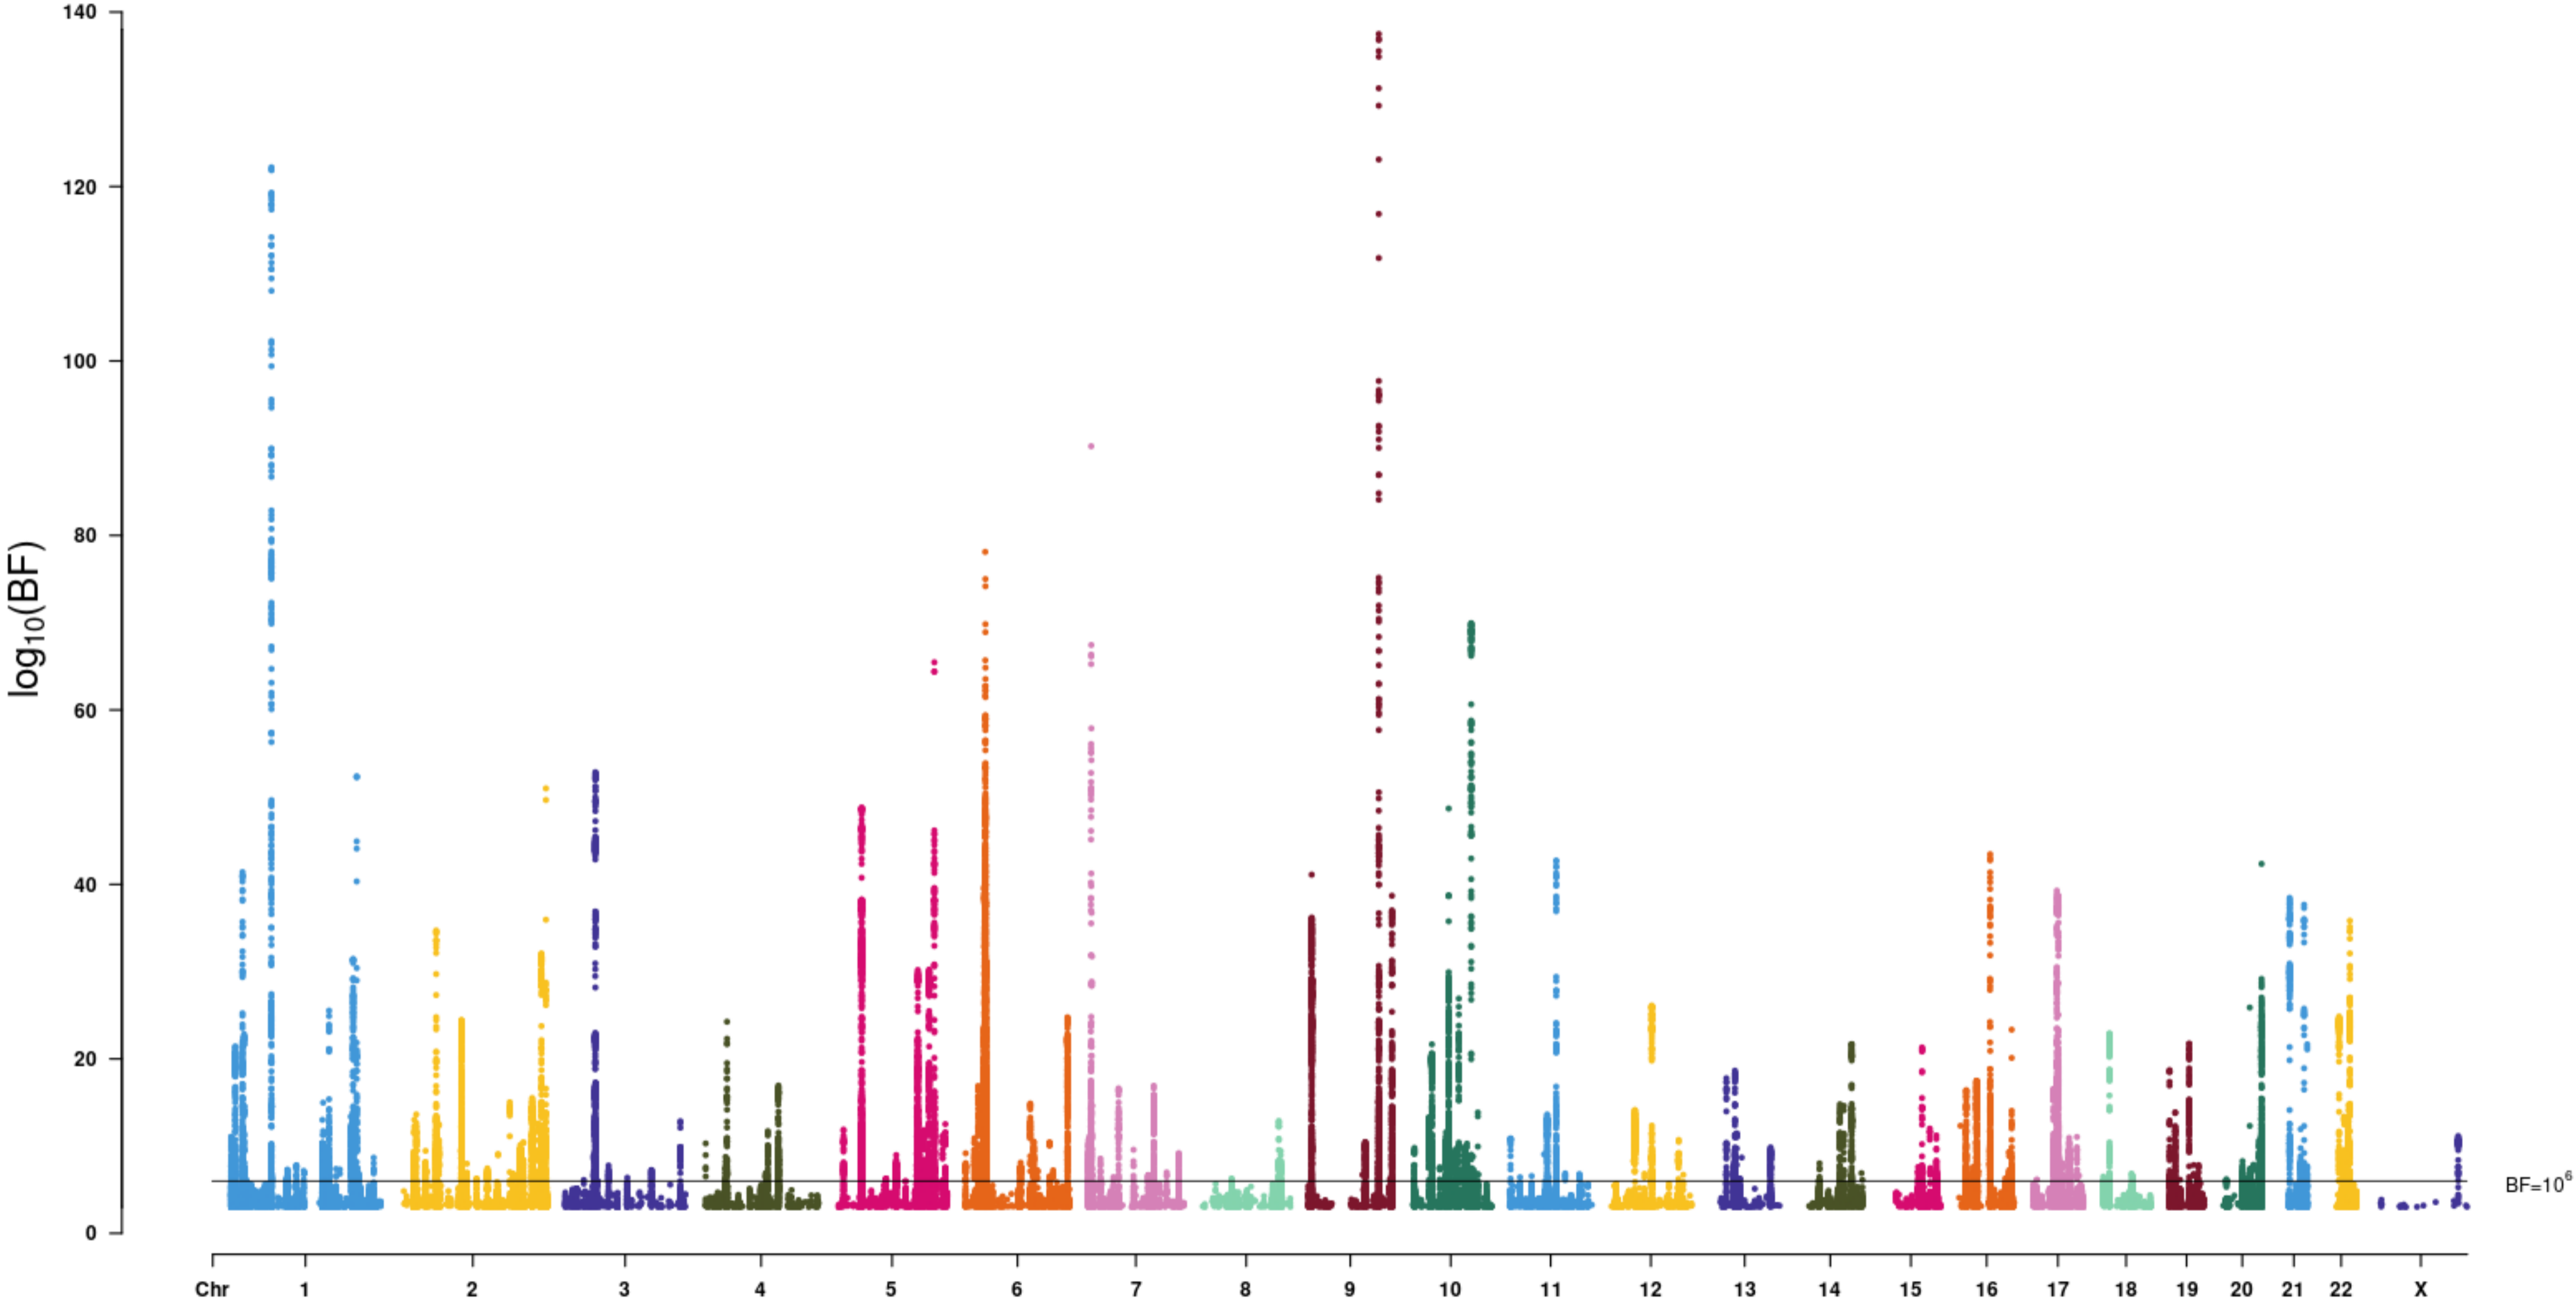

Supplement: NIHMS1903722-supplement-SD_1.pdf [file NIHMS1903722-supplement-SD_1.pdf]
